# Supplementary material for: A comprehensive assessment of electrochemical ocean alkalinity enhancement in seawater: kinetics, efficiency, and precipitation thresholds
Source: Copernicus journal article supplement (doi:10.5194/egusphere-2024-108), 2024-01-22
Supplement: Supplementary file 2 [file egusphere-2024-108-supplement.zip]

Archive with 8 entries (8 files):
- fS01.JPG
- fS02.JPG
- fS03.JPG
- fS04.JPG
- fS05.JPG
- fS06.JPG
- Ringham Biogeosciences supplementary data.csv
- Supplementary Materials for Ringham Biogeosciences 01122024.pdf
