# Supplementary material for: A comprehensive assessment of electrochemical ocean alkalinity enhancement in seawater: kinetics, efficiency, and precipitation thresholds
Source: Copernicus journal article supplement (doi:10.5194/egusphere-2024-108), 2024-01-22
Supplement: Supplementary file 2 [file egusphere-2024-108-supplement.zip › Ringham Biogeosciences supplementary data.csv]

01/12/2024 MCCR
Supplementary Data for "A comprehensive assessment of electrochemical ocean alkalinity enhancement in seawater: kinetics, efficiency, and precipitation thresholds"
These processed data are arranged in 7 sections, of which the first 6 represent time-series tank-scale experiments and the last is related to aquaria experiments.
For tank experiments, the sheet name denotes the target pH for a given experiment with abbreviated conditions:
#	Target pH
S	Still surface water
FA	Added forced air across the surface of the tank
B	Added air bubbles in the tank
Therefore, 8.5,S provides data for the case where enough NaOH was added to the experiment tank to raise bulk seawater pHT to 8.5, where the surface of the tank was still without the addition of forced air or air bubbling.
Tank data are arranged with Tank 1 (control tank) data provided for all variables at the top of the section followed by Tank 2 (experiment tank) below
Data by columns are noted as follows:
A:	Date, Time	The date and time in GMC for all following data
B:	Days since NaOHh addition	This column represents the time (in days) since the addition of NaOH to a given experiment tank. For example, NaOH was added to the 8.5,S experiment tank on 23-Sep-2022 18:00:00, for which DT is set at 0 days
C:	Tank (Control = 1, Experiment = 2)	Tank 1 represents the control tank and Tank 2 is the experiment tank
D:	Air Temp (+/- 2degC)	Collected by AcuRite Iris weather stations mounted at each tank, assumed uncertainty +/- 2degC
E:	Atm pCO2 (+/- 1.5%)	Collected by LiCOR Li-850 mounted above the tanks, assumed accuracy +/- 1.5%
F:	SW temp (degC)	Collected by Seabird 38 and 45 as noted in the main text, assumed +/- 0.001degC
G:	Sal	Collected by Seabird 45 as noted in the main text, assumed +/- 0.005
H:	DO %sat	Collected by PME miniDOT Logger at 10min resolutions and averaged to hourly readings, error corrected as recommended by manufacturer
I:	interpolated pHT	Interpolated data from the corrected spec-pH signal
J:	interpolated nTA (umol/kg)	Interpolated TA data normalized to salinity
K:	interpolated nDIC (umol/kg)	Interpolated DIC data normalized to salinity
L:	CO2sys-calculated pCO2SW (uatm)	Interpolated seawater pCO2 data calculated from CO2sys DIC-TA or TA-pH
M:	CO2sys-calculated Omega_aragonite	Interpolated saturation state of aragonite data calculated from CO2sys DIC-TA or TA-pH
N:	Delta_DIC/NaOH addition	Estimated CAR, or the change in DIC between control and experiment tanks relative to the addition of alkalinity
O:	Estimated percent equilibration relative to a CO2sys equilibrium calculation from initial conditions	Estimate percent air-sea equilibration between the tank observations and calculated equilibrium values for intial conditions via CO2sys
P:	Discrete nDIC (umol/kg), NOAA PMEL	Discrete TA data normalized to salinity, from NOAA PMEL (typical uncertainty +/- 0.5-1.5 umol/kg)
Q:	Discrete nTA (umol/kg), NOAA PMEL	Discrete DIC data normalized to salinity, from NOAA PMEL (typical uncertainty +/- 0.5-1.5 umol/kg)
R:	Discrete nTASBU (umol/kg), Stony Brook University	Discrete TA data normalized to salinity, from Stony Brook University (typical uncertainty +/- 5-10 umol/kg)
Data in the aquaria section are organized differently, where we only provide discrete data for which pH and TA were simultaneously available.
Aquaria data are arranged with the control casee provided for all variables at the top of the sheet, followed by all other experiments in increasing target pH
Data by columns are noted as follows:
A:	Experiment	This column notes whether an experiment is the control case, or the target pH to which enough NaOH was added to seawater to increase the bulk condition
B:	Days since NaOHh addition	This column represents the time (in days) since the addition of NaOH to a given tank
C:	SW Temp (degC)	Collected by temperature probe, +/- 0.05deg C
D:	Salinity	Collected by Seabird 45 at the beginning of an experiment and check by handheld salinograph (+/- 1 unit after initial value)
E:	pHT	Collected by SAMI for the initial value, then by corrected Ross electrode
F:	Discrete TA (umol/kg)	Discrete TA data from Stony Brook University (typical uncertainty +/- 5-10 umol/kg)
G:	CO2sys-calculated DIC (umol/kg)	Seawater DIC data calculated from CO2sys TA-pH
H:	CO2sys-calculated pCO2 (uatm)	Seawater pCO2 data calculated from CO2sys TA-pH
I:	CO2sys-calculated Omega_aragonite	Seawater saturation state of aragonite data calculated from CO2sys TA-pH
J:	Delta_DIC/NaOH addition	Estimated CAR, or the change in DIC between control and experiment tanks relative to the addition of alkalinity
K:	Estimated % equilibration	Estimate percent air-sea equilibration between the tank observations and calculated equilibrium values for intial conditions via CO2sys
Date, Time	Days since NaOHh addition	Tank (Control = 1, Experiment = 2)	Air Temp (+/- 2degC)	Atm pCO2 (+/- 1.5%)	SW temp (degC)	Sal	DO %sat	interpolated pHT	interpolated nTA (umol/kg)	interpolated nDIC (umol/kg)	CO2sys-calculated pCO2SW (uatm)	CO2sys-calculated Omega_aragonite	Delta_DIC/NaOH addition	Estimated percent equilibration relative to a CO2sys equilibrium calculation from initial conditions	Discrete nDIC (umol/kg), NOAA PMEL	Discrete nTA (umol/kg), NOAA PMEL	Discrete nTASBU (umol/kg), Stony Brook University	Experiment
'14-Sep-2022 16:00:00'	-9.083333333	1	NaN	NaN	18.4489844	28.53467883	93.64745833	8.445903035	2143.984764	1961.054349	427.7407336	2.155646385	NaN	NaN	NaN	NaN	NaN	8.5, S
'14-Sep-2022 17:00:00'	-9.041666667	1	NaN	NaN	18.45295346	28.53410803	93.27107017	8.440523868	2143.509015	1960.998306	428.7602592	2.151350534	NaN	NaN	NaN	NaN	NaN	8.5, S
'14-Sep-2022 18:00:00'	-9	1	NaN	NaN	18.45014326	28.53411629	93.11528817	8.435144702	2143.033266	1960.942263	429.6704828	2.146943243	NaN	NaN	NaN	NaN	NaN	8.5, S
'14-Sep-2022 19:00:00'	-8.958333333	1	NaN	NaN	18.44907075	28.53438552	92.8213645	8.429765535	2142.557517	1960.886221	430.6177211	2.1425589	NaN	NaN	NaN	NaN	NaN	8.5, S
'14-Sep-2022 20:00:00'	-8.916666667	1	NaN	NaN	18.44911389	28.53489056	92.63656983	8.424386368	2142.081768	1960.830178	431.5908735	2.138188628	NaN	NaN	NaN	NaN	NaN	8.5, S
'14-Sep-2022 21:00:00'	-8.875	1	NaN	NaN	18.45008708	28.53559185	92.56339083	8.419007202	2141.606019	1960.774135	432.5863371	2.133830396	NaN	NaN	NaN	NaN	NaN	8.5, S
'14-Sep-2022 22:00:00'	-8.833333333	1	NaN	NaN	18.44987417	28.53640278	92.5075455	8.413628035	2141.13027	1960.718093	433.5655438	2.129454272	NaN	NaN	NaN	NaN	NaN	8.5, S
'14-Sep-2022 23:00:00'	-8.791666667	1	NaN	NaN	18.44896518	28.5373234	92.51570167	8.408248868	2140.654521	1960.66205	434.5371295	2.125067655	NaN	NaN	NaN	NaN	NaN	8.5, S
'15-Sep-2022 00:00:00'	-8.75	1	NaN	NaN	18.45299776	28.5381507	92.25701033	8.402869702	2140.178772	1960.606007	435.5994885	2.120758477	NaN	NaN	NaN	NaN	NaN	8.5, S
'15-Sep-2022 01:00:00'	-8.708333333	1	NaN	NaN	18.4606775	28.53894944	92.24172033	8.397490535	2139.703023	1960.549965	436.7307906	2.116505964	NaN	NaN	NaN	NaN	NaN	8.5, S
'15-Sep-2022 02:00:00'	-8.666666667	1	NaN	NaN	18.46558914	28.53984986	92.194033	8.392111368	2139.227274	1960.493922	437.8177511	2.112212108	NaN	NaN	NaN	NaN	NaN	8.5, S
'15-Sep-2022 03:00:00'	-8.625	1	NaN	NaN	18.47316975	28.54076275	92.00782567	8.386732202	2138.751525	1960.437879	438.9569432	2.107959481	NaN	NaN	NaN	NaN	NaN	8.5, S
'15-Sep-2022 04:00:00'	-8.583333333	1	NaN	NaN	18.47792833	28.54171667	91.78407583	8.381353035	2138.275776	1960.381837	440.0499069	2.103665999	NaN	NaN	NaN	NaN	NaN	8.5, S
'15-Sep-2022 05:00:00'	-8.541666667	1	NaN	NaN	18.48410529	28.54272646	91.732469	8.375973868	2137.800027	1960.325794	441.1732391	2.099394334	NaN	NaN	NaN	NaN	NaN	8.5, S
'15-Sep-2022 06:00:00'	-8.5	1	NaN	NaN	18.4878409	28.54376639	91.589096	8.370594702	2137.324278	1960.269751	442.2568078	2.095087823	NaN	NaN	NaN	NaN	NaN	8.5, S
'15-Sep-2022 07:00:00'	-8.458333333	1	NaN	NaN	18.49248139	28.54484972	91.42029283	8.365215535	2136.848529	1960.213709	443.3613385	2.090795794	NaN	NaN	NaN	NaN	NaN	8.5, S
'15-Sep-2022 08:00:00'	-8.416666667	1	NaN	NaN	18.49771058	28.54585376	91.2569585	8.359836368	2136.37278	1960.157666	444.479736	2.086515861	NaN	NaN	NaN	NaN	NaN	8.5, S
'15-Sep-2022 09:00:00'	-8.375	1	NaN	NaN	18.50236208	28.54692135	91.10683267	8.354457202	2135.897031	1960.101623	445.5924932	2.082228108	NaN	NaN	NaN	NaN	NaN	8.5, S
'15-Sep-2022 10:00:00'	-8.333333333	1	NaN	NaN	18.4989133	28.54821163	90.93294317	8.349078035	2135.421282	1960.045581	446.5637309	2.077818865	NaN	NaN	NaN	NaN	NaN	8.5, S
'15-Sep-2022 11:00:00'	-8.291666667	1	NaN	NaN	18.49566	28.549495	90.78333567	8.343698868	2134.945533	1959.989538	447.5419757	2.073414895	NaN	NaN	NaN	NaN	NaN	8.5, S
'15-Sep-2022 12:00:00'	-8.25	1	NaN	NaN	18.49474915	28.55092203	90.68372833	8.338319702	2134.469784	1959.933495	448.5685559	2.06904489	NaN	NaN	NaN	NaN	NaN	8.5, S
'15-Sep-2022 13:00:00'	-8.208333333	1	NaN	NaN	18.49337618	28.5524964	90.60723867	8.332940535	2133.994035	1959.877453	449.5921443	2.064667565	NaN	NaN	NaN	NaN	NaN	8.5, S
'15-Sep-2022 14:00:00'	-8.166666667	1	NaN	NaN	18.49416528	28.55409778	90.5939035	8.327561368	2133.518286	1959.82141	450.6597144	2.060323617	NaN	NaN	NaN	NaN	NaN	8.5, S
'15-Sep-2022 15:00:00'	-8.125	1	NaN	NaN	18.49568901	28.55643493	90.715542	8.322182202	2133.042537	1959.765367	451.7537365	2.055978953	NaN	NaN	NaN	NaN	NaN	8.5, S
'15-Sep-2022 16:00:00'	-8.083333333	1	NaN	NaN	18.49401302	28.55838781	90.6963865	8.316803035	2132.566788	1959.709325	452.787774	2.051596885	NaN	NaN	NaN	NaN	NaN	8.5, S
'15-Sep-2022 17:00:00'	-8.041666667	1	NaN	NaN	18.49055833	28.56008389	90.65971467	8.311423868	2132.091039	1959.653282	453.7894011	2.047195926	NaN	NaN	NaN	NaN	NaN	8.5, S
'15-Sep-2022 18:00:00'	-8	1	NaN	NaN	18.48669211	28.56184338	90.52525317	8.306044702	2131.61529	1959.597239	454.7877836	2.042790178	NaN	NaN	NaN	NaN	NaN	8.5, S
'15-Sep-2022 19:00:00'	-7.958333333	1	NaN	NaN	18.48511634	28.56343657	90.53199983	8.300665535	2131.139541	1959.541197	455.8305186	2.038423149	NaN	NaN	NaN	NaN	NaN	8.5, S
'15-Sep-2022 20:00:00'	-7.916666667	1	NaN	NaN	18.47868917	28.56515444	90.55941817	8.295286368	2130.663792	1959.485154	456.7878659	2.033985741	NaN	NaN	NaN	NaN	NaN	8.5, S
'15-Sep-2022 21:00:00'	-7.875	1	NaN	NaN	18.4722769	28.56682845	90.58907517	8.289907202	2130.188043	1959.429111	457.7484287	2.029551866	NaN	NaN	NaN	NaN	NaN	8.5, S
'15-Sep-2022 22:00:00'	-7.833333333	1	NaN	NaN	18.46587313	28.56852271	90.53981233	8.284528035	2129.712294	1959.373069	458.7128907	2.025120268	NaN	NaN	NaN	NaN	NaN	8.5, S
'15-Sep-2022 23:00:00'	-7.791666667	1	NaN	NaN	18.45541556	28.57030333	90.50799033	8.279148868	2129.236545	1959.317026	459.6056583	2.020631109	NaN	NaN	NaN	NaN	NaN	8.5, S
'16-Sep-2022 00:00:00'	-7.75	1	NaN	NaN	18.44582451	28.57199521	90.55633667	8.273769702	2128.760796	1959.260983	460.5168992	2.016158779	NaN	NaN	NaN	NaN	NaN	8.5, S
'16-Sep-2022 01:00:00'	-7.708333333	1	NaN	NaN	18.43417396	28.57373795	90.633562	8.268390535	2128.285047	1959.204941	461.3931881	2.011658598	NaN	NaN	NaN	NaN	NaN	8.5, S
'16-Sep-2022 02:00:00'	-7.666666667	1	NaN	NaN	18.42226611	28.57546389	90.591512	8.263011368	2127.809298	1959.148898	462.2675848	2.007157834	NaN	NaN	NaN	NaN	NaN	8.5, S
'16-Sep-2022 03:00:00'	-7.625	1	NaN	NaN	18.40845678	28.5772339	90.54604083	8.257632202	2127.333549	1959.092855	463.1096737	2.002631854	NaN	NaN	NaN	NaN	NaN	8.5, S
'16-Sep-2022 04:00:00'	-7.583333333	1	NaN	NaN	18.39958806	28.57892	90.55620017	8.252253035	2126.8578	1959.036813	464.0475869	1.998181003	NaN	NaN	NaN	NaN	NaN	8.5, S
'16-Sep-2022 05:00:00'	-7.541666667	1	NaN	NaN	18.39724072	28.58059252	90.56388367	8.246873868	2126.382051	1958.98077	465.1128291	1.993826261	NaN	NaN	NaN	NaN	NaN	8.5, S
'16-Sep-2022 06:00:00'	-7.5	1	NaN	NaN	18.39560817	28.5823169	90.565844	8.241494702	2125.906302	1958.924727	466.1962985	1.989483201	NaN	NaN	NaN	NaN	NaN	8.5, S
'16-Sep-2022 07:00:00'	-7.458333333	1	NaN	NaN	18.39883583	28.58395667	90.66667	8.236115535	2125.430553	1958.868684	467.3756348	1.985213275	NaN	NaN	NaN	NaN	NaN	8.5, S
'16-Sep-2022 08:00:00'	-7.416666667	1	NaN	NaN	18.41218975	28.5854795	90.85883783	8.230736368	2124.954804	1958.812642	468.7520229	1.981091753	NaN	NaN	NaN	NaN	NaN	8.5, S
'16-Sep-2022 09:00:00'	-7.375	1	NaN	NaN	18.42789017	28.58693539	90.728652	8.225357202	2124.479055	1958.756599	470.178139	1.97700666	NaN	NaN	NaN	NaN	NaN	8.5, S
'16-Sep-2022 10:00:00'	-7.333333333	1	NaN	NaN	18.44505265	28.58835599	90.72407017	8.219978035	2124.003306	1958.700556	471.6377273	1.972944806	NaN	NaN	NaN	NaN	NaN	8.5, S
'16-Sep-2022 11:00:00'	-7.291666667	1	NaN	NaN	18.46338449	28.58977424	90.74225033	8.214598868	2123.527557	1958.644514	473.1258266	1.968901357	NaN	NaN	NaN	NaN	NaN	8.5, S
'16-Sep-2022 12:00:00'	-7.25	1	NaN	NaN	18.48313287	28.59113596	90.809226	8.209219702	2123.051808	1958.588471	474.6467602	1.964880769	NaN	NaN	NaN	NaN	NaN	8.5, S
'16-Sep-2022 13:00:00'	-7.208333333	1	NaN	NaN	18.49793649	28.59254123	90.93117817	8.203840535	2122.576059	1958.532428	476.0783881	1.960791038	NaN	NaN	NaN	NaN	NaN	8.5, S
'16-Sep-2022 14:00:00'	-7.166666667	1	NaN	NaN	18.50436167	28.59412	91.16570067	8.198840535	2122.10031	1958.476386	477.3546778	1.956581474	NaN	NaN	NaN	NaN	NaN	8.5, S
'16-Sep-2022 15:00:00'	-7.125	1	NaN	NaN	18.50673838	28.59587031	91.01765867	8.193840535	2121.624561	1958.420343	478.5590056	1.952313813	NaN	NaN	NaN	NaN	NaN	8.5, S
'16-Sep-2022 16:00:00'	-7.083333333	1	NaN	NaN	18.49953705	28.5978649	90.88678967	8.188840535	2121.148812	1958.3643	479.5835361	1.947908961	NaN	NaN	NaN	NaN	NaN	8.5, S
'16-Sep-2022 17:00:00'	-7.041666667	1	NaN	NaN	18.49114611	28.59974333	90.87056983	8.183840535	2120.673063	1958.308258	480.5870583	1.943492065	NaN	NaN	NaN	NaN	NaN	8.5, S
'16-Sep-2022 18:00:00'	-7	1	NaN	NaN	18.48339916	28.60155927	90.888331	8.178840535	2120.197314	1958.252215	481.6061733	1.939088056	NaN	NaN	NaN	NaN	NaN	8.5, S
'16-Sep-2022 19:00:00'	-6.958333333	1	NaN	NaN	18.47686056	28.60330833	90.86313983	8.173840535	2119.721565	1958.196172	482.6520155	1.934704942	NaN	NaN	NaN	NaN	NaN	8.5, S
'16-Sep-2022 20:00:00'	-6.916666667	1	NaN	NaN	18.47056518	28.60502145	90.82856967	8.168840535	2119.245816	1958.14013	483.7061037	1.930328552	NaN	NaN	NaN	NaN	NaN	8.5, S
'16-Sep-2022 21:00:00'	-6.875	1	NaN	NaN	18.46461569	28.60668964	90.8590925	8.163840535	2118.770067	1958.084087	484.7703993	1.92596046	NaN	NaN	NaN	NaN	NaN	8.5, S
'16-Sep-2022 22:00:00'	-6.833333333	1	NaN	NaN	18.46019028	28.60830444	90.856806	8.158840535	2118.294318	1958.028044	485.8681991	1.921617267	NaN	NaN	NaN	NaN	NaN	8.5, S
'16-Sep-2022 23:00:00'	-6.791666667	1	NaN	NaN	18.45582535	28.60983565	91.0051725	8.153840535	2117.818569	1957.972002	486.9702577	1.91727894	NaN	NaN	NaN	NaN	NaN	8.5, S
'17-Sep-2022 00:00:00'	-6.75	1	NaN	NaN	18.45465434	28.6112986	91.0220955	8.148840535	2117.34282	1957.915959	488.139156	1.912988908	NaN	NaN	NaN	NaN	NaN	8.5, S
'17-Sep-2022 01:00:00'	-6.708333333	1	NaN	NaN	18.45522	28.61270472	90.9400265	8.143840535	2116.867071	1957.859916	489.3464159	1.90872649	NaN	NaN	NaN	NaN	NaN	8.5, S
'17-Sep-2022 02:00:00'	-6.666666667	1	NaN	NaN	18.45407047	28.61409972	90.8938165	8.138840535	2116.391321	1957.803874	490.5238712	1.90444282	NaN	NaN	NaN	NaN	NaN	8.5, S
'17-Sep-2022 03:00:00'	-6.625	1	NaN	NaN	18.45504326	28.61540646	90.91379683	8.133840535	2115.915572	1957.747831	491.7472064	1.900192577	NaN	NaN	NaN	NaN	NaN	8.5, S
'17-Sep-2022 04:00:00'	-6.583333333	1	NaN	NaN	18.45081662	28.61681994	90.9102075	8.128840535	2115.439823	1957.691788	492.8722182	1.895870876	NaN	NaN	NaN	NaN	NaN	8.5, S
'17-Sep-2022 05:00:00'	-6.541666667	1	NaN	NaN	18.44526351	28.61822396	90.9201125	8.123840535	2114.964074	1957.635746	493.9746845	1.891533602	NaN	NaN	NaN	NaN	NaN	8.5, S
'17-Sep-2022 06:00:00'	-6.5	1	NaN	NaN	18.44247612	28.61954663	90.92654283	8.118840535	2114.488325	1957.579703	495.1360483	1.887238596	NaN	NaN	NaN	NaN	NaN	8.5, S
'17-Sep-2022 07:00:00'	-6.458333333	1	NaN	NaN	18.43862465	28.62085429	90.96292617	8.113840535	2114.012576	1957.52366	496.2801462	1.882931733	NaN	NaN	NaN	NaN	NaN	8.5, S
'17-Sep-2022 08:00:00'	-6.416666667	1	NaN	NaN	18.43391393	28.62218579	90.9355755	8.108840535	2113.536827	1957.467618	497.411519	1.878615274	NaN	NaN	NaN	NaN	NaN	8.5, S
'17-Sep-2022 09:00:00'	-6.375	1	NaN	NaN	18.42757577	28.6235538	91.004073	8.103840535	2113.061078	1957.411575	498.5146523	1.874278513	NaN	NaN	NaN	NaN	NaN	8.5, S
'17-Sep-2022 10:00:00'	-6.333333333	1	NaN	NaN	18.42646122	28.62488476	90.99342967	8.098840535	2112.585329	1957.355532	499.7277592	1.870016876	NaN	NaN	NaN	NaN	NaN	8.5, S
'17-Sep-2022 11:00:00'	-6.291666667	1	NaN	NaN	18.42763148	28.62627772	90.97913467	8.093840535	2112.10958	1957.29949	500.992959	1.865788133	NaN	NaN	NaN	NaN	NaN	8.5, S
'17-Sep-2022 12:00:00'	-6.25	1	NaN	NaN	18.42864129	28.62780084	90.9905685	8.088840535	2111.633831	1957.243447	502.2615283	1.861557574	NaN	NaN	NaN	NaN	NaN	8.5, S
'17-Sep-2022 13:00:00'	-6.208333333	1	NaN	NaN	18.43028421	28.62928781	91.02432383	8.083840535	2111.158082	1957.187404	503.5475324	1.857338765	NaN	NaN	NaN	NaN	NaN	8.5, S
'17-Sep-2022 14:00:00'	-6.166666667	1	NaN	NaN	18.43380056	28.63075722	91.146091	8.078611368	2110.682333	1957.131362	504.8768081	1.853148325	NaN	NaN	NaN	NaN	NaN	8.5, S
'17-Sep-2022 15:00:00'	-6.125	1	NaN	NaN	18.42968366	28.63231014	91.21112917	8.073382202	2110.206584	1957.075319	506.0552904	1.848854824	NaN	NaN	NaN	NaN	NaN	8.5, S
'17-Sep-2022 16:00:00'	-6.083333333	1	NaN	NaN	18.42611468	28.63372798	91.11800383	8.068153035	2109.730835	1957.019276	507.2478142	1.844573679	NaN	NaN	NaN	NaN	NaN	8.5, S
'17-Sep-2022 17:00:00'	-6.041666667	1	NaN	NaN	18.42604472	28.63507972	91.07426733	8.062923868	2109.255086	1956.963234	508.516408	1.84034389	NaN	NaN	NaN	NaN	NaN	8.5, S
'17-Sep-2022 18:00:00'	-6	1	NaN	NaN	18.42596761	28.63638648	91.10445617	8.057694702	2108.779337	1956.907191	509.7892061	1.836117291	NaN	NaN	NaN	NaN	NaN	8.5, S
'17-Sep-2022 19:00:00'	-5.958333333	1	NaN	NaN	18.42656944	28.63766139	91.25807333	8.052465535	2108.303588	1956.851148	511.0806592	1.831902985	NaN	NaN	NaN	NaN	NaN	8.5, S
'17-Sep-2022 20:00:00'	-5.916666667	1	NaN	NaN	18.42784488	28.63894321	91.3256325	8.047236368	2107.827839	1956.795106	512.3912996	1.827700257	NaN	NaN	NaN	NaN	NaN	8.5, S
'17-Sep-2022 21:00:00'	-5.875	1	NaN	NaN	18.42877859	28.64016085	91.3148635	8.042007202	2107.35209	1956.739063	513.6991026	1.823496457	NaN	NaN	NaN	NaN	NaN	8.5, S
'17-Sep-2022 22:00:00'	-5.833333333	1	NaN	NaN	18.43189889	28.64136972	91.2337975	8.036778035	2106.876341	1956.68302	515.057688	1.819324895	NaN	NaN	NaN	NaN	NaN	8.5, S
'17-Sep-2022 23:00:00'	-5.791666667	1	NaN	NaN	18.43703906	28.64249363	91.19856833	8.031548868	2106.400592	1956.626978	516.4628887	1.815184398	NaN	NaN	NaN	NaN	NaN	8.5, S
'18-Sep-2022 00:00:00'	-5.75	1	NaN	NaN	18.44542648	28.64348338	91.19133667	8.026319702	2105.924843	1956.570935	517.9401917	1.811092168	NaN	NaN	NaN	NaN	NaN	8.5, S
'18-Sep-2022 01:00:00'	-5.708333333	1	NaN	NaN	18.45737194	28.64440194	91.22554017	8.021090535	2105.449094	1956.514892	519.4975633	1.807051259	NaN	NaN	NaN	NaN	NaN	8.5, S
'18-Sep-2022 02:00:00'	-5.666666667	1	NaN	NaN	18.4608385	28.64547645	91.26584467	8.015861368	2104.973345	1956.45885	520.8842088	1.802896129	NaN	NaN	NaN	NaN	NaN	8.5, S
'18-Sep-2022 03:00:00'	-5.625	1	NaN	NaN	18.45754718	28.64670282	91.24991167	8.010632202	2104.497596	1956.402807	522.1352579	1.798650427	NaN	NaN	NaN	NaN	NaN	8.5, S
'18-Sep-2022 04:00:00'	-5.583333333	1	NaN	NaN	18.45385889	28.64787806	91.25302183	8.005403035	2104.021847	1956.346764	523.382079	1.794402972	NaN	NaN	NaN	NaN	NaN	8.5, S
'18-Sep-2022 05:00:00'	-5.541666667	1	NaN	NaN	18.451359	28.64901136	91.26108183	8.000173868	2103.546098	1956.290722	524.6585064	1.79017487	NaN	NaN	NaN	NaN	NaN	8.5, S
'18-Sep-2022 06:00:00'	-5.5	1	NaN	NaN	18.45041685	28.65011966	91.37309467	7.994944702	2103.070349	1956.234679	525.9728466	1.785970733	NaN	NaN	NaN	NaN	NaN	8.5, S
'18-Sep-2022 07:00:00'	-5.458333333	1	NaN	NaN	18.44810529	28.65123343	91.41853667	7.989715535	2102.5946	1956.178636	527.2631806	1.781750946	NaN	NaN	NaN	NaN	NaN	8.5, S
'18-Sep-2022 08:00:00'	-5.416666667	1	NaN	NaN	18.43787147	28.65260637	91.34342033	7.984486368	2102.118851	1956.122594	528.3924161	1.777424465	NaN	NaN	NaN	NaN	NaN	8.5, S
'18-Sep-2022 09:00:00'	-5.375	1	NaN	NaN	18.41915899	28.65431404	91.3271165	7.979257202	2101.643102	1956.066551	529.3486671	1.772983374	NaN	NaN	NaN	NaN	NaN	8.5, S
'18-Sep-2022 10:00:00'	-5.333333333	1	NaN	NaN	18.39968691	28.65605404	91.2351215	7.974028035	2101.167353	1956.010508	530.2927839	1.76853536	NaN	NaN	NaN	NaN	NaN	8.5, S
'18-Sep-2022 11:00:00'	-5.291666667	1	NaN	NaN	18.38029361	28.65780472	91.20966117	7.968798868	2100.691604	1955.954465	531.2424599	1.764091925	NaN	NaN	NaN	NaN	NaN	8.5, S
'18-Sep-2022 12:00:00'	-5.25	1	NaN	NaN	18.36068908	28.65959496	91.18113217	7.963569702	2100.215855	1955.898423	532.1918665	1.75964881	NaN	NaN	NaN	NaN	NaN	8.5, S
'18-Sep-2022 13:00:00'	-5.208333333	1	NaN	NaN	18.34342646	28.66130975	91.16572667	7.958340535	2099.740106	1955.84238	533.1945856	1.755241411	NaN	NaN	NaN	NaN	NaN	8.5, S
'18-Sep-2022 14:00:00'	-5.166666667	1	NaN	NaN	18.32745333	28.66300583	91.15293017	7.954078035	2099.264357	1955.786337	534.2289059	1.750854851	NaN	NaN	NaN	NaN	NaN	8.5, S
'18-Sep-2022 15:00:00'	-5.125	1	NaN	NaN	18.3133451	28.66467395	91.35965283	7.949815535	2098.788608	1955.730295	535.3073561	1.746496728	NaN	NaN	NaN	NaN	NaN	8.5, S
'18-Sep-2022 16:00:00'	-5.083333333	1	NaN	NaN	18.30217799	28.66629359	91.38312267	7.945553035	2098.312859	1955.674252	536.4532983	1.742181313	NaN	NaN	NaN	NaN	NaN	8.5, S
'18-Sep-2022 17:00:00'	-5.041666667	1	NaN	NaN	18.28871472	28.66803972	91.281584	7.941290535	2097.83711	1955.618209	537.5554983	1.737837316	NaN	NaN	NaN	NaN	NaN	8.5, S
'18-Sep-2022 18:00:00'	-5	1	NaN	NaN	18.27483529	28.66983333	91.317769	7.937028035	2097.361361	1955.562167	538.6536168	1.733490636	NaN	NaN	NaN	NaN	NaN	8.5, S
'18-Sep-2022 19:00:00'	-4.958333333	1	NaN	NaN	18.26225571	28.67161866	91.18018083	7.932765535	2096.885612	1955.506124	539.7843674	1.729164494	NaN	NaN	NaN	NaN	NaN	8.5, S
'18-Sep-2022 20:00:00'	-4.916666667	1	NaN	NaN	18.25108111	28.67340306	91.32579283	7.928503035	2096.409863	1955.450081	540.9503483	1.724860067	NaN	NaN	NaN	NaN	NaN	8.5, S
'18-Sep-2022 21:00:00'	-4.875	1	NaN	NaN	18.24003389	28.67514538	91.28580483	7.924240535	2095.934114	1955.394039	542.1231406	1.72056126	NaN	NaN	NaN	NaN	NaN	8.5, S
'18-Sep-2022 22:00:00'	-4.833333333	1	NaN	NaN	18.23118217	28.67685682	91.19710683	7.919978035	2095.458365	1955.337996	543.3484425	1.716294718	NaN	NaN	NaN	NaN	NaN	8.5, S
'18-Sep-2022 23:00:00'	-4.791666667	1	NaN	NaN	18.22719083	28.67841972	91.25225	7.915715535	2094.982616	1955.281953	544.683689	1.712096466	NaN	NaN	NaN	NaN	NaN	8.5, S
'19-Sep-2022 00:00:00'	-4.75	1	NaN	NaN	18.22228459	28.67999412	91.47516133	7.911453035	2094.506867	1955.225911	546.0042303	1.707889279	NaN	NaN	NaN	NaN	NaN	8.5, S
'19-Sep-2022 01:00:00'	-4.708333333	1	NaN	NaN	18.21699528	28.6815275	91.45539267	7.907190535	2094.031118	1955.169868	547.3209954	1.70368083	NaN	NaN	NaN	NaN	NaN	8.5, S
'19-Sep-2022 02:00:00'	-4.666666667	1	NaN	NaN	18.21945655	28.68285209	91.67605317	7.902928035	2093.555369	1955.113825	548.8121773	1.699578295	NaN	NaN	NaN	NaN	NaN	8.5, S
'19-Sep-2022 03:00:00'	-4.625	1	NaN	NaN	18.23077759	28.68384706	93.53291667	7.898665535	2093.07962	1955.057783	550.5020634	1.695597217	NaN	NaN	NaN	NaN	NaN	8.5, S
'19-Sep-2022 04:00:00'	-4.583333333	1	NaN	NaN	18.23801278	28.68493361	95.32427517	7.894403035	2092.603871	1955.00174	552.1091872	1.691564846	NaN	NaN	NaN	NaN	NaN	8.5, S
'19-Sep-2022 05:00:00'	-4.541666667	1	NaN	NaN	18.24165292	28.68606379	95.6713135	7.890140535	2092.128122	1954.945697	553.6431661	1.687488365	NaN	NaN	NaN	NaN	NaN	8.5, S
'19-Sep-2022 06:00:00'	-4.5	1	NaN	NaN	18.24237675	28.68727059	95.45546217	7.885878035	2091.652373	1954.889655	555.1191268	1.683376218	NaN	NaN	NaN	NaN	NaN	8.5, S
'19-Sep-2022 07:00:00'	-4.458333333	1	NaN	NaN	18.24102583	28.68850056	94.92198717	7.881615535	2091.176624	1954.833612	556.5547905	1.679240099	NaN	NaN	NaN	NaN	NaN	8.5, S
'19-Sep-2022 08:00:00'	-4.416666667	1	NaN	NaN	18.23997716	28.68969749	94.8025435	7.877353035	2090.700875	1954.777569	558.0026453	1.6751113	NaN	NaN	NaN	NaN	NaN	8.5, S
'19-Sep-2022 09:00:00'	-4.375	1	NaN	NaN	18.23937268	28.69088169	94.72261317	7.873090535	2090.225126	1954.721527	559.466269	1.670991343	NaN	NaN	NaN	NaN	NaN	8.5, S
'19-Sep-2022 10:00:00'	-4.333333333	1	NaN	NaN	18.23832881	28.69206953	94.68333467	7.868828035	2089.749377	1954.665484	560.9259803	1.666868728	NaN	NaN	NaN	NaN	NaN	8.5, S
'19-Sep-2022 11:00:00'	-4.291666667	1	NaN	NaN	18.23718969	28.69323788	94.70107317	7.864565535	2089.273628	1954.609441	562.3892208	1.662748186	NaN	NaN	NaN	NaN	NaN	8.5, S
'19-Sep-2022 12:00:00'	-4.25	1	18.86666667	NaN	18.23698539	28.69436938	95.00679033	7.860303035	2088.797879	1954.553399	563.8792052	1.658643055	NaN	NaN	NaN	NaN	NaN	8.5, S
'19-Sep-2022 13:00:00'	-4.208333333	1	18.88333333	NaN	18.23924848	28.69544266	95.1582085	7.856040535	2088.32213	1954.497356	565.430789	1.654573028	NaN	NaN	NaN	NaN	NaN	8.5, S
'19-Sep-2022 14:00:00'	-4.166666667	1	18.99166667	NaN	18.24318914	28.69648106	95.03977767	7.853528035	2087.846381	1954.441313	567.0266913	1.650527654	NaN	NaN	NaN	NaN	NaN	8.5, S
'19-Sep-2022 15:00:00'	-4.125	1	19.25	NaN	18.25050309	28.69748427	94.92852567	7.851015535	2087.370632	1954.385271	568.7061468	1.646528325	NaN	NaN	NaN	NaN	NaN	8.5, S
'19-Sep-2022 16:00:00'	-4.083333333	1	19.14166667	NaN	18.25360637	28.69868089	94.76425733	7.848503035	2086.894883	1954.329228	570.2986622	1.642475955	NaN	NaN	NaN	NaN	NaN	8.5, S
'19-Sep-2022 17:00:00'	-4.041666667	1	19.125	NaN	18.25403788	28.69990919	94.780473	7.845990535	2086.419134	1954.273185	571.8366671	1.638392378	NaN	NaN	NaN	NaN	NaN	8.5, S
'19-Sep-2022 18:00:00'	-4	1	19.15	NaN	18.25013904	28.6999014	94.81492533	7.843478035	2085.943385	1954.217143	573.2627774	1.634273657	NaN	NaN	NaN	NaN	NaN	8.5, S
'19-Sep-2022 19:00:00'	-3.958333333	1	19.11666667	NaN	18.25509307	28.70006343	94.74796733	7.840965535	2085.467636	1954.1611	574.9023877	1.630267215	NaN	NaN	NaN	NaN	NaN	8.5, S
'19-Sep-2022 20:00:00'	-3.916666667	1	19.1	NaN	18.26810669	28.7010585	94.62667717	7.838453035	2084.991887	1954.105057	576.7485053	1.626353964	NaN	NaN	NaN	NaN	NaN	8.5, S
'19-Sep-2022 21:00:00'	-3.875	1	19.13333333	NaN	18.28017388	28.7021236	94.618649	7.835940535	2084.516138	1954.049015	578.5816339	1.622430585	NaN	NaN	NaN	NaN	NaN	8.5, S
'19-Sep-2022 22:00:00'	-3.833333333	1	19.05833333	NaN	18.29097091	28.70315512	94.60722433	7.833428035	2084.040389	1953.992972	580.3925287	1.618494429	NaN	NaN	NaN	NaN	NaN	8.5, S
'19-Sep-2022 23:00:00'	-3.791666667	1	19.09166667	NaN	18.3036649	28.70411671	94.55181383	7.830915535	2083.56464	1953.936929	582.2546836	1.614585727	NaN	NaN	NaN	NaN	NaN	8.5, S
'20-Sep-2022 00:00:00'	-3.75	1	18.77083333	NaN	18.31531887	28.7050707	94.55145017	7.828403035	2083.088891	1953.880887	584.100391	1.610666821	NaN	NaN	NaN	NaN	NaN	8.5, S
'20-Sep-2022 01:00:00'	-3.708333333	1	18.89166667	NaN	18.32820639	28.70595778	94.53917317	7.825890535	2082.613142	1953.824844	585.9822069	1.606766972	NaN	NaN	NaN	NaN	NaN	8.5, S
'20-Sep-2022 02:00:00'	-3.666666667	1	18.72083333	NaN	18.3393385	28.70689806	94.55897083	7.823378035	2082.137393	1953.768801	587.8315337	1.602847237	NaN	NaN	NaN	NaN	NaN	8.5, S
'20-Sep-2022 03:00:00'	-3.625	1	18.77083333	NaN	18.35113239	28.70782732	94.54163183	7.820865535	2081.661644	1953.712759	589.7044249	1.598938704	NaN	NaN	NaN	NaN	NaN	8.5, S
'20-Sep-2022 04:00:00'	-3.583333333	1	18.76666667	NaN	18.36068028	28.70877667	94.538839	7.818353035	2081.185895	1953.656716	591.5323667	1.595004702	NaN	NaN	NaN	NaN	NaN	8.5, S
'20-Sep-2022 05:00:00'	-3.541666667	1	18.72173913	NaN	18.37171607	28.7096687	94.58471033	7.815840535	2080.710146	1953.600673	593.4028391	1.591092831	NaN	NaN	NaN	NaN	NaN	8.5, S
'20-Sep-2022 06:00:00'	-3.5	1	18.78181818	NaN	18.38037577	28.71063521	94.55725717	7.813328035	2080.234397	1953.544631	595.225753	1.58715329	NaN	NaN	NaN	NaN	NaN	8.5, S
'20-Sep-2022 07:00:00'	-3.458333333	1	18.62916667	NaN	18.39005778	28.71153111	94.5683075	7.810815535	2079.758648	1953.488588	597.0799907	1.583230267	NaN	NaN	NaN	NaN	NaN	8.5, S
'20-Sep-2022 08:00:00'	-3.416666667	1	18.75454545	NaN	18.39771524	28.71248227	94.507353	7.808303035	2079.282899	1953.432545	598.8944231	1.579284321	NaN	NaN	NaN	NaN	NaN	8.5, S
'20-Sep-2022 09:00:00'	-3.375	1	18.62083333	NaN	18.40715437	28.71339944	94.5321545	7.805790535	2078.80715	1953.376503	600.7591332	1.575363867	NaN	NaN	NaN	NaN	NaN	8.5, S
'20-Sep-2022 10:00:00'	-3.333333333	1	18.95625	NaN	18.41383778	28.71433972	94.600726	7.803278035	2078.331401	1953.32046	602.5656493	1.571411936	NaN	NaN	NaN	NaN	NaN	8.5, S
'20-Sep-2022 11:00:00'	-3.291666667	1	18.89545455	NaN	18.42069114	28.71528061	94.61714583	7.800765535	2077.855652	1953.264417	604.3840741	1.567465132	NaN	NaN	NaN	NaN	NaN	8.5, S
'20-Sep-2022 12:00:00'	-3.25	1	18.88181818	NaN	18.42726056	28.71623775	94.6382025	7.798253035	2077.379903	1953.208374	606.2036856	1.563517661	NaN	NaN	NaN	NaN	NaN	8.5, S
'20-Sep-2022 13:00:00'	-3.208333333	1	18.85	NaN	18.43250361	28.71710444	94.62861267	7.795740535	2076.904154	1953.152332	607.997411	1.559558006	NaN	NaN	NaN	NaN	NaN	8.5, S
'20-Sep-2022 14:00:00'	-3.166666667	1	NaN	NaN	18.43297729	28.71714432	94.71734333	7.794836368	2076.428405	1953.096289	609.6695026	1.555552847	NaN	NaN	NaN	NaN	NaN	8.5, S
'20-Sep-2022 15:00:00'	-3.125	1	NaN	NaN	18.43643014	28.71704958	94.6699355	7.793932202	2075.952656	1953.040246	611.4196104	1.551589183	NaN	NaN	NaN	NaN	NaN	8.5, S
'20-Sep-2022 16:00:00'	-3.083333333	1	18.8	NaN	18.44977389	28.71681972	94.75121783	7.793028035	2075.476907	1952.984204	613.4181977	1.547751808	NaN	NaN	NaN	NaN	NaN	8.5, S
'20-Sep-2022 17:00:00'	-3.041666667	1	NaN	NaN	18.46771861	28.71657278	94.72116083	7.792123868	2075.001158	1952.928161	615.5388268	1.543973957	NaN	NaN	NaN	NaN	NaN	8.5, S
'20-Sep-2022 18:00:00'	-3	1	NaN	NaN	18.48754734	28.71652045	94.65953017	7.791219702	2074.525409	1952.872118	617.7186889	1.540219602	NaN	NaN	NaN	NaN	NaN	8.5, S
'20-Sep-2022 19:00:00'	-2.958333333	1	NaN	NaN	18.50741253	28.7164883	94.63464733	7.790315535	2074.04966	1952.816076	619.9097358	1.536468175	NaN	NaN	NaN	NaN	NaN	8.5, S
'20-Sep-2022 20:00:00'	-2.916666667	1	NaN	NaN	18.52765972	28.71661444	94.63380817	7.789411368	2073.573911	1952.760033	622.1227961	1.532722271	NaN	NaN	NaN	NaN	NaN	8.5, S
'20-Sep-2022 21:00:00'	-2.875	1	NaN	NaN	18.54997003	28.71679804	94.59913317	7.788507202	2073.098162	1952.70399	624.3984357	1.529003702	NaN	NaN	NaN	NaN	NaN	8.5, S
'20-Sep-2022 22:00:00'	-2.833333333	1	NaN	NaN	18.56700808	28.71713621	94.52107517	7.787603035	2072.622413	1952.647948	626.5549705	1.525221538	NaN	NaN	NaN	NaN	NaN	8.5, S
'20-Sep-2022 23:00:00'	-2.791666667	1	NaN	NaN	18.58261528	28.71753528	94.60709733	7.786698868	2072.146664	1952.591905	628.6862901	1.521424039	NaN	NaN	NaN	NaN	NaN	8.5, S
'21-Sep-2022 00:00:00'	-2.75	1	NaN	NaN	18.59880924	28.71794342	94.6897025	7.785794702	2071.670915	1952.535862	630.8421573	1.517636524	NaN	NaN	NaN	NaN	NaN	8.5, S
'21-Sep-2022 01:00:00'	-2.708333333	1	NaN	NaN	18.61428412	28.71834847	94.72734067	7.784890535	2071.195166	1952.47982	632.9895534	1.513843201	NaN	NaN	NaN	NaN	NaN	8.5, S
'21-Sep-2022 02:00:00'	-2.666666667	1	NaN	NaN	18.62912583	28.71871667	94.830287	7.783986368	2070.719417	1952.423777	635.1300055	1.510045552	NaN	NaN	NaN	NaN	NaN	8.5, S
'21-Sep-2022 03:00:00'	-2.625	1	NaN	NaN	18.64513417	28.71911653	94.8551475	7.783082202	2070.243668	1952.367734	637.3102868	1.506264723	NaN	NaN	NaN	NaN	NaN	8.5, S
'21-Sep-2022 04:00:00'	-2.583333333	1	NaN	NaN	18.65851504	28.71952396	94.85200133	7.782178035	2069.767919	1952.311692	639.4335397	1.502454821	NaN	NaN	NaN	NaN	NaN	8.5, S
'21-Sep-2022 05:00:00'	-2.541666667	1	NaN	NaN	18.67368	28.71991583	94.8179245	7.781273868	2069.29217	1952.255649	641.6117297	1.498669832	NaN	NaN	NaN	NaN	NaN	8.5, S
'21-Sep-2022 06:00:00'	-2.5	1	18.58333333	NaN	18.68718515	28.72031961	94.819409	7.780369702	2068.816421	1952.199606	643.7573669	1.494867579	NaN	NaN	NaN	NaN	NaN	8.5, S
'21-Sep-2022 07:00:00'	-2.458333333	1	18.50833333	NaN	18.7003649	28.72073593	94.85697033	7.779465535	2068.340672	1952.143564	645.9044842	1.491064317	NaN	NaN	NaN	NaN	NaN	8.5, S
'21-Sep-2022 08:00:00'	-2.416666667	1	18.50833333	NaN	18.71248861	28.72115222	94.89734217	7.778561368	2067.864923	1952.087521	648.0339915	1.487251364	NaN	NaN	NaN	NaN	NaN	8.5, S
'21-Sep-2022 09:00:00'	-2.375	1	18.5	NaN	18.72349438	28.72161264	94.935787	7.777657202	2067.389174	1952.031478	650.1448112	1.483427527	NaN	NaN	NaN	NaN	NaN	8.5, S
'21-Sep-2022 10:00:00'	-2.333333333	1	18.60833333	NaN	18.73099861	28.72214917	94.95553917	7.776753035	2066.913425	1951.975436	652.1753653	1.479563697	NaN	NaN	NaN	NaN	NaN	8.5, S
'21-Sep-2022 11:00:00'	-2.291666667	1	18.76666667	NaN	18.73845861	28.72263167	95.00385783	7.775848868	2066.437676	1951.919393	654.2128535	1.475703256	NaN	NaN	NaN	NaN	NaN	8.5, S
'21-Sep-2022 12:00:00'	-2.25	1	18.76666667	NaN	18.74553736	28.72315084	95.0423975	7.774944702	2065.961927	1951.86335	656.2499867	1.471841134	NaN	NaN	NaN	NaN	NaN	8.5, S
'21-Sep-2022 13:00:00'	-2.208333333	1	18.9	NaN	18.74985789	28.72366343	95.0594625	7.774040535	2065.486178	1951.807308	658.2237828	1.467949227	NaN	NaN	NaN	NaN	NaN	8.5, S
'21-Sep-2022 14:00:00'	-2.166666667	1	18.85	NaN	18.75462813	28.72401727	95.03619283	7.772573868	2065.010429	1951.751265	660.2154297	1.464067948	NaN	NaN	NaN	NaN	2056.501137	8.5, S
'21-Sep-2022 15:00:00'	-2.125	1	18.91875	NaN	18.76431096	28.72434635	95.09258867	7.771107202	2064.53468	1951.695222	662.3447631	1.460249392	NaN	NaN	NaN	NaN	NaN	8.5, S
'21-Sep-2022 16:00:00'	-2.083333333	1	18.86153846	NaN	18.77596981	28.72469889	94.9693085	7.769640535	2064.058931	1951.63918	664.5361858	1.4564576	NaN	NaN	NaN	NaN	NaN	8.5, S
'21-Sep-2022 17:00:00'	-2.041666667	1	18.98571429	NaN	18.78914903	28.72511476	94.818664	7.768173868	2063.583182	1951.583137	666.7788034	1.452686615	NaN	NaN	NaN	NaN	NaN	8.5, S
'21-Sep-2022 18:00:00'	-2	1	18.82857143	NaN	18.80087472	28.72559663	94.81080233	7.766707202	2063.107433	1951.527094	668.9940696	1.448900765	NaN	NaN	NaN	NaN	NaN	8.5, S
'21-Sep-2022 19:00:00'	-1.958333333	1	18.87	NaN	18.81352161	28.72607535	94.8235845	7.765240535	2062.631684	1951.471052	671.2438348	1.445129287	NaN	NaN	NaN	NaN	NaN	8.5, S
'21-Sep-2022 20:00:00'	-1.916666667	1	18.8047619	NaN	18.8247337	28.72658552	94.82667117	7.764040535	2062.155935	1951.415009	673.4659779	1.441343636	NaN	NaN	NaN	NaN	NaN	8.5, S
'21-Sep-2022 21:00:00'	-1.875	1	18.76	NaN	18.83754101	28.72705225	94.8266325	7.762840535	2061.680186	1951.358966	675.7401911	1.43758086	NaN	NaN	NaN	NaN	NaN	8.5, S
'21-Sep-2022 22:00:00'	-1.833333333	1	18.6625	NaN	18.84954903	28.72752382	94.8013725	7.761873868	2061.204437	1951.302924	678.0033311	1.433811841	NaN	NaN	NaN	NaN	NaN	8.5, S
'21-Sep-2022 23:00:00'	-1.791666667	1	18.6	NaN	18.86270891	28.72797354	94.83918167	7.760907202	2060.728688	1951.246881	680.307433	1.430060151	NaN	NaN	NaN	NaN	NaN	8.5, S
'22-Sep-2022 00:00:00'	-1.75	1	18.59583333	NaN	18.87505534	28.72844972	94.81509983	7.759940535	2060.252939	1951.190838	682.6004791	1.426301862	NaN	NaN	NaN	NaN	NaN	8.5, S
'22-Sep-2022 01:00:00'	-1.708333333	1	18.56363636	NaN	18.88803194	28.72886417	94.818335	7.758973868	2059.77719	1951.134796	684.9200126	1.422555116	NaN	NaN	NaN	NaN	NaN	8.5, S
'22-Sep-2022 02:00:00'	-1.666666667	1	18.55	NaN	18.89611111	28.72941083	94.87131867	7.758007202	2059.301441	1951.078753	687.1190913	1.418752226	NaN	NaN	NaN	NaN	NaN	8.5, S
'22-Sep-2022 03:00:00'	-1.625	1	18.58181818	NaN	18.9028073	28.72996039	94.83068117	7.757040535	2058.825692	1951.02271	689.2903437	1.414936463	NaN	NaN	NaN	NaN	NaN	8.5, S
'22-Sep-2022 04:00:00'	-1.583333333	1	18.66	NaN	18.9106425	28.73048194	94.780163	7.756690535	2058.349943	1950.966668	691.5019902	1.411138093	NaN	NaN	NaN	NaN	NaN	8.5, S
'22-Sep-2022 05:00:00'	-1.541666667	1	18.7	NaN	18.91737452	28.7310313	94.79212133	7.756340535	2057.874194	1950.910625	693.6937618	1.407329979	NaN	NaN	NaN	NaN	NaN	8.5, S
'22-Sep-2022 06:00:00'	-1.5	1	18.7	NaN	18.92440873	28.73156873	94.73915633	7.755990535	2057.398445	1950.854582	695.9034564	1.403529203	NaN	NaN	NaN	NaN	NaN	8.5, S
'22-Sep-2022 07:00:00'	-1.458333333	1	18.68461538	NaN	18.93339778	28.73205194	94.7077125	7.755640535	2056.922696	1950.79854	698.1760872	1.399755701	NaN	NaN	NaN	NaN	NaN	8.5, S
'22-Sep-2022 08:00:00'	-1.416666667	1	18.77333333	NaN	18.9429205	28.73251247	94.6476345	7.755290535	2056.446947	1950.742497	700.4733698	1.395992328	NaN	NaN	NaN	NaN	NaN	8.5, S
'22-Sep-2022 09:00:00'	-1.375	1	18.82	NaN	18.95164096	28.73297203	94.608212	7.754940535	2055.971198	1950.686454	702.7587687	1.392223128	NaN	NaN	NaN	NaN	NaN	8.5, S
'22-Sep-2022 10:00:00'	-1.333333333	1	18.805	NaN	18.95919361	28.733495	94.55952033	7.754720535	2055.495449	1950.630412	705.0230742	1.388443202	NaN	NaN	NaN	NaN	NaN	8.5, S
'22-Sep-2022 11:00:00'	-1.291666667	1	18.85	NaN	18.96694404	28.7339964	94.547468	7.754500535	2055.0197	1950.574369	707.3027329	1.384669519	NaN	NaN	NaN	NaN	NaN	8.5, S
'22-Sep-2022 12:00:00'	-1.25	1	18.88947368	NaN	18.97706366	28.73441746	94.58959717	7.754280535	2054.543951	1950.518326	709.6576381	1.380928143	NaN	NaN	NaN	NaN	NaN	8.5, S
'22-Sep-2022 13:00:00'	-1.208333333	1	18.83846154	NaN	18.98699889	28.73480444	94.5206675	7.754060535	2054.068202	1950.462284	712.0174956	1.377188603	NaN	NaN	NaN	NaN	NaN	8.5, S
'22-Sep-2022 14:00:00'	-1.166666667	1	18.67857143	NaN	18.99311347	28.73510115	94.51634433	7.753840535	2053.592453	1950.406241	714.2788997	1.373408927	NaN	NaN	NaN	NaN	2064.403297	8.5, S
'22-Sep-2022 15:00:00'	-1.125	1	18.61333333	NaN	19.00357167	28.73543033	94.54946833	7.745240535	2053.116704	1950.350198	716.6737517	1.369683487	NaN	NaN	NaN	NaN	NaN	8.5, S
'22-Sep-2022 16:00:00'	-1.083333333	1	18.56666667	NaN	19.01202087	28.73572739	95.44765817	7.751190535	2052.640955	1950.294155	719.0220574	1.3659386	NaN	NaN	NaN	NaN	NaN	8.5, S
'22-Sep-2022 17:00:00'	-1.041666667	1	18.64210526	NaN	19.02241639	28.73616972	95.1085255	7.757140535	2052.165206	1950.238113	721.4388804	1.362218746	NaN	NaN	NaN	NaN	NaN	8.5, S
'22-Sep-2022 18:00:00'	-1	1	18.30833333	NaN	19.02958583	28.73668417	94.69255633	7.757140535	2051.689457	1950.18207	723.7760729	1.358464355	NaN	NaN	NaN	NaN	NaN	8.5, S
'22-Sep-2022 19:00:00'	-0.958333333	1	18.29166667	NaN	19.03759831	28.73715155	94.2771595	7.758240535	2051.213708	1950.126027	726.1471156	1.35472408	NaN	NaN	NaN	NaN	NaN	8.5, S
'22-Sep-2022 20:00:00'	-0.916666667	1	18.225	NaN	19.04655111	28.73762444	94.25672083	7.759340535	2050.737959	1950.069985	728.5559858	1.350998518	NaN	NaN	NaN	NaN	NaN	8.5, S
'22-Sep-2022 21:00:00'	-0.875	1	18.3	NaN	19.05700028	28.73808556	94.18292267	7.760440535	2050.26221	1950.013942	731.0186623	1.34729427	NaN	NaN	NaN	NaN	NaN	8.5, S
'22-Sep-2022 22:00:00'	-0.833333333	1	18.55555556	NaN	19.06204635	28.73863258	94.53450967	7.760807202	2049.786461	1949.957899	733.3383447	1.343530387	NaN	NaN	2049.786461	1949.957899	NaN	8.5, S
'22-Sep-2022 23:00:00'	-0.791666667	1	18.85833333	NaN	19.0653225	28.73917972	95.648281	7.761173868	2049.310712	1949.901857	735.6173075	1.33975001	NaN	NaN	NaN	NaN	NaN	8.5, S
'23-Sep-2022 00:00:00'	-0.75	1	19.725	NaN	19.06823667	28.73976972	95.99274867	7.761540535	2048.834963	1949.845814	737.896764	1.33596911	NaN	NaN	NaN	NaN	NaN	8.5, S
'23-Sep-2022 01:00:00'	-0.708333333	1	20.18333333	NaN	19.07033315	28.74039298	96.11766417	7.761740535	2048.359214	1949.789771	740.1632642	1.33218256	NaN	NaN	NaN	NaN	NaN	8.5, S
'23-Sep-2022 02:00:00'	-0.666666667	1	20.4	NaN	19.075345	28.74099278	96.24046367	7.761940535	2047.883465	1949.733729	742.5244978	1.328433976	NaN	NaN	NaN	NaN	NaN	8.5, S
'23-Sep-2022 03:00:00'	-0.625	1	20.5	NaN	19.08401806	28.74155722	96.39632383	7.762140535	2047.407716	1949.677686	745.0028364	1.324731936	NaN	NaN	NaN	NaN	NaN	8.5, S
'23-Sep-2022 04:00:00'	-0.583333333	1	20.56666667	NaN	19.10085239	28.74189634	96.39893083	7.761273868	2046.931967	1949.621643	747.7278833	1.32112981	NaN	NaN	NaN	NaN	NaN	8.5, S
'23-Sep-2022 05:00:00'	-0.541666667	1	20.6	NaN	19.12369972	28.74214722	96.39749017	7.760407202	2046.456218	1949.565601	750.6412043	1.317601372	NaN	NaN	NaN	NaN	NaN	8.5, S
'23-Sep-2022 06:00:00'	-0.5	1	20.55	NaN	19.1472375	28.742405	96.54368883	7.759540535	2045.980469	1949.509558	753.5891472	1.314084476	NaN	NaN	NaN	NaN	NaN	8.5, S
'23-Sep-2022 07:00:00'	-0.458333333	1	20.54583333	NaN	19.17097612	28.74268174	96.41232633	7.759907202	2045.50472	1949.453515	756.557705	1.310573394	NaN	NaN	NaN	NaN	NaN	8.5, S
'23-Sep-2022 08:00:00'	-0.416666667	1	20.51304348	NaN	19.194855	28.74295306	96.415914	7.760273868	2045.028971	1949.397473	759.5447727	1.30706767	NaN	NaN	NaN	NaN	NaN	8.5, S
'23-Sep-2022 09:00:00'	-0.375	1	20.5625	NaN	19.21714972	28.74329694	96.41447033	7.760640535	2044.553222	1949.34143	762.5004265	1.303546852	NaN	NaN	2044.553222	1949.34143	NaN	8.5, S
'23-Sep-2022 10:00:00'	-0.333333333	1	20.7125	NaN	19.2385882	28.74366152	96.63558033	7.761073868	2045.156765	1948.781648	756.4394622	1.313964549	NaN	NaN	NaN	NaN	NaN	8.5, S
'23-Sep-2022 11:00:00'	-0.291666667	1	20.84166667	NaN	19.25884083	28.74409194	96.696203	7.761507202	2045.760309	1948.221867	750.4166471	1.324401814	NaN	NaN	NaN	NaN	NaN	8.5, S
'23-Sep-2022 12:00:00'	-0.25	1	20.975	NaN	19.27838722	28.74454861	96.80748533	7.761940535	2046.363852	1947.662085	744.4450417	1.334863986	NaN	NaN	NaN	NaN	NaN	8.5, S
'23-Sep-2022 13:00:00'	-0.208333333	1	20.995	NaN	19.29873268	28.74496958	96.56182267	7.762490535	2046.967395	1947.102303	738.5666563	1.34536872	NaN	NaN	NaN	NaN	NaN	8.5, S
'23-Sep-2022 14:00:00'	-0.166666667	1	20.58125	NaN	19.34908111	28.74559444	97.32905017	7.763040535	2047.570938	1946.542521	733.6254048	1.356256007	NaN	NaN	NaN	NaN	2055.609071	8.5, S
'23-Sep-2022 15:00:00'	-0.125	1	20.21333333	NaN	19.41944861	28.74623722	97.55193317	7.764640535	2048.174481	1945.98274	729.3148816	1.367415167	NaN	NaN	NaN	NaN	NaN	8.5, S
'23-Sep-2022 16:00:00'	-0.083333333	1	19.99545455	NaN	19.48985337	28.7468573	97.48044417	7.771740535	2048.778024	1945.422958	725.0545195	1.378613148	NaN	NaN	NaN	NaN	NaN	8.5, S
'23-Sep-2022 17:00:00'	-0.041666667	1	20.4375	NaN	19.55782972	28.74752917	97.44547417	7.771340535	2049.381567	1944.863176	720.7750803	1.3898194	NaN	NaN	NaN	NaN	NaN	8.5, S
'23-Sep-2022 18:00:00'	0	1	20.72083333	NaN	19.60943961	28.72462936	97.7327875	7.774840535	2049.985111	1944.303394	715.6713708	1.401110692	NaN	NaN	2049.985111	1944.303394	NaN	8.5, S
'23-Sep-2022 19:00:00'	0.041666667	1	20.8875	NaN	19.62358146	28.71500449	97.82442433	7.778940535	2048.995347	1943.729342	717.6834798	1.397321728	NaN	NaN	NaN	NaN	NaN	8.5, S
'23-Sep-2022 20:00:00'	0.083333333	1	20.92083333	NaN	19.63296778	28.71610722	97.91083133	7.775640535	2048.005584	1943.15529	719.7585089	1.39336796	NaN	NaN	NaN	NaN	NaN	8.5, S
'23-Sep-2022 21:00:00'	0.125	1	20.9625	NaN	19.650265	28.71695278	97.584434	7.777040535	2047.015821	1942.581238	722.062804	1.389515416	NaN	NaN	NaN	NaN	NaN	8.5, S
'23-Sep-2022 22:00:00'	0.166666667	1	20.95416667	NaN	19.67312648	28.71758563	97.933619	7.779140535	2046.026057	1942.007186	724.5322655	1.385735212	NaN	NaN	NaN	NaN	NaN	8.5, S
'23-Sep-2022 23:00:00'	0.208333333	1	20.88333333	NaN	19.69718167	28.71823333	98.00424983	7.779223868	2045.036294	1941.433134	727.0475981	1.381972547	NaN	NaN	2045.036294	1941.433134	NaN	8.5, S
'24-Sep-2022 00:00:00'	0.25	1	20.8875	NaN	19.7210775	28.71886556	98.05127233	7.779307202	2045.219823	1941.462741	726.9674966	1.383672605	NaN	NaN	NaN	NaN	NaN	8.5, S
'24-Sep-2022 01:00:00'	0.291666667	1	20.87083333	NaN	19.74484972	28.71951489	98.16007467	7.779390535	2045.403352	1941.492347	726.884646	1.385372051	NaN	NaN	NaN	NaN	NaN	8.5, S
'24-Sep-2022 02:00:00'	0.333333333	1	20.85833333	NaN	19.76817583	28.72014361	98.24993433	7.779473868	2045.586881	1941.521954	726.7891801	1.387067389	NaN	NaN	NaN	NaN	NaN	8.5, S
'24-Sep-2022 03:00:00'	0.375	1	20.8875	NaN	19.79076472	28.7208	98.24054567	7.779557202	2045.77041	1941.55156	726.6736557	1.388754603	NaN	NaN	NaN	NaN	NaN	8.5, S
'24-Sep-2022 04:00:00'	0.416666667	1	20.8125	NaN	19.81310085	28.72147099	97.87373483	7.779640535	2045.953939	1941.581167	726.5516693	1.390439625	NaN	NaN	NaN	NaN	NaN	8.5, S
'24-Sep-2022 05:00:00'	0.458333333	1	20.84166667	NaN	19.83434472	28.72214583	98.13475567	7.779640535	2046.137468	1941.610774	726.3991014	1.392112429	NaN	NaN	NaN	NaN	NaN	8.5, S
'24-Sep-2022 06:00:00'	0.5	1	20.8	NaN	19.85456111	28.72286056	98.0780875	7.779640535	2046.320997	1941.64038	726.2184576	1.393773375	NaN	NaN	NaN	NaN	NaN	8.5, S
'24-Sep-2022 07:00:00'	0.541666667	1	20.8	NaN	19.87456011	28.72353455	98.06138833	7.779640535	2046.504526	1941.669987	726.0314182	1.395433041	NaN	NaN	NaN	NaN	NaN	8.5, S
'24-Sep-2022 08:00:00'	0.583333333	1	20.82083333	NaN	19.893759	28.72423352	97.8608	7.779640535	2046.688055	1941.699594	725.8225514	1.397083687	NaN	NaN	NaN	NaN	NaN	8.5, S
'24-Sep-2022 09:00:00'	0.625	1	20.8125	NaN	19.91252222	28.72493694	98.14003517	7.779640535	2046.871584	1941.7292	725.6018923	1.398729905	NaN	NaN	NaN	NaN	NaN	8.5, S
'24-Sep-2022 10:00:00'	0.666666667	1	20.8952381	NaN	19.93010958	28.72563324	98.1930935	7.779640535	2047.055112	1941.758807	725.3481777	1.400362817	NaN	NaN	NaN	NaN	NaN	8.5, S
'24-Sep-2022 11:00:00'	0.708333333	1	20.98095238	NaN	19.94756583	28.72634111	97.94178183	7.779728035	2047.238641	1941.788414	725.0915017	1.401994869	NaN	NaN	NaN	NaN	NaN	8.5, S
'24-Sep-2022 12:00:00'	0.75	1	20.64210526	NaN	19.96509417	28.72704639	98.26608183	7.779815535	2047.42217	1941.81802	724.837396	1.40362867	NaN	NaN	NaN	NaN	NaN	8.5, S
'24-Sep-2022 13:00:00'	0.791666667	1	20.175	NaN	19.98222563	28.72775211	98.05058667	7.779903035	2047.605699	1941.847627	724.5725775	1.405258485	NaN	NaN	NaN	NaN	NaN	8.5, S
'24-Sep-2022 14:00:00'	0.833333333	1	19.40833333	NaN	20.00157889	28.7283925	98.15097933	7.779990535	2047.789228	1941.877234	724.3703259	1.406916895	NaN	NaN	NaN	NaN	NaN	8.5, S
'24-Sep-2022 15:00:00'	0.875	1	19.375	NaN	20.0229025	28.72899194	98.09431733	7.780078035	2047.972757	1941.90684	724.2238686	1.408600675	NaN	NaN	2047.972757	1941.90684	NaN	8.5, S
'24-Sep-2022 16:00:00'	0.916666667	1	19.2125	NaN	20.03820393	28.72975084	98.04573433	7.780165535	2048.030345	1942.009443	724.9555817	1.408407991	NaN	NaN	NaN	NaN	NaN	8.5, S
'24-Sep-2022 17:00:00'	0.958333333	1	19.18666667	NaN	20.04573194	28.73072083	97.7888275	7.780253035	2048.087932	1942.112046	725.4704524	1.408118284	NaN	NaN	NaN	NaN	NaN	8.5, S
'24-Sep-2022 18:00:00'	1	1	18.97916667	NaN	20.04150806	28.73188694	97.81226933	7.780340535	2048.145519	1942.214649	725.6545479	1.407683126	NaN	NaN	NaN	NaN	NaN	8.5, S
'24-Sep-2022 19:00:00'	1.041666667	1	19.30833333	NaN	20.03647051	28.73299017	97.66624133	7.780353035	2048.203107	1942.317251	725.8144288	1.407238777	NaN	NaN	NaN	NaN	NaN	8.5, S
'24-Sep-2022 20:00:00'	1.083333333	1	19.93913043	NaN	20.03118056	28.73405361	97.60532067	7.780365535	2048.260694	1942.419854	725.9664726	1.406791847	NaN	NaN	NaN	NaN	NaN	8.5, S
'24-Sep-2022 21:00:00'	1.125	1	20.45416667	NaN	20.02506722	28.73512444	97.08260383	7.780378035	2048.318282	1942.522457	726.0952457	1.406334882	NaN	NaN	NaN	NaN	NaN	8.5, S
'24-Sep-2022 22:00:00'	1.166666667	1	20.67916667	NaN	20.0189441	28.73614129	97.379312	7.780390535	2048.375869	1942.62506	726.2228269	1.40587845	NaN	NaN	NaN	NaN	NaN	8.5, S
'24-Sep-2022 23:00:00'	1.208333333	1	20.75	NaN	20.01864556	28.73698278	97.4490445	7.780403035	2048.433456	1942.727662	726.5133289	1.405494909	NaN	NaN	NaN	NaN	NaN	8.5, S
'25-Sep-2022 00:00:00'	1.25	1	20.33333333	NaN	20.02792583	28.73764889	97.27249717	7.780415535	2048.491044	1942.830265	727.0739923	1.405229978	NaN	NaN	NaN	NaN	NaN	8.5, S
'25-Sep-2022 01:00:00'	1.291666667	1	19.9	NaN	20.04551067	28.73809157	97.23790283	7.780428035	2048.548631	1942.932868	727.8681338	1.405068682	NaN	NaN	NaN	NaN	NaN	8.5, S
'25-Sep-2022 02:00:00'	1.333333333	1	19.91666667	NaN	20.06481167	28.73848833	97.384335	7.780440535	2048.606219	1943.035471	728.7112841	1.404928919	NaN	NaN	NaN	NaN	NaN	8.5, S
'25-Sep-2022 03:00:00'	1.375	1	20.52916667	NaN	20.08499306	28.73880417	97.30217583	7.779740535	2048.663806	1943.138074	729.5790594	1.404800886	NaN	NaN	NaN	NaN	NaN	8.5, S
'25-Sep-2022 04:00:00'	1.416666667	1	20.72916667	NaN	20.09929408	28.73931465	97.02800733	7.779040535	2048.721394	1943.240676	730.2828774	1.404599155	NaN	NaN	NaN	NaN	NaN	8.5, S
'25-Sep-2022 05:00:00'	1.458333333	1	20.76666667	NaN	20.10571583	28.74000528	97.06495233	7.778340535	2048.778981	1943.343279	730.7648123	1.404299392	NaN	NaN	NaN	NaN	NaN	8.5, S
'25-Sep-2022 06:00:00'	1.5	1	20.87222222	NaN	20.11300917	28.74066639	96.95845	7.777640535	2048.836568	1943.445882	731.2715146	1.404010627	NaN	NaN	NaN	NaN	NaN	8.5, S
'25-Sep-2022 07:00:00'	1.541666667	1	20.9	NaN	20.12934902	28.74107423	96.8588275	7.776940535	2048.894156	1943.548485	732.0335195	1.403835067	NaN	NaN	NaN	NaN	NaN	8.5, S
'25-Sep-2022 08:00:00'	1.583333333	1	20.85833333	NaN	20.14767772	28.74141532	96.7236685	7.776240535	2048.951743	1943.651087	732.8521645	1.403684619	NaN	NaN	NaN	NaN	NaN	8.5, S
'25-Sep-2022 09:00:00'	1.625	1	20.31666667	NaN	20.16586194	28.7418275	96.38931867	7.775540535	2049.009331	1943.75369	733.6687564	1.403531785	NaN	NaN	NaN	NaN	NaN	8.5, S
'25-Sep-2022 10:00:00'	1.666666667	1	19.51666667	NaN	20.18519494	28.74220112	96.2607335	7.774840535	2049.066918	1943.856293	734.5185328	1.403393534	NaN	NaN	NaN	NaN	NaN	8.5, S
'25-Sep-2022 11:00:00'	1.708333333	1	19.4	NaN	20.20514485	28.742539	96.5092745	7.774328035	2049.124505	1943.958896	735.3863238	1.403263346	NaN	NaN	NaN	NaN	NaN	8.5, S
'25-Sep-2022 12:00:00'	1.75	1	19.30833333	NaN	20.22551972	28.74284639	96.38964767	7.773815535	2049.182093	1944.061499	736.2667431	1.403138827	NaN	NaN	NaN	NaN	NaN	8.5, S
'25-Sep-2022 13:00:00'	1.791666667	1	19.175	NaN	20.23792893	28.74339045	96.21001117	7.773303035	2049.23968	1944.164101	736.9225139	1.40291437	NaN	NaN	NaN	NaN	NaN	8.5, S
'25-Sep-2022 14:00:00'	1.833333333	1	19.24166667	NaN	20.23966306	28.7442	96.03461217	7.772790535	2049.297268	1944.266704	737.2754291	1.402556396	NaN	NaN	NaN	NaN	NaN	8.5, S
'25-Sep-2022 15:00:00'	1.875	1	19.125	NaN	20.23915806	28.74494694	95.84921867	7.772278035	2049.354855	1944.369307	737.5627502	1.402171688	NaN	NaN	NaN	NaN	NaN	8.5, S
'25-Sep-2022 16:00:00'	1.916666667	1	19.14166667	NaN	20.23795281	28.74568006	95.63268833	7.771765535	2049.412442	1944.47191	737.8297274	1.401778597	NaN	NaN	NaN	NaN	NaN	8.5, S
'25-Sep-2022 17:00:00'	1.958333333	1	19.075	NaN	20.23557	28.74642	95.63371867	7.771253035	2049.47003	1944.574512	738.0629208	1.401371068	NaN	NaN	NaN	NaN	NaN	8.5, S
'25-Sep-2022 18:00:00'	2	1	19.10833333	NaN	20.23385706	28.74710139	95.5309025	7.770740535	2049.527617	1944.677115	738.3145163	1.400972407	NaN	NaN	NaN	NaN	NaN	8.5, S
'25-Sep-2022 19:00:00'	2.041666667	1	19.09166667	NaN	20.23201215	28.74779407	95.20702767	7.770828035	2049.585205	1944.779718	738.5626045	1.400572068	NaN	NaN	NaN	NaN	NaN	8.5, S
'25-Sep-2022 20:00:00'	2.083333333	1	19.01666667	NaN	20.23020166	28.74844294	95.40347567	7.770915535	2049.642792	1944.882321	738.8110047	1.400172662	NaN	NaN	NaN	NaN	NaN	8.5, S
'25-Sep-2022 21:00:00'	2.125	1	18.8	NaN	20.22739694	28.74909749	95.2397195	7.771003035	2049.70038	1944.984924	739.0308502	1.399761084	NaN	NaN	NaN	NaN	NaN	8.5, S
'25-Sep-2022 22:00:00'	2.166666667	1	18.83333333	NaN	20.22690365	28.74966433	95.06492717	7.771090535	2049.757967	1945.087526	739.3160891	1.399378755	NaN	NaN	NaN	NaN	NaN	8.5, S
'25-Sep-2022 23:00:00'	2.208333333	1	19.9	NaN	20.22579056	28.75026	94.93255233	7.771178035	2049.815554	1945.190129	739.5840328	1.398988593	NaN	NaN	NaN	NaN	NaN	8.5, S
'26-Sep-2022 00:00:00'	2.25	1	20.2	NaN	20.22441778	28.75077861	94.790571	7.771265535	2049.873142	1945.292732	739.8431884	1.398596105	NaN	NaN	NaN	NaN	NaN	8.5, S
'26-Sep-2022 01:00:00'	2.291666667	1	20.60833333	NaN	20.21768789	28.75144085	94.69505067	7.771353035	2049.930729	1945.395335	739.9498801	1.398136678	NaN	NaN	NaN	NaN	NaN	8.5, S
'26-Sep-2022 02:00:00'	2.333333333	1	20.71666667	NaN	20.21134639	28.75200111	94.9569355	7.771440535	2049.988317	1945.497937	740.0660257	1.397683142	NaN	NaN	NaN	NaN	NaN	8.5, S
'26-Sep-2022 03:00:00'	2.375	1	20.84166667	NaN	20.22121556	28.75222889	95.051907	7.771178035	2050.045904	1945.60054	740.6459726	1.397431239	NaN	NaN	NaN	NaN	NaN	8.5, S
'26-Sep-2022 04:00:00'	2.416666667	1	20.85833333	NaN	20.23898146	28.75229831	94.87391167	7.770915535	2050.103491	1945.703143	741.452571	1.397277591	NaN	NaN	NaN	NaN	NaN	8.5, S
'26-Sep-2022 05:00:00'	2.458333333	1	20.9	NaN	20.26041472	28.75236139	94.991282	7.770653035	2050.161079	1945.805746	742.3663542	1.397169001	NaN	NaN	NaN	NaN	NaN	8.5, S
'26-Sep-2022 06:00:00'	2.5	1	20.9	NaN	20.28297333	28.75237528	94.6519565	7.770390535	2050.218666	1945.908349	743.3129767	1.397074865	NaN	NaN	NaN	NaN	NaN	8.5, S
'26-Sep-2022 07:00:00'	2.541666667	1	20.93333333	NaN	20.30600535	28.75237296	94.7561395	7.770128035	2050.276254	1946.010951	744.2741632	1.39698688	NaN	NaN	NaN	NaN	NaN	8.5, S
'26-Sep-2022 08:00:00'	2.583333333	1	20.675	NaN	20.32934444	28.75238861	94.75607867	7.769865535	2050.333841	1946.113554	745.2457305	1.396902664	NaN	NaN	NaN	NaN	NaN	8.5, S
'26-Sep-2022 09:00:00'	2.625	1	19.69090909	NaN	20.35266648	28.75238781	94.70728317	7.769603035	2050.391428	1946.216157	746.2176326	1.396818604	NaN	NaN	NaN	NaN	NaN	8.5, S
'26-Sep-2022 10:00:00'	2.666666667	1	NaN	NaN	20.37538394	28.75235634	94.85586767	7.769340535	2050.449016	1946.31876	747.1724535	1.396727633	NaN	NaN	NaN	NaN	NaN	8.5, S
'26-Sep-2022 11:00:00'	2.708333333	1	NaN	NaN	20.39793	28.75230861	94.69011483	7.769618313	2050.506603	1946.421362	748.1230594	1.396634909	NaN	NaN	NaN	NaN	NaN	8.5, S
'26-Sep-2022 12:00:00'	2.75	1	NaN	NaN	20.41770861	28.75235111	94.808838	7.76989609	2050.564191	1946.523965	748.9953983	1.396507418	NaN	NaN	NaN	NaN	NaN	8.5, S
'26-Sep-2022 13:00:00'	2.791666667	1	NaN	NaN	20.42042591	28.75272012	94.65551033	7.770173868	2050.621778	1946.626568	749.3749722	1.396166935	NaN	NaN	NaN	NaN	NaN	8.5, S
'26-Sep-2022 14:00:00'	2.833333333	1	NaN	NaN	20.41623647	28.7532417	94.561737	7.770451646	2050.679366	1946.729171	749.555253	1.395740038	NaN	NaN	NaN	NaN	NaN	8.5, S
'26-Sep-2022 15:00:00'	2.875	1	NaN	NaN	20.41204702	28.75376327	94.15498167	7.770729424	2050.736953	1946.831774	749.7355997	1.395313207	NaN	NaN	NaN	NaN	NaN	8.5, S
'26-Sep-2022 16:00:00'	2.916666667	1	NaN	NaN	20.40785758	28.75428485	94.202375	7.771007202	2050.79454	1946.934376	749.9160123	1.394886443	NaN	NaN	NaN	NaN	NaN	8.5, S
'26-Sep-2022 17:00:00'	2.958333333	1	NaN	NaN	20.40185278	28.75459472	94.34035767	7.771284979	2050.852128	1947.036979	750.039451	1.394439642	NaN	NaN	NaN	NaN	2057.039833	8.5, S
'26-Sep-2022 18:00:00'	3	1	NaN	NaN	20.39395278	28.75513111	94.16343383	7.771562757	2050.909715	1947.139582	750.1115098	1.393967324	NaN	NaN	2050.909715	1947.139582	NaN	8.5, S
'26-Sep-2022 19:00:00'	3.041666667	1	NaN	NaN	20.38535324	28.75567352	94.1981055	7.771840535	2050.9135	1947.094892	749.5895818	1.394282186	NaN	NaN	NaN	NaN	NaN	8.5, S
'26-Sep-2022 20:00:00'	3.083333333	1	NaN	NaN	20.37628947	28.7561892	94.0478485	7.772118313	2050.917284	1947.050202	749.0539487	1.394591671	NaN	NaN	NaN	NaN	NaN	8.5, S
'26-Sep-2022 21:00:00'	3.125	1	NaN	NaN	20.36778524	28.75668301	93.99079933	7.77239609	2050.921069	1947.005513	748.5346701	1.394908292	NaN	NaN	NaN	NaN	NaN	8.5, S
'26-Sep-2022 22:00:00'	3.166666667	1	NaN	NaN	20.35926208	28.75710758	93.94794883	7.772673868	2050.924854	1946.960823	748.0139478	1.395225439	NaN	NaN	NaN	NaN	NaN	8.5, S
'26-Sep-2022 23:00:00'	3.208333333	1	NaN	NaN	20.35103722	28.757555	94.032421	7.772951646	2050.928638	1946.916133	747.5027209	1.395546054	NaN	NaN	NaN	NaN	NaN	8.5, S
'27-Sep-2022 00:00:00'	3.25	1	NaN	NaN	20.34497667	28.7578925	93.51762117	7.773229424	2050.932423	1946.871444	747.0530564	1.395894386	NaN	NaN	NaN	NaN	NaN	8.5, S
'27-Sep-2022 01:00:00'	3.291666667	1	NaN	NaN	20.33765211	28.75821437	93.93282767	7.773507202	2050.936207	1946.826754	746.5665056	1.396227421	NaN	NaN	NaN	NaN	NaN	8.5, S
'27-Sep-2022 02:00:00'	3.333333333	1	NaN	NaN	20.33019	28.75859167	93.83899067	7.773784979	2050.939992	1946.782064	746.0772723	1.396558238	NaN	NaN	NaN	NaN	NaN	8.5, S
'27-Sep-2022 03:00:00'	3.375	1	NaN	NaN	20.32235194	28.75897639	93.62982133	7.774062757	2050.943777	1946.737374	745.5775443	1.396884411	NaN	NaN	NaN	NaN	NaN	8.5, S
'27-Sep-2022 04:00:00'	3.416666667	1	NaN	NaN	20.31445406	28.75942213	93.58463433	7.774340535	2050.947561	1946.692685	745.0775185	1.397209262	NaN	NaN	NaN	NaN	NaN	8.5, S
'27-Sep-2022 05:00:00'	3.458333333	1	NaN	NaN	20.30485639	28.75995861	93.07666633	7.774618313	2050.951346	1946.647995	744.5299831	1.397512383	NaN	NaN	NaN	NaN	NaN	8.5, S
'27-Sep-2022 06:00:00'	3.5	1	NaN	NaN	20.2947039	28.76046685	93.45536283	7.77489609	2050.955131	1946.603305	743.9661957	1.397809046	NaN	NaN	NaN	NaN	NaN	8.5, S
'27-Sep-2022 07:00:00'	3.541666667	1	NaN	NaN	20.28967493	28.76087239	93.50943417	7.775173868	2050.958915	1946.558616	743.5499693	1.398169595	NaN	NaN	NaN	NaN	NaN	8.5, S
'27-Sep-2022 08:00:00'	3.583333333	1	NaN	NaN	20.29089306	28.76118556	93.5309455	7.775451646	2050.9627	1946.513926	743.3139391	1.398607689	NaN	NaN	NaN	NaN	NaN	8.5, S
'27-Sep-2022 09:00:00'	3.625	1	NaN	NaN	20.29665083	28.76145389	93.30261883	7.775729424	2050.966484	1946.469236	743.2091696	1.399101946	NaN	NaN	NaN	NaN	NaN	8.5, S
'27-Sep-2022 10:00:00'	3.666666667	1	NaN	NaN	20.31171404	28.76149326	93.5206025	7.776007202	2050.970269	1946.424546	743.3708304	1.399712795	NaN	NaN	NaN	NaN	NaN	8.5, S
'27-Sep-2022 11:00:00'	3.708333333	1	NaN	NaN	20.32943778	28.76152111	93.47020117	7.776284979	2050.974054	1946.379857	743.6097052	1.400356621	NaN	NaN	NaN	NaN	NaN	8.5, S
'27-Sep-2022 12:00:00'	3.75	1	NaN	NaN	20.34909028	28.76148639	93.07669567	7.776562757	2050.977838	1946.335167	743.9036395	1.401025038	NaN	NaN	NaN	NaN	NaN	8.5, S
'27-Sep-2022 13:00:00'	3.791666667	1	NaN	NaN	20.36268366	28.7616431	93.332673	7.776840535	2050.981623	1946.290477	744.0248547	1.401617247	NaN	NaN	NaN	NaN	NaN	8.5, S
'27-Sep-2022 14:00:00'	3.833333333	1	NaN	NaN	20.36867861	28.76209389	93.34925417	7.776944702	2050.985407	1946.245788	743.9303743	1.402113109	NaN	NaN	NaN	NaN	NaN	8.5, S
'27-Sep-2022 15:00:00'	3.875	1	NaN	NaN	20.36649222	28.76273139	93.22433667	7.777048868	2050.989192	1946.201098	743.6013991	1.402506472	NaN	NaN	NaN	NaN	NaN	8.5, S
'27-Sep-2022 16:00:00'	3.916666667	1	NaN	NaN	20.3609941	28.76345534	93.14650667	7.777153035	2050.992977	1946.156408	743.1779088	1.402858239	NaN	NaN	NaN	NaN	NaN	8.5, S
'27-Sep-2022 17:00:00'	3.958333333	1	NaN	NaN	20.35463573	28.76422853	92.971068	7.777257202	2050.996761	1946.111718	742.7305801	1.403198949	NaN	NaN	NaN	NaN	2066.464005	8.5, S
'27-Sep-2022 18:00:00'	4	1	NaN	NaN	20.34638774	28.76507047	93.10353133	7.777361368	2051.000546	1946.067029	742.2299187	1.403515741	NaN	NaN	2051.000546	1946.067029	NaN	8.5, S
'27-Sep-2022 19:00:00'	4.041666667	1	NaN	NaN	20.33869944	28.76584394	92.781661	7.777465535	2051.092877	1946.143142	741.9783866	1.403594458	NaN	NaN	NaN	NaN	NaN	8.5, S
'27-Sep-2022 20:00:00'	4.083333333	1	NaN	NaN	20.33042278	28.76656333	92.63399017	7.777569702	2051.185208	1946.219256	741.7088862	1.403666524	NaN	NaN	NaN	NaN	NaN	8.5, S
'27-Sep-2022 21:00:00'	4.125	1	NaN	NaN	20.32326361	28.76721583	92.98034833	7.777673868	2051.277538	1946.295369	741.4706813	1.403753038	NaN	NaN	NaN	NaN	NaN	8.5, S
'27-Sep-2022 22:00:00'	4.166666667	1	NaN	NaN	20.31500787	28.76795169	93.04180417	7.777778035	2051.369869	1946.371483	741.2022478	1.403825221	NaN	NaN	NaN	NaN	NaN	8.5, S
'27-Sep-2022 23:00:00'	4.208333333	1	NaN	NaN	20.30977083	28.76863944	93.1283005	7.777882202	2051.4622	1946.447597	741.0205479	1.403935006	NaN	NaN	NaN	NaN	NaN	8.5, S
'28-Sep-2022 00:00:00'	4.25	1	NaN	NaN	20.31134167	28.76922167	92.76624383	7.777986368	2051.554531	1946.52371	741.0343442	1.404129533	NaN	NaN	NaN	NaN	NaN	8.5, S
'28-Sep-2022 01:00:00'	4.291666667	1	NaN	NaN	20.31463662	28.76986	93.09419567	7.778090535	2051.646862	1946.599824	741.0991459	1.404344669	NaN	NaN	NaN	NaN	NaN	8.5, S
'28-Sep-2022 02:00:00'	4.333333333	1	NaN	NaN	20.32018417	28.77050583	93.07380367	7.778194702	2051.739192	1946.675937	741.2294136	1.404587428	NaN	NaN	NaN	NaN	NaN	8.5, S
'28-Sep-2022 03:00:00'	4.375	1	NaN	NaN	20.32485694	28.77111028	92.84685483	7.778298868	2051.831523	1946.752051	741.333592	1.404819892	NaN	NaN	NaN	NaN	NaN	8.5, S
'28-Sep-2022 04:00:00'	4.416666667	1	NaN	NaN	20.32866601	28.77163904	93.07382567	7.778403035	2051.923854	1946.828165	741.4113749	1.405042548	NaN	NaN	NaN	NaN	NaN	8.5, S
'28-Sep-2022 05:00:00'	4.458333333	1	NaN	NaN	20.33040444	28.772335	92.89874283	7.778507202	2052.016185	1946.904278	741.4321222	1.405238006	NaN	NaN	NaN	NaN	NaN	8.5, S
'28-Sep-2022 06:00:00'	4.5	1	NaN	NaN	20.33209167	28.77308694	93.00491517	7.778611368	2052.108516	1946.980392	741.4523999	1.405432257	NaN	NaN	NaN	NaN	NaN	8.5, S
'28-Sep-2022 07:00:00'	4.541666667	1	NaN	NaN	20.34437612	28.77361938	92.80117533	7.778715535	2052.200846	1947.056505	741.7761706	1.4057592	NaN	NaN	NaN	NaN	NaN	8.5, S
'28-Sep-2022 08:00:00'	4.583333333	1	NaN	NaN	20.359695	28.77413917	92.91579667	7.778819702	2052.293177	1947.132619	742.1879204	1.406123728	NaN	NaN	NaN	NaN	NaN	8.5, S
'28-Sep-2022 09:00:00'	4.625	1	NaN	NaN	20.37550833	28.77455722	92.95603	7.778923868	2052.385508	1947.208732	742.6123918	1.406495542	NaN	NaN	NaN	NaN	NaN	8.5, S
'28-Sep-2022 10:00:00'	4.666666667	1	NaN	NaN	20.39167408	28.77493718	93.1124225	7.779028035	2052.477839	1947.284846	743.0466235	1.406872239	NaN	NaN	NaN	NaN	NaN	8.5, S
'28-Sep-2022 11:00:00'	4.708333333	1	NaN	NaN	20.40809833	28.77531361	93.15657417	7.779132202	2052.57017	1947.36096	743.4885227	1.407252304	NaN	NaN	NaN	NaN	NaN	8.5, S
'28-Sep-2022 12:00:00'	4.75	1	NaN	NaN	20.42450585	28.77583872	93.034767	7.779236368	2052.6625	1947.437073	743.932845	1.40763075	NaN	NaN	NaN	NaN	NaN	8.5, S
'28-Sep-2022 13:00:00'	4.791666667	1	NaN	NaN	20.44120336	28.77621485	93.23267267	7.779340535	2052.754831	1947.513187	744.3831398	1.408014487	NaN	NaN	NaN	NaN	NaN	8.5, S
'28-Sep-2022 14:00:00'	4.833333333	1	NaN	NaN	20.45979556	28.77657778	93.18844867	7.779469702	2052.847162	1947.5893	744.8885928	1.408421932	NaN	NaN	NaN	NaN	NaN	8.5, S
'28-Sep-2022 15:00:00'	4.875	1	NaN	NaN	20.47580194	28.77711	93.18789817	7.779598868	2052.939493	1947.665414	745.3220706	1.4087958	NaN	NaN	NaN	NaN	NaN	8.5, S
'28-Sep-2022 16:00:00'	4.916666667	1	NaN	NaN	20.48429352	28.77770423	92.97647	7.779728035	2053.031824	1947.741528	745.5378976	1.40907617	NaN	NaN	NaN	NaN	NaN	8.5, S
'28-Sep-2022 17:00:00'	4.958333333	1	NaN	NaN	20.481755	28.77860083	92.98642783	7.779857202	2053.124154	1947.817641	745.4378471	1.409216922	NaN	NaN	NaN	NaN	2066.471013	8.5, S
'28-Sep-2022 18:00:00'	5	1	NaN	NaN	20.47735278	28.77944639	93.22482733	7.779986368	2053.216485	1947.893755	745.2826006	1.409335157	NaN	NaN	NaN	NaN	NaN	8.5, S
'28-Sep-2022 19:00:00'	5.041666667	1	NaN	NaN	20.47199045	28.78028539	93.00841867	7.780115535	2053.308816	1947.969868	745.0993066	1.409441588	NaN	NaN	NaN	NaN	NaN	8.5, S
'28-Sep-2022 20:00:00'	5.083333333	1	NaN	NaN	20.46425306	28.78112972	92.85312467	7.780244702	2053.401147	1948.045982	744.8469987	1.409518596	NaN	NaN	NaN	NaN	NaN	8.5, S
'28-Sep-2022 21:00:00'	5.125	1	NaN	NaN	20.45737917	28.78194611	93.09598383	7.780373868	2053.493478	1948.122095	744.6193968	1.409606589	NaN	NaN	2053.493478	1948.122095	NaN	8.5, S
'28-Sep-2022 22:00:00'	5.166666667	1	NaN	NaN	20.45445815	28.78272275	92.95589133	7.780503035	2053.550757	1948.124756	744.2662806	1.41006658	NaN	NaN	NaN	NaN	NaN	8.5, S
'28-Sep-2022 23:00:00'	5.208333333	1	NaN	NaN	20.45213278	28.78347861	93.06996733	7.780632202	2053.608036	1948.127417	743.930328	1.410534203	NaN	NaN	NaN	NaN	NaN	8.5, S
'29-Sep-2022 00:00:00'	5.25	1	NaN	NaN	20.45419694	28.78414889	92.96428533	7.780761368	2053.665315	1948.130078	743.7206558	1.411057071	NaN	NaN	NaN	NaN	NaN	8.5, S
'29-Sep-2022 01:00:00'	5.291666667	1	NaN	NaN	20.45043803	28.78493662	93.06573433	7.780890535	2053.722594	1948.132738	743.3439648	1.411506723	NaN	NaN	NaN	NaN	NaN	8.5, S
'29-Sep-2022 02:00:00'	5.333333333	1	NaN	NaN	20.44258167	28.78579444	92.96323733	7.781019702	2053.779873	1948.135399	742.8497467	1.411904991	NaN	NaN	NaN	NaN	NaN	8.5, S
'29-Sep-2022 03:00:00'	5.375	1	NaN	NaN	20.43778389	28.78662722	93.07802633	7.781148868	2053.837151	1948.13806	742.444229	1.412341403	NaN	NaN	NaN	NaN	NaN	8.5, S
'29-Sep-2022 04:00:00'	5.416666667	1	NaN	NaN	20.43979437	28.7872307	93.03734283	7.781278035	2053.89443	1948.140721	742.2324329	1.412864509	NaN	NaN	NaN	NaN	NaN	8.5, S
'29-Sep-2022 05:00:00'	5.458333333	1	NaN	NaN	20.44739889	28.78770499	93.03190167	7.781407202	2053.951709	1948.143381	742.1807698	1.413458289	NaN	NaN	NaN	NaN	NaN	8.5, S
'29-Sep-2022 06:00:00'	5.5	1	NaN	NaN	20.46206667	28.78809083	93.1045905	7.781536368	2054.008988	1948.146042	742.3325802	1.414140604	NaN	NaN	NaN	NaN	NaN	8.5, S
'29-Sep-2022 07:00:00'	5.541666667	1	NaN	NaN	20.47737163	28.78861938	93.01200383	7.781665535	2054.066267	1948.148703	742.5055385	1.414829521	NaN	NaN	NaN	NaN	NaN	8.5, S
'29-Sep-2022 08:00:00'	5.583333333	1	NaN	NaN	20.49265917	28.7891625	92.8932605	7.781794702	2054.123546	1948.151363	742.6783349	1.41551829	NaN	NaN	NaN	NaN	NaN	8.5, S
'29-Sep-2022 09:00:00'	5.625	1	NaN	NaN	20.50738861	28.78973833	93.04509683	7.781923868	2054.180825	1948.154024	742.8355952	1.416200008	NaN	NaN	NaN	NaN	NaN	8.5, S
'29-Sep-2022 10:00:00'	5.666666667	1	NaN	NaN	20.52138343	28.79036854	93.11707283	7.782053035	2054.238104	1948.156685	742.9725762	1.416872236	NaN	NaN	NaN	NaN	NaN	8.5, S
'29-Sep-2022 11:00:00'	5.708333333	1	NaN	NaN	20.53515944	28.79103472	92.898007	7.782182202	2054.295383	1948.159346	743.1039223	1.417541562	NaN	NaN	NaN	NaN	NaN	8.5, S
'29-Sep-2022 12:00:00'	5.75	1	NaN	NaN	20.54916306	28.79168611	93.0186995	7.782311368	2054.352662	1948.162006	743.241683	1.418214071	NaN	NaN	NaN	NaN	NaN	8.5, S
'29-Sep-2022 13:00:00'	5.791666667	1	NaN	NaN	20.56398455	28.79224185	92.89046333	7.782440535	2054.409941	1948.164667	743.4015512	1.418897976	NaN	NaN	NaN	NaN	NaN	8.5, S
'29-Sep-2022 14:00:00'	5.833333333	1	NaN	NaN	20.58011222	28.79278639	93.05834233	7.782523868	2054.46722	1948.167328	743.5992532	1.419598481	NaN	NaN	NaN	NaN	NaN	8.5, S
'29-Sep-2022 15:00:00'	5.875	1	NaN	NaN	20.59835278	28.79332028	92.94401767	7.782607202	2054.524499	1948.169989	743.8582713	1.420325669	NaN	NaN	NaN	NaN	2062.046388	8.5, S
'29-Sep-2022 16:00:00'	5.916666667	1	NaN	NaN	20.60937199	28.79407619	93.19290917	7.782690535	2054.581778	1948.172649	743.9114706	1.420960703	NaN	NaN	NaN	NaN	NaN	8.5, S
'29-Sep-2022 17:00:00'	5.958333333	1	NaN	NaN	20.61555223	28.79499637	93.20689267	7.782773868	2054.639057	1948.17531	743.8270339	1.421533764	NaN	NaN	NaN	NaN	NaN	8.5, S
'29-Sep-2022 18:00:00'	6	1	NaN	NaN	20.62158972	28.79587639	93.21093217	7.782857202	2054.696336	1948.177971	743.7377928	1.422105569	NaN	NaN	2054.696336	1948.177971	NaN	8.5, S
'29-Sep-2022 19:00:00'	6.041666667	1	NaN	NaN	20.62546351	28.79680919	93.1053805	7.782940535	2054.734435	1948.143448	743.4732331	1.422800533	NaN	NaN	NaN	NaN	NaN	8.5, S
'29-Sep-2022 20:00:00'	6.083333333	1	NaN	NaN	20.62935674	28.79769213	92.85179167	7.783023868	2054.772534	1948.108925	743.2085285	1.423496397	NaN	NaN	NaN	NaN	NaN	8.5, S
'29-Sep-2022 21:00:00'	6.125	1	NaN	NaN	20.63465152	28.79861053	92.90504083	7.783107202	2054.810632	1948.074401	742.98535	1.424209514	NaN	NaN	NaN	NaN	NaN	8.5, S
'29-Sep-2022 22:00:00'	6.166666667	1	NaN	NaN	20.63969972	28.79949361	92.83727933	7.783190535	2054.848731	1948.039878	742.7545418	1.424920064	NaN	NaN	NaN	NaN	NaN	8.5, S
'29-Sep-2022 23:00:00'	6.208333333	1	NaN	NaN	20.64272556	28.80042416	93.31502733	7.783273868	2054.88683	1948.005355	742.4660771	1.425604954	NaN	NaN	NaN	NaN	NaN	8.5, S
'30-Sep-2022 00:00:00'	6.25	1	NaN	NaN	20.64214389	28.80142722	92.98486583	7.783357202	2054.924929	1947.970832	742.0744953	1.426244067	NaN	NaN	NaN	NaN	NaN	8.5, S
'30-Sep-2022 01:00:00'	6.291666667	1	NaN	NaN	20.64937194	28.8021725	92.801803	7.783440535	2054.963028	1947.936309	741.90498	1.426983734	NaN	NaN	NaN	NaN	NaN	8.5, S
'30-Sep-2022 02:00:00'	6.333333333	1	NaN	NaN	20.66134563	28.80283662	92.96809483	7.783523868	2055.001127	1947.901786	741.8717218	1.427783838	NaN	NaN	NaN	NaN	NaN	8.5, S
'30-Sep-2022 03:00:00'	6.375	1	NaN	NaN	20.67351889	28.80350694	92.892427	7.783607202	2055.039226	1947.867263	741.8444569	1.428586601	NaN	NaN	NaN	NaN	NaN	8.5, S
'30-Sep-2022 04:00:00'	6.416666667	1	NaN	NaN	20.68575861	28.80422278	92.6982155	7.783690535	2055.077325	1947.83274	741.820035	1.429389935	NaN	NaN	NaN	NaN	NaN	8.5, S
'30-Sep-2022 05:00:00'	6.458333333	1	NaN	NaN	20.69796854	28.80493146	92.98305583	7.783773868	2055.115424	1947.798217	741.7947147	1.430193202	NaN	NaN	NaN	NaN	NaN	8.5, S
'30-Sep-2022 06:00:00'	6.5	1	NaN	NaN	20.70964167	28.80573333	92.74082283	7.783857202	2055.153522	1947.763694	741.7556118	1.430988952	NaN	NaN	NaN	NaN	NaN	8.5, S
'30-Sep-2022 07:00:00'	6.541666667	1	NaN	NaN	20.72182028	28.80644556	92.83376667	7.783940535	2055.191621	1947.729171	741.7296375	1.431792241	NaN	NaN	NaN	NaN	NaN	8.5, S
'30-Sep-2022 08:00:00'	6.583333333	1	NaN	NaN	20.73402028	28.80716141	92.90516683	7.784023868	2055.22972	1947.694648	741.7044432	1.432595987	NaN	NaN	NaN	NaN	NaN	8.5, S
'30-Sep-2022 09:00:00'	6.625	1	NaN	NaN	20.74593667	28.80791694	92.90590983	7.784107202	2055.267819	1947.660125	741.6718407	1.433395965	NaN	NaN	NaN	NaN	NaN	8.5, S
'30-Sep-2022 10:00:00'	6.666666667	1	NaN	NaN	20.75697	28.80863361	92.80476367	7.784190535	2055.305918	1947.625602	741.6130435	1.43418548	NaN	NaN	NaN	NaN	NaN	8.5, S
'30-Sep-2022 11:00:00'	6.708333333	1	NaN	NaN	20.76803708	28.80941713	92.79863117	7.784273868	2055.344017	1947.591078	741.5565315	1.434974903	NaN	NaN	NaN	NaN	NaN	8.5, S
'30-Sep-2022 12:00:00'	6.75	1	NaN	NaN	20.77892278	28.81021361	92.91523383	7.784357202	2055.382116	1947.556555	741.4950986	1.435762109	NaN	NaN	NaN	NaN	NaN	8.5, S
'30-Sep-2022 13:00:00'	6.791666667	1	NaN	NaN	20.79012667	28.81094833	93.12826733	7.784440535	2055.420215	1947.522032	741.4418684	1.436554206	NaN	NaN	NaN	NaN	NaN	8.5, S
'30-Sep-2022 14:00:00'	6.833333333	1	NaN	NaN	20.80309099	28.81161521	93.07760683	7.784503035	2055.458314	1947.487509	741.4385033	1.437369457	NaN	NaN	NaN	NaN	NaN	8.5, S
'30-Sep-2022 15:00:00'	6.875	1	NaN	NaN	20.81743333	28.81220694	93.06838867	7.784565535	2055.496412	1947.452986	741.4737879	1.438203161	NaN	NaN	NaN	NaN	NaN	8.5, S
'30-Sep-2022 16:00:00'	6.916666667	1	NaN	NaN	20.83266602	28.81278719	93.10489933	7.784628035	2055.534511	1947.418463	741.5347442	1.439048502	NaN	NaN	NaN	NaN	NaN	8.5, S
'30-Sep-2022 17:00:00'	6.958333333	1	NaN	NaN	20.84686275	28.8134619	93.09746267	7.784690535	2055.57261	1947.38394	741.5674887	1.439879999	NaN	NaN	NaN	NaN	NaN	8.5, S
'30-Sep-2022 18:00:00'	7	1	NaN	NaN	20.85134889	28.81439889	92.76656483	7.784753035	2055.610709	1947.349417	741.3238195	1.440586098	NaN	NaN	NaN	NaN	NaN	8.5, S
'30-Sep-2022 19:00:00'	7.041666667	1	NaN	NaN	20.85160306	28.81541917	92.69014383	7.784815535	2055.648808	1947.314894	740.9593287	1.441237891	NaN	NaN	NaN	NaN	NaN	8.5, S
'30-Sep-2022 20:00:00'	7.083333333	1	NaN	NaN	20.85044045	28.81645393	92.85996167	7.784878035	2055.686907	1947.280371	740.5543787	1.4418717	NaN	NaN	NaN	NaN	NaN	8.5, S
'30-Sep-2022 21:00:00'	7.125	1	NaN	NaN	20.85473111	28.81733028	92.69157467	7.784940535	2055.725006	1947.245848	740.3045809	1.442576323	NaN	NaN	NaN	NaN	NaN	8.5, S
'30-Sep-2022 22:00:00'	7.166666667	1	NaN	NaN	20.86503611	28.81805083	92.7894575	7.785003035	2055.763105	1947.211325	740.2260592	1.443358917	NaN	NaN	NaN	NaN	NaN	8.5, S
'30-Sep-2022 23:00:00'	7.208333333	1	NaN	NaN	20.87676461	28.81870028	92.775344	7.785065535	2055.801203	1947.176802	740.1875187	1.444160524	NaN	NaN	NaN	NaN	NaN	8.5, S
'01-Oct-2022 00:00:00'	7.25	1	NaN	NaN	20.88948861	28.81931389	92.63740617	7.785128035	2055.839302	1947.142278	740.1772107	1.444975368	NaN	NaN	NaN	NaN	NaN	8.5, S
'01-Oct-2022 01:00:00'	7.291666667	1	NaN	NaN	20.901805	28.8200225	92.76950867	7.785190535	2055.877401	1947.107755	740.1569235	1.445784231	NaN	NaN	NaN	NaN	NaN	8.5, S
'01-Oct-2022 02:00:00'	7.333333333	1	NaN	NaN	20.91440955	28.82072753	92.7678365	7.785253035	2055.9155	1947.073232	740.1449956	1.446597021	NaN	NaN	NaN	NaN	NaN	8.5, S
'01-Oct-2022 03:00:00'	7.375	1	NaN	NaN	20.92684583	28.82137167	92.59253783	7.785315535	2055.953599	1947.038709	740.127196	1.447408584	NaN	NaN	NaN	NaN	NaN	8.5, S
'01-Oct-2022 04:00:00'	7.416666667	1	NaN	NaN	20.94040444	28.82199333	92.75308433	7.785378035	2055.991698	1947.004186	740.1415272	1.448234891	NaN	NaN	NaN	NaN	NaN	8.5, S
'01-Oct-2022 05:00:00'	7.458333333	1	NaN	NaN	20.95426479	28.82256225	92.58526933	7.785440535	2056.029797	1946.969663	740.1637181	1.449065873	NaN	NaN	NaN	NaN	NaN	8.5, S
'01-Oct-2022 06:00:00'	7.5	1	NaN	NaN	20.96608694	28.82322444	92.45802117	7.785503035	2056.067896	1946.93514	740.1287648	1.449870142	NaN	NaN	NaN	NaN	NaN	8.5, S
'01-Oct-2022 07:00:00'	7.541666667	1	NaN	NaN	20.97787778	28.8238725	92.54851617	7.785565535	2056.105995	1946.900617	740.0927456	1.450674394	NaN	NaN	NaN	NaN	NaN	8.5, S
'01-Oct-2022 08:00:00'	7.583333333	1	NaN	NaN	20.98867725	28.82468371	93.00833067	7.785628035	2056.144093	1946.866094	740.0311158	1.451464423	NaN	NaN	NaN	NaN	NaN	8.5, S
'01-Oct-2022 09:00:00'	7.625	1	NaN	NaN	20.9986	28.82544333	92.47561417	7.785690535	2056.182192	1946.831571	739.9433206	1.452244056	NaN	NaN	NaN	NaN	NaN	8.5, S
'01-Oct-2022 10:00:00'	7.666666667	1	NaN	NaN	21.00781838	28.82627382	92.78000417	7.785753035	2056.220291	1946.797048	739.8365602	1.453014109	NaN	NaN	NaN	NaN	NaN	8.5, S
'01-Oct-2022 11:00:00'	7.708333333	1	NaN	NaN	21.0171437	28.82707087	92.510021	7.785815535	2056.25839	1946.762525	739.7323974	1.453786081	NaN	NaN	NaN	NaN	NaN	8.5, S
'01-Oct-2022 12:00:00'	7.75	1	NaN	NaN	21.02545222	28.82783056	92.65715767	7.785878035	2056.296489	1946.728002	739.598304	1.454545673	NaN	NaN	NaN	NaN	NaN	8.5, S
'01-Oct-2022 13:00:00'	7.791666667	1	NaN	NaN	21.0342234	28.82864234	92.5472445	7.785940535	2056.334588	1946.693479	739.478632	1.455310762	NaN	NaN	NaN	NaN	NaN	8.5, S
'01-Oct-2022 14:00:00'	7.833333333	1	NaN	NaN	21.04209916	28.82945182	92.61991217	7.785973868	2056.372687	1946.658955	739.3331827	1.456064611	NaN	NaN	NaN	NaN	NaN	8.5, S
'01-Oct-2022 15:00:00'	7.875	1	NaN	NaN	21.05061083	28.83017833	92.62016233	7.786007202	2056.410786	1946.624432	739.2047178	1.456827684	NaN	NaN	NaN	NaN	NaN	8.5, S
'01-Oct-2022 16:00:00'	7.916666667	1	NaN	NaN	21.05975333	28.83095806	92.425793	7.786040535	2056.448885	1946.589909	739.0955381	1.457598405	NaN	NaN	NaN	NaN	NaN	8.5, S
'01-Oct-2022 17:00:00'	7.958333333	1	NaN	NaN	21.07119635	28.83161348	92.502509	7.786073868	2056.486983	1946.555386	739.0506151	1.458400147	NaN	NaN	NaN	NaN	NaN	8.5, S
'01-Oct-2022 18:00:00'	8	1	NaN	NaN	21.08367056	28.83219528	92.29575	7.786107202	2056.525082	1946.520863	739.0342155	1.459216142	NaN	NaN	NaN	NaN	NaN	8.5, S
'01-Oct-2022 19:00:00'	8.041666667	1	NaN	NaN	21.09685111	28.83281389	92.5082965	7.786140535	2056.563181	1946.48634	739.0389538	1.460041011	NaN	NaN	NaN	NaN	NaN	8.5, S
'01-Oct-2022 20:00:00'	8.083333333	1	NaN	NaN	21.1110073	28.83336461	92.475035	7.786173868	2056.60128	1946.451817	739.0707083	1.460879403	NaN	NaN	NaN	NaN	NaN	8.5, S
'01-Oct-2022 21:00:00'	8.125	1	NaN	NaN	21.12472917	28.83396917	92.4345505	7.786207202	2056.639379	1946.417294	739.0909903	1.461711879	NaN	NaN	NaN	NaN	NaN	8.5, S
'01-Oct-2022 22:00:00'	8.166666667	1	NaN	NaN	21.13840472	28.83447917	92.36129717	7.786240535	2056.677478	1946.382771	739.1083175	1.462545083	NaN	NaN	NaN	NaN	NaN	8.5, S
'01-Oct-2022 23:00:00'	8.208333333	1	NaN	NaN	21.1508691	28.83505758	92.7132005	7.786273868	2056.715577	1946.348248	739.0920215	1.463362206	NaN	NaN	NaN	NaN	NaN	8.5, S
'02-Oct-2022 00:00:00'	8.25	1	NaN	NaN	21.16151671	28.83565042	92.56152867	7.786307202	2056.753676	1946.313725	739.0236622	1.464156041	NaN	NaN	NaN	NaN	NaN	8.5, S
'02-Oct-2022 01:00:00'	8.291666667	1	NaN	NaN	21.17111773	28.83633684	92.36675217	7.786340535	2056.791775	1946.279202	738.9269028	1.464935557	NaN	NaN	NaN	NaN	NaN	8.5, S
'02-Oct-2022 02:00:00'	8.333333333	1	NaN	NaN	21.17984494	28.83704635	92.63646733	7.786373868	2056.829873	1946.244679	738.8054669	1.465703753	NaN	NaN	NaN	NaN	NaN	8.5, S
'02-Oct-2022 03:00:00'	8.375	1	NaN	NaN	21.18213917	28.83796528	92.46785067	7.786407202	2056.867972	1946.210155	738.5024479	1.466386912	NaN	NaN	NaN	NaN	NaN	8.5, S
'02-Oct-2022 04:00:00'	8.416666667	1	NaN	NaN	21.18653556	28.8387875	92.18552	7.786440535	2056.906071	1946.175632	738.2584844	1.467098351	NaN	NaN	NaN	NaN	NaN	8.5, S
'02-Oct-2022 05:00:00'	8.458333333	1	NaN	NaN	21.19318034	28.83967219	92.33856983	7.786473868	2056.94417	1946.141109	738.0806058	1.467838176	NaN	NaN	NaN	NaN	NaN	8.5, S
'02-Oct-2022 06:00:00'	8.5	1	NaN	NaN	21.19902841	28.84047994	92.31361283	7.786507202	2056.982269	1946.106586	737.8785287	1.468568754	NaN	NaN	NaN	NaN	NaN	8.5, S
'02-Oct-2022 07:00:00'	8.541666667	1	NaN	NaN	21.2042133	28.84135596	92.60538367	7.786540535	2057.020368	1946.072063	737.6587355	1.469290142	NaN	NaN	NaN	NaN	NaN	8.5, S
'02-Oct-2022 08:00:00'	8.583333333	1	NaN	NaN	21.20738113	28.84227944	92.41927417	7.786573868	2057.058467	1946.03754	737.3818912	1.469985099	NaN	NaN	NaN	NaN	NaN	8.5, S
'02-Oct-2022 09:00:00'	8.625	1	NaN	NaN	21.20950611	28.8432925	92.47427567	7.786607202	2057.096566	1946.003017	737.0768489	1.470665688	NaN	NaN	NaN	NaN	NaN	8.5, S
'02-Oct-2022 10:00:00'	8.666666667	1	NaN	NaN	21.21162271	28.84435125	92.20798867	7.786640535	2057.134665	1945.968494	736.7726073	1.47134575	NaN	NaN	NaN	NaN	NaN	8.5, S
'02-Oct-2022 11:00:00'	8.708333333	1	NaN	NaN	21.21656563	28.84521746	92.408059	7.786673868	2057.172763	1945.933971	736.5463896	1.472064608	NaN	NaN	NaN	NaN	NaN	8.5, S
'02-Oct-2022 12:00:00'	8.75	1	NaN	NaN	21.22305738	28.84609025	92.45312233	7.786707202	2057.210862	1945.899448	736.3649837	1.472803527	NaN	NaN	NaN	NaN	NaN	8.5, S
'02-Oct-2022 13:00:00'	8.791666667	1	NaN	NaN	21.23109695	28.84686177	92.324037	7.786740535	2057.248961	1945.864925	736.2263861	1.473563757	NaN	NaN	NaN	NaN	NaN	8.5, S
'02-Oct-2022 14:00:00'	8.833333333	1	NaN	NaN	21.23854888	28.84760393	92.41550917	7.786782202	2057.28706	1945.830402	736.070493	1.47431689	NaN	NaN	NaN	NaN	NaN	8.5, S
'02-Oct-2022 15:00:00'	8.875	1	NaN	NaN	21.24584028	28.84837333	92.48556183	7.786823868	2057.325159	1945.795879	735.910607	1.475067793	NaN	NaN	NaN	NaN	NaN	8.5, S
'02-Oct-2022 16:00:00'	8.916666667	1	NaN	NaN	21.25189081	28.84922591	92.27473067	7.786865535	2057.363258	1945.761356	735.7167041	1.475801839	NaN	NaN	NaN	NaN	NaN	8.5, S
'02-Oct-2022 17:00:00'	8.958333333	1	NaN	NaN	21.25691404	28.85008455	92.36413917	7.786907202	2057.401357	1945.726832	735.4935563	1.476522654	NaN	NaN	NaN	NaN	NaN	8.5, S
'02-Oct-2022 18:00:00'	9	1	NaN	NaN	21.26082611	28.85101861	92.169236	7.786948868	2057.439456	1945.692309	735.240029	1.47722834	NaN	NaN	NaN	NaN	NaN	8.5, S
'02-Oct-2022 19:00:00'	9.041666667	1	NaN	NaN	21.26473361	28.85188667	92.35777383	7.786990535	2057.477554	1945.657786	734.9853648	1.477934844	NaN	NaN	NaN	NaN	NaN	8.5, S
'02-Oct-2022 20:00:00'	9.083333333	1	NaN	NaN	21.26622978	28.85287809	92.31341117	7.787032202	2057.515653	1945.623263	734.6639257	1.478608794	NaN	NaN	NaN	NaN	NaN	8.5, S
'02-Oct-2022 21:00:00'	9.125	1	NaN	NaN	21.266065	28.85391778	92.065577	7.787073868	2057.553752	1945.58874	734.2959585	1.479260754	NaN	NaN	NaN	NaN	NaN	8.5, S
'02-Oct-2022 22:00:00'	9.166666667	1	NaN	NaN	21.26398389	28.85505306	92.2814995	7.787115535	2057.591851	1945.554217	733.8750579	1.479886852	NaN	NaN	NaN	NaN	NaN	8.5, S
'02-Oct-2022 23:00:00'	9.208333333	1	NaN	NaN	21.2608369	28.8561569	91.99420317	7.787157202	2057.62995	1945.519694	733.4233838	1.480499568	NaN	NaN	NaN	NaN	NaN	8.5, S
'03-Oct-2022 00:00:00'	9.25	1	NaN	NaN	21.25755152	28.85732853	92.27965067	7.787198868	2057.668049	1945.485171	732.9693196	1.481109777	NaN	NaN	NaN	NaN	NaN	8.5, S
'03-Oct-2022 01:00:00'	9.291666667	1	NaN	NaN	21.25332861	28.85853028	91.89517617	7.787240535	2057.706148	1945.450648	732.489329	1.48170755	NaN	NaN	NaN	NaN	NaN	8.5, S
'03-Oct-2022 02:00:00'	9.333333333	1	NaN	NaN	21.2481709	28.85974492	92.21660733	7.787282202	2057.744247	1945.416125	731.9832269	1.482293117	NaN	NaN	NaN	NaN	NaN	8.5, S
'03-Oct-2022 03:00:00'	9.375	1	NaN	NaN	21.24261828	28.86095291	92.14554733	7.787323868	2057.782346	1945.381602	731.4661388	1.482873705	NaN	NaN	NaN	NaN	NaN	8.5, S
'03-Oct-2022 04:00:00'	9.416666667	1	NaN	NaN	21.23663778	28.86219833	91.96116933	7.787365535	2057.820444	1945.347079	730.9379336	1.483448375	NaN	NaN	NaN	NaN	NaN	8.5, S
'03-Oct-2022 05:00:00'	9.458333333	1	NaN	NaN	21.23112676	28.86342394	92.00994633	7.787407202	2057.858543	1945.312556	730.4232187	1.484029428	NaN	NaN	NaN	NaN	NaN	8.5, S
'03-Oct-2022 06:00:00'	9.5	1	NaN	NaN	21.22579141	28.8646036	92.06629217	7.787448868	2057.896642	1945.278032	729.913121	1.484613358	NaN	NaN	NaN	NaN	NaN	8.5, S
'03-Oct-2022 07:00:00'	9.541666667	1	NaN	NaN	21.220595	28.86579611	92.03800133	7.787490535	2057.934741	1945.243509	729.407637	1.485199007	NaN	NaN	NaN	NaN	NaN	8.5, S
'03-Oct-2022 08:00:00'	9.583333333	1	NaN	NaN	21.21546124	28.86697697	92.12503067	7.787532202	2057.97284	1945.208986	728.9041473	1.485785669	NaN	NaN	NaN	NaN	NaN	8.5, S
'03-Oct-2022 09:00:00'	9.625	1	NaN	NaN	21.21010501	28.86816908	91.96965517	7.787573868	2058.010939	1945.174463	728.394941	1.486369379	NaN	NaN	NaN	NaN	NaN	8.5, S
'03-Oct-2022 10:00:00'	9.666666667	1	NaN	NaN	21.20431163	28.86935263	91.7284415	7.787615535	2058.049038	1945.13994	727.8735664	1.486947584	NaN	NaN	NaN	NaN	NaN	8.5, S
'03-Oct-2022 11:00:00'	9.708333333	1	21.05277778	NaN	21.19913034	28.87050197	91.6239745	7.787657202	2058.087137	1945.105417	727.3694234	1.487534192	NaN	NaN	NaN	NaN	NaN	8.5, S
'03-Oct-2022 12:00:00'	9.75	1	21.04444444	NaN	21.19432284	28.87164708	91.73337683	7.787698868	2058.125236	1945.070894	726.8762443	1.488125765	NaN	NaN	NaN	NaN	NaN	8.5, S
'03-Oct-2022 13:00:00'	9.791666667	1	21.02647059	NaN	21.19163324	28.87280416	92.45917483	7.787740535	2058.163334	1945.036371	726.4438338	1.488744744	NaN	NaN	NaN	NaN	NaN	8.5, S
'03-Oct-2022 14:00:00'	9.833333333	1	20.91851852	NaN	21.18935562	28.8739368	92.99571167	7.788140535	2058.201433	1945.001848	726.0230179	1.489369426	NaN	NaN	2058.201433	1945.001848	2063.972273	8.5, S
'03-Oct-2022 15:00:00'	9.875	1	20.9	NaN	21.18707939	28.87505766	92.24123533	7.788540535	2058.223385	1944.986714	725.787692	1.489668746	NaN	NaN	NaN	NaN	NaN	8.5, S
'03-Oct-2022 16:00:00'	9.916666667	1	20.84166667	NaN	21.18488753	28.87613269	92.45017633	7.788940535	2058.245336	1944.97158	725.5540398	1.48996971	NaN	NaN	NaN	NaN	NaN	8.5, S
'03-Oct-2022 17:00:00'	9.958333333	1	20.8	NaN	21.18211577	28.87724676	91.82601867	7.789340535	2058.267287	1944.956446	725.3047301	1.490262704	NaN	NaN	NaN	NaN	NaN	8.5, S
'03-Oct-2022 18:00:00'	10	1	20.8	NaN	21.17734457	28.87839554	91.71759967	7.789740535	2058.289238	1944.941313	724.9994516	1.490529357	NaN	NaN	NaN	NaN	NaN	8.5, S
'03-Oct-2022 19:00:00'	10.04166667	1	20.62	NaN	21.17215762	28.87953684	92.19436117	7.790140535	2058.31119	1944.926179	724.6823989	1.490790715	NaN	NaN	NaN	NaN	NaN	8.5, S
'03-Oct-2022 20:00:00'	10.08333333	1	20.275	NaN	21.16740562	28.88061124	91.84893817	7.790540535	2058.333141	1944.911045	724.3766297	1.491058515	NaN	NaN	NaN	NaN	NaN	8.5, S
'03-Oct-2022 21:00:00'	10.125	1	20	NaN	21.16232869	28.88172758	91.82485	7.790940535	2058.355092	1944.895911	724.0625466	1.491321621	NaN	NaN	NaN	NaN	NaN	8.5, S
'03-Oct-2022 22:00:00'	10.16666667	1	19.74166667	NaN	21.15704127	28.8828	91.57272517	7.791340535	2058.377044	1944.880777	723.7418727	1.491582525	NaN	NaN	NaN	NaN	NaN	8.5, S
'03-Oct-2022 23:00:00'	10.20833333	1	19.54166667	NaN	21.15041517	28.88390899	91.92981733	7.791740535	2058.398995	1944.865643	723.3841197	1.491825649	NaN	NaN	NaN	NaN	NaN	8.5, S
'04-Oct-2022 00:00:00'	10.25	1	19.36666667	NaN	21.14055944	28.88506917	91.31178367	7.792140535	2058.420946	1944.850509	722.9361128	1.492026302	NaN	NaN	NaN	NaN	NaN	8.5, S
'04-Oct-2022 01:00:00'	10.29166667	1	19.21666667	NaN	21.12751142	28.8863493	91.86099567	7.792540535	2058.442897	1944.835376	722.4002715	1.492184188	NaN	NaN	NaN	NaN	NaN	8.5, S
'04-Oct-2022 02:00:00'	10.33333333	1	19.05	NaN	21.111907	28.8876507	91.803207	7.792940535	2058.464849	1944.820242	721.7929731	1.492308747	NaN	NaN	NaN	NaN	NaN	8.5, S
'04-Oct-2022 03:00:00'	10.375	1	18.95	NaN	21.09495583	28.88892333	91.14738617	7.793340535	2058.4868	1944.805108	721.1476239	1.492416275	NaN	NaN	NaN	NaN	NaN	8.5, S
'04-Oct-2022 04:00:00'	10.41666667	1	18.80833333	NaN	21.07648802	28.89024234	91.03750017	7.793740535	2058.508751	1944.789974	720.460851	1.492503716	NaN	NaN	NaN	NaN	NaN	8.5, S
'04-Oct-2022 05:00:00'	10.45833333	1	18.725	NaN	21.0564605	28.89154874	91.46023417	7.794140535	2058.530703	1944.77484	719.7304985	1.492571234	NaN	NaN	NaN	NaN	NaN	8.5, S
'04-Oct-2022 06:00:00'	10.5	1	18.7	NaN	21.03553944	28.89280833	91.3402905	7.794540535	2058.552654	1944.759706	718.9748284	1.492627877	NaN	NaN	NaN	NaN	NaN	8.5, S
'04-Oct-2022 07:00:00'	10.54166667	1	18.7	NaN	21.01396964	28.89408329	90.84521517	7.794940535	2058.574605	1944.744572	718.2018922	1.492676103	NaN	NaN	NaN	NaN	NaN	8.5, S
'04-Oct-2022 08:00:00'	10.58333333	1	18.7	NaN	20.99154017	28.89536039	90.87124567	7.795340535	2058.596556	1944.729439	717.4055787	1.492713357	NaN	NaN	NaN	NaN	NaN	8.5, S
'04-Oct-2022 09:00:00'	10.625	1	18.82647059	NaN	20.96935972	28.89659722	90.897767	7.795740535	2058.618508	1944.714305	716.616331	1.492754468	NaN	NaN	NaN	NaN	NaN	8.5, S
'04-Oct-2022 10:00:00'	10.66666667	1	18.83703704	NaN	20.94702033	28.897839	90.96648733	7.796140535	2058.640459	1944.699171	715.8234851	1.492793637	NaN	NaN	NaN	NaN	NaN	8.5, S
'04-Oct-2022 11:00:00'	10.70833333	1	18.89655172	NaN	20.9251323	28.89907472	90.78431483	7.796540535	2058.66241	1944.684037	715.0439602	1.492838866	NaN	NaN	NaN	NaN	NaN	8.5, S
'04-Oct-2022 12:00:00'	10.75	1	18.86666667	NaN	20.9038072	28.90026233	91.12957533	7.796940535	2058.684362	1944.668903	714.2801052	1.492892074	NaN	NaN	NaN	NaN	NaN	8.5, S
'04-Oct-2022 13:00:00'	10.79166667	1	18.925	NaN	20.88374	28.90143417	91.14337583	7.797340535	2058.706313	1944.653769	713.5518865	1.492961819	NaN	NaN	NaN	NaN	NaN	8.5, S
'04-Oct-2022 14:00:00'	10.83333333	1	19	NaN	20.86669014	28.90255239	90.78091133	7.797486368	2058.728264	1944.638636	712.9077244	1.493071161	NaN	NaN	NaN	NaN	NaN	8.5, S
'04-Oct-2022 15:00:00'	10.875	1	19.075	NaN	20.85104349	28.90363186	90.35494817	7.797632202	2058.750215	1944.623502	712.302603	1.493199107	NaN	NaN	NaN	NaN	NaN	8.5, S
'04-Oct-2022 16:00:00'	10.91666667	1	19.16666667	NaN	20.83630528	28.9046925	90.446802	7.797778035	2058.772167	1944.608368	711.7229785	1.493339036	NaN	NaN	NaN	NaN	NaN	8.5, S
'04-Oct-2022 17:00:00'	10.95833333	1	19.225	NaN	20.82390056	28.90566977	90.64624367	7.797923868	2058.794118	1944.593234	711.2074172	1.493510014	NaN	NaN	NaN	NaN	NaN	8.5, S
'04-Oct-2022 18:00:00'	11	1	19.3	NaN	20.81303767	28.90666427	90.62979133	7.798069702	2058.816069	1944.5781	710.7354909	1.493700658	NaN	NaN	NaN	NaN	NaN	8.5, S
'04-Oct-2022 19:00:00'	11.04166667	1	19.38333333	NaN	20.80399556	28.90756	90.33759683	7.798215535	2058.838021	1944.562966	710.3128691	1.493915898	NaN	NaN	NaN	NaN	NaN	8.5, S
'04-Oct-2022 20:00:00'	11.08333333	1	19.43333333	NaN	20.79662535	28.90846732	90.352152	7.798361368	2058.859972	1944.547832	709.9372601	1.494152514	NaN	NaN	NaN	NaN	NaN	8.5, S
'04-Oct-2022 21:00:00'	11.125	1	19.5	NaN	20.79058361	28.90933028	90.33621517	7.798507202	2058.881923	1944.532699	709.5980602	1.494406741	NaN	NaN	NaN	NaN	NaN	8.5, S
'04-Oct-2022 22:00:00'	11.16666667	1	19.5	NaN	20.7857446	28.91020803	90.30699567	7.798653035	2058.903874	1944.517565	709.292759	1.494676264	NaN	NaN	NaN	NaN	NaN	8.5, S
'04-Oct-2022 23:00:00'	11.20833333	1	19.5	NaN	20.78199298	28.91105646	90.38769633	7.798798868	2058.925826	1944.502431	709.0173389	1.494960118	NaN	NaN	NaN	NaN	NaN	8.5, S
'05-Oct-2022 00:00:00'	11.25	1	19.5	NaN	20.77940585	28.91186992	91.2533965	7.798944702	2058.947777	1944.487297	708.7738153	1.495259358	NaN	NaN	NaN	NaN	NaN	8.5, S
'05-Oct-2022 01:00:00'	11.29166667	1	19.59166667	NaN	20.77763823	28.91265125	90.2397775	7.799090535	2058.969728	1944.472163	708.5526169	1.49556952	NaN	NaN	NaN	NaN	NaN	8.5, S
'05-Oct-2022 02:00:00'	11.33333333	1	19.6	NaN	20.77645803	28.91339465	90.684387	7.799236368	2058.991679	1944.457029	708.347173	1.495887691	NaN	NaN	NaN	NaN	NaN	8.5, S
'05-Oct-2022 03:00:00'	11.375	1	19.6	NaN	20.77532535	28.91415543	90.27102017	7.799382202	2059.013631	1944.441896	708.1434333	1.496206286	NaN	NaN	NaN	NaN	NaN	8.5, S
'05-Oct-2022 04:00:00'	11.41666667	1	19.6	NaN	20.77440499	28.91495069	90.15894483	7.799528035	2059.035582	1944.426762	707.9462731	1.496527222	NaN	NaN	NaN	NaN	NaN	8.5, S
'05-Oct-2022 05:00:00'	11.45833333	1	19.65	NaN	20.77421938	28.91571573	90.16265183	7.799673868	2059.057533	1944.411628	707.7690698	1.496857973	NaN	NaN	NaN	NaN	NaN	8.5, S
'05-Oct-2022 06:00:00'	11.5	1	19.7	NaN	20.77413733	28.91648496	90.61962233	7.799819702	2059.079485	1944.396494	707.5948816	1.497190026	NaN	NaN	NaN	NaN	NaN	8.5, S
'05-Oct-2022 07:00:00'	11.54166667	1	19.68333333	NaN	20.77368006	28.91724958	90.30738867	7.799965535	2059.101436	1944.38136	707.4102615	1.497517328	NaN	NaN	NaN	NaN	NaN	8.5, S
'05-Oct-2022 08:00:00'	11.58333333	1	19.6	NaN	20.77405815	28.91799775	90.53616317	7.800111368	2059.123387	1944.366226	707.2486111	1.497855583	NaN	NaN	NaN	NaN	NaN	8.5, S
'05-Oct-2022 09:00:00'	11.625	1	19.60833333	NaN	20.77507019	28.91872591	89.9048195	7.800257202	2059.145338	1944.351092	707.1042647	1.498202246	NaN	NaN	NaN	NaN	NaN	8.5, S
'05-Oct-2022 10:00:00'	11.66666667	1	19.7	NaN	20.77530444	28.91950111	90.2714895	7.800403035	2059.16729	1944.335959	706.9392107	1.498538375	NaN	NaN	NaN	NaN	NaN	8.5, S
'05-Oct-2022 11:00:00'	11.70833333	1	19.7	NaN	20.7751507	28.92028207	89.82918333	7.800548868	2059.189241	1944.320825	706.7635555	1.498869466	NaN	NaN	NaN	NaN	NaN	8.5, S
'05-Oct-2022 12:00:00'	11.75	1	19.7	NaN	20.77481643	28.92106212	89.87537933	7.800694702	2059.211192	1944.305691	706.5829439	1.499198265	NaN	NaN	NaN	NaN	NaN	8.5, S
'05-Oct-2022 13:00:00'	11.79166667	1	19.8	NaN	20.77500583	28.9218575	89.914143	7.800840535	2059.233144	1944.290557	706.4171873	1.499533637	NaN	NaN	NaN	NaN	NaN	8.5, S
'05-Oct-2022 14:00:00'	11.83333333	1	19.9	NaN	20.77623876	28.92262921	89.75867617	7.800894702	2059.255095	1944.275423	706.2800083	1.499882735	NaN	NaN	NaN	NaN	NaN	8.5, S
'05-Oct-2022 15:00:00'	11.875	1	19.9	NaN	20.77719417	28.92344528	89.4825015	7.800948868	2059.277046	1944.260289	706.1359599	1.500227762	NaN	NaN	NaN	NaN	NaN	8.5, S
'05-Oct-2022 16:00:00'	11.91666667	1	NaN	NaN	20.77921309	28.92421337	90.10627467	7.801003035	2059.298997	1944.245155	706.0206014	1.500587064	NaN	NaN	NaN	NaN	NaN	8.5, S
'05-Oct-2022 17:00:00'	11.95833333	1	NaN	NaN	20.78219776	28.92493417	90.006524	7.801057202	2059.320949	1944.230022	705.931222	1.500959385	NaN	NaN	NaN	NaN	NaN	8.5, S
'05-Oct-2022 18:00:00'	12	1	NaN	NaN	20.78605444	28.92567889	89.76962433	7.801111368	2059.3429	1944.214888	705.8664548	1.501342682	NaN	NaN	NaN	NaN	NaN	8.5, S
'05-Oct-2022 19:00:00'	12.04166667	1	NaN	NaN	20.79099109	28.9263337	89.76415033	7.801165535	2059.364851	1944.199754	705.830072	1.501740989	NaN	NaN	NaN	NaN	NaN	8.5, S
'05-Oct-2022 20:00:00'	12.08333333	1	NaN	NaN	20.79533596	28.92705253	89.83008267	7.801219702	2059.386803	1944.18462	705.7784356	1.50213096	NaN	NaN	NaN	NaN	NaN	8.5, S
'05-Oct-2022 21:00:00'	12.125	1	NaN	NaN	20.79953972	28.92770417	89.58273367	7.801273868	2059.408754	1944.169486	705.721749	1.502519948	NaN	NaN	NaN	NaN	NaN	8.5, S
'05-Oct-2022 22:00:00'	12.16666667	1	NaN	NaN	20.80474819	28.92836741	89.63464583	7.801328035	2059.430705	1944.154352	705.6931215	1.502921788	NaN	NaN	NaN	NaN	NaN	8.5, S
'05-Oct-2022 23:00:00'	12.20833333	1	NaN	NaN	20.81067339	28.92901345	89.482344	7.801382202	2059.452656	1944.139219	705.6840708	1.50333312	NaN	NaN	NaN	NaN	NaN	8.5, S
'06-Oct-2022 00:00:00'	12.25	1	NaN	NaN	20.80768667	28.92982611	89.55977683	7.801436368	2059.474608	1944.124085	705.4311461	1.503627604	NaN	NaN	NaN	NaN	NaN	8.5, S
'06-Oct-2022 01:00:00'	12.29166667	1	NaN	NaN	20.80282758	28.93067493	89.75361967	7.801490535	2059.496559	1944.108951	705.1271323	1.503897533	NaN	NaN	NaN	NaN	NaN	8.5, S
'06-Oct-2022 02:00:00'	12.33333333	1	NaN	NaN	20.79045714	28.93162661	89.39037083	7.801544702	2059.51851	1944.093817	704.6172504	1.504069431	NaN	NaN	NaN	NaN	NaN	8.5, S
'06-Oct-2022 03:00:00'	12.375	1	NaN	NaN	20.77589028	28.93260083	89.46336317	7.801598868	2059.540462	1944.078683	704.0473917	1.50421281	NaN	NaN	NaN	NaN	NaN	8.5, S
'06-Oct-2022 04:00:00'	12.41666667	1	NaN	NaN	20.75862869	28.93364095	89.375847	7.801653035	2059.562413	1944.063549	703.40467	1.504320771	NaN	NaN	NaN	NaN	NaN	8.5, S
'06-Oct-2022 05:00:00'	12.45833333	1	NaN	NaN	20.74698143	28.93428	89.44822067	7.801707202	2059.584364	1944.048415	702.9104899	1.504505867	NaN	NaN	NaN	NaN	NaN	8.5, S
'06-Oct-2022 06:00:00'	12.5	1	NaN	NaN	20.73740032	28.93522959	89.31113883	7.801761368	2059.606315	1944.033282	702.4790276	1.504713914	NaN	NaN	NaN	NaN	NaN	8.5, S
'06-Oct-2022 07:00:00'	12.54166667	1	19.09166667	NaN	20.72781921	28.93617919	89.4008155	7.801815535	2059.628267	1944.018148	702.0478245	1.504921992	NaN	NaN	NaN	NaN	NaN	8.5, S
'06-Oct-2022 08:00:00'	12.58333333	1	19.29166667	NaN	20.7182381	28.93712878	89.40066183	7.801869702	2059.650218	1944.003014	701.6168803	1.5051301	NaN	NaN	NaN	NaN	NaN	8.5, S
'06-Oct-2022 09:00:00'	12.625	1	19.36666667	NaN	20.70865699	28.93807837	89.04868167	7.801923868	2059.672169	1943.98788	701.1861949	1.505338239	NaN	NaN	NaN	NaN	NaN	8.5, S
'06-Oct-2022 10:00:00'	12.66666667	1	19.4	NaN	20.69907588	28.93902797	89.3408905	7.801978035	2059.694121	1943.972746	700.7557682	1.505546409	NaN	NaN	NaN	NaN	NaN	8.5, S
'06-Oct-2022 11:00:00'	12.70833333	1	18.48	NaN	20.68949478	28.93997756	89.32780333	7.802032202	2059.716072	1943.957612	700.3256001	1.505754609	NaN	NaN	NaN	NaN	NaN	8.5, S
'06-Oct-2022 12:00:00'	12.75	1	18.65714286	NaN	20.67991367	28.94092715	89.01758583	7.802086368	2059.738023	1943.942479	699.8956903	1.50596284	NaN	NaN	NaN	NaN	NaN	8.5, S
'06-Oct-2022 13:00:00'	12.79166667	1	18.6	NaN	20.67033256	28.94187674	89.2022655	7.802140535	2059.759974	1943.927345	699.4660387	1.506171102	NaN	NaN	NaN	NaN	NaN	8.5, S
'06-Oct-2022 14:00:00'	12.83333333	1	NaN	NaN	20.66431892	28.94254324	89.26360717	7.802194702	2059.781926	1943.912211	699.1297713	1.506428608	NaN	NaN	NaN	NaN	NaN	8.5, S
'06-Oct-2022 15:00:00'	12.875	1	18.5	NaN	20.6501805	28.9435844	89.19481733	7.802248868	2059.803877	1943.897077	698.5770239	1.506577281	NaN	NaN	2059.803877	1943.897077	NaN	8.5, S
'06-Oct-2022 16:00:00'	12.91666667	1	18.55	NaN	20.63901884	28.94456981	89.14886517	7.802303035	2059.868422	1943.951917	698.271169	1.506537139	NaN	NaN	NaN	NaN	NaN	8.5, S
'06-Oct-2022 17:00:00'	12.95833333	1	18.6	NaN	20.62733146	28.94563567	89.38391683	7.802357202	2059.932966	1944.006758	697.9523889	1.506489333	NaN	NaN	NaN	NaN	NaN	8.5, S
'06-Oct-2022 18:00:00'	13	1	NaN	NaN	20.61536685	28.94668663	88.9700995	7.802411368	2059.997511	1944.061598	697.6258687	1.506438194	NaN	NaN	NaN	NaN	NaN	8.5, S
'06-Oct-2022 19:00:00'	13.04166667	1	NaN	NaN	20.60367944	28.94774417	88.94857417	7.802465535	2060.062056	1944.116439	697.3071886	1.506390583	NaN	NaN	NaN	NaN	NaN	8.5, S
'06-Oct-2022 20:00:00'	13.08333333	1	NaN	NaN	20.58997255	28.94883109	89.087912	7.802519702	2060.126601	1944.171279	696.9337902	1.506316773	NaN	NaN	NaN	NaN	NaN	8.5, S
'06-Oct-2022 21:00:00'	13.125	1	NaN	NaN	20.57899944	28.94986167	89.04933333	7.802573868	2060.191145	1944.226119	696.6344761	1.506278745	NaN	NaN	NaN	NaN	NaN	8.5, S
'06-Oct-2022 22:00:00'	13.16666667	1	NaN	NaN	20.57103733	28.95080808	88.9094445	7.802628035	2060.25569	1944.28096	696.4162812	1.506280346	NaN	NaN	NaN	NaN	NaN	8.5, S
'06-Oct-2022 23:00:00'	13.20833333	1	NaN	NaN	20.57565702	28.95150983	89.0408755	7.802682202	2060.320235	1944.3358	696.5385047	1.506446129	NaN	NaN	NaN	NaN	NaN	8.5, S
'07-Oct-2022 00:00:00'	13.25	1	NaN	NaN	20.58531801	28.952141	89.0376475	7.802736368	2060.384779	1944.390641	696.7976559	1.506677408	NaN	NaN	NaN	NaN	NaN	8.5, S
'07-Oct-2022 01:00:00'	13.29166667	1	NaN	NaN	20.59598083	28.95276806	88.92892133	7.802790535	2060.449324	1944.445481	697.0842797	1.506921638	NaN	NaN	NaN	NaN	NaN	8.5, S
'07-Oct-2022 02:00:00'	13.33333333	1	NaN	NaN	20.60641746	28.95351239	89.13156467	7.802844702	2060.513869	1944.500321	697.3668237	1.507161629	NaN	NaN	NaN	NaN	NaN	8.5, S
'07-Oct-2022 03:00:00'	13.375	1	NaN	NaN	20.61698781	28.95416787	88.976282	7.802898868	2060.578414	1944.555162	697.6516014	1.507404452	NaN	NaN	NaN	NaN	NaN	8.5, S
'07-Oct-2022 04:00:00'	13.41666667	1	NaN	NaN	20.62806306	28.95484111	88.82476933	7.802953035	2060.642958	1944.610002	697.9506388	1.507653608	NaN	NaN	NaN	NaN	NaN	8.5, S
'07-Oct-2022 05:00:00'	13.45833333	1	NaN	NaN	20.62451099	28.95581634	89.046723	7.803007202	2060.707503	1944.664842	697.8535954	1.50771133	NaN	NaN	NaN	NaN	NaN	8.5, S
'07-Oct-2022 06:00:00'	13.5	1	20	NaN	20.61616389	28.95683917	89.03239517	7.803061368	2060.772048	1944.719683	697.6258571	1.507706917	NaN	NaN	NaN	NaN	NaN	8.5, S
'07-Oct-2022 07:00:00'	13.54166667	1	NaN	NaN	20.61620111	28.95757341	88.97491733	7.803115535	2060.836592	1944.774523	697.6231404	1.507813603	NaN	NaN	NaN	NaN	NaN	8.5, S
'07-Oct-2022 08:00:00'	13.58333333	1	NaN	NaN	20.62374382	28.95822191	88.76657267	7.803169702	2060.901137	1944.829364	697.8248327	1.508017699	NaN	NaN	NaN	NaN	NaN	8.5, S
'07-Oct-2022 09:00:00'	13.625	1	NaN	NaN	20.63227075	28.95889248	88.9184105	7.803223868	2060.965682	1944.884204	698.0539655	1.508234209	NaN	NaN	NaN	NaN	NaN	8.5, S
'07-Oct-2022 10:00:00'	13.66666667	1	18.6	NaN	20.64086278	28.95956583	89.03104683	7.803278035	2061.030227	1944.939044	698.2849987	1.508451563	NaN	NaN	NaN	NaN	NaN	8.5, S
'07-Oct-2022 11:00:00'	13.70833333	1	18.77777778	NaN	20.64917031	28.96019692	88.8552795	7.803332202	2061.094771	1944.993885	698.5075572	1.508665804	NaN	NaN	NaN	NaN	NaN	8.5, S
'07-Oct-2022 12:00:00'	13.75	1	18.73333333	NaN	20.65682472	28.96083861	88.879592	7.803386368	2061.159316	1945.048725	698.7124235	1.508871559	NaN	NaN	NaN	NaN	NaN	8.5, S
'07-Oct-2022 13:00:00'	13.79166667	1	NaN	NaN	20.6561156	28.96171838	89.01009433	7.803440535	2061.223861	1945.103566	698.6917333	1.508966936	NaN	NaN	NaN	NaN	NaN	8.5, S
'07-Oct-2022 14:00:00'	13.83333333	1	18.83333333	NaN	20.64883803	28.96271493	88.967369	7.803561368	2061.288405	1945.158406	698.4926935	1.508976458	NaN	NaN	NaN	NaN	NaN	8.5, S
'07-Oct-2022 15:00:00'	13.875	1	NaN	NaN	20.63884017	28.96370083	88.9234885	7.803682202	2061.35295	1945.213246	698.2188483	1.508951156	NaN	NaN	NaN	NaN	NaN	8.5, S
'07-Oct-2022 16:00:00'	13.91666667	1	NaN	NaN	20.63006472	28.96469528	88.76538	7.803803035	2061.417495	1945.268087	697.9787826	1.508941493	NaN	NaN	NaN	NaN	NaN	8.5, S
'07-Oct-2022 17:00:00'	13.95833333	1	NaN	NaN	20.62100254	28.96572451	88.73907717	7.803923868	2061.48204	1945.322927	697.7315196	1.508927757	NaN	NaN	NaN	NaN	NaN	8.5, S
'07-Oct-2022 18:00:00'	14	1	NaN	NaN	20.61103361	28.9668025	88.7716785	7.804044702	2061.546584	1945.377768	697.4603042	1.50890182	NaN	NaN	NaN	NaN	NaN	8.5, S
'07-Oct-2022 19:00:00'	14.04166667	1	NaN	NaN	20.60144737	28.96787535	88.86537483	7.804165535	2061.611129	1945.432608	697.199579	1.508880892	NaN	NaN	NaN	NaN	NaN	8.5, S
'07-Oct-2022 20:00:00'	14.08333333	1	NaN	NaN	20.59179719	28.96894073	88.84121933	7.804286368	2061.675674	1945.487448	696.9370543	1.508859263	NaN	NaN	NaN	NaN	NaN	8.5, S
'07-Oct-2022 21:00:00'	14.125	1	NaN	NaN	20.58232145	28.97000362	88.9408385	7.804407202	2061.740218	1945.542289	696.6793482	1.508839933	NaN	NaN	NaN	NaN	NaN	8.5, S
'07-Oct-2022 22:00:00'	14.16666667	1	NaN	NaN	20.57298944	28.97101444	88.72070333	7.804528035	2061.804763	1945.597129	696.4247623	1.508823097	NaN	NaN	NaN	NaN	NaN	8.5, S
'07-Oct-2022 23:00:00'	14.20833333	1	NaN	NaN	20.56293249	28.97201709	89.0048275	7.804648868	2061.869308	1945.65197	696.1502631	1.50879709	NaN	NaN	NaN	NaN	NaN	8.5, S
'08-Oct-2022 00:00:00'	14.25	1	NaN	NaN	20.54907047	28.97314011	88.9644895	7.804769702	2061.933853	1945.70681	695.7737777	1.508720901	NaN	NaN	NaN	NaN	NaN	8.5, S
'08-Oct-2022 01:00:00'	14.29166667	1	NaN	NaN	20.53619056	28.97408778	88.6989865	7.804890535	2061.998397	1945.76165	695.4213136	1.508659455	NaN	NaN	NaN	NaN	NaN	8.5, S
'08-Oct-2022 02:00:00'	14.33333333	1	NaN	NaN	20.52518039	28.9752465	88.94573617	7.805011368	2062.062942	1945.816491	695.1237566	1.508619505	NaN	NaN	NaN	NaN	NaN	8.5, S
'08-Oct-2022 03:00:00'	14.375	1	NaN	NaN	20.51458078	28.97617242	88.78747417	7.805132202	2062.127487	1945.871331	694.83353	1.508587628	NaN	NaN	NaN	NaN	NaN	8.5, S
'08-Oct-2022 04:00:00'	14.41666667	1	NaN	NaN	20.51364361	28.97705778	88.90660867	7.805253035	2062.192031	1945.926172	694.8068148	1.508679991	NaN	NaN	NaN	NaN	NaN	8.5, S
'08-Oct-2022 05:00:00'	14.45833333	1	NaN	NaN	20.51661882	28.97793006	88.97834733	7.805373868	2062.256576	1945.981012	694.8868367	1.508822616	NaN	NaN	NaN	NaN	NaN	8.5, S
'08-Oct-2022 06:00:00'	14.5	1	NaN	NaN	20.51693361	28.97893028	88.89872417	7.805494702	2062.321121	1946.035852	694.896326	1.508929646	NaN	NaN	NaN	NaN	NaN	8.5, S
'08-Oct-2022 07:00:00'	14.54166667	1	NaN	NaN	20.51510501	28.98005738	88.95602917	7.805615535	2062.385666	1946.090693	694.8493964	1.509007711	NaN	NaN	NaN	NaN	NaN	8.5, S
'08-Oct-2022 08:00:00'	14.58333333	1	NaN	NaN	20.51137978	28.98119298	89.24496517	7.805736368	2062.45021	1946.145533	694.7507684	1.509061382	NaN	NaN	NaN	NaN	NaN	8.5, S
'08-Oct-2022 09:00:00'	14.625	1	NaN	NaN	20.50615623	28.98242022	88.83095583	7.805857202	2062.514755	1946.200374	694.6127751	1.509094778	NaN	NaN	NaN	NaN	NaN	8.5, S
'08-Oct-2022 10:00:00'	14.66666667	1	NaN	NaN	20.49788245	28.98367744	88.84679733	7.805978035	2062.5793	1946.255214	694.3919693	1.509088772	NaN	NaN	NaN	NaN	NaN	8.5, S
'08-Oct-2022 11:00:00'	14.70833333	1	NaN	NaN	20.48698876	28.98499747	88.64849333	7.806098868	2062.643844	1946.310054	694.1007341	1.50904851	NaN	NaN	NaN	NaN	NaN	8.5, S
'08-Oct-2022 12:00:00'	14.75	1	NaN	NaN	20.47471911	28.98635623	88.884058	7.806219702	2062.708389	1946.364895	693.7726935	1.508990224	NaN	NaN	NaN	NaN	NaN	8.5, S
'08-Oct-2022 13:00:00'	14.79166667	1	NaN	NaN	20.46092256	28.98778273	88.77363133	7.806340535	2062.772934	1946.419735	693.4042684	1.50891166	NaN	NaN	NaN	NaN	NaN	8.5, S
'08-Oct-2022 14:00:00'	14.83333333	1	NaN	NaN	20.44726264	28.98923034	88.857862	7.806569702	2062.837479	1946.474575	693.040094	1.508834661	NaN	NaN	NaN	NaN	NaN	8.5, S
'08-Oct-2022 15:00:00'	14.875	1	NaN	NaN	20.43639307	28.99055402	88.6412995	7.806798868	2062.902023	1946.529416	692.7500483	1.50879486	NaN	NaN	NaN	NaN	NaN	8.5, S
'08-Oct-2022 16:00:00'	14.91666667	1	NaN	NaN	20.42933639	28.99183806	88.88949667	7.807028035	2062.966568	1946.584256	692.563378	1.508804279	NaN	NaN	NaN	NaN	NaN	8.5, S
'08-Oct-2022 17:00:00'	14.95833333	1	NaN	NaN	20.4255161	28.99314718	89.103764	7.807257202	2063.031113	1946.639097	692.4654068	1.508854753	NaN	NaN	NaN	NaN	NaN	8.5, S
'08-Oct-2022 18:00:00'	15	1	NaN	NaN	20.42458947	28.99438698	88.65007317	7.807486368	2063.095657	1946.693937	692.4451442	1.508943017	NaN	NaN	NaN	NaN	NaN	8.5, S
'08-Oct-2022 19:00:00'	15.04166667	1	NaN	NaN	20.42586917	28.99555028	88.5541805	7.807715535	2063.160202	1946.748777	692.4837226	1.509060376	NaN	NaN	NaN	NaN	NaN	8.5, S
'08-Oct-2022 20:00:00'	15.08333333	1	NaN	NaN	20.42745887	28.9967293	88.48064767	7.807944702	2063.224747	1946.803618	692.5310267	1.509181509	NaN	NaN	NaN	NaN	NaN	8.5, S
'08-Oct-2022 21:00:00'	15.125	1	NaN	NaN	20.42826953	28.99793546	88.64939133	7.808173868	2063.289292	1946.858458	692.5575588	1.509292367	NaN	NaN	NaN	NaN	NaN	8.5, S
'08-Oct-2022 22:00:00'	15.16666667	1	NaN	NaN	20.42699666	28.99917799	88.63023583	7.808403035	2063.353836	1946.913299	692.5279078	1.509376171	NaN	NaN	NaN	NaN	NaN	8.5, S
'08-Oct-2022 23:00:00'	15.20833333	1	NaN	NaN	20.42289747	29.00051461	88.73892333	7.808632202	2063.418381	1946.968139	692.4228176	1.509422745	NaN	NaN	NaN	NaN	NaN	8.5, S
'09-Oct-2022 00:00:00'	15.25	1	NaN	NaN	20.41605263	29.00188892	88.6382255	7.808861368	2063.482926	1947.022979	692.243549	1.509433803	NaN	NaN	NaN	NaN	NaN	8.5, S
'09-Oct-2022 01:00:00'	15.29166667	1	NaN	NaN	20.40683928	29.00331114	88.56159267	7.809090535	2063.547471	1947.07782	692.0006	1.509414059	NaN	NaN	NaN	NaN	NaN	8.5, S
'09-Oct-2022 02:00:00'	15.33333333	1	NaN	NaN	20.39632605	29.00478039	88.58477417	7.809319702	2063.612015	1947.13266	691.7231187	1.509377191	NaN	NaN	NaN	NaN	NaN	8.5, S
'09-Oct-2022 03:00:00'	15.375	1	NaN	NaN	20.38515822	29.00619276	88.58808883	7.809548868	2063.67656	1947.187501	691.4269319	1.509332686	NaN	NaN	NaN	NaN	NaN	8.5, S
'09-Oct-2022 04:00:00'	15.41666667	1	NaN	NaN	20.37238972	29.00767222	88.71513933	7.809778035	2063.741105	1947.242341	691.0884285	1.509267008	NaN	NaN	NaN	NaN	NaN	8.5, S
'09-Oct-2022 05:00:00'	15.45833333	1	NaN	NaN	20.35686415	29.0091507	88.45504033	7.810007202	2063.805649	1947.297181	690.6750354	1.50916625	NaN	NaN	NaN	NaN	NaN	8.5, S
'09-Oct-2022 06:00:00'	15.5	1	NaN	NaN	20.3379805	29.01074039	88.57413283	7.810236368	2063.870194	1947.352022	690.1724389	1.509021469	NaN	NaN	NaN	NaN	NaN	8.5, S
'09-Oct-2022 07:00:00'	15.54166667	1	NaN	NaN	20.31640499	29.0123385	88.49808817	7.810465535	2063.934739	1947.406862	689.5971461	1.508842449	NaN	NaN	NaN	NaN	NaN	8.5, S
'09-Oct-2022 08:00:00'	15.58333333	1	NaN	NaN	20.29320254	29.01393437	88.46658983	7.810694702	2063.999284	1947.461703	688.9780378	1.508642938	NaN	NaN	NaN	NaN	NaN	8.5, S
'09-Oct-2022 09:00:00'	15.625	1	NaN	NaN	20.27069114	29.01546704	88.44004217	7.810923868	2064.063828	1947.516543	688.3770595	1.508453177	NaN	NaN	NaN	NaN	NaN	8.5, S
'09-Oct-2022 10:00:00'	15.66666667	1	NaN	NaN	20.24849944	29.01698635	88.3977645	7.811153035	2064.128373	1947.571383	687.7849535	1.508267835	NaN	NaN	NaN	NaN	NaN	8.5, S
'09-Oct-2022 11:00:00'	15.70833333	1	NaN	NaN	20.22366292	29.01850534	88.35850917	7.811382202	2064.192918	1947.626224	687.1216117	1.508049113	NaN	NaN	NaN	NaN	NaN	8.5, S
'09-Oct-2022 12:00:00'	15.75	1	NaN	NaN	20.19813823	29.02010471	88.294725	7.811611368	2064.257462	1947.681064	686.4415361	1.50782095	NaN	NaN	NaN	NaN	NaN	8.5, S
'09-Oct-2022 13:00:00'	15.79166667	1	NaN	NaN	20.17511699	29.02159136	88.31772933	7.811840535	2064.322007	1947.735905	685.8278111	1.507626113	NaN	NaN	NaN	NaN	NaN	8.5, S
'09-Oct-2022 14:00:00'	15.83333333	1	NaN	NaN	20.15443343	29.02289579	88.22930283	7.811882202	2064.386552	1947.790745	685.2746305	1.507463256	NaN	NaN	NaN	NaN	NaN	8.5, S
'09-Oct-2022 15:00:00'	15.875	1	NaN	NaN	20.13773546	29.02435402	88.30891033	7.811923868	2064.451097	1947.845585	684.8320896	1.507349192	NaN	NaN	NaN	NaN	NaN	8.5, S
'09-Oct-2022 16:00:00'	15.91666667	1	NaN	NaN	20.12664639	29.02571056	88.264689	7.811965535	2064.515641	1947.900426	684.5395187	1.507307417	NaN	NaN	NaN	NaN	NaN	8.5, S
'09-Oct-2022 17:00:00'	15.95833333	1	NaN	NaN	20.11985352	29.02697944	88.30091117	7.812007202	2064.580186	1947.955266	684.3615546	1.507321081	NaN	NaN	NaN	NaN	NaN	8.5, S
'09-Oct-2022 18:00:00'	16	1	NaN	NaN	20.11648338	29.02819335	88.25878017	7.812048868	2064.644731	1948.010106	684.2750967	1.507378713	NaN	NaN	NaN	NaN	NaN	8.5, S
'09-Oct-2022 19:00:00'	16.04166667	1	NaN	NaN	20.11047967	29.02957326	88.18095183	7.812090535	2064.709275	1948.064947	684.1203727	1.507401061	NaN	NaN	NaN	NaN	NaN	8.5, S
'09-Oct-2022 20:00:00'	16.08333333	1	NaN	NaN	20.1031514	29.03095197	88.20378017	7.812132202	2064.77382	1948.119787	683.9299132	1.507406682	NaN	NaN	NaN	NaN	NaN	8.5, S
'09-Oct-2022 21:00:00'	16.125	1	NaN	NaN	20.09895877	29.0322663	88.257718	7.812173868	2064.838365	1948.174628	683.8230111	1.507452733	NaN	NaN	NaN	NaN	NaN	8.5, S
'09-Oct-2022 22:00:00'	16.16666667	1	NaN	NaN	20.09836278	29.0334	88.17789367	7.812215535	2064.90291	1948.229468	683.8101053	1.507546411	NaN	NaN	NaN	NaN	NaN	8.5, S
'09-Oct-2022 23:00:00'	16.20833333	1	NaN	NaN	20.09839185	29.0345441	88.25403967	7.812257202	2064.967454	1948.284308	683.8142432	1.507647869	NaN	NaN	NaN	NaN	NaN	8.5, S
'10-Oct-2022 00:00:00'	16.25	1	NaN	NaN	20.09914903	29.03565402	88.25483583	7.812298868	2065.031999	1948.339149	683.8374505	1.507758941	NaN	NaN	NaN	NaN	NaN	8.5, S
'10-Oct-2022 01:00:00'	16.29166667	1	NaN	NaN	20.09894139	29.03676028	88.290775	7.812340535	2065.096544	1948.393989	683.8345642	1.507857855	NaN	NaN	NaN	NaN	NaN	8.5, S
'10-Oct-2022 02:00:00'	16.33333333	1	NaN	NaN	20.0966831	29.0378938	88.2774735	7.812382202	2065.161088	1948.44883	683.7768102	1.507930509	NaN	NaN	NaN	NaN	NaN	8.5, S
'10-Oct-2022 03:00:00'	16.375	1	NaN	NaN	20.09190639	29.03911306	88.46109583	7.812423868	2065.225633	1948.50367	683.6525698	1.507970299	NaN	NaN	NaN	NaN	NaN	8.5, S
'10-Oct-2022 04:00:00'	16.41666667	1	NaN	NaN	20.08464778	29.04035583	88.210071	7.812465535	2065.290178	1948.55851	683.4618047	1.507978436	NaN	NaN	NaN	NaN	NaN	8.5, S
'10-Oct-2022 05:00:00'	16.45833333	1	NaN	NaN	20.07641404	29.04161096	88.27236133	7.812507202	2065.354723	1948.613351	683.2449993	1.507974118	NaN	NaN	NaN	NaN	NaN	8.5, S
'10-Oct-2022 06:00:00'	16.5	1	NaN	NaN	20.06743518	29.04294155	88.26774583	7.812548868	2065.419267	1948.668191	683.0094416	1.507959511	NaN	NaN	NaN	NaN	NaN	8.5, S
'10-Oct-2022 07:00:00'	16.54166667	1	NaN	NaN	20.05761337	29.04409499	88.26044567	7.812590535	2065.483812	1948.723032	682.7482396	1.507936385	NaN	NaN	NaN	NaN	NaN	8.5, S
'10-Oct-2022 08:00:00'	16.58333333	1	NaN	NaN	20.04792978	29.04537416	88.38271667	7.812632202	2065.548357	1948.777872	682.4929696	1.507913544	NaN	NaN	NaN	NaN	NaN	8.5, S
'10-Oct-2022 09:00:00'	16.625	1	NaN	NaN	20.03813778	29.04657833	88.20292433	7.812673868	2065.612901	1948.832712	682.2335922	1.507890257	NaN	NaN	NaN	NaN	NaN	8.5, S
'10-Oct-2022 10:00:00'	16.66666667	1	NaN	NaN	20.02799333	29.04794972	88.2486945	7.812715535	2065.677446	1948.887553	681.9676324	1.507860569	NaN	NaN	NaN	NaN	NaN	8.5, S
'10-Oct-2022 11:00:00'	16.70833333	1	NaN	NaN	20.01754045	29.04910028	88.26890417	7.812757202	2065.741991	1948.942393	681.6897284	1.507829646	NaN	NaN	NaN	NaN	NaN	8.5, S
'10-Oct-2022 12:00:00'	16.75	1	NaN	NaN	20.00682145	29.05037242	88.18073583	7.812798868	2065.806536	1948.997234	681.4068108	1.507793961	NaN	NaN	NaN	NaN	NaN	8.5, S
'10-Oct-2022 13:00:00'	16.79166667	1	NaN	NaN	19.99750526	29.05160582	88.21951267	7.812840535	2065.87108	1949.052074	681.1610672	1.507776463	NaN	NaN	NaN	NaN	NaN	8.5, S
'10-Oct-2022 14:00:00'	16.83333333	1	NaN	NaN	19.99160084	29.05275899	88.247565	7.812778035	2065.935625	1949.106914	681.0057874	1.507802955	NaN	NaN	NaN	NaN	NaN	8.5, S
'10-Oct-2022 15:00:00'	16.875	1	NaN	NaN	19.99160944	29.05379	88.26456183	7.812715535	2066.00017	1949.161755	681.0074743	1.507905447	NaN	NaN	NaN	NaN	NaN	8.5, S
'10-Oct-2022 16:00:00'	16.91666667	1	NaN	NaN	19.99317549	29.05484373	88.22634	7.812653035	2066.064714	1949.216595	681.0514302	1.508027305	NaN	NaN	2066.064714	1949.216595	NaN	8.5, S
'10-Oct-2022 17:00:00'	16.95833333	1	NaN	NaN	19.98709104	29.05604734	88.2591015	7.812590535	2066.100502	1949.274285	681.0380282	1.507755192	NaN	NaN	NaN	NaN	NaN	8.5, S
'10-Oct-2022 18:00:00'	17	1	NaN	NaN	19.97829917	29.05732833	88.27205433	7.812528035	2066.13629	1949.331976	680.9531233	1.507448087	NaN	NaN	NaN	NaN	NaN	8.5, S
'10-Oct-2022 19:00:00'	17.04166667	1	NaN	NaN	19.96721889	29.05864056	88.22047533	7.812465535	2066.172078	1949.389666	680.8072207	1.507111854	NaN	NaN	NaN	NaN	NaN	8.5, S
'10-Oct-2022 20:00:00'	17.08333333	1	NaN	NaN	19.95604958	29.05995465	88.21818867	7.812403035	2066.207866	1949.447356	680.658977	1.506774567	NaN	NaN	NaN	NaN	NaN	8.5, S
'10-Oct-2022 21:00:00'	17.125	1	NaN	NaN	19.94671504	29.06120251	88.44849633	7.812340535	2066.243654	1949.505046	680.5589558	1.506461243	NaN	NaN	NaN	NaN	NaN	8.5, S
'10-Oct-2022 22:00:00'	17.16666667	1	NaN	NaN	19.94658	29.06219083	88.3129615	7.812278035	2066.279442	1949.562737	680.7018621	1.506266799	NaN	NaN	NaN	NaN	NaN	8.5, S
'10-Oct-2022 23:00:00'	17.20833333	1	NaN	NaN	19.95540983	29.06304972	88.427548	7.812215535	2066.31523	1949.620427	681.0837211	1.506186715	NaN	NaN	NaN	NaN	NaN	8.5, S
'11-Oct-2022 00:00:00'	17.25	1	NaN	NaN	19.96710471	29.06380942	88.26997067	7.812153035	2066.351018	1949.678117	681.5412055	1.506143903	NaN	NaN	NaN	NaN	NaN	8.5, S
'11-Oct-2022 01:00:00'	17.29166667	1	NaN	NaN	19.98088719	29.06451365	88.4343185	7.812090535	2066.386806	1949.735807	682.0542466	1.50612809	NaN	NaN	NaN	NaN	NaN	8.5, S
'11-Oct-2022 02:00:00'	17.33333333	1	NaN	NaN	19.99885702	29.0650809	88.53113533	7.812028035	2066.422594	1949.793497	682.6781641	1.50616673	NaN	NaN	NaN	NaN	NaN	8.5, S
'11-Oct-2022 03:00:00'	17.375	1	NaN	NaN	20.01753186	29.06570055	88.58183	7.811965535	2066.458382	1949.851188	683.3224828	1.506213757	NaN	NaN	NaN	NaN	NaN	8.5, S
'11-Oct-2022 04:00:00'	17.41666667	1	NaN	NaN	20.03523538	29.06631337	88.4737405	7.811903035	2066.49417	1949.908878	683.9409959	1.506248737	NaN	NaN	NaN	NaN	NaN	8.5, S
'11-Oct-2022 05:00:00'	17.45833333	1	NaN	NaN	20.04996685	29.06701348	88.49306667	7.811840535	2066.529958	1949.966568	684.4811914	1.506245287	NaN	NaN	NaN	NaN	NaN	8.5, S
'11-Oct-2022 06:00:00'	17.5	1	NaN	NaN	20.06010444	29.06787	88.5847795	7.811778035	2066.565746	1950.024258	684.9002475	1.506182065	NaN	NaN	NaN	NaN	NaN	8.5, S
'11-Oct-2022 07:00:00'	17.54166667	1	NaN	NaN	20.06736111	29.06876583	88.69334383	7.811715535	2066.601534	1950.081949	685.2423016	1.506082039	NaN	NaN	NaN	NaN	NaN	8.5, S
'11-Oct-2022 08:00:00'	17.58333333	1	NaN	NaN	20.0726677	29.06963652	88.5766555	7.811653035	2066.637322	1950.139639	685.5313375	1.505957708	NaN	NaN	NaN	NaN	NaN	8.5, S
'11-Oct-2022 09:00:00'	17.625	1	NaN	NaN	20.07587972	29.07056222	88.67947167	7.811590535	2066.67311	1950.197329	685.7647474	1.505806289	NaN	NaN	NaN	NaN	NaN	8.5, S
'11-Oct-2022 10:00:00'	17.66666667	1	20.38571429	NaN	20.07758255	29.07150332	88.67447183	7.811528035	2066.708898	1950.255019	685.9576501	1.505635641	NaN	NaN	NaN	NaN	NaN	8.5, S
'11-Oct-2022 11:00:00'	17.70833333	1	20.6125	NaN	20.07732303	29.0724618	88.6918015	7.811465535	2066.744686	1950.31271	686.0977825	1.505440021	NaN	NaN	NaN	NaN	NaN	8.5, S
'11-Oct-2022 12:00:00'	17.75	1	20.79166667	NaN	20.08086045	29.0733039	88.60781933	7.811403035	2066.780474	1950.3704	686.3387726	1.505293732	NaN	NaN	NaN	NaN	NaN	8.5, S
'11-Oct-2022 13:00:00'	17.79166667	1	20.66666667	NaN	20.09271111	29.07400611	88.8950835	7.811340535	2066.816262	1950.42809	686.8026648	1.505254105	NaN	NaN	NaN	NaN	NaN	8.5, S
'11-Oct-2022 14:00:00'	17.83333333	1	20.3	NaN	20.10734141	29.07464732	NaN	7.811200952	2066.85205	1950.48578	687.3411539	1.505250373	NaN	NaN	NaN	NaN	NaN	8.5, S
'11-Oct-2022 15:00:00'	17.875	1	19.55	NaN	20.12347361	29.07533194	NaN	7.811061368	2066.887838	1950.54347	687.9214993	1.505265193	NaN	NaN	NaN	NaN	2073.142829	8.5, S
'11-Oct-2022 16:00:00'	17.91666667	1	19.15833333	NaN	20.14224278	29.07590278	NaN	7.810921785	2066.923626	1950.601161	688.5719335	1.505314809	NaN	NaN	NaN	NaN	NaN	8.5, S
'11-Oct-2022 17:00:00'	17.95833333	1	19.53333333	NaN	20.15867669	29.07655702	NaN	7.810782202	2066.959414	1950.658851	689.1608698	1.50533401	NaN	NaN	NaN	NaN	NaN	8.5, S
'11-Oct-2022 18:00:00'	18	1	20.18888889	NaN	20.16859583	29.07753833	NaN	7.810642618	2066.995202	1950.716541	689.5786956	1.505266959	NaN	NaN	NaN	NaN	NaN	8.5, S
'11-Oct-2022 19:00:00'	18.04166667	1	20.525	NaN	20.16853861	29.0786625	NaN	7.810503035	2067.03099	1950.774231	689.7278714	1.505071949	NaN	NaN	NaN	NaN	NaN	8.5, S
'11-Oct-2022 20:00:00'	18.08333333	1	20.625	NaN	20.16491517	29.07977865	NaN	7.810363452	2067.066778	1950.831922	689.7799609	1.504831913	NaN	NaN	NaN	NaN	NaN	8.5, S
'11-Oct-2022 21:00:00'	18.125	1	20.76666667	NaN	20.16951699	29.08065237	NaN	7.810223868	2067.102566	1950.889612	690.0516446	1.504698861	NaN	NaN	NaN	NaN	NaN	8.5, S
'11-Oct-2022 22:00:00'	18.16666667	1	20.8	NaN	20.18507611	29.08120806	NaN	7.810084285	2067.138354	1950.947302	690.6162281	1.504708305	NaN	NaN	NaN	NaN	NaN	8.5, S
'11-Oct-2022 23:00:00'	18.20833333	1	20.8	NaN	20.20451573	29.08171124	NaN	7.809944702	2067.174142	1951.004992	691.2860354	1.504767619	NaN	NaN	NaN	NaN	NaN	8.5, S
'12-Oct-2022 00:00:00'	18.25	1	20.8	NaN	20.22408333	29.08224861	NaN	7.809805118	2067.20993	1951.062682	691.9604824	1.50482829	NaN	NaN	NaN	NaN	NaN	8.5, S
'12-Oct-2022 01:00:00'	18.29166667	1	20.93333333	NaN	20.24009483	29.08257759	NaN	7.809665535	2067.245718	1951.120373	692.5348997	1.50484646	NaN	NaN	NaN	NaN	NaN	8.5, S
'12-Oct-2022 02:00:00'	18.33333333	1	21	NaN	20.25481482	29.09729757	NaN	7.809525952	2067.281506	1951.178063	693.3208082	1.504678087	NaN	NaN	NaN	NaN	NaN	8.5, S
'12-Oct-2022 03:00:00'	18.375	1	21	NaN	20.2695348	29.11201756	NaN	7.809386368	2067.317294	1951.235753	694.1074641	1.504509755	NaN	NaN	NaN	NaN	NaN	8.5, S
'12-Oct-2022 04:00:00'	18.41666667	1	20.96666667	NaN	20.28425479	29.12673755	NaN	7.809246785	2067.353082	1951.293443	694.8948679	1.504341463	NaN	NaN	NaN	NaN	NaN	8.5, S
'12-Oct-2022 05:00:00'	18.45833333	1	20.76666667	NaN	20.29897478	29.14145754	NaN	7.809107202	2067.38887	1951.351134	695.6830201	1.504173211	NaN	NaN	NaN	NaN	NaN	8.5, S
'12-Oct-2022 06:00:00'	18.5	1	20.43636364	NaN	20.31369477	29.15617753	NaN	7.808967618	2067.424658	1951.408824	696.4719214	1.504004999	NaN	NaN	NaN	NaN	NaN	8.5, S
'12-Oct-2022 07:00:00'	18.54166667	1	20.16666667	NaN	20.32841476	29.17089751	NaN	7.808828035	2067.460446	1951.466514	697.2615721	1.503836827	NaN	NaN	NaN	NaN	NaN	8.5, S
'12-Oct-2022 08:00:00'	18.58333333	1	20.06666667	NaN	20.34313474	29.1856175	NaN	7.808688452	2067.496234	1951.524204	698.051973	1.503668694	NaN	NaN	NaN	NaN	NaN	8.5, S
'12-Oct-2022 09:00:00'	18.625	1	20	NaN	20.35785473	29.20033749	NaN	7.808548868	2067.532022	1951.581895	698.8431246	1.503500601	NaN	NaN	NaN	NaN	NaN	8.5, S
'12-Oct-2022 10:00:00'	18.66666667	1	19.95	NaN	20.37257472	29.21505748	NaN	7.808409285	2067.56781	1951.639585	699.6350274	1.503332547	NaN	NaN	NaN	NaN	NaN	8.5, S
'12-Oct-2022 11:00:00'	18.70833333	1	19.75833333	NaN	20.38729471	29.22977747	NaN	7.808269702	2067.603598	1951.697275	700.4276821	1.503164532	NaN	NaN	NaN	NaN	NaN	8.5, S
'12-Oct-2022 12:00:00'	18.75	1	19.325	NaN	20.40201469	29.24449745	NaN	7.808130118	2067.639386	1951.754965	701.221089	1.502996556	NaN	NaN	NaN	NaN	NaN	8.5, S
'12-Oct-2022 13:00:00'	18.79166667	1	18.99166667	NaN	20.41673468	29.25921744	NaN	7.807990535	2067.675174	1951.812655	702.015249	1.502828618	NaN	NaN	NaN	NaN	NaN	8.5, S
'12-Oct-2022 14:00:00'	18.83333333	1	18.99090909	NaN	20.43145467	29.27393743	NaN	7.807850952	2067.710962	1951.870346	702.8101624	1.502660719	NaN	NaN	NaN	NaN	NaN	8.5, S
'12-Oct-2022 15:00:00'	18.875	1	18.85	NaN	20.43840609	29.09219446	NaN	7.807711368	2067.74675	1951.928036	699.9952911	1.504721461	NaN	NaN	NaN	NaN	NaN	8.5, S
'12-Oct-2022 16:00:00'	18.91666667	1	18.80833333	NaN	20.4314663	29.09342451	NaN	7.807571785	2067.782538	1951.985726	699.95892	1.504437441	NaN	NaN	NaN	NaN	NaN	8.5, S
'12-Oct-2022 17:00:00'	18.95833333	1	19.075	NaN	20.42245253	29.09468792	NaN	7.807432202	2067.818326	1952.043416	699.8660205	1.504126638	NaN	NaN	NaN	NaN	NaN	8.5, S
'12-Oct-2022 18:00:00'	19	1	19.46666667	NaN	20.41292083	29.09590389	NaN	7.807292618	2067.854114	1952.101107	699.7580513	1.503809864	NaN	NaN	NaN	NaN	NaN	8.5, S
'12-Oct-2022 19:00:00'	19.04166667	1	19.84166667	NaN	20.40145319	29.09712216	NaN	7.807153035	2067.889902	1952.158797	699.5968424	1.503468478	NaN	NaN	NaN	NaN	NaN	8.5, S
'12-Oct-2022 20:00:00'	19.08333333	1	20.025	NaN	20.38986695	29.09835593	NaN	7.807013452	2067.92569	1952.216487	699.4326626	1.503125492	NaN	NaN	NaN	NaN	NaN	8.5, S
'12-Oct-2022 21:00:00'	19.125	1	20.10833333	NaN	20.38332139	29.09947667	NaN	7.806873868	2067.961478	1952.274177	699.4052712	1.502848077	NaN	NaN	NaN	NaN	NaN	8.5, S
'12-Oct-2022 22:00:00'	19.16666667	1	20.2	NaN	20.38549778	29.10033778	NaN	7.806734285	2067.997266	1952.331867	699.6134665	1.50268475	NaN	NaN	NaN	NaN	NaN	8.5, S
'12-Oct-2022 23:00:00'	19.20833333	1	20.25833333	NaN	20.39333961	29.10112331	NaN	7.806594702	2068.033054	1952.389558	699.9764318	1.502594433	NaN	NaN	NaN	NaN	NaN	8.5, S
'13-Oct-2022 00:00:00'	19.25	1	20.4	NaN	20.40402833	29.101835	NaN	7.806455118	2068.068842	1952.447248	700.4167365	1.502541257	NaN	NaN	NaN	NaN	NaN	8.5, S
'13-Oct-2022 01:00:00'	19.29166667	1	20.4	NaN	20.41554778	29.102475	NaN	7.806315535	2068.10463	1952.504938	700.8789542	1.502499549	NaN	NaN	NaN	NaN	NaN	8.5, S
'13-Oct-2022 02:00:00'	19.33333333	1	20.4	NaN	20.42760197	29.10318427	NaN	7.806175952	2068.140418	1952.562628	701.3573929	1.502463885	NaN	NaN	NaN	NaN	NaN	8.5, S
'13-Oct-2022 03:00:00'	19.375	1	20.49166667	NaN	20.4403875	29.10380694	NaN	7.806036368	2068.176206	1952.620319	701.854812	1.502438617	NaN	NaN	NaN	NaN	NaN	8.5, S
'13-Oct-2022 04:00:00'	19.41666667	1	19.55833333	NaN	20.45590694	29.10438028	NaN	7.805896785	2068.211994	1952.678009	702.4272045	1.502448847	NaN	NaN	NaN	NaN	NaN	8.5, S
'13-Oct-2022 05:00:00'	19.45833333	1	18.95833333	NaN	20.47168338	29.10491718	NaN	7.805757202	2068.247782	1952.735699	703.0064801	1.502462874	NaN	NaN	NaN	NaN	NaN	8.5, S
'13-Oct-2022 06:00:00'	19.5	1	18.74	NaN	20.48845472	29.10546083	NaN	7.805617618	2068.28357	1952.793389	703.6138129	1.502489609	NaN	NaN	NaN	NaN	NaN	8.5, S
'13-Oct-2022 07:00:00'	19.54166667	1	NaN	NaN	20.50571967	29.10595042	NaN	7.805478035	2068.319358	1952.85108	704.2343317	1.502523387	NaN	NaN	NaN	NaN	NaN	8.5, S
'13-Oct-2022 08:00:00'	19.58333333	1	NaN	NaN	20.51040958	29.10671972	NaN	7.805338452	2068.355146	1952.90877	704.5118782	1.50239335	NaN	NaN	NaN	NaN	NaN	8.5, S
'13-Oct-2022 09:00:00'	19.625	1	NaN	NaN	20.50484611	29.10768222	NaN	7.805198868	2068.390934	1952.96646	704.508887	1.502130117	NaN	NaN	NaN	NaN	NaN	8.5, S
'13-Oct-2022 10:00:00'	19.66666667	1	NaN	NaN	20.49708583	29.10859944	NaN	7.805059285	2068.426722	1953.02415	704.4442769	1.501839416	NaN	NaN	NaN	NaN	NaN	8.5, S
'13-Oct-2022 11:00:00'	19.70833333	1	NaN	NaN	20.48980843	29.10948933	NaN	7.804919702	2068.46251	1953.08184	704.3925674	1.501555251	NaN	NaN	NaN	NaN	NaN	8.5, S
'13-Oct-2022 12:00:00'	19.75	1	NaN	NaN	20.48572056	29.11024389	NaN	7.804780118	2068.498298	1953.139531	704.4268337	1.501313414	NaN	NaN	NaN	NaN	NaN	8.5, S
'13-Oct-2022 13:00:00'	19.79166667	1	NaN	NaN	20.47535806	29.11115472	NaN	7.804640535	2068.534086	1953.197221	704.2900658	1.500989746	NaN	NaN	NaN	NaN	NaN	8.5, S
'13-Oct-2022 14:00:00'	19.83333333	1	NaN	NaN	20.46501493	29.11204225	NaN	7.804765535	2068.569874	1953.254911	704.1534487	1.500666675	NaN	NaN	NaN	NaN	NaN	8.5, S
'13-Oct-2022 15:00:00'	19.875	1	NaN	NaN	20.45649917	29.11285651	NaN	7.804890535	2068.605662	1953.312601	704.0661631	1.500367827	NaN	NaN	NaN	NaN	NaN	8.5, S
'13-Oct-2022 16:00:00'	19.91666667	1	NaN	NaN	20.44909136	29.11370836	NaN	7.805015535	2068.64145	1953.370292	704.0102046	1.500082706	NaN	NaN	NaN	NaN	NaN	8.5, S
'13-Oct-2022 17:00:00'	19.95833333	1	NaN	NaN	20.44349803	29.11449831	NaN	7.805140535	2068.677238	1953.427982	704.0034012	1.499821468	NaN	NaN	NaN	NaN	NaN	8.5, S
'13-Oct-2022 18:00:00'	20	1	NaN	NaN	20.43669778	29.11535278	NaN	7.805265535	2068.713026	1953.485672	703.9643092	1.499544142	NaN	NaN	NaN	NaN	NaN	8.5, S
'13-Oct-2022 19:00:00'	20.04166667	1	NaN	NaN	20.43049806	29.11613712	NaN	7.805390535	2068.748814	1953.543362	703.9406268	1.499275327	NaN	NaN	NaN	NaN	NaN	8.5, S
'13-Oct-2022 20:00:00'	20.08333333	1	NaN	NaN	20.42454901	29.11694197	NaN	7.805515535	2068.784602	1953.601053	703.9242399	1.4990095	NaN	NaN	NaN	NaN	NaN	8.5, S
'13-Oct-2022 21:00:00'	20.125	1	NaN	NaN	20.41849333	29.11772472	NaN	7.805640535	2068.82039	1953.658743	703.90452	1.498742615	NaN	NaN	NaN	NaN	NaN	8.5, S
'13-Oct-2022 22:00:00'	20.16666667	1	NaN	NaN	20.4131975	29.11844917	NaN	7.805765535	2068.856178	1953.716433	703.9048239	1.498486115	NaN	NaN	NaN	NaN	NaN	8.5, S
'13-Oct-2022 23:00:00'	20.20833333	1	NaN	NaN	20.40824129	29.11919972	NaN	7.805890535	2068.891966	1953.774123	703.9149832	1.49823366	NaN	NaN	NaN	NaN	NaN	8.5, S
'14-Oct-2022 00:00:00'	20.25	1	NaN	NaN	20.40263649	29.11994568	NaN	7.806015535	2068.927754	1953.831813	703.9071115	1.497973045	NaN	NaN	NaN	NaN	NaN	8.5, S
'14-Oct-2022 01:00:00'	20.29166667	1	NaN	NaN	20.39594333	29.12072722	NaN	7.806140535	2068.963542	1953.889504	703.8697311	1.497698219	NaN	NaN	NaN	NaN	NaN	8.5, S
'14-Oct-2022 02:00:00'	20.33333333	1	NaN	NaN	20.3884632	29.12148764	NaN	7.806265535	2068.99933	1953.947194	703.8102039	1.497413685	NaN	NaN	NaN	NaN	NaN	8.5, S
'14-Oct-2022 03:00:00'	20.375	1	NaN	NaN	20.37937167	29.12231278	NaN	7.806390535	2069.035118	1954.004884	703.7072027	1.497107979	NaN	NaN	NaN	NaN	NaN	8.5, S
'14-Oct-2022 04:00:00'	20.41666667	1	NaN	NaN	20.36957417	29.12315472	NaN	7.806515535	2069.070906	1954.062574	703.5849666	1.496793178	NaN	NaN	NaN	NaN	NaN	8.5, S
'14-Oct-2022 05:00:00'	20.45833333	1	NaN	NaN	20.36426882	29.12387837	NaN	7.806640535	2069.106694	1954.120265	703.5850011	1.496536836	NaN	NaN	NaN	NaN	NaN	8.5, S
'14-Oct-2022 06:00:00'	20.5	1	NaN	NaN	20.37006667	29.12436056	NaN	7.806765535	2069.142482	1954.177955	703.8881792	1.49642425	NaN	NaN	NaN	NaN	NaN	8.5, S
'14-Oct-2022 07:00:00'	20.54166667	1	NaN	NaN	20.37468861	29.12493111	NaN	7.806890535	2069.17827	1954.235645	704.1604455	1.496295718	NaN	NaN	NaN	NaN	NaN	8.5, S
'14-Oct-2022 08:00:00'	20.58333333	1	NaN	NaN	20.37629972	29.12560761	NaN	7.807015535	2069.214058	1954.293335	704.3512437	1.496127741	NaN	NaN	NaN	NaN	NaN	8.5, S
'14-Oct-2022 09:00:00'	20.625	1	NaN	NaN	20.37580833	29.12632694	NaN	7.807140535	2069.249846	1954.351025	704.4845856	1.495932587	NaN	NaN	NaN	NaN	NaN	8.5, S
'14-Oct-2022 10:00:00'	20.66666667	1	NaN	NaN	20.37412583	29.12710333	NaN	7.807265535	2069.285634	1954.408716	704.5859399	1.495721662	NaN	NaN	NaN	NaN	NaN	8.5, S
'14-Oct-2022 11:00:00'	20.70833333	1	19.3	NaN	20.37275955	29.12784775	NaN	7.807390535	2069.321422	1954.466406	704.6955208	1.495515141	NaN	NaN	NaN	NaN	NaN	8.5, S
'14-Oct-2022 12:00:00'	20.75	1	19.8	NaN	20.37217667	29.12861417	NaN	7.807515535	2069.35721	1954.524096	704.827217	1.495318317	NaN	NaN	NaN	NaN	NaN	8.5, S
'14-Oct-2022 13:00:00'	20.79166667	1	19.95454545	NaN	20.37328083	29.12933361	NaN	7.807640535	2069.392998	1954.581786	705.0048961	1.495143459	NaN	NaN	NaN	NaN	NaN	8.5, S
'14-Oct-2022 14:00:00'	20.83333333	1	20.31666667	NaN	20.37623437	29.13002479	NaN	7.80766866	2069.428786	1954.639477	705.2334153	1.494992407	NaN	NaN	NaN	NaN	2074.903368	8.5, S
'14-Oct-2022 15:00:00'	20.875	1	20	NaN	20.37824972	29.13074	NaN	7.807696785	2069.464574	1954.697167	705.4363991	1.49482918	NaN	NaN	2069.464574	1954.697167	NaN	8.5, S
'14-Oct-2022 16:00:00'	20.91666667	1	19.6875	NaN	20.38370917	29.1314	NaN	7.80772491	2069.494284	1954.740899	705.6891871	1.494778124	NaN	NaN	NaN	NaN	NaN	8.5, S
'14-Oct-2022 17:00:00'	20.95833333	1	19.33333333	NaN	20.39377893	29.13196292	NaN	7.807753035	2069.523993	1954.784632	706.068345	1.49478673	NaN	NaN	NaN	NaN	NaN	8.5, S
'14-Oct-2022 18:00:00'	21	1	19.57272727	NaN	20.40624694	29.13255	NaN	7.80778116	2069.553702	1954.828364	706.51471	1.494825542	NaN	NaN	NaN	NaN	NaN	8.5, S
'14-Oct-2022 19:00:00'	21.04166667	1	19.56666667	NaN	20.41268972	29.13328917	NaN	7.807809285	2069.583412	1954.872097	706.7965391	1.494786105	NaN	NaN	NaN	NaN	NaN	8.5, S
'14-Oct-2022 20:00:00'	21.08333333	1	19.54166667	NaN	20.41549831	29.13414073	NaN	7.80783741	2069.613121	1954.915829	706.9794195	1.494699211	NaN	NaN	NaN	NaN	NaN	8.5, S
'14-Oct-2022 21:00:00'	21.125	1	19.55833333	NaN	20.41399694	29.13501778	NaN	7.807865535	2069.64283	1954.959562	707.0429901	1.494557288	NaN	NaN	NaN	NaN	NaN	8.5, S
'14-Oct-2022 22:00:00'	21.16666667	1	19.41666667	NaN	20.41913528	29.13571306	NaN	7.80789366	2069.67254	1955.003294	707.287982	1.494501818	NaN	NaN	NaN	NaN	NaN	8.5, S
'14-Oct-2022 23:00:00'	21.20833333	1	19.3	NaN	20.42298338	29.13649155	NaN	7.807921785	2069.702249	1955.047027	707.4986175	1.494428999	NaN	NaN	NaN	NaN	NaN	8.5, S
'15-Oct-2022 00:00:00'	21.25	1	19.2	NaN	20.42597972	29.13728556	NaN	7.80794991	2069.731958	1955.090759	707.6858879	1.494345186	NaN	NaN	NaN	NaN	NaN	8.5, S
'15-Oct-2022 01:00:00'	21.29166667	1	19.2	NaN	20.42814958	29.13812299	NaN	7.807978035	2069.761667	1955.134492	707.8509661	1.494250373	NaN	NaN	NaN	NaN	NaN	8.5, S
'15-Oct-2022 02:00:00'	21.33333333	1	19.2	NaN	20.42758873	29.13903465	NaN	7.80800616	2069.791377	1955.178224	707.9413882	1.494120012	NaN	NaN	NaN	NaN	NaN	8.5, S
'15-Oct-2022 03:00:00'	21.375	1	19.125	NaN	20.42434556	29.13997583	NaN	7.808034285	2069.821086	1955.221957	707.9576961	1.493955245	NaN	NaN	NaN	NaN	NaN	8.5, S
'15-Oct-2022 04:00:00'	21.41666667	1	19.05	NaN	20.42123944	29.14088333	NaN	7.80806241	2069.850795	1955.265689	707.9772323	1.493792627	NaN	NaN	NaN	NaN	NaN	8.5, S
'15-Oct-2022 05:00:00'	21.45833333	1	18.975	NaN	20.41807408	29.14185662	NaN	7.808090535	2069.880505	1955.309422	707.9962654	1.493628504	NaN	NaN	NaN	NaN	NaN	8.5, S
'15-Oct-2022 06:00:00'	21.5	1	18.825	NaN	20.41517111	29.14277528	NaN	7.80811866	2069.910214	1955.353154	708.0216502	1.493468363	NaN	NaN	NaN	NaN	NaN	8.5, S
'15-Oct-2022 07:00:00'	21.54166667	1	18.8	NaN	20.41156694	29.14366417	NaN	7.808146785	2069.939923	1955.396886	708.0270045	1.493299684	NaN	NaN	NaN	NaN	NaN	8.5, S
'15-Oct-2022 08:00:00'	21.58333333	1	18.71666667	NaN	20.40661713	29.14461096	NaN	7.80817491	2069.969633	1955.440619	707.9959183	1.49311327	NaN	NaN	NaN	NaN	NaN	8.5, S
'15-Oct-2022 09:00:00'	21.625	1	18.775	NaN	20.40053083	29.14558361	NaN	7.808203035	2069.999342	1955.484351	707.9336566	1.492912158	NaN	NaN	NaN	NaN	NaN	8.5, S
'15-Oct-2022 10:00:00'	21.66666667	1	19.05	NaN	20.39288556	29.14659667	NaN	7.80823116	2070.029051	1955.528084	707.8287226	1.492690834	NaN	NaN	NaN	NaN	NaN	8.5, S
'15-Oct-2022 11:00:00'	21.70833333	1	19.375	NaN	20.38675241	29.14733012	NaN	7.808259285	2070.058761	1955.571816	707.7610046	1.492491981	NaN	NaN	NaN	NaN	NaN	8.5, S
'15-Oct-2022 12:00:00'	21.75	1	18.9	NaN	20.38564318	29.14825201	NaN	7.80828741	2070.08847	1955.615549	707.8363453	1.492354651	NaN	NaN	NaN	NaN	NaN	8.5, S
'15-Oct-2022 13:00:00'	21.79166667	1	18.56666667	NaN	20.38453395	29.1491739	NaN	7.808315535	2070.118179	1955.659281	707.9116944	1.49221733	NaN	NaN	NaN	NaN	NaN	8.5, S
'15-Oct-2022 14:00:00'	21.83333333	1	18.425	NaN	20.38342472	29.15009578	NaN	7.80834366	2070.147889	1955.703014	707.987052	1.492080017	NaN	NaN	NaN	NaN	NaN	8.5, S
'15-Oct-2022 15:00:00'	21.875	1	18.4	NaN	20.38231549	29.15101767	NaN	7.808371785	2070.177598	1955.746746	708.062418	1.491942713	NaN	NaN	NaN	NaN	NaN	8.5, S
'15-Oct-2022 16:00:00'	21.91666667	1	18.45833333	NaN	20.38120626	29.15193956	NaN	7.80839991	2070.207307	1955.790479	708.1377924	1.491805417	NaN	NaN	NaN	NaN	NaN	8.5, S
'15-Oct-2022 17:00:00'	21.95833333	1	18.55833333	NaN	20.38009704	29.15286145	NaN	7.808428035	2070.237017	1955.834211	708.2131753	1.49166813	NaN	NaN	NaN	NaN	NaN	8.5, S
'15-Oct-2022 18:00:00'	22	1	18.99166667	NaN	20.37898781	29.15378334	NaN	7.80845616	2070.266726	1955.877944	708.2885666	1.49153085	NaN	NaN	NaN	NaN	NaN	8.5, S
'15-Oct-2022 19:00:00'	22.04166667	1	19.2	NaN	20.37787858	29.15470522	NaN	7.808484285	2070.296435	1955.921676	708.3639664	1.49139358	NaN	NaN	NaN	NaN	NaN	8.5, S
'15-Oct-2022 20:00:00'	22.08333333	1	19.325	NaN	20.37676935	29.15562711	NaN	7.80851241	2070.326145	1955.965409	708.4393746	1.491256317	NaN	NaN	NaN	NaN	NaN	8.5, S
'15-Oct-2022 21:00:00'	22.125	1	19.43333333	NaN	20.37566012	29.156549	NaN	7.808540535	2070.355854	1956.009141	708.5147913	1.491119064	NaN	NaN	NaN	NaN	NaN	8.5, S
'15-Oct-2022 22:00:00'	22.16666667	1	19.5	NaN	20.37455089	29.15747089	NaN	7.80856866	2070.385563	1956.052874	708.5902164	1.490981818	NaN	NaN	NaN	NaN	NaN	8.5, S
'15-Oct-2022 23:00:00'	22.20833333	1	19.5	NaN	20.37344166	29.15839278	NaN	7.808596785	2070.415273	1956.096606	708.6656499	1.490844581	NaN	NaN	NaN	NaN	NaN	8.5, S
'16-Oct-2022 00:00:00'	22.25	1	19.58333333	NaN	20.37233243	29.15931466	NaN	7.80862491	2070.444982	1956.140339	708.7410919	1.490707352	NaN	NaN	NaN	NaN	NaN	8.5, S
'16-Oct-2022 01:00:00'	22.29166667	1	19.6	NaN	20.3712232	29.16023655	NaN	7.808653035	2070.474691	1956.184071	708.8165424	1.490570132	NaN	NaN	NaN	NaN	NaN	8.5, S
'16-Oct-2022 02:00:00'	22.33333333	1	19.6	NaN	20.37011397	29.16115844	NaN	7.80868116	2070.504401	1956.227804	708.8920013	1.49043292	NaN	NaN	NaN	NaN	NaN	8.5, S
'16-Oct-2022 03:00:00'	22.375	1	19.6	NaN	20.36900475	29.16208033	NaN	7.808709285	2070.53411	1956.271536	708.9674686	1.490295717	NaN	NaN	NaN	NaN	NaN	8.5, S
'16-Oct-2022 04:00:00'	22.41666667	1	19.53333333	NaN	20.36789552	29.16300222	NaN	7.80873741	2070.563819	1956.315268	709.0429444	1.490158522	NaN	NaN	NaN	NaN	NaN	8.5, S
'16-Oct-2022 05:00:00'	22.45833333	1	19.35833333	NaN	20.36678629	29.1639241	NaN	7.808765535	2070.593529	1956.359001	709.1184287	1.490021335	NaN	NaN	NaN	NaN	NaN	8.5, S
'16-Oct-2022 06:00:00'	22.5	1	19.29166667	NaN	20.36567706	29.16484599	NaN	7.80879366	2070.623238	1956.402733	709.1939214	1.489884157	NaN	NaN	NaN	NaN	NaN	8.5, S
'16-Oct-2022 07:00:00'	22.54166667	1	19.2	NaN	20.36456783	29.16576788	NaN	7.808821785	2070.652947	1956.446466	709.2694226	1.489746987	NaN	NaN	NaN	NaN	NaN	8.5, S
'16-Oct-2022 08:00:00'	22.58333333	1	19.2	NaN	20.3634586	29.16668977	NaN	7.80884991	2070.682657	1956.490198	709.3449322	1.489609826	NaN	NaN	NaN	NaN	NaN	8.5, S
'16-Oct-2022 09:00:00'	22.625	1	19.2	NaN	20.36234937	29.16761166	NaN	7.808878035	2070.712366	1956.533931	709.4204503	1.489472673	NaN	NaN	NaN	NaN	NaN	8.5, S
'16-Oct-2022 10:00:00'	22.66666667	1	19.225	NaN	20.36124014	29.16853354	NaN	7.80890616	2070.742075	1956.577663	709.4959768	1.489335529	NaN	NaN	NaN	NaN	NaN	8.5, S
'16-Oct-2022 11:00:00'	22.70833333	1	19.38333333	NaN	20.36013091	29.16945543	NaN	7.808934285	2070.771785	1956.621396	709.5715118	1.489198392	NaN	NaN	NaN	NaN	NaN	8.5, S
'16-Oct-2022 12:00:00'	22.75	1	19.68333333	NaN	20.35902168	29.17037732	NaN	7.80896241	2070.801494	1956.665128	709.6470553	1.489061265	NaN	NaN	NaN	NaN	NaN	8.5, S
'16-Oct-2022 13:00:00'	22.79166667	1	20.03333333	NaN	20.35791246	29.17129921	NaN	7.808990535	2070.831203	1956.708861	709.7226072	1.488924146	NaN	NaN	NaN	NaN	NaN	8.5, S
'16-Oct-2022 14:00:00'	22.83333333	1	20.1	NaN	20.35680323	29.1722211	NaN	7.80901866	2070.860913	1956.752593	709.7981676	1.488787035	NaN	NaN	NaN	NaN	NaN	8.5, S
'16-Oct-2022 15:00:00'	22.875	1	19.975	NaN	20.355694	29.17314298	NaN	7.809046785	2070.890622	1956.796326	709.8737364	1.488649932	NaN	NaN	NaN	NaN	NaN	8.5, S
'16-Oct-2022 16:00:00'	22.91666667	1	19.78333333	NaN	20.35458477	29.17406487	NaN	7.80907491	2070.920331	1956.840058	709.9493137	1.488512838	NaN	NaN	NaN	NaN	NaN	8.5, S
'16-Oct-2022 17:00:00'	22.95833333	1	19.73333333	NaN	20.35347554	29.17498676	NaN	7.809103035	2070.950041	1956.883791	710.0248995	1.488375753	NaN	NaN	NaN	NaN	NaN	8.5, S
'16-Oct-2022 18:00:00'	23	1	19.8	NaN	20.35236631	29.17590865	NaN	7.80913116	2070.97975	1956.927523	710.1004937	1.488238675	NaN	NaN	NaN	NaN	NaN	8.5, S
'16-Oct-2022 19:00:00'	23.04166667	1	19.75	NaN	20.35125708	29.17683053	NaN	7.809159285	2071.009459	1956.971256	710.1760964	1.488101607	NaN	NaN	NaN	NaN	NaN	8.5, S
'16-Oct-2022 20:00:00'	23.08333333	1	19.59166667	NaN	20.35014785	29.17775242	NaN	7.80918741	2071.039169	1957.014988	710.2517076	1.487964546	NaN	NaN	NaN	NaN	NaN	8.5, S
'16-Oct-2022 21:00:00'	23.125	1	19.46666667	NaN	20.34903862	29.17867431	NaN	7.809215535	2071.068878	1957.058721	710.3273272	1.487827494	NaN	NaN	NaN	NaN	NaN	8.5, S
'16-Oct-2022 22:00:00'	23.16666667	1	19.38333333	NaN	20.34792939	29.1795962	NaN	7.80924366	2071.098587	1957.102453	710.4029553	1.487690451	NaN	NaN	NaN	NaN	NaN	8.5, S
'16-Oct-2022 23:00:00'	23.20833333	1	19.3	NaN	20.34682017	29.18051809	NaN	7.809271785	2071.128297	1957.146186	710.4785918	1.487553416	NaN	NaN	NaN	NaN	NaN	8.5, S
'17-Oct-2022 00:00:00'	23.25	1	19.3	NaN	20.34571094	29.18143997	NaN	7.80929991	2071.158006	1957.189918	710.5542369	1.487416389	NaN	NaN	NaN	NaN	NaN	8.5, S
'17-Oct-2022 01:00:00'	23.29166667	1	19.26666667	NaN	20.34460171	29.18236186	NaN	7.809328035	2071.187715	1957.23365	710.6298904	1.487279371	NaN	NaN	NaN	NaN	NaN	8.5, S
'17-Oct-2022 02:00:00'	23.33333333	1	19.13333333	NaN	20.34349248	29.18328375	NaN	7.80935616	2071.217425	1957.277383	710.7055524	1.487142361	NaN	NaN	NaN	NaN	NaN	8.5, S
'17-Oct-2022 03:00:00'	23.375	1	19.09166667	NaN	20.34238325	29.18420564	NaN	7.809384285	2071.247134	1957.321115	710.7812228	1.48700536	NaN	NaN	NaN	NaN	NaN	8.5, S
'17-Oct-2022 04:00:00'	23.41666667	1	19	NaN	20.34127402	29.18512753	NaN	7.80941241	2071.276843	1957.364848	710.8569017	1.486868367	NaN	NaN	NaN	NaN	NaN	8.5, S
'17-Oct-2022 05:00:00'	23.45833333	1	19	NaN	20.34016479	29.18604941	NaN	7.809440535	2071.306553	1957.40858	710.9325891	1.486731382	NaN	NaN	NaN	NaN	NaN	8.5, S
'17-Oct-2022 06:00:00'	23.5	1	19	NaN	20.33905556	29.1869713	NaN	7.80946866	2071.336262	1957.452313	711.008285	1.486594406	NaN	NaN	NaN	NaN	NaN	8.5, S
'17-Oct-2022 07:00:00'	23.54166667	1	19	NaN	20.33794633	29.18789319	NaN	7.809496785	2071.365971	1957.496045	711.0839894	1.486457438	NaN	NaN	NaN	NaN	NaN	8.5, S
'17-Oct-2022 08:00:00'	23.58333333	1	19.03333333	NaN	20.3368371	29.18881508	NaN	7.80952491	2071.395681	1957.539778	711.1597022	1.486320479	NaN	NaN	NaN	NaN	NaN	8.5, S
'17-Oct-2022 09:00:00'	23.625	1	19.225	NaN	20.33572788	29.18973697	NaN	7.809553035	2071.42539	1957.58351	711.2354235	1.486183528	NaN	NaN	NaN	NaN	NaN	8.5, S
'17-Oct-2022 10:00:00'	23.66666667	1	19.40833333	NaN	20.33461865	29.19065885	NaN	7.80958116	2071.455099	1957.627243	711.3111533	1.486046586	NaN	NaN	NaN	NaN	NaN	8.5, S
'17-Oct-2022 11:00:00'	23.70833333	1	19.63636364	NaN	20.33350942	29.19158074	NaN	7.809609285	2071.484808	1957.670975	711.3868915	1.485909652	NaN	NaN	NaN	NaN	NaN	8.5, S
'17-Oct-2022 12:00:00'	23.75	1	19.325	NaN	20.33240019	29.19250263	NaN	7.80963741	2071.514518	1957.714708	711.4626383	1.485772726	NaN	NaN	NaN	NaN	NaN	8.5, S
'17-Oct-2022 13:00:00'	23.79166667	1	18.9	NaN	20.33129096	29.19342452	NaN	7.809665535	2071.544227	1957.75844	711.5383935	1.485635809	NaN	NaN	NaN	NaN	NaN	8.5, S
'17-Oct-2022 14:00:00'	23.83333333	1	NaN	NaN	20.33018173	29.19434641	NaN	7.80969366	2071.573936	1957.802173	711.6141572	1.4854989	NaN	NaN	NaN	NaN	NaN	8.5, S
'17-Oct-2022 15:00:00'	23.875	1	NaN	NaN	20.3290725	29.19526829	NaN	7.809721785	2071.603646	1957.845905	711.6899294	1.485362	NaN	NaN	NaN	NaN	NaN	8.5, S
'17-Oct-2022 16:00:00'	23.91666667	1	NaN	NaN	20.32796327	29.19619018	NaN	7.80974991	2071.633355	1957.889638	711.76571	1.485225108	NaN	NaN	NaN	NaN	NaN	8.5, S
'17-Oct-2022 17:00:00'	23.95833333	1	NaN	NaN	20.32484833	29.19696222	NaN	7.809778035	2071.663064	1957.93337	711.7827753	1.485064641	NaN	NaN	NaN	NaN	2084.525962	8.5, S
'17-Oct-2022 18:00:00'	24	1	NaN	NaN	20.31559444	29.19792833	89.67044967	7.80980616	2071.692774	1957.977103	711.6315146	1.484824494	NaN	NaN	2071.692774	1957.977103	NaN	8.5, S
'17-Oct-2022 19:00:00'	24.04166667	1	NaN	NaN	20.30482416	29.19893062	88.54875567	7.809834285	2071.731512	1957.954564	711.0416802	1.485239443	NaN	NaN	NaN	NaN	NaN	8.5, S
'17-Oct-2022 20:00:00'	24.08333333	1	NaN	NaN	20.29409083	29.1998675	88.456691	7.80986241	2071.770249	1957.932025	710.4522432	1.485655672	NaN	NaN	NaN	NaN	NaN	8.5, S
'17-Oct-2022 21:00:00'	24.125	1	NaN	NaN	20.28538556	29.20073167	88.85125783	7.809890535	2071.808987	1957.909487	709.9186456	1.486098372	NaN	NaN	NaN	NaN	NaN	8.5, S
'17-Oct-2022 22:00:00'	24.16666667	1	NaN	NaN	20.27497331	29.20162388	88.59353833	7.80991866	2071.847725	1957.886948	709.3383553	1.486519277	NaN	NaN	NaN	NaN	NaN	8.5, S
'17-Oct-2022 23:00:00'	24.20833333	1	NaN	NaN	20.26494222	29.20250444	88.4867765	7.809946785	2071.886462	1957.864409	708.7689775	1.48694518	NaN	NaN	NaN	NaN	NaN	8.5, S
'18-Oct-2022 00:00:00'	24.25	1	NaN	NaN	20.25558639	29.20333861	89.13142467	7.80997491	2071.9252	1957.841871	708.2180772	1.487380186	NaN	NaN	NaN	NaN	NaN	8.5, S
'18-Oct-2022 01:00:00'	24.29166667	1	NaN	NaN	20.25285899	29.20404045	88.65996783	7.810003035	2071.963938	1957.819332	707.8498401	1.487900325	NaN	NaN	NaN	NaN	NaN	8.5, S
'18-Oct-2022 02:00:00'	24.33333333	1	NaN	NaN	20.25242417	29.2047975	88.5159155	7.81003116	2072.002676	1957.796794	707.5466023	1.488448781	NaN	NaN	NaN	NaN	NaN	8.5, S
'18-Oct-2022 03:00:00'	24.375	1	NaN	NaN	20.25316083	29.205515	89.6793885	7.810059285	2072.041413	1957.774255	707.2754549	1.489012527	NaN	NaN	NaN	NaN	NaN	8.5, S
'18-Oct-2022 04:00:00'	24.41666667	1	NaN	NaN	20.25476096	29.20624466	88.62782033	7.81008741	2072.080151	1957.751716	707.0286957	1.48958709	NaN	NaN	NaN	NaN	NaN	8.5, S
'18-Oct-2022 05:00:00'	24.45833333	1	NaN	NaN	20.25659417	29.20693806	88.50059633	7.810115535	2072.118889	1957.729178	706.7879354	1.490165086	NaN	NaN	NaN	NaN	NaN	8.5, S
'18-Oct-2022 06:00:00'	24.5	1	NaN	NaN	20.25732167	29.207705	88.60022917	7.81014366	2072.157627	1957.706639	706.5178665	1.490728346	NaN	NaN	NaN	NaN	NaN	8.5, S
'18-Oct-2022 07:00:00'	24.54166667	1	NaN	NaN	20.25347275	29.20860337	88.6385865	7.810171785	2072.196364	1957.6841	706.1231111	1.491232385	NaN	NaN	NaN	NaN	NaN	8.5, S
'18-Oct-2022 08:00:00'	24.58333333	1	NaN	NaN	20.24524694	29.20970056	88.61827283	7.81019991	2072.235102	1957.661562	705.6105618	1.491678924	NaN	NaN	NaN	NaN	NaN	8.5, S
'18-Oct-2022 09:00:00'	24.625	1	NaN	NaN	20.23356694	29.21094389	88.99956	7.810228035	2072.27384	1957.639023	705.0051256	1.492080228	NaN	NaN	NaN	NaN	NaN	8.5, S
'18-Oct-2022 10:00:00'	24.66666667	1	NaN	NaN	20.22	29.21223062	89.00419917	7.81025616	2072.312578	1957.616484	704.3486696	1.492457286	NaN	NaN	NaN	NaN	NaN	8.5, S
'18-Oct-2022 11:00:00'	24.70833333	1	NaN	NaN	20.20446278	29.21356333	89.331954	7.810284285	2072.351315	1957.593946	703.6390549	1.492809036	NaN	NaN	NaN	NaN	NaN	8.5, S
'18-Oct-2022 12:00:00'	24.75	1	NaN	NaN	20.18723694	29.21500028	88.835091	7.81031241	2072.390053	1957.571407	702.88522	1.493138373	NaN	NaN	NaN	NaN	NaN	8.5, S
'18-Oct-2022 13:00:00'	24.79166667	1	NaN	NaN	20.16897135	29.21647135	88.58225783	7.810340535	2072.428791	1957.548869	702.1040127	1.493454314	NaN	NaN	NaN	NaN	NaN	8.5, S
'18-Oct-2022 14:00:00'	24.83333333	1	NaN	NaN	20.15178167	29.21791917	88.93693583	7.810553035	2072.467529	1957.52633	701.3529475	1.493784185	NaN	NaN	NaN	NaN	2078.869301	8.5, S
'18-Oct-2022 15:00:00'	24.875	1	NaN	NaN	20.13488139	29.21938444	88.932113	7.810765535	2072.506266	1957.503791	700.6109436	1.494117595	NaN	NaN	NaN	NaN	NaN	8.5, S
'18-Oct-2022 16:00:00'	24.91666667	1	NaN	NaN	20.11937528	29.22088904	89.235864	7.810978035	2072.545004	1957.481253	699.9088089	1.494468185	NaN	NaN	NaN	NaN	NaN	8.5, S
'18-Oct-2022 17:00:00'	24.95833333	1	NaN	NaN	20.10848056	29.22228361	89.072601	7.811190535	2072.583742	1957.458714	699.332493	1.494878155	NaN	NaN	NaN	NaN	NaN	8.5, S
'18-Oct-2022 18:00:00'	25	1	NaN	NaN	20.10119	29.22363139	88.8580855	7.811403035	2072.62248	1957.436175	698.855085	1.495334063	NaN	NaN	NaN	NaN	NaN	8.5, S
'18-Oct-2022 19:00:00'	25.04166667	1	NaN	NaN	20.09669298	29.22492556	88.69699933	7.811615535	2072.661217	1957.413637	698.4539843	1.495825783	NaN	NaN	NaN	NaN	NaN	8.5, S
'18-Oct-2022 20:00:00'	25.08333333	1	NaN	NaN	20.09202083	29.22624611	89.2852655	7.811828035	2072.699955	1957.391098	698.0487985	1.496315032	NaN	NaN	NaN	NaN	NaN	8.5, S
'18-Oct-2022 21:00:00'	25.125	1	NaN	NaN	20.08574389	29.22763111	89.239429	7.812040535	2072.738693	1957.368559	697.6008892	1.496783378	NaN	NaN	NaN	NaN	NaN	8.5, S
'18-Oct-2022 22:00:00'	25.16666667	1	NaN	NaN	20.07661545	29.22907331	88.89297517	7.812253035	2072.77743	1957.346021	697.0759581	1.497215225	NaN	NaN	NaN	NaN	NaN	8.5, S
'18-Oct-2022 23:00:00'	25.20833333	1	NaN	NaN	20.06558222	29.23052722	88.612286	7.812465535	2072.816168	1957.323482	696.4993629	1.497623023	NaN	NaN	NaN	NaN	NaN	8.5, S
'19-Oct-2022 00:00:00'	25.25	1	NaN	NaN	20.05402618	29.23200446	89.537619	7.812678035	2072.854906	1957.300944	695.9093209	1.498024028	NaN	NaN	NaN	NaN	NaN	8.5, S
'19-Oct-2022 01:00:00'	25.29166667	1	NaN	NaN	20.04251176	29.23346947	89.19275933	7.812890535	2072.893644	1957.278405	695.3207239	1.498425755	NaN	NaN	NaN	NaN	NaN	8.5, S
'19-Oct-2022 02:00:00'	25.33333333	1	NaN	NaN	20.0298375	29.23492389	89.33186567	7.813103035	2072.932381	1957.255866	694.7006906	1.498813084	NaN	NaN	NaN	NaN	NaN	8.5, S
'19-Oct-2022 03:00:00'	25.375	1	NaN	NaN	20.01464806	29.23639889	88.85528667	7.813315535	2072.971119	1957.233328	694.0127381	1.499168632	NaN	NaN	NaN	NaN	NaN	8.5, S
'19-Oct-2022 04:00:00'	25.41666667	1	NaN	NaN	19.99733904	29.23791096	88.7975245	7.813528035	2073.009857	1957.210789	693.2681383	1.499497206	NaN	NaN	NaN	NaN	NaN	8.5, S
'19-Oct-2022 05:00:00'	25.45833333	1	NaN	NaN	19.97809444	29.23954389	89.33055083	7.813740535	2073.048595	1957.18825	692.4735045	1.499800164	NaN	NaN	NaN	NaN	NaN	8.5, S
'19-Oct-2022 06:00:00'	25.5	1	NaN	NaN	19.95709639	29.24122611	88.66173667	7.813953035	2073.087332	1957.165712	691.6327343	1.500080663	NaN	NaN	NaN	NaN	NaN	8.5, S
'19-Oct-2022 07:00:00'	25.54166667	1	NaN	NaN	19.93449352	29.24288817	88.64067933	7.814165535	2073.12607	1957.143173	690.7488417	1.500341419	NaN	NaN	NaN	NaN	NaN	8.5, S
'19-Oct-2022 08:00:00'	25.58333333	1	NaN	NaN	19.91114598	29.24454349	88.97134567	7.814378035	2073.164808	1957.120635	689.8456148	1.500593086	NaN	NaN	NaN	NaN	NaN	8.5, S
'19-Oct-2022 09:00:00'	25.625	1	NaN	NaN	19.88706222	29.24618222	88.6596485	7.814590535	2073.203546	1957.098096	688.9231829	1.500835904	NaN	NaN	NaN	NaN	NaN	8.5, S
'19-Oct-2022 10:00:00'	25.66666667	1	NaN	NaN	19.86177612	29.24780169	88.878537	7.814803035	2073.242283	1957.075557	687.9689085	1.501064089	NaN	NaN	NaN	NaN	NaN	8.5, S
'19-Oct-2022 11:00:00'	25.70833333	1	NaN	NaN	19.83506769	29.2494351	89.08329283	7.815015535	2073.281021	1957.053019	686.9775019	1.501274529	NaN	NaN	NaN	NaN	NaN	8.5, S
'19-Oct-2022 12:00:00'	25.75	1	NaN	NaN	19.80769252	29.25106399	88.88617767	7.815228035	2073.319759	1957.03048	685.9692624	1.501476923	NaN	NaN	NaN	NaN	NaN	8.5, S
'19-Oct-2022 13:00:00'	25.79166667	1	NaN	NaN	19.78017437	29.25274479	88.756614	7.815440535	2073.358497	1957.007941	684.9593832	1.501677165	NaN	NaN	NaN	NaN	NaN	8.5, S
'19-Oct-2022 14:00:00'	25.83333333	1	NaN	NaN	19.75331639	29.25442333	88.808934	7.815811368	2073.397234	1956.985403	683.9686662	1.501885917	NaN	NaN	NaN	NaN	NaN	8.5, S
'19-Oct-2022 15:00:00'	25.875	1	NaN	NaN	19.7287532	29.25610418	88.62457933	7.816182202	2073.435972	1956.962864	683.0412475	1.50212349	NaN	NaN	NaN	NaN	NaN	8.5, S
'19-Oct-2022 16:00:00'	25.91666667	1	NaN	NaN	19.70773221	29.2577549	88.6815145	7.816553035	2073.47471	1956.940325	682.2100035	1.502405754	NaN	NaN	NaN	NaN	NaN	8.5, S
'19-Oct-2022 17:00:00'	25.95833333	1	NaN	NaN	19.690665	29.25936944	88.6124145	7.816923868	2073.513448	1956.917787	681.4856235	1.502737838	NaN	NaN	NaN	NaN	NaN	8.5, S
'19-Oct-2022 18:00:00'	26	1	NaN	NaN	19.67666389	29.26094556	88.99911383	7.817294702	2073.552185	1956.895248	680.8438811	1.503108653	NaN	NaN	NaN	NaN	NaN	8.5, S
'19-Oct-2022 19:00:00'	26.04166667	1	NaN	NaN	19.6643986	29.26242893	88.5649065	7.817665535	2073.590923	1956.87271	680.2478763	1.503502242	NaN	NaN	NaN	NaN	NaN	8.5, S
'19-Oct-2022 20:00:00'	26.08333333	1	NaN	NaN	19.65154528	29.26397278	88.7623655	7.818036368	2073.629661	1956.850171	679.6376123	1.503887858	NaN	NaN	NaN	NaN	NaN	8.5, S
'19-Oct-2022 21:00:00'	26.125	1	NaN	NaN	19.63716667	29.26551889	88.73187883	7.818407202	2073.668398	1956.827632	678.9869729	1.504254527	NaN	NaN	NaN	NaN	NaN	8.5, S
'19-Oct-2022 22:00:00'	26.16666667	1	NaN	NaN	19.62127155	29.26706648	88.824309	7.818778035	2073.707136	1956.805094	678.2962814	1.504602387	NaN	NaN	NaN	NaN	NaN	8.5, S
'19-Oct-2022 23:00:00'	26.20833333	1	NaN	NaN	19.60450637	29.26866759	89.17079917	7.819148868	2073.745874	1956.782555	677.5838474	1.504938882	NaN	NaN	NaN	NaN	NaN	8.5, S
'20-Oct-2022 00:00:00'	26.25	1	NaN	NaN	19.5874	29.27021611	88.87834283	7.819519702	2073.784612	1956.760016	676.8621202	1.505271849	NaN	NaN	NaN	NaN	NaN	8.5, S
'20-Oct-2022 01:00:00'	26.29166667	1	NaN	NaN	19.56910452	29.27183531	88.72632717	7.819890535	2073.823349	1956.737478	676.1104981	1.505589305	NaN	NaN	NaN	NaN	NaN	8.5, S
'20-Oct-2022 02:00:00'	26.33333333	1	NaN	NaN	19.54977812	29.27350554	88.96967667	7.820261368	2073.862087	1956.714939	675.3329685	1.505893465	NaN	NaN	NaN	NaN	NaN	8.5, S
'20-Oct-2022 03:00:00'	26.375	1	NaN	NaN	19.52979861	29.27513833	89.11396917	7.820632202	2073.900825	1956.6924	674.5382231	1.506190081	NaN	NaN	NaN	NaN	NaN	8.5, S
'20-Oct-2022 04:00:00'	26.41666667	1	NaN	NaN	19.50893014	29.27673549	88.9801585	7.821003035	2073.939563	1956.669862	673.720053	1.506476218	NaN	NaN	NaN	NaN	NaN	8.5, S
'20-Oct-2022 05:00:00'	26.45833333	1	NaN	NaN	19.4875626	29.27835983	89.11266083	7.821373868	2073.9783	1956.647323	672.8899707	1.506755987	NaN	NaN	NaN	NaN	NaN	8.5, S
'20-Oct-2022 06:00:00'	26.5	1	NaN	NaN	19.46538306	29.27993611	88.740392	7.821744702	2074.017038	1956.624785	672.0384321	1.507026408	NaN	NaN	NaN	NaN	NaN	8.5, S
'20-Oct-2022 07:00:00'	26.54166667	1	NaN	NaN	19.44185606	29.28159859	89.01353933	7.822115535	2074.055776	1956.602246	671.1535024	1.507279282	NaN	NaN	NaN	NaN	NaN	8.5, S
'20-Oct-2022 08:00:00'	26.58333333	1	NaN	NaN	19.41759695	29.28321745	88.7812305	7.822486368	2074.094514	1956.579707	670.2494854	1.507523789	NaN	NaN	NaN	NaN	NaN	8.5, S
'20-Oct-2022 09:00:00'	26.625	1	17.75	NaN	19.39296917	29.28481694	89.06058483	7.822857202	2074.133251	1956.557169	669.3364935	1.507764155	NaN	NaN	NaN	NaN	NaN	8.5, S
'20-Oct-2022 10:00:00'	26.66666667	1	18.8826087	NaN	19.36697155	29.28645324	88.75765933	7.823228035	2074.171989	1956.53463	668.3889615	1.507987351	NaN	NaN	NaN	NaN	NaN	8.5, S
'20-Oct-2022 11:00:00'	26.70833333	1	19.525	NaN	19.33907645	29.28812161	89.32564683	7.823598868	2074.210727	1956.512091	667.3929744	1.508186954	NaN	NaN	NaN	NaN	NaN	8.5, S
'20-Oct-2022 12:00:00'	26.75	1	19.91666667	NaN	19.31119444	29.28971361	88.91194683	7.823969702	2074.249465	1956.489553	666.3974262	1.508387874	NaN	NaN	NaN	NaN	NaN	8.5, S
'20-Oct-2022 13:00:00'	26.79166667	1	20.06666667	NaN	19.29011011	29.29121573	88.84808183	7.824340535	2074.288202	1956.467014	665.5812155	1.508673935	NaN	NaN	NaN	NaN	NaN	8.5, S
'20-Oct-2022 14:00:00'	26.83333333	1	20.26363636	NaN	19.2875725	29.29239694	88.68456617	7.824148868	2074.32694	1956.444475	665.2499935	1.509192618	NaN	NaN	NaN	NaN	NaN	8.5, S
'20-Oct-2022 15:00:00'	26.875	1	20.3	NaN	19.29435083	29.29342583	88.99575233	7.823957202	2074.365678	1956.421937	665.1622706	1.50982808	NaN	NaN	NaN	NaN	NaN	8.5, S
'20-Oct-2022 16:00:00'	26.91666667	1	20.225	NaN	19.30555478	29.29443371	89.48081733	7.823765535	2074.404416	1956.399398	665.1910498	1.510518528	NaN	NaN	NaN	NaN	NaN	8.5, S
'20-Oct-2022 17:00:00'	26.95833333	1	20.33333333	NaN	19.31848528	29.29544139	89.527664	7.823573868	2074.443153	1956.37686	665.2654444	1.511230464	NaN	NaN	NaN	NaN	NaN	8.5, S
'20-Oct-2022 18:00:00'	27	1	20.325	NaN	19.3335675	29.29641861	89.1586685	7.823382202	2074.481891	1956.354321	665.3961841	1.511969543	NaN	NaN	NaN	NaN	NaN	8.5, S
'20-Oct-2022 19:00:00'	27.04166667	1	20.40833333	NaN	19.34964113	29.2974231	89.53057483	7.823190535	2074.520629	1956.331782	665.5536133	1.512720781	NaN	NaN	NaN	NaN	NaN	8.5, S
'20-Oct-2022 20:00:00'	27.08333333	1	20.40833333	NaN	19.36661468	29.29836898	89.179105	7.822998868	2074.559366	1956.309244	665.7339119	1.513484091	NaN	NaN	NaN	NaN	NaN	8.5, S
'20-Oct-2022 21:00:00'	27.125	1	20.44166667	NaN	19.38440833	29.29928194	90.11959117	7.822807202	2074.598104	1956.286705	665.9354089	1.514258207	NaN	NaN	NaN	NaN	NaN	8.5, S
'20-Oct-2022 22:00:00'	27.16666667	1	20.58333333	NaN	19.40299635	29.30022612	89.591433	7.822615535	2074.636842	1956.264166	666.1584977	1.51504207	NaN	NaN	NaN	NaN	NaN	8.5, S
'20-Oct-2022 23:00:00'	27.20833333	1	20.51666667	NaN	19.42265889	29.30109694	89.27038617	7.822423868	2074.67558	1956.241628	666.408868	1.515840428	NaN	NaN	NaN	NaN	NaN	8.5, S
'21-Oct-2022 00:00:00'	27.25	1	20.5	NaN	19.44274056	29.30204111	90.80538567	7.822232202	2074.714317	1956.219089	666.6716461	1.516643423	NaN	NaN	NaN	NaN	NaN	8.5, S
'21-Oct-2022 01:00:00'	27.29166667	1	20.55833333	NaN	19.46295746	29.30285549	89.40308033	7.822040535	2074.753055	1956.196551	666.9359771	1.517449968	NaN	NaN	NaN	NaN	NaN	8.5, S
'21-Oct-2022 02:00:00'	27.33333333	1	20.65833333	NaN	19.48334056	29.30372056	90.20036033	7.821848868	2074.791793	1956.174012	667.205667	1.518258294	NaN	NaN	NaN	NaN	NaN	8.5, S
'21-Oct-2022 03:00:00'	27.375	1	20.50833333	NaN	19.50433139	29.30452778	89.925164	7.821657202	2074.830531	1956.151473	667.4906047	1.519075206	NaN	NaN	NaN	NaN	NaN	8.5, S
'21-Oct-2022 04:00:00'	27.41666667	1	20.59090909	NaN	19.52552563	29.30535577	89.86401033	7.821465535	2074.869268	1956.128935	667.7814072	1.519894743	NaN	NaN	NaN	NaN	NaN	8.5, S
'21-Oct-2022 05:00:00'	27.45833333	1	20.6	NaN	19.54649917	29.30619083	89.745082	7.821273868	2074.908006	1956.106396	668.0666259	1.520711785	NaN	NaN	NaN	NaN	NaN	8.5, S
'21-Oct-2022 06:00:00'	27.5	1	20.6	NaN	19.56722798	29.30701025	89.961023	7.821082202	2074.946744	1956.083857	668.3452431	1.521526296	NaN	NaN	NaN	NaN	NaN	8.5, S
'21-Oct-2022 07:00:00'	27.54166667	1	20.73333333	NaN	19.58772753	29.30783315	90.15892217	7.820890535	2074.985482	1956.061319	668.6179794	1.522338233	NaN	NaN	NaN	NaN	NaN	8.5, S
'21-Oct-2022 08:00:00'	27.58333333	1	20.74166667	NaN	19.6082225	29.30868667	90.1688985	7.820698868	2075.024219	1956.03878	668.8912327	1.523150072	NaN	NaN	NaN	NaN	NaN	8.5, S
'21-Oct-2022 09:00:00'	27.625	1	20.75833333	NaN	19.62958333	29.30950944	90.03153083	7.820507202	2075.062957	1956.016241	669.1870551	1.523973449	NaN	NaN	NaN	NaN	NaN	8.5, S
'21-Oct-2022 10:00:00'	27.66666667	1	20.825	NaN	19.65046461	29.3103191	90.37256483	7.820315535	2075.101695	1955.993703	669.4700899	1.524791322	NaN	NaN	NaN	NaN	NaN	8.5, S
'21-Oct-2022 11:00:00'	27.70833333	1	20.98333333	NaN	19.6705125	29.31113389	90.424225	7.820123868	2075.140433	1955.971164	669.7312445	1.525599018	NaN	NaN	NaN	NaN	NaN	8.5, S
'21-Oct-2022 12:00:00'	27.75	1	21.1	NaN	19.69062306	29.31196861	90.11643917	7.819932202	2075.17917	1955.948626	669.9945161	1.526407578	NaN	NaN	NaN	NaN	NaN	8.5, S
'21-Oct-2022 13:00:00'	27.79166667	1	21.1	NaN	19.71237809	29.31273034	90.56953183	7.819740535	2075.217908	1955.926087	670.3003373	1.527238003	NaN	NaN	NaN	NaN	NaN	8.5, S
'21-Oct-2022 14:00:00'	27.83333333	1	21.15833333	NaN	19.73684067	29.31339916	90.80130233	7.819332202	2075.256646	1955.903548	670.6766433	1.528103964	NaN	NaN	NaN	NaN	NaN	8.5, S
'21-Oct-2022 15:00:00'	27.875	1	21.2	NaN	19.7634446	29.31397535	90.80469983	7.818923868	2075.295384	1955.88101	671.1084894	1.528998436	NaN	NaN	NaN	NaN	NaN	8.5, S
'21-Oct-2022 16:00:00'	27.91666667	1	21.2	NaN	19.79181517	29.31454522	91.05522117	7.818515535	2075.334121	1955.858471	671.5874381	1.529915738	NaN	NaN	NaN	NaN	2081.057343	8.5, S
'21-Oct-2022 17:00:00'	27.95833333	1	21.15	NaN	19.81987111	29.31514139	91.1119635	7.818107202	2075.372859	1955.835932	672.0587653	1.530829284	NaN	NaN	2075.372859	1955.835932	NaN	8.5, S
'21-Oct-2022 18:00:00'	28	1	21.15833333	NaN	19.84615	29.31589333	90.95267083	7.817698868	2075.406923	1955.825369	672.5660426	1.531567419	NaN	NaN	NaN	NaN	NaN	8.5, S
'21-Oct-2022 19:00:00'	28.04166667	1	21.2	NaN	19.86927135	29.31680843	90.74772017	7.817290535	2075.440987	1955.814806	672.9923076	1.532264049	NaN	NaN	NaN	NaN	NaN	8.5, S
'21-Oct-2022 20:00:00'	28.08333333	1	21.11666667	NaN	19.89082417	29.31770722	91.28190483	7.816882202	2075.475051	1955.804242	673.3767605	1.532941357	NaN	NaN	NaN	NaN	NaN	8.5, S
'21-Oct-2022 21:00:00'	28.125	1	21.09166667	NaN	19.9141075	29.31849583	90.84875983	7.816473868	2075.509115	1955.793679	673.8056784	1.533642223	NaN	NaN	NaN	NaN	NaN	8.5, S
'21-Oct-2022 22:00:00'	28.16666667	1	21.09166667	NaN	19.93874423	29.31926197	90.84598367	7.816065535	2075.543179	1955.783116	674.2705401	1.534360858	NaN	NaN	NaN	NaN	NaN	8.5, S
'21-Oct-2022 23:00:00'	28.20833333	1	21.04545455	NaN	19.96281136	29.32009529	90.93697583	7.815657202	2075.577242	1955.772552	674.7216073	1.53507181	NaN	NaN	NaN	NaN	NaN	8.5, S
'22-Oct-2022 00:00:00'	28.25	1	21.10833333	NaN	19.98763694	29.32086889	90.86721133	7.815248868	2075.611306	1955.761989	675.1921781	1.53579348	NaN	NaN	NaN	NaN	NaN	8.5, S
'22-Oct-2022 01:00:00'	28.29166667	1	21	NaN	20.01243915	29.32160592	91.11022267	7.814840535	2075.64537	1955.751426	675.6617934	1.536515675	NaN	NaN	NaN	NaN	NaN	8.5, S
'22-Oct-2022 02:00:00'	28.33333333	1	20.95833333	NaN	20.03712583	29.32232917	91.03792567	7.814432202	2075.679434	1955.740863	676.128371	1.537236942	NaN	NaN	NaN	NaN	NaN	8.5, S
'22-Oct-2022 03:00:00'	28.375	1	21.00833333	NaN	20.06160944	29.32302194	91.35345567	7.814023868	2075.713498	1955.730299	676.5892852	1.537956367	NaN	NaN	NaN	NaN	NaN	8.5, S
'22-Oct-2022 04:00:00'	28.41666667	1	21.11666667	NaN	20.08551039	29.32371657	91.29792883	7.813615535	2075.747562	1955.719736	677.0349156	1.538668708	NaN	NaN	NaN	NaN	NaN	8.5, S
'22-Oct-2022 05:00:00'	28.45833333	1	21.05	NaN	20.10835944	29.32447417	91.27503817	7.813207202	2075.781626	1955.709173	677.4537073	1.539367203	NaN	NaN	NaN	NaN	NaN	8.5, S
'22-Oct-2022 06:00:00'	28.5	1	21.11666667	NaN	20.13049081	29.32526462	91.291841	7.812798868	2075.81569	1955.698609	677.8540628	1.540056454	NaN	NaN	NaN	NaN	NaN	8.5, S
'22-Oct-2022 07:00:00'	28.54166667	1	21.18333333	NaN	20.15237199	29.3260507	91.67427783	7.812390535	2075.849754	1955.688046	678.2478524	1.540742871	NaN	NaN	NaN	NaN	NaN	8.5, S
'22-Oct-2022 08:00:00'	28.58333333	1	21.06666667	NaN	20.17338914	29.32681365	91.5917325	7.811982202	2075.883818	1955.677483	678.6183017	1.541418824	NaN	NaN	NaN	NaN	NaN	8.5, S
'22-Oct-2022 09:00:00'	28.625	1	21.14166667	NaN	20.19278726	29.32767701	92.05378667	7.811573868	2075.917881	1955.666919	678.9472201	1.542073094	NaN	NaN	NaN	NaN	NaN	8.5, S
'22-Oct-2022 10:00:00'	28.66666667	1	21.15	NaN	20.2110462	29.32857493	91.35710683	7.811165535	2075.951945	1955.656356	679.2463196	1.542712592	NaN	NaN	NaN	NaN	NaN	8.5, S
'22-Oct-2022 11:00:00'	28.70833333	1	21.3	NaN	20.22864167	29.32955972	91.76611833	7.810757202	2075.986009	1955.645793	679.5292119	1.543342737	NaN	NaN	NaN	NaN	NaN	8.5, S
'22-Oct-2022 12:00:00'	28.75	1	20.96666667	NaN	20.24567036	29.33053019	92.18277133	7.810348868	2076.020073	1955.635229	679.7967707	1.543966002	NaN	NaN	NaN	NaN	NaN	8.5, S
'22-Oct-2022 13:00:00'	28.79166667	1	20.73333333	NaN	20.26389631	29.33141392	91.48224917	7.809940535	2076.054137	1955.624666	680.0951107	1.54460592	NaN	NaN	NaN	NaN	NaN	8.5, S
'22-Oct-2022 14:00:00'	28.83333333	1	20.7	NaN	20.28440474	29.33220167	91.96015467	7.809553035	2076.088201	1955.614103	680.4532496	1.54527659	NaN	NaN	NaN	NaN	NaN	8.5, S
'22-Oct-2022 15:00:00'	28.875	1	20.7	NaN	20.30626288	29.33293269	91.5973195	7.809165535	2076.122265	1955.603539	680.8468631	1.545965602	NaN	NaN	NaN	NaN	NaN	8.5, S
'22-Oct-2022 16:00:00'	28.91666667	1	20.69166667	NaN	20.31944266	29.33405	91.50166817	7.808778035	2076.156329	1955.592976	681.0139731	1.546538417	NaN	NaN	NaN	NaN	NaN	8.5, S
'22-Oct-2022 17:00:00'	28.95833333	1	21.13333333	NaN	20.32909889	29.33532944	91.55652017	7.808390535	2076.190393	1955.582413	681.0891866	1.547063989	NaN	NaN	NaN	NaN	NaN	8.5, S
'22-Oct-2022 18:00:00'	29	1	21.3	NaN	20.33839972	29.33661551	92.11553333	7.808003035	2076.224457	1955.571849	681.1549966	1.547584992	NaN	NaN	NaN	NaN	NaN	8.5, S
'22-Oct-2022 19:00:00'	29.04166667	1	21.33333333	NaN	20.34942423	29.33780901	92.026552	7.807615535	2076.25852	1955.561286	681.2656042	1.548129449	NaN	NaN	NaN	NaN	NaN	8.5, S
'22-Oct-2022 20:00:00'	29.08333333	1	21.35833333	NaN	20.35953823	29.33898283	92.52115517	7.807228035	2076.292584	1955.550723	681.3514471	1.548662522	NaN	NaN	NaN	NaN	NaN	8.5, S
'22-Oct-2022 21:00:00'	29.125	1	21.35833333	NaN	20.37718	29.33988417	91.60595733	7.806840535	2076.326648	1955.54016	681.6351079	1.549296204	NaN	NaN	NaN	NaN	NaN	8.5, S
'22-Oct-2022 22:00:00'	29.16666667	1	21.4	NaN	20.39939691	29.3406323	91.84478317	7.806453035	2076.360712	1955.529596	682.0393616	1.549991092	NaN	NaN	NaN	NaN	NaN	8.5, S
'22-Oct-2022 23:00:00'	29.20833333	1	21.44166667	NaN	20.42145083	29.34139639	91.77534467	7.806065535	2076.394776	1955.519033	682.4397105	1.55068399	NaN	NaN	NaN	NaN	NaN	8.5, S
'23-Oct-2022 00:00:00'	29.25	1	21.38333333	NaN	20.44384039	29.3421415	92.59804833	7.805678035	2076.42884	1955.50847	682.8489837	1.551381778	NaN	NaN	NaN	NaN	NaN	8.5, S
'23-Oct-2022 01:00:00'	29.29166667	1	21.35	NaN	20.46617472	29.3429736	91.64833233	7.805290535	2076.462904	1955.497906	683.2584587	1.552078083	NaN	NaN	NaN	NaN	NaN	8.5, S
'23-Oct-2022 02:00:00'	29.33333333	1	21.43333333	NaN	20.487915	29.34377333	92.1387265	7.804903035	2076.496968	1955.487343	683.6515917	1.552767411	NaN	NaN	NaN	NaN	NaN	8.5, S
'23-Oct-2022 03:00:00'	29.375	1	21.45833333	NaN	20.5089075	29.34467306	92.17777183	7.804515535	2076.531032	1955.47678	684.0264588	1.553446093	NaN	NaN	NaN	NaN	NaN	8.5, S
'23-Oct-2022 04:00:00'	29.41666667	1	21.5	NaN	20.5301431	29.34548507	91.91060233	7.804128035	2076.565095	1955.466216	684.406581	1.554129315	NaN	NaN	NaN	NaN	NaN	8.5, S
'23-Oct-2022 05:00:00'	29.45833333	1	21.5	NaN	20.55200166	29.34623047	92.08409567	7.803740535	2076.599159	1955.455653	684.8025742	1.55482176	NaN	NaN	NaN	NaN	NaN	8.5, S
'23-Oct-2022 06:00:00'	29.5	1	21.4	NaN	20.57374639	29.34693111	92.28958233	7.803353035	2076.633223	1955.44509	685.1949374	1.555513594	NaN	NaN	NaN	NaN	NaN	8.5, S
'23-Oct-2022 07:00:00'	29.54166667	1	21.29166667	NaN	20.59659747	29.34759579	92.13451367	7.802965535	2076.667287	1955.434526	685.6167746	1.556220585	NaN	NaN	NaN	NaN	NaN	8.5, S
'23-Oct-2022 08:00:00'	29.58333333	1	21.425	NaN	20.61991643	29.34820919	92.43833067	7.802578035	2076.701351	1955.423963	686.0506128	1.556934648	NaN	NaN	NaN	NaN	NaN	8.5, S
'23-Oct-2022 09:00:00'	29.625	1	21.425	NaN	20.64252548	29.34892493	92.02873567	7.802190535	2076.735415	1955.4134	686.4672356	1.557638513	NaN	NaN	NaN	NaN	NaN	8.5, S
'23-Oct-2022 10:00:00'	29.66666667	1	21.45	NaN	20.66327809	29.34973792	92.3331425	7.801803035	2076.769479	1955.402836	686.8355169	1.558317255	NaN	NaN	NaN	NaN	NaN	8.5, S
'23-Oct-2022 11:00:00'	29.70833333	1	21.5	NaN	20.68272972	29.35050667	92.02205633	7.801415535	2076.803543	1955.392273	687.1680177	1.558979851	NaN	NaN	NaN	NaN	NaN	8.5, S
'23-Oct-2022 12:00:00'	29.75	1	21.5	NaN	20.70144652	29.35129972	92.39766167	7.801028035	2076.837607	1955.38171	687.4811902	1.559632795	NaN	NaN	NaN	NaN	NaN	8.5, S
'23-Oct-2022 13:00:00'	29.79166667	1	21.51666667	NaN	20.71928711	29.35225182	91.954708	7.800640535	2076.871671	1955.371146	687.773482	1.560272514	NaN	NaN	NaN	NaN	NaN	8.5, S
'23-Oct-2022 14:00:00'	29.83333333	1	21.51666667	NaN	20.73665861	29.353135	92.34269383	7.800598868	2076.905734	1955.360583	688.0520137	1.560907188	NaN	NaN	NaN	NaN	NaN	8.5, S
'23-Oct-2022 15:00:00'	29.875	1	21.5	NaN	20.75374401	29.35405376	92.34911183	7.800557202	2076.939798	1955.35002	688.3235131	1.561537881	NaN	NaN	NaN	NaN	NaN	8.5, S
'23-Oct-2022 16:00:00'	29.91666667	1	21.5	NaN	20.76980112	29.35494101	92.46956683	7.800515535	2076.973862	1955.339457	688.5667128	1.562155708	NaN	NaN	NaN	NaN	NaN	8.5, S
'23-Oct-2022 17:00:00'	29.95833333	1	21.475	NaN	20.78581745	29.35582327	92.27242133	7.800473868	2077.007926	1955.328893	688.8088138	1.562773256	NaN	NaN	NaN	NaN	NaN	8.5, S
'23-Oct-2022 18:00:00'	30	1	21.49166667	NaN	20.80248667	29.35668333	92.517249	7.800432202	2077.04199	1955.31833	689.068333	1.563399843	NaN	NaN	NaN	NaN	NaN	8.5, S
'23-Oct-2022 19:00:00'	30.04166667	1	21.48333333	NaN	20.81885155	29.35757352	92.65242633	7.800390535	2077.076054	1955.307767	689.3202124	1.564022255	NaN	NaN	NaN	NaN	NaN	8.5, S
'23-Oct-2022 20:00:00'	30.08333333	1	21.4	NaN	20.83406806	29.35848444	92.47708483	7.800348868	2077.110118	1955.297203	689.5413836	1.564629513	NaN	NaN	NaN	NaN	NaN	8.5, S
'23-Oct-2022 21:00:00'	30.125	1	21.41666667	NaN	20.84884432	29.35947922	92.104954	7.800307202	2077.144182	1955.28664	689.752121	1.565230095	NaN	NaN	NaN	NaN	NaN	8.5, S
'23-Oct-2022 22:00:00'	30.16666667	1	21.5	NaN	20.86299522	29.36051292	92.4101675	7.800265535	2077.178246	1955.276077	689.9466242	1.565822125	NaN	NaN	NaN	NaN	NaN	8.5, S
'23-Oct-2022 23:00:00'	30.20833333	1	21.5	NaN	20.87677577	29.36150836	92.71695217	7.800223868	2077.21231	1955.265513	690.1304864	1.566409926	NaN	NaN	NaN	NaN	NaN	8.5, S
'24-Oct-2022 00:00:00'	30.25	1	21.48333333	NaN	20.88996806	29.3624525	92.32073283	7.800182202	2077.246373	1955.25495	690.2975615	1.566990786	NaN	NaN	NaN	NaN	NaN	8.5, S
'24-Oct-2022 01:00:00'	30.29166667	1	21.49166667	NaN	20.90248123	29.36351148	92.46203083	7.800140535	2077.280437	1955.244387	690.4482147	1.56756138	NaN	NaN	NaN	NaN	NaN	8.5, S
'24-Oct-2022 02:00:00'	30.33333333	1	21.4	NaN	20.9149425	29.36452472	92.20246	7.800098868	2077.314501	1955.233823	690.5967278	1.568132007	NaN	NaN	NaN	NaN	NaN	8.5, S
'24-Oct-2022 03:00:00'	30.375	1	21.38333333	NaN	20.92798022	29.36554234	92.71403383	7.800057202	2077.348565	1955.22326	690.7610292	1.568710314	NaN	NaN	NaN	NaN	NaN	8.5, S
'24-Oct-2022 04:00:00'	30.41666667	1	21.475	NaN	20.94184845	29.3665369	92.32342567	7.800015535	2077.382629	1955.212697	690.9475613	1.569300019	NaN	NaN	NaN	NaN	NaN	8.5, S
'24-Oct-2022 05:00:00'	30.45833333	1	21.45833333	NaN	20.95561828	29.36752798	92.19875183	7.799973868	2077.416693	1955.202133	691.1314249	1.569888624	NaN	NaN	NaN	NaN	NaN	8.5, S
'24-Oct-2022 06:00:00'	30.5	1	21.40833333	NaN	20.96952333	29.36847861	92.34950083	7.799932202	2077.450757	1955.19157	691.3183362	1.570479686	NaN	NaN	NaN	NaN	NaN	8.5, S
'24-Oct-2022 07:00:00'	30.54166667	1	21.38333333	NaN	20.98329239	29.36936169	92.6130915	7.799890535	2077.484821	1955.181007	691.500458	1.571069972	NaN	NaN	NaN	NaN	NaN	8.5, S
'24-Oct-2022 08:00:00'	30.58333333	1	21.36666667	NaN	20.99684278	29.37029333	92.46247367	7.799848868	2077.518885	1955.170443	691.6775285	1.571656897	NaN	NaN	NaN	NaN	NaN	8.5, S
'24-Oct-2022 09:00:00'	30.625	1	21.45833333	NaN	21.01032576	29.37124737	92.3452605	7.799807202	2077.552949	1955.15988	691.8532113	1.572242795	NaN	NaN	NaN	NaN	NaN	8.5, S
'24-Oct-2022 10:00:00'	30.66666667	1	21.5	NaN	21.02313989	29.37220871	92.08278867	7.799765535	2077.587012	1955.149317	692.0108838	1.57281989	NaN	NaN	NaN	NaN	NaN	8.5, S
'24-Oct-2022 11:00:00'	30.70833333	1	21.55833333	NaN	21.03590696	29.37318552	92.56469867	7.799723868	2077.621076	1955.138753	692.1675962	1.573396303	NaN	NaN	NaN	NaN	NaN	8.5, S
'24-Oct-2022 12:00:00'	30.75	1	21.6	NaN	21.04893795	29.37410803	92.30406033	7.799682202	2077.65514	1955.12819	692.330614	1.573977052	NaN	NaN	NaN	NaN	NaN	8.5, S
'24-Oct-2022 13:00:00'	30.79166667	1	21.6	NaN	21.06258399	29.37507949	92.44255483	7.799640535	2077.689204	1955.117627	692.5112698	1.574565473	NaN	NaN	NaN	NaN	NaN	8.5, S
'24-Oct-2022 14:00:00'	30.83333333	1	21.6	NaN	21.07677444	29.37606194	92.15874983	7.799657202	2077.723268	1955.107064	692.7069994	1.575161132	NaN	NaN	2077.723268	1955.107064	NaN	8.5, S
'24-Oct-2022 15:00:00'	30.875	1	21.6	NaN	21.09099136	29.37689749	92.33488983	7.799673868	2077.715033	1955.07884	693.0030919	1.575517031	NaN	NaN	NaN	NaN	NaN	8.5, S
'24-Oct-2022 16:00:00'	30.91666667	1	21.6	NaN	21.10463567	29.37787472	92.36903733	7.799690535	2077.706799	1955.050617	693.2861213	1.575863602	NaN	NaN	NaN	NaN	NaN	8.5, S
'24-Oct-2022 17:00:00'	30.95833333	1	21.7	NaN	21.11881274	29.3788072	91.962016	7.799707202	2077.698564	1955.022394	693.5829962	1.576217929	NaN	NaN	NaN	NaN	NaN	8.5, S
'24-Oct-2022 18:00:00'	31	1	21.7	NaN	21.13365444	29.37962722	92.09768967	7.799723868	2077.690329	1954.994171	693.8961619	1.57658265	NaN	NaN	NaN	NaN	NaN	8.5, S
'24-Oct-2022 19:00:00'	31.04166667	1	21.7	NaN	21.14985521	29.38042197	92.17942033	7.799740535	2077.682095	1954.965948	694.2460756	1.576965896	NaN	NaN	NaN	NaN	NaN	8.5, S
'24-Oct-2022 20:00:00'	31.08333333	1	21.7	NaN	21.16625944	29.38119333	92.4342675	7.799757202	2077.67386	1954.937725	694.6012823	1.577352289	NaN	NaN	NaN	NaN	NaN	8.5, S
'24-Oct-2022 21:00:00'	31.125	1	21.7	NaN	21.18351828	29.38187922	92.44178567	7.799773868	2077.665625	1954.909501	694.9784941	1.57775131	NaN	NaN	NaN	NaN	NaN	8.5, S
'24-Oct-2022 22:00:00'	31.16666667	1	20.60833333	NaN	21.20099242	29.38264073	92.4005565	7.799790535	2077.657391	1954.881278	695.3630546	1.578152377	NaN	NaN	NaN	NaN	NaN	8.5, S
'24-Oct-2022 23:00:00'	31.20833333	1	20.01666667	NaN	21.21812479	29.38338719	92.38787117	7.799807202	2077.649156	1954.853055	695.7381912	1.578549235	NaN	NaN	NaN	NaN	NaN	8.5, S
'25-Oct-2022 00:00:00'	31.25	1	19.88333333	NaN	21.23494056	29.38412722	92.01483333	7.799823868	2077.640921	1954.824832	696.1047277	1.5789421	NaN	NaN	NaN	NaN	NaN	8.5, S
'25-Oct-2022 01:00:00'	31.29166667	1	19.775	NaN	21.25187507	29.38489664	92.20287467	7.799840535	2077.632687	1954.796609	696.4751754	1.579336317	NaN	NaN	NaN	NaN	NaN	8.5, S
'25-Oct-2022 02:00:00'	31.33333333	1	19.68333333	NaN	21.25773528	29.38593472	92.12194733	7.799857202	2077.624452	1954.768385	696.5475109	1.579579236	NaN	NaN	NaN	NaN	NaN	8.5, S
'25-Oct-2022 03:00:00'	31.375	1	19.65	NaN	21.25038496	29.38723621	92.28480367	7.799873868	2077.616217	1954.740162	696.2631752	1.579642289	NaN	NaN	NaN	NaN	NaN	8.5, S
'25-Oct-2022 04:00:00'	31.41666667	1	19.53333333	NaN	21.24162191	29.388475	91.98024667	7.799890535	2077.607983	1954.711939	695.9392607	1.579687307	NaN	NaN	NaN	NaN	NaN	8.5, S
'25-Oct-2022 05:00:00'	31.45833333	1	19.61666667	NaN	21.23132881	29.38966399	91.89649083	7.799907202	2077.599748	1954.683716	695.5728325	1.579712571	NaN	NaN	NaN	NaN	NaN	8.5, S
'25-Oct-2022 06:00:00'	31.5	1	19.44166667	NaN	21.22070528	29.39081278	92.02146283	7.799923868	2077.591513	1954.655493	695.1968649	1.579733983	NaN	NaN	NaN	NaN	NaN	8.5, S
'25-Oct-2022 07:00:00'	31.54166667	1	19.51666667	NaN	21.20934761	29.39198592	91.85231233	7.799940535	2077.583279	1954.62727	694.8014656	1.579745325	NaN	NaN	NaN	NaN	NaN	8.5, S
'25-Oct-2022 08:00:00'	31.58333333	1	19.40833333	NaN	21.19687139	29.3932525	91.96162717	7.799957202	2077.575044	1954.599046	694.3773674	1.579740588	NaN	NaN	NaN	NaN	NaN	8.5, S
'25-Oct-2022 09:00:00'	31.625	1	19.58333333	NaN	21.18509723	29.39446648	91.8635375	7.799973868	2077.566809	1954.570823	693.9717341	1.579745946	NaN	NaN	NaN	NaN	NaN	8.5, S
'25-Oct-2022 10:00:00'	31.66666667	1	19.49166667	NaN	21.17276601	29.39564242	92.10917583	7.799990535	2077.558575	1954.5426	693.5504804	1.579744423	NaN	NaN	NaN	NaN	NaN	8.5, S
'25-Oct-2022 11:00:00'	31.70833333	1	19.525	NaN	21.16012173	29.39681226	92.3192935	7.800007202	2077.55034	1954.514377	693.1208245	1.579738864	NaN	NaN	NaN	NaN	NaN	8.5, S
'25-Oct-2022 12:00:00'	31.75	1	19.51666667	NaN	21.14700028	29.39803083	91.81614883	7.800023868	2077.542105	1954.486154	692.6792546	1.579726379	NaN	NaN	NaN	NaN	NaN	8.5, S
'25-Oct-2022 13:00:00'	31.79166667	1	19.50833333	NaN	21.13752549	29.3991605	92.02108867	7.800040535	2077.533871	1954.457931	692.3356157	1.579763647	NaN	NaN	NaN	NaN	NaN	8.5, S
'25-Oct-2022 14:00:00'	31.83333333	1	19.55	NaN	21.12693389	29.40030306	91.905458	7.800253035	2077.525636	1954.429707	691.9619821	1.579785916	NaN	NaN	NaN	NaN	NaN	8.5, S
'25-Oct-2022 15:00:00'	31.875	1	19.43333333	NaN	21.11709471	29.40142284	94.88919667	7.800465535	2077.517401	1954.401484	691.608592	1.579818529	NaN	NaN	NaN	NaN	NaN	8.5, S
'25-Oct-2022 16:00:00'	31.91666667	1	19.53333333	NaN	21.10753146	29.40254607	92.14782383	7.800678035	2077.509167	1954.373261	691.2629221	1.579854801	NaN	NaN	NaN	NaN	2085.41397	8.5, S
'25-Oct-2022 17:00:00'	31.95833333	1	19.525	NaN	21.09763241	29.4036277	91.88422667	7.800890535	2077.500932	1954.345038	690.9075769	1.579887177	NaN	NaN	NaN	NaN	NaN	8.5, S
'25-Oct-2022 18:00:00'	32	1	19.675	NaN	21.08921083	29.40470194	92.31044283	7.801103035	2077.492697	1954.316815	690.5923803	1.579939323	NaN	NaN	NaN	NaN	NaN	8.5, S
'25-Oct-2022 19:00:00'	32.04166667	1	19.85833333	NaN	21.0792893	29.40576254	92.43385367	7.801315535	2077.484463	1954.288592	690.2363786	1.579971735	NaN	NaN	NaN	NaN	NaN	8.5, S
'25-Oct-2022 20:00:00'	32.08333333	1	19.54545455	NaN	21.07029306	29.40683167	92.25903983	7.801528035	2077.476228	1954.260368	689.9057876	1.580016363	NaN	NaN	NaN	NaN	NaN	8.5, S
'25-Oct-2022 21:00:00'	32.125	1	19.68333333	NaN	21.06118393	29.40787895	91.7388675	7.801740535	2077.467993	1954.232145	689.5719073	1.580059802	NaN	NaN	NaN	NaN	NaN	8.5, S
'25-Oct-2022 22:00:00'	32.16666667	1	19.46666667	NaN	21.05564298	29.40880562	91.9310585	7.801953035	2077.459759	1954.203922	689.3328235	1.580152214	NaN	NaN	NaN	NaN	NaN	8.5, S
'25-Oct-2022 23:00:00'	32.20833333	1	19.50833333	NaN	21.05447242	29.4096922	92.27319733	7.802165535	2077.451524	1954.175699	689.2115687	1.580303191	NaN	NaN	NaN	NaN	NaN	8.5, S
'26-Oct-2022 00:00:00'	32.25	1	19.47272727	NaN	21.04900778	29.41069694	92.90620417	7.802378035	2077.443289	1954.147476	688.9760113	1.580395616	NaN	NaN	NaN	NaN	NaN	8.5, S
'26-Oct-2022 01:00:00'	32.29166667	1	19.38333333	NaN	21.04457255	29.41167507	91.77997767	7.802590535	2077.435055	1954.119253	688.7679593	1.580502061	NaN	NaN	NaN	NaN	NaN	8.5, S
'26-Oct-2022 02:00:00'	32.33333333	1	19.43333333	NaN	21.03741778	29.41270556	91.84212633	7.802803035	2077.42682	1954.091029	688.4872255	1.580571731	NaN	NaN	NaN	NaN	NaN	8.5, S
'26-Oct-2022 03:00:00'	32.375	1	19.39166667	NaN	21.02921114	29.4137376	91.53787833	7.803015535	2077.418585	1954.062806	688.1781554	1.580627437	NaN	NaN	NaN	NaN	NaN	8.5, S
'26-Oct-2022 04:00:00'	32.41666667	1	19.425	NaN	21.02127155	29.41480028	92.20200467	7.803228035	2077.410351	1954.034583	687.8769612	1.580686312	NaN	NaN	NaN	NaN	NaN	8.5, S
'26-Oct-2022 05:00:00'	32.45833333	1	19.35	NaN	21.01198781	29.4159144	91.2005125	7.803440535	2077.402116	1954.00636	687.5404144	1.580726709	NaN	NaN	NaN	NaN	NaN	8.5, S
'26-Oct-2022 06:00:00'	32.5	1	19.425	NaN	21.00418306	29.41691389	91.53722267	7.803653035	2077.393881	1953.978137	687.2420455	1.580788236	NaN	NaN	NaN	NaN	NaN	8.5, S
'26-Oct-2022 07:00:00'	32.54166667	1	19.34166667	NaN	20.99537239	29.41795606	91.64798683	7.803865535	2077.385647	1953.949913	686.9173409	1.580835891	NaN	NaN	NaN	NaN	NaN	8.5, S
'26-Oct-2022 08:00:00'	32.58333333	1	19.40833333	NaN	20.98787389	29.41895833	91.73894617	7.804078035	2077.377412	1953.92169	686.6275426	1.580901483	NaN	NaN	NaN	NaN	NaN	8.5, S
'26-Oct-2022 09:00:00'	32.625	1	19.33333333	NaN	20.97897036	29.41997507	91.81240517	7.804290535	2077.369177	1953.893467	686.3001645	1.580948285	NaN	NaN	NaN	NaN	NaN	8.5, S
'26-Oct-2022 10:00:00'	32.66666667	1	19.45833333	NaN	20.97140337	29.42106348	91.707754	7.804503035	2077.360943	1953.865244	686.0102258	1.581011893	NaN	NaN	NaN	NaN	NaN	8.5, S
'26-Oct-2022 11:00:00'	32.70833333	1	19.325	NaN	20.96217883	29.4221493	91.19280217	7.804715535	2077.352708	1953.837021	685.6756328	1.581053595	NaN	NaN	NaN	NaN	NaN	8.5, S
'26-Oct-2022 12:00:00'	32.75	1	19.425	NaN	20.95461278	29.42317917	91.133586	7.804928035	2077.344473	1953.808798	685.3849678	1.581118016	NaN	NaN	NaN	NaN	NaN	8.5, S
'26-Oct-2022 13:00:00'	32.79166667	1	19.79166667	NaN	20.94605294	29.42422857	91.38693033	7.805140535	2077.336238	1953.780574	685.0679561	1.581169043	NaN	NaN	NaN	NaN	NaN	8.5, S
'26-Oct-2022 14:00:00'	32.83333333	1	19.45833333	NaN	20.94021028	29.42519972	91.28129917	7.805382202	2077.328004	1953.752351	684.8229808	1.581257078	NaN	NaN	NaN	NaN	NaN	8.5, S
'26-Oct-2022 15:00:00'	32.875	1	19.45833333	NaN	20.93240195	29.42623621	91.26955067	7.805623868	2077.319769	1953.724128	684.5262381	1.581318259	NaN	NaN	NaN	NaN	NaN	8.5, S
'26-Oct-2022 16:00:00'	32.91666667	1	19.40833333	NaN	20.92578986	29.42721239	91.2672305	7.805865535	2077.311534	1953.695905	684.2608087	1.581396071	NaN	NaN	NaN	NaN	NaN	8.5, S
'26-Oct-2022 17:00:00'	32.95833333	1	19.40833333	NaN	20.92556011	29.42800443	91.16936167	7.806107202	2077.3033	1953.667682	684.1642081	1.581560737	NaN	NaN	NaN	NaN	NaN	8.5, S
'26-Oct-2022 18:00:00'	33	1	19.36666667	NaN	20.92159667	29.42895361	91.1388485	7.806348868	2077.295065	1953.639459	683.9697657	1.581673958	NaN	NaN	NaN	NaN	NaN	8.5, S
'26-Oct-2022 19:00:00'	33.04166667	1	19.38333333	NaN	20.91561211	29.42998225	91.27735717	7.806590535	2077.28683	1953.611235	683.7223285	1.581759411	NaN	NaN	NaN	NaN	NaN	8.5, S
'26-Oct-2022 20:00:00'	33.08333333	1	19.41818182	NaN	20.90813528	29.43102556	91.03663117	7.806832202	2077.278596	1953.583012	683.4350746	1.581824945	NaN	NaN	NaN	NaN	NaN	8.5, S
'26-Oct-2022 21:00:00'	33.125	1	19.30833333	NaN	20.90164349	29.4320867	91.277376	7.807073868	2077.270361	1953.554789	683.17473	1.581903293	NaN	NaN	NaN	NaN	NaN	8.5, S
'26-Oct-2022 22:00:00'	33.16666667	1	19.425	NaN	20.89409719	29.43309719	91.2697455	7.807315535	2077.262126	1953.526566	682.8852674	1.581968367	NaN	NaN	NaN	NaN	NaN	8.5, S
'26-Oct-2022 23:00:00'	33.20833333	1	19.39166667	NaN	20.88771114	29.43410306	91.48890383	7.807557202	2077.253892	1953.498343	682.6270252	1.582048858	NaN	NaN	NaN	NaN	NaN	8.5, S
'27-Oct-2022 00:00:00'	33.25	1	19.16666667	NaN	20.88171	29.43510417	91.14857767	7.807798868	2077.245657	1953.47012	682.3791371	1.58213451	NaN	NaN	NaN	NaN	NaN	8.5, S
'27-Oct-2022 01:00:00'	33.29166667	1	19.10833333	NaN	20.87549803	29.43610309	90.98066567	7.808040535	2077.237422	1953.441896	682.1256352	1.582217416	NaN	NaN	NaN	NaN	NaN	8.5, S
'27-Oct-2022 02:00:00'	33.33333333	1	19.675	NaN	20.8692975	29.43706722	90.83732517	7.808282202	2077.229188	1953.413673	681.8719408	1.582300936	NaN	NaN	NaN	NaN	NaN	8.5, S
'27-Oct-2022 03:00:00'	33.375	1	19.95833333	NaN	20.86481699	29.43810474	92.01222067	7.808523868	2077.220953	1953.38545	681.6657517	1.582406239	NaN	NaN	NaN	NaN	NaN	8.5, S
'27-Oct-2022 04:00:00'	33.41666667	1	20.79090909	NaN	20.85329719	29.43928483	91.016195	7.808765535	2077.212718	1953.357227	681.2731395	1.582416713	NaN	NaN	NaN	NaN	NaN	8.5, S
'27-Oct-2022 05:00:00'	33.45833333	1	21.05	NaN	20.8403349	29.44047119	90.90889167	7.809007202	2077.204484	1953.329004	680.8421515	1.582408107	NaN	NaN	NaN	NaN	NaN	8.5, S
'27-Oct-2022 06:00:00'	33.5	1	21.16666667	NaN	20.83343694	29.4415225	90.94918767	7.809248868	2077.196249	1953.300781	680.5716803	1.582481357	NaN	NaN	NaN	NaN	NaN	8.5, S
'27-Oct-2022 07:00:00'	33.54166667	1	21.28181818	NaN	20.83141521	29.44251803	91.38293	7.809490535	2077.188014	1953.272557	680.4310558	1.582619706	NaN	NaN	NaN	NaN	NaN	8.5, S
'27-Oct-2022 08:00:00'	33.58333333	1	21.3	NaN	20.84182444	29.44319	91.04235333	7.809732202	2077.17978	1953.244334	680.6181898	1.582926374	NaN	NaN	NaN	NaN	NaN	8.5, S
'27-Oct-2022 09:00:00'	33.625	1	21.4	NaN	20.85417972	29.44393694	90.82601417	7.809973868	2077.171545	1953.216111	680.8588202	1.583257837	NaN	NaN	NaN	NaN	NaN	8.5, S
'27-Oct-2022 10:00:00'	33.66666667	1	21.4	NaN	20.86725337	29.44471629	90.77848733	7.810215535	2077.16331	1953.187888	681.1193391	1.583598456	NaN	NaN	NaN	NaN	NaN	8.5, S
'27-Oct-2022 11:00:00'	33.70833333	1	21.49166667	NaN	20.88091922	29.44553649	91.20130183	7.810457202	2077.155076	1953.159665	681.3965222	1.583946466	NaN	NaN	NaN	NaN	NaN	8.5, S
'27-Oct-2022 12:00:00'	33.75	1	21.25	NaN	20.89460889	29.44632861	90.98263567	7.810698868	2077.146841	1953.131441	681.6739615	1.584295255	NaN	NaN	NaN	NaN	NaN	8.5, S
'27-Oct-2022 13:00:00'	33.79166667	1	20.91666667	NaN	20.90857697	29.44710253	91.124108	7.810940535	2077.138606	1953.103218	681.9586606	1.584648064	NaN	NaN	NaN	NaN	NaN	8.5, S
'27-Oct-2022 14:00:00'	33.83333333	1	20.9	NaN	20.92201136	29.44795235	91.47489217	7.810922202	2077.130372	1953.074995	682.2304086	1.584992921	NaN	NaN	NaN	NaN	NaN	8.5, S
'27-Oct-2022 15:00:00'	33.875	1	20.86666667	NaN	20.93490529	29.44901281	91.59879717	7.810903868	2077.122137	1953.046772	682.4912958	1.585327966	NaN	NaN	NaN	NaN	NaN	8.5, S
'27-Oct-2022 16:00:00'	33.91666667	1	20.75	NaN	20.94484944	29.45014129	91.718235	7.810885535	2077.113902	1953.018549	682.6741426	1.585623111	NaN	NaN	NaN	NaN	NaN	8.5, S
'27-Oct-2022 17:00:00'	33.95833333	1	20.5	NaN	20.94674257	29.45154356	91.16534433	7.810867202	2077.105668	1952.990326	682.6452952	1.585808008	NaN	NaN	NaN	NaN	NaN	8.5, S
'27-Oct-2022 18:00:00'	34	1	20.90833333	NaN	20.94653454	29.45285515	91.24390733	7.810848868	2077.097433	1952.962102	682.5584577	1.585966237	NaN	NaN	NaN	NaN	NaN	8.5, S
'27-Oct-2022 19:00:00'	34.04166667	1	21.28333333	NaN	20.94513278	29.45429139	91.29157067	7.810830535	2077.089198	1952.933879	682.4416798	1.586107016	NaN	NaN	NaN	NaN	NaN	8.5, S
'27-Oct-2022 20:00:00'	34.08333333	1	21.39166667	NaN	20.94305321	29.45543945	91.55068533	7.810812202	2077.080964	1952.905656	682.301835	1.586242569	NaN	NaN	NaN	NaN	NaN	8.5, S
'27-Oct-2022 21:00:00'	34.125	1	21.4	NaN	20.94558846	29.45675514	91.45833817	7.810793868	2077.072729	1952.877433	682.2888077	1.586437106	NaN	NaN	NaN	NaN	NaN	8.5, S
'27-Oct-2022 22:00:00'	34.16666667	1	21.45	NaN	20.94812371	29.45807082	91.35941583	7.810775535	2077.064494	1952.84921	682.2757864	1.586631647	NaN	NaN	NaN	NaN	NaN	8.5, S
'27-Oct-2022 23:00:00'	34.20833333	1	21.475	NaN	20.95065896	29.45938651	91.59051333	7.810757202	2077.05626	1952.820987	682.2627713	1.586826192	NaN	NaN	NaN	NaN	NaN	8.5, S
'28-Oct-2022 00:00:00'	34.25	1	21.5	NaN	20.95319421	29.46070219	91.70442283	7.810738868	2077.048025	1952.792763	682.2497622	1.587020742	NaN	NaN	NaN	NaN	NaN	8.5, S
'28-Oct-2022 01:00:00'	34.29166667	1	21.44166667	NaN	20.95572946	29.46201788	91.41403167	7.810720535	2077.03979	1952.76454	682.2367592	1.587215296	NaN	NaN	NaN	NaN	NaN	8.5, S
'28-Oct-2022 02:00:00'	34.33333333	1	21.31666667	NaN	20.95826471	29.46333357	91.75138883	7.810702202	2077.031556	1952.736317	682.2237623	1.587409855	NaN	NaN	NaN	NaN	NaN	8.5, S
'28-Oct-2022 03:00:00'	34.375	1	21.275	NaN	20.96079996	29.46464925	91.485036	7.810683868	2077.023321	1952.708094	682.2107714	1.587604418	NaN	NaN	NaN	NaN	NaN	8.5, S
'28-Oct-2022 04:00:00'	34.41666667	1	21.24166667	NaN	20.96333521	29.46596494	91.61556233	7.810665535	2077.015086	1952.679871	682.1977867	1.587798986	NaN	NaN	NaN	NaN	NaN	8.5, S
'28-Oct-2022 05:00:00'	34.45833333	1	21.25	NaN	20.96587046	29.46728062	91.52023367	7.810647202	2077.006852	1952.651648	682.184808	1.587993557	NaN	NaN	NaN	NaN	NaN	8.5, S
'28-Oct-2022 06:00:00'	34.5	1	21.15833333	NaN	20.96840572	29.46859631	91.50476217	7.810628868	2076.998617	1952.623424	682.1718354	1.588188134	NaN	NaN	NaN	NaN	NaN	8.5, S
'28-Oct-2022 07:00:00'	34.54166667	1	21.11666667	NaN	20.97094097	29.469912	91.56405817	7.810610535	2076.990382	1952.595201	682.1588688	1.588382714	NaN	NaN	NaN	NaN	NaN	8.5, S
'28-Oct-2022 08:00:00'	34.58333333	1	21.08333333	NaN	20.97347622	29.47122768	91.809356	7.810592202	2076.982148	1952.566978	682.1459084	1.588577299	NaN	NaN	NaN	NaN	NaN	8.5, S
'28-Oct-2022 09:00:00'	34.625	1	21.08333333	NaN	20.97601147	29.47254337	92.30614367	7.810573868	2076.973913	1952.538755	682.132954	1.588771889	NaN	NaN	NaN	NaN	NaN	8.5, S
'28-Oct-2022 10:00:00'	34.66666667	1	21.2	NaN	20.97854672	29.47385905	91.96121	7.810555535	2076.965678	1952.510532	682.1200056	1.588966482	NaN	NaN	NaN	NaN	NaN	8.5, S
'28-Oct-2022 11:00:00'	34.70833333	1	21.23333333	NaN	20.98108197	29.47517474	92.215298	7.810537202	2076.957444	1952.482309	682.1070634	1.589161081	NaN	NaN	NaN	NaN	NaN	8.5, S
'28-Oct-2022 12:00:00'	34.75	1	21.35	NaN	20.98361722	29.47649042	92.3954405	7.810518868	2076.949209	1952.454085	682.0941272	1.589355683	NaN	NaN	NaN	NaN	NaN	8.5, S
'28-Oct-2022 13:00:00'	34.79166667	1	21.4	NaN	20.98615247	29.47780611	92.13814083	7.810500535	2076.940974	1952.425862	682.0811971	1.58955029	NaN	NaN	NaN	NaN	NaN	8.5, S
'28-Oct-2022 14:00:00'	34.83333333	1	21.4	NaN	20.98868772	29.4791218	92.1611735	7.810482202	2076.93274	1952.397639	682.068273	1.589744901	NaN	NaN	NaN	NaN	NaN	8.5, S
'28-Oct-2022 15:00:00'	34.875	1	21.4	NaN	20.99122297	29.48043748	92.30761217	7.810463868	2076.924505	1952.369416	682.055355	1.589939517	NaN	NaN	NaN	NaN	NaN	8.5, S
'28-Oct-2022 16:00:00'	34.91666667	1	21.4	NaN	20.99375822	29.48175317	92.10303617	7.810445535	2076.91627	1952.341193	682.042443	1.590134137	NaN	NaN	NaN	NaN	NaN	8.5, S
'28-Oct-2022 17:00:00'	34.95833333	1	21.4	NaN	20.99629347	29.48306885	92.5278295	7.810427202	2076.908036	1952.312969	682.0295372	1.590328762	NaN	NaN	NaN	NaN	NaN	8.5, S
'28-Oct-2022 18:00:00'	35	1	21.41666667	NaN	20.99882872	29.48438454	92.32460183	7.810408868	2076.899801	1952.284746	682.0166373	1.59052339	NaN	NaN	NaN	NaN	NaN	8.5, S
'28-Oct-2022 19:00:00'	35.04166667	1	21.40833333	NaN	21.00136397	29.48570023	92.786294	7.810390535	2076.891566	1952.256523	682.0037436	1.590718024	NaN	NaN	NaN	NaN	NaN	8.5, S
'28-Oct-2022 20:00:00'	35.08333333	1	21.4	NaN	21.00389922	29.48701591	92.923164	7.810372202	2076.883332	1952.2283	681.9908559	1.590912661	NaN	NaN	NaN	NaN	NaN	8.5, S
'28-Oct-2022 21:00:00'	35.125	1	21.39166667	NaN	21.00643447	29.4883316	93.68806033	7.810353868	2076.875097	1952.200077	681.9779742	1.591107303	NaN	NaN	NaN	NaN	NaN	8.5, S
'28-Oct-2022 22:00:00'	35.16666667	1	21.35	NaN	21.00896972	29.48964728	92.51303	7.810335535	2076.866862	1952.171854	681.9650986	1.591301949	NaN	NaN	NaN	NaN	NaN	8.5, S
'28-Oct-2022 23:00:00'	35.20833333	1	21.36666667	NaN	21.01150497	29.49096297	92.99954483	7.810317202	2076.858628	1952.14363	681.9522291	1.5914966	NaN	NaN	NaN	NaN	NaN	8.5, S
'29-Oct-2022 00:00:00'	35.25	1	21.34166667	NaN	21.01404022	29.49227866	92.68662033	7.810298868	2076.850393	1952.115407	681.9393656	1.591691255	NaN	NaN	NaN	NaN	NaN	8.5, S
'29-Oct-2022 01:00:00'	35.29166667	1	21.3	NaN	21.01657547	29.49359434	92.25032283	7.810280535	2076.842158	1952.087184	681.9265082	1.591885914	NaN	NaN	NaN	NaN	NaN	8.5, S
'29-Oct-2022 02:00:00'	35.33333333	1	21.31666667	NaN	21.01911072	29.49491003	92.28563267	7.810262202	2076.833924	1952.058961	681.9136568	1.592080578	NaN	NaN	NaN	NaN	NaN	8.5, S
'29-Oct-2022 03:00:00'	35.375	1	21.325	NaN	21.02164597	29.49622571	92.74723083	7.810243868	2076.825689	1952.030738	681.9008114	1.592275246	NaN	NaN	NaN	NaN	NaN	8.5, S
'29-Oct-2022 04:00:00'	35.41666667	1	21.25833333	NaN	21.02418123	29.4975414	92.46546467	7.810225535	2076.817454	1952.002515	681.8879721	1.592469919	NaN	NaN	NaN	NaN	NaN	8.5, S
'29-Oct-2022 05:00:00'	35.45833333	1	21.23333333	NaN	21.02671648	29.49885709	92.63983983	7.810207202	2076.809219	1951.974291	681.8751389	1.592664595	NaN	NaN	NaN	NaN	NaN	8.5, S
'29-Oct-2022 06:00:00'	35.5	1	21.13636364	NaN	21.02925173	29.50017277	92.3328855	7.810188868	2076.800985	1951.946068	681.8623117	1.592859276	NaN	NaN	NaN	NaN	NaN	8.5, S
'29-Oct-2022 07:00:00'	35.54166667	1	21.13333333	NaN	21.03178698	29.50148846	92.4786195	7.810170535	2076.79275	1951.917845	681.8494905	1.593053962	NaN	NaN	NaN	NaN	NaN	8.5, S
'29-Oct-2022 08:00:00'	35.58333333	1	21.12727273	NaN	21.03432223	29.50280414	92.911118	7.810152202	2076.784515	1951.889622	681.8366754	1.593248652	NaN	NaN	NaN	NaN	NaN	8.5, S
'29-Oct-2022 09:00:00'	35.625	1	21.21666667	NaN	21.03685748	29.50411983	92.45557667	7.810133868	2076.776281	1951.861399	681.8238663	1.593443346	NaN	NaN	NaN	NaN	NaN	8.5, S
'29-Oct-2022 10:00:00'	35.66666667	1	21.175	NaN	21.03939273	29.50543552	93.09486	7.810115535	2076.768046	1951.833176	681.8110633	1.593638044	NaN	NaN	NaN	NaN	NaN	8.5, S
'29-Oct-2022 11:00:00'	35.70833333	1	21.325	NaN	21.04192798	29.5067512	92.57161067	7.810097202	2076.759811	1951.804952	681.7982663	1.593832747	NaN	NaN	NaN	NaN	NaN	8.5, S
'29-Oct-2022 12:00:00'	35.75	1	21.43333333	NaN	21.04446323	29.50806689	92.73904483	7.810078868	2076.751577	1951.776729	681.7854754	1.594027454	NaN	NaN	NaN	NaN	NaN	8.5, S
'29-Oct-2022 13:00:00'	35.79166667	1	21.5	NaN	21.04699848	29.50938257	92.79168717	7.810060535	2076.743342	1951.748506	681.7726904	1.594222166	NaN	NaN	NaN	NaN	NaN	8.5, S
'29-Oct-2022 14:00:00'	35.83333333	1	21.5	NaN	21.04953373	29.51069826	93.02031683	7.810042202	2076.735107	1951.720283	681.7599116	1.594416882	NaN	NaN	NaN	NaN	NaN	8.5, S
'29-Oct-2022 15:00:00'	35.875	1	21.59166667	NaN	21.05206898	29.51201395	93.13851017	7.810023868	2076.726873	1951.69206	681.7471387	1.594611602	NaN	NaN	NaN	NaN	NaN	8.5, S
'29-Oct-2022 16:00:00'	35.91666667	1	21.5	NaN	21.05460423	29.51332963	93.092141	7.810005535	2076.718638	1951.663837	681.7343719	1.594806326	NaN	NaN	NaN	NaN	NaN	8.5, S
'29-Oct-2022 17:00:00'	35.95833333	1	21.5	NaN	21.05713948	29.51464532	93.21588467	7.809987202	2076.710403	1951.635613	681.7216111	1.595001055	NaN	NaN	NaN	NaN	NaN	8.5, S
'29-Oct-2022 18:00:00'	36	1	21.5	NaN	21.05967473	29.515961	92.92763317	7.809968868	2076.702169	1951.60739	681.7088563	1.595195788	NaN	NaN	NaN	NaN	NaN	8.5, S
'29-Oct-2022 19:00:00'	36.04166667	1	21.43333333	NaN	21.06220998	29.51727669	92.62847367	7.809950535	2076.693934	1951.579167	681.6961076	1.595390526	NaN	NaN	NaN	NaN	NaN	8.5, S
'29-Oct-2022 20:00:00'	36.08333333	1	21.35833333	NaN	21.06474523	29.51859238	92.8876935	7.809932202	2076.685699	1951.550944	681.6833649	1.595585267	NaN	NaN	NaN	NaN	NaN	8.5, S
'29-Oct-2022 21:00:00'	36.125	1	21.41666667	NaN	21.06728048	29.51990806	92.8339895	7.809913868	2076.677465	1951.522721	681.6706282	1.595780013	NaN	NaN	NaN	NaN	NaN	8.5, S
'29-Oct-2022 22:00:00'	36.16666667	1	21.425	NaN	21.06981573	29.52122375	92.98370867	7.809895535	2076.66923	1951.494497	681.6578976	1.595974764	NaN	NaN	NaN	NaN	NaN	8.5, S
'29-Oct-2022 23:00:00'	36.20833333	1	21.325	NaN	21.07235098	29.52253943	92.65516833	7.809877202	2076.660995	1951.466274	681.645173	1.596169519	NaN	NaN	NaN	NaN	NaN	8.5, S
'30-Oct-2022 00:00:00'	36.25	1	21.38333333	NaN	21.07488623	29.52385512	92.8221675	7.809858868	2076.652761	1951.438051	681.6324544	1.596364278	NaN	NaN	NaN	NaN	NaN	8.5, S
'30-Oct-2022 01:00:00'	36.29166667	1	21.26363636	NaN	21.07742148	29.52517081	93.19660567	7.809840535	2076.644526	1951.409828	681.6197418	1.596559041	NaN	NaN	NaN	NaN	NaN	8.5, S
'30-Oct-2022 02:00:00'	36.33333333	1	21.29166667	NaN	21.07995673	29.52648649	93.32506667	7.809822202	2076.636291	1951.381605	681.6070353	1.596753809	NaN	NaN	NaN	NaN	NaN	8.5, S
'30-Oct-2022 03:00:00'	36.375	1	21.3	NaN	21.08249199	29.52780218	92.774706	7.809803868	2076.628057	1951.353382	681.5943347	1.596948581	NaN	NaN	NaN	NaN	NaN	8.5, S
'30-Oct-2022 04:00:00'	36.41666667	1	21.26666667	NaN	21.08502724	29.52911786	92.99173983	7.809785535	2076.619822	1951.325158	681.5816402	1.597143357	NaN	NaN	NaN	NaN	NaN	8.5, S
'30-Oct-2022 05:00:00'	36.45833333	1	21.15833333	NaN	21.08756249	29.53043355	92.77526017	7.809767202	2076.611587	1951.296935	681.5689517	1.597338137	NaN	NaN	NaN	NaN	NaN	8.5, S
'30-Oct-2022 06:00:00'	36.5	1	21.18333333	NaN	21.09009774	29.53174924	93.03212333	7.809748868	2076.603353	1951.268712	681.5562692	1.597532922	NaN	NaN	NaN	NaN	NaN	8.5, S
'30-Oct-2022 07:00:00'	36.54166667	1	21.14166667	NaN	21.09263299	29.53306492	92.97730183	7.809730535	2076.595118	1951.240489	681.5435927	1.597727711	NaN	NaN	NaN	NaN	NaN	8.5, S
'30-Oct-2022 08:00:00'	36.58333333	1	21.19166667	NaN	21.09516824	29.53438061	92.83961917	7.809712202	2076.586883	1951.212266	681.5309223	1.597922505	NaN	NaN	NaN	NaN	NaN	8.5, S
'30-Oct-2022 09:00:00'	36.625	1	21.16666667	NaN	21.09770349	29.53569629	92.81382267	7.809693868	2076.578649	1951.184043	681.5182578	1.598117303	NaN	NaN	NaN	NaN	NaN	8.5, S
'30-Oct-2022 10:00:00'	36.66666667	1	21.20833333	NaN	21.10023874	29.53701198	92.79717317	7.809675535	2076.570414	1951.155819	681.5055994	1.598312105	NaN	NaN	NaN	NaN	NaN	8.5, S
'30-Oct-2022 11:00:00'	36.70833333	1	21.40833333	NaN	21.10277399	29.53832767	92.8702615	7.809657202	2076.562179	1951.127596	681.492947	1.598506911	NaN	NaN	NaN	NaN	NaN	8.5, S
'30-Oct-2022 12:00:00'	36.75	1	21.50833333	NaN	21.10530924	29.53964335	92.8474265	7.809638868	2076.553945	1951.099373	681.4803006	1.598701722	NaN	NaN	NaN	NaN	NaN	8.5, S
'30-Oct-2022 13:00:00'	36.79166667	1	21.6	NaN	21.10784449	29.54095904	92.88937483	7.809620535	2076.54571	1951.07115	681.4676602	1.598896536	NaN	NaN	NaN	NaN	NaN	8.5, S
'30-Oct-2022 14:00:00'	36.83333333	1	21.6	NaN	21.11037974	29.54227472	92.92790067	7.809602202	2076.537475	1951.042927	681.4550258	1.599091356	NaN	NaN	NaN	NaN	NaN	8.5, S
'30-Oct-2022 15:00:00'	36.875	1	21.6	NaN	21.11291499	29.54359041	92.870728	7.809583868	2076.529241	1951.014704	681.4423974	1.599286179	NaN	NaN	NaN	NaN	NaN	8.5, S
'30-Oct-2022 16:00:00'	36.91666667	1	21.6	NaN	21.11545024	29.54490609	92.78562	7.809565535	2076.521006	1950.98648	681.429775	1.599481007	NaN	NaN	NaN	NaN	NaN	8.5, S
'30-Oct-2022 17:00:00'	36.95833333	1	21.525	NaN	21.11798549	29.54622178	93.78432067	7.809547202	2076.512771	1950.958257	681.4171586	1.599675839	NaN	NaN	NaN	NaN	NaN	8.5, S
'30-Oct-2022 18:00:00'	37	1	21.53333333	NaN	21.12052074	29.54753747	93.09713183	7.809528868	2076.504537	1950.930034	681.4045482	1.599870675	NaN	NaN	NaN	NaN	NaN	8.5, S
'30-Oct-2022 19:00:00'	37.04166667	1	21.53333333	NaN	21.12305599	29.54885315	93.27858017	7.809510535	2076.496302	1950.901811	681.3919438	1.600065516	NaN	NaN	NaN	NaN	NaN	8.5, S
'30-Oct-2022 20:00:00'	37.08333333	1	21.53333333	NaN	21.12559124	29.55016884	93.04062683	7.809492202	2076.488067	1950.873588	681.3793455	1.600260361	NaN	NaN	NaN	NaN	NaN	8.5, S
'30-Oct-2022 21:00:00'	37.125	1	21.50833333	NaN	21.12812649	29.55148452	92.993787	7.809473868	2076.479833	1950.845365	681.3667531	1.60045521	NaN	NaN	NaN	NaN	NaN	8.5, S
'30-Oct-2022 22:00:00'	37.16666667	1	21.525	NaN	21.13066174	29.55280021	93.32117533	7.809455535	2076.471598	1950.817141	681.3541667	1.600650063	NaN	NaN	NaN	NaN	NaN	8.5, S
'30-Oct-2022 23:00:00'	37.20833333	1	21.5	NaN	21.13319699	29.5541159	93.20133883	7.809437202	2076.463363	1950.788918	681.3415863	1.600844921	NaN	NaN	NaN	NaN	NaN	8.5, S
'31-Oct-2022 00:00:00'	37.25	1	21.53333333	NaN	21.13573224	29.55543158	93.2039765	7.809418868	2076.455129	1950.760695	681.3290119	1.601039783	NaN	NaN	NaN	NaN	NaN	8.5, S
'31-Oct-2022 01:00:00'	37.29166667	1	21.54166667	NaN	21.13826749	29.55674727	93.009425	7.809400535	2076.446894	1950.732472	681.3164435	1.601234649	NaN	NaN	NaN	NaN	NaN	8.5, S
'31-Oct-2022 02:00:00'	37.33333333	1	21.55833333	NaN	21.14080275	29.55806295	92.87031917	7.809382202	2076.438659	1950.704249	681.3038811	1.60142952	NaN	NaN	NaN	NaN	NaN	8.5, S
'31-Oct-2022 03:00:00'	37.375	1	21.54166667	NaN	21.143338	29.55937864	92.92912017	7.809363868	2076.430425	1950.676025	681.2913247	1.601624394	NaN	NaN	NaN	NaN	NaN	8.5, S
'31-Oct-2022 04:00:00'	37.41666667	1	21.56666667	NaN	21.14587325	29.56069433	92.86044467	7.809345535	2076.42219	1950.647802	681.2787742	1.601819273	NaN	NaN	NaN	NaN	NaN	8.5, S
'31-Oct-2022 05:00:00'	37.45833333	1	21.56666667	NaN	21.1484085	29.56201001	93.0596795	7.809327202	2076.413955	1950.619579	681.2662298	1.602014156	NaN	NaN	NaN	NaN	NaN	8.5, S
'31-Oct-2022 06:00:00'	37.5	1	21.5	NaN	21.15094375	29.5633257	92.78970517	7.809308868	2076.405721	1950.591356	681.2536913	1.602209044	NaN	NaN	NaN	NaN	NaN	8.5, S
'31-Oct-2022 07:00:00'	37.54166667	1	21.5	NaN	21.153479	29.56464138	92.597308	7.809290535	2076.397486	1950.563133	681.2411588	1.602403936	NaN	NaN	NaN	NaN	NaN	8.5, S
'31-Oct-2022 08:00:00'	37.58333333	1	21.5	NaN	21.15601425	29.56595707	92.70259917	7.809272202	2076.389251	1950.53491	681.2286324	1.602598832	NaN	NaN	NaN	NaN	NaN	8.5, S
'31-Oct-2022 09:00:00'	37.625	1	21.525	NaN	21.1585495	29.56727276	92.78413267	7.809253868	2076.381017	1950.506686	681.2161119	1.602793732	NaN	NaN	NaN	NaN	NaN	8.5, S
'31-Oct-2022 10:00:00'	37.66666667	1	21.64285714	NaN	21.16108475	29.56858844	92.5807035	7.809235535	2076.372782	1950.478463	681.2035973	1.602988636	NaN	NaN	NaN	NaN	NaN	8.5, S
'31-Oct-2022 11:00:00'	37.70833333	1	21.69166667	NaN	21.16362	29.56990413	93.110627	7.809217202	2076.364547	1950.45024	681.1910888	1.603183545	NaN	NaN	NaN	NaN	NaN	8.5, S
'31-Oct-2022 12:00:00'	37.75	1	21.7	NaN	21.16615525	29.57121981	92.79893867	7.809198868	2076.356313	1950.422017	681.1785862	1.603378458	NaN	NaN	NaN	NaN	NaN	8.5, S
'31-Oct-2022 13:00:00'	37.79166667	1	21.375	NaN	21.1686905	29.5725355	NaN	7.809180535	2076.348078	1950.393794	681.1660897	1.603573375	NaN	NaN	NaN	NaN	NaN	8.5, S
'31-Oct-2022 14:00:00'	37.83333333	1	20.65833333	NaN	21.15929833	29.57423472	NaN	7.809162202	2076.339843	1950.365571	680.8405541	1.603603464	NaN	NaN	2076.339843	1950.365571	NaN	8.5, S
'31-Oct-2022 15:00:00'	37.875	1	21.20833333	NaN	21.16720694	29.57546583	NaN	7.809143868	2076.238927	1950.337059	681.3766696	1.602988847	NaN	NaN	NaN	NaN	2079.295624	8.5, S
'31-Oct-2022 16:00:00'	37.91666667	1	21.48333333	NaN	21.18066096	29.57638624	NaN	7.809125535	2076.13801	1950.308548	682.0567381	1.602452706	NaN	NaN	NaN	NaN	NaN	8.5, S
'31-Oct-2022 17:00:00'	37.95833333	1	21.59166667	NaN	21.19158222	29.57735361	NaN	7.809107202	2076.037093	1950.280036	682.6702944	1.601882117	NaN	NaN	NaN	NaN	NaN	8.5, S
'31-Oct-2022 18:00:00'	38	1	21.675	NaN	21.19077972	29.57862583	NaN	7.809088868	2075.936176	1950.251525	682.9746624	1.601150578	NaN	NaN	NaN	NaN	NaN	8.5, S
'31-Oct-2022 19:00:00'	38.04166667	1	21.7	NaN	21.19610309	29.57966264	NaN	7.809070535	2075.83526	1950.223013	683.439863	1.600504288	NaN	NaN	NaN	NaN	NaN	8.5, S
'31-Oct-2022 20:00:00'	38.08333333	1	21.74166667	NaN	21.20518222	29.58059556	NaN	7.809052202	2075.734343	1950.194502	684.0046777	1.599909741	NaN	NaN	NaN	NaN	NaN	8.5, S
'31-Oct-2022 21:00:00'	38.125	1	21.75	NaN	21.21738222	29.58149417	NaN	7.809033868	2075.633426	1950.165991	684.6534161	1.599357512	NaN	NaN	NaN	NaN	NaN	8.5, S
'31-Oct-2022 22:00:00'	38.16666667	1	21.8	NaN	21.23036264	29.5823486	NaN	7.809015535	2075.53251	1950.137479	685.3230641	1.59881641	NaN	NaN	NaN	NaN	NaN	8.5, S
'31-Oct-2022 23:00:00'	38.20833333	1	21.8	NaN	21.24295611	29.58324806	NaN	7.808997202	2075.431593	1950.108968	685.9837188	1.598269619	NaN	NaN	NaN	NaN	NaN	8.5, S
'01-Nov-2022 00:00:00'	38.25	1	21.8	NaN	21.25578667	29.58412722	NaN	7.808978868	2075.330676	1950.080456	686.651082	1.597726365	NaN	NaN	NaN	NaN	NaN	8.5, S
'01-Nov-2022 01:00:00'	38.29166667	1	21.8	NaN	21.26986348	29.58492865	NaN	7.808960535	2075.22976	1950.051945	687.3514451	1.59720093	NaN	NaN	NaN	NaN	NaN	8.5, S
'01-Nov-2022 02:00:00'	38.33333333	1	21.8	NaN	21.28549583	29.58568472	NaN	7.808942202	2075.128843	1950.023433	688.0938087	1.596697036	NaN	NaN	NaN	NaN	NaN	8.5, S
'01-Nov-2022 03:00:00'	38.375	1	21.8	NaN	21.30162194	29.58643444	NaN	7.808923868	2075.027926	1949.994922	688.8502244	1.596199951	NaN	NaN	NaN	NaN	NaN	8.5, S
'01-Nov-2022 04:00:00'	38.41666667	1	21.8	NaN	21.31783915	29.58714451	NaN	7.808905535	2074.92701	1949.96641	689.6092546	1.595704721	NaN	NaN	NaN	NaN	NaN	8.5, S
'01-Nov-2022 05:00:00'	38.45833333	1	21.8	NaN	21.33499028	29.58783611	NaN	7.808887202	2074.826093	1949.937899	690.3941183	1.59522237	NaN	NaN	NaN	NaN	NaN	8.5, S
'01-Nov-2022 06:00:00'	38.5	1	21.8	NaN	21.35240861	29.58849556	NaN	7.808868868	2074.725176	1949.909388	691.1865616	1.594744145	NaN	NaN	NaN	NaN	NaN	8.5, S
'01-Nov-2022 07:00:00'	38.54166667	1	21.8	NaN	21.36953596	29.58916208	NaN	7.808850535	2074.624259	1949.880876	691.972115	1.594262039	NaN	NaN	NaN	NaN	NaN	8.5, S
'01-Nov-2022 08:00:00'	38.58333333	1	21.8	NaN	21.38631278	29.58980083	NaN	7.808832202	2074.523343	1949.852365	692.7485392	1.593775713	NaN	NaN	NaN	NaN	NaN	8.5, S
'01-Nov-2022 09:00:00'	38.625	1	21.8	NaN	21.40247549	29.59046295	NaN	7.808813868	2074.422426	1949.823853	693.5095112	1.593280944	NaN	NaN	NaN	NaN	NaN	8.5, S
'01-Nov-2022 10:00:00'	38.66666667	1	21.8	NaN	21.41845253	29.59110169	NaN	7.808795535	2074.321509	1949.795342	694.2658528	1.592784101	NaN	NaN	NaN	NaN	NaN	8.5, S
'01-Nov-2022 11:00:00'	38.70833333	1	21.76363636	NaN	21.43422306	29.5917825	NaN	7.808777202	2074.220593	1949.76683	695.0181087	1.592284033	NaN	NaN	NaN	NaN	NaN	8.5, S
'01-Nov-2022 12:00:00'	38.75	1	20.45833333	NaN	21.44999361	29.59240917	NaN	7.808758868	2074.119676	1949.738319	695.7702444	1.591784788	NaN	NaN	NaN	NaN	NaN	8.5, S
'01-Nov-2022 13:00:00'	38.79166667	1	20.20909091	NaN	21.46596404	29.59304466	NaN	7.808740535	2074.018759	1949.709807	696.5288045	1.591288218	NaN	NaN	NaN	NaN	NaN	8.5, S
'01-Nov-2022 14:00:00'	38.83333333	1	19.88333333	NaN	21.48206111	29.59368333	NaN	7.808765535	2073.917843	1949.681296	697.2917051	1.590793415	NaN	NaN	NaN	NaN	NaN	8.5, S
'01-Nov-2022 15:00:00'	38.875	1	19.88333333	NaN	21.49777056	29.59430944	NaN	7.808790535	2073.816926	1949.652785	698.0446096	1.590293674	NaN	NaN	NaN	NaN	NaN	8.5, S
'01-Nov-2022 16:00:00'	38.91666667	1	19.725	NaN	21.49833961	29.5953132	NaN	7.808815535	2073.716009	1949.624273	698.3901701	1.589585475	NaN	NaN	NaN	NaN	NaN	8.5, S
'01-Nov-2022 17:00:00'	38.95833333	1	19.81666667	NaN	21.48938472	29.59642556	NaN	7.808840535	2073.615093	1949.595762	698.4769901	1.58874798	NaN	NaN	NaN	NaN	NaN	8.5, S
'01-Nov-2022 18:00:00'	39	1	20.60909091	NaN	21.4774175	29.59759778	NaN	7.808865535	2073.514176	1949.56725	698.4824392	1.587869468	NaN	NaN	NaN	NaN	NaN	8.5, S
'01-Nov-2022 19:00:00'	39.04166667	1	21.24166667	NaN	21.46502717	29.59870588	NaN	7.808890535	2073.413259	1949.538739	698.4752752	1.586986392	NaN	NaN	NaN	NaN	NaN	8.5, S
'01-Nov-2022 20:00:00'	39.08333333	1	21.44166667	NaN	21.45088579	29.59983482	NaN	7.808915535	2073.312342	1949.510227	698.4205967	1.58607984	NaN	NaN	NaN	NaN	NaN	8.5, S
'01-Nov-2022 21:00:00'	39.125	1	21.50833333	NaN	21.43820222	29.60088861	NaN	7.808940535	2073.211426	1949.481716	698.404628	1.585194115	NaN	NaN	NaN	NaN	NaN	8.5, S
'01-Nov-2022 22:00:00'	39.16666667	1	21.6	NaN	21.4345736	29.6017441	NaN	7.808965535	2073.110509	1949.453204	698.6333489	1.584432528	NaN	NaN	NaN	NaN	NaN	8.5, S
'01-Nov-2022 23:00:00'	39.20833333	1	21.625	NaN	21.44326194	29.60241917	NaN	7.808990535	2073.009592	1949.424693	699.196719	1.583838385	NaN	NaN	NaN	NaN	NaN	8.5, S
'02-Nov-2022 00:00:00'	39.25	1	21.7	NaN	21.45329194	29.60308417	NaN	7.809015535	2072.908676	1949.396182	699.7972239	1.583262425	NaN	NaN	NaN	NaN	NaN	8.5, S
'02-Nov-2022 01:00:00'	39.29166667	1	21.7	NaN	21.46411489	29.60375084	NaN	7.809040535	2072.807759	1949.36767	700.4200836	1.582697148	NaN	NaN	NaN	NaN	NaN	8.5, S
'02-Nov-2022 02:00:00'	39.33333333	1	21.7	NaN	21.47545417	29.60443833	NaN	7.809065535	2072.706842	1949.339159	701.0580801	1.582138599	NaN	NaN	NaN	NaN	NaN	8.5, S
'02-Nov-2022 03:00:00'	39.375	1	21.7	NaN	21.48701722	29.60513639	NaN	7.809090535	2072.605926	1949.310647	701.7030249	1.581582996	NaN	NaN	NaN	NaN	NaN	8.5, S
'02-Nov-2022 04:00:00'	39.41666667	1	21.7	NaN	21.49897022	29.60582753	NaN	7.809115535	2072.505009	1949.282136	702.3592038	1.581032795	NaN	NaN	NaN	NaN	NaN	8.5, S
'02-Nov-2022 05:00:00'	39.45833333	1	21.7	NaN	21.5099275	29.60656222	NaN	7.809140535	2072.404092	1949.253624	702.9893517	1.580468769	NaN	NaN	NaN	NaN	NaN	8.5, S
'02-Nov-2022 06:00:00'	39.5	1	21.65833333	NaN	21.52067694	29.60731778	NaN	7.809165535	2072.303176	1949.225113	703.6147308	1.57990177	NaN	NaN	NaN	NaN	NaN	8.5, S
'02-Nov-2022 07:00:00'	39.54166667	1	21.6	NaN	21.53055646	29.60808174	NaN	7.809190535	2072.202259	1949.196602	704.2168474	1.579323088	NaN	NaN	NaN	NaN	NaN	8.5, S
'02-Nov-2022 08:00:00'	39.58333333	1	21.6	NaN	21.53824556	29.60902944	NaN	7.809215535	2072.101342	1949.16809	704.7622492	1.57871273	NaN	NaN	NaN	NaN	NaN	8.5, S
'02-Nov-2022 09:00:00'	39.625	1	21.60833333	NaN	21.54383583	29.61003528	NaN	7.809240535	2072.000426	1949.139579	705.2511615	1.57807357	NaN	NaN	NaN	NaN	NaN	8.5, S
'02-Nov-2022 10:00:00'	39.66666667	1	21.70833333	NaN	21.54779888	29.61108403	NaN	7.809265535	2071.899509	1949.111067	705.6962483	1.577412136	NaN	NaN	NaN	NaN	NaN	8.5, S
'02-Nov-2022 11:00:00'	39.70833333	1	21.71818182	NaN	21.55078802	29.61212646	NaN	7.809290535	2071.798592	1949.082556	706.1146425	1.576737832	NaN	NaN	NaN	NaN	NaN	8.5, S
'02-Nov-2022 12:00:00'	39.75	1	21.40833333	NaN	21.55335917	29.61325917	NaN	7.809315535	2071.697675	1949.054044	706.5233668	1.576056852	NaN	NaN	NaN	NaN	NaN	8.5, S
'02-Nov-2022 13:00:00'	39.79166667	1	21.02727273	NaN	21.55560169	29.6143514	NaN	7.809340535	2071.596759	1949.025533	706.9225975	1.575372101	NaN	NaN	NaN	NaN	NaN	8.5, S
'02-Nov-2022 14:00:00'	39.83333333	1	20.19166667	NaN	21.55837	29.61548389	NaN	7.809365535	2071.495842	1948.997021	707.3373919	1.574693971	NaN	NaN	NaN	NaN	NaN	8.5, S
'02-Nov-2022 15:00:00'	39.875	1	20.11666667	NaN	21.56363917	29.61651972	NaN	7.809390535	2071.394925	1948.96851	707.8201114	1.574050682	NaN	NaN	NaN	NaN	NaN	8.5, S
'02-Nov-2022 16:00:00'	39.91666667	1	20.13333333	NaN	21.5646323	29.61773848	NaN	7.809415535	2071.294009	1948.939999	708.1878639	1.573347867	NaN	NaN	NaN	NaN	NaN	8.5, S
'02-Nov-2022 17:00:00'	39.95833333	1	20.725	NaN	21.56113463	29.61908338	NaN	7.809440535	2071.193092	1948.911487	708.4335383	1.572583437	NaN	NaN	NaN	NaN	NaN	8.5, S
'02-Nov-2022 18:00:00'	40	1	21.35833333	NaN	21.54352897	29.62068134	NaN	7.809465535	2071.092175	1948.882976	708.2925173	1.571627234	NaN	NaN	NaN	NaN	NaN	8.5, S
'02-Nov-2022 19:00:00'	40.04166667	1	21.5	NaN	21.52319242	29.6223177	NaN	7.809490535	2070.991259	1948.854464	708.0765528	1.570634454	NaN	NaN	NaN	NaN	NaN	8.5, S
'02-Nov-2022 20:00:00'	40.08333333	1	21.625	NaN	21.50287111	29.62392528	NaN	7.809515535	2070.890342	1948.825953	707.8606323	1.56964271	NaN	NaN	NaN	NaN	NaN	8.5, S
'02-Nov-2022 21:00:00'	40.125	1	21.76666667	NaN	21.49050194	29.62534278	NaN	7.809540535	2070.789425	1948.797441	707.8619056	1.568759907	NaN	NaN	NaN	NaN	NaN	8.5, S
'02-Nov-2022 22:00:00'	40.16666667	1	21.71666667	NaN	21.48720674	29.62662275	NaN	7.809565535	2070.688509	1948.76893	708.1124189	1.568000093	NaN	NaN	NaN	NaN	NaN	8.5, S
'02-Nov-2022 23:00:00'	40.20833333	1	21.75	NaN	21.48564639	29.62798139	NaN	7.809590535	2070.587592	1948.740418	708.4126021	1.567262529	NaN	NaN	NaN	NaN	NaN	8.5, S
'03-Nov-2022 00:00:00'	40.25	1	21.73333333	NaN	21.48554917	29.62926667	NaN	7.809615535	2070.486675	1948.711907	708.7523144	1.566545539	NaN	NaN	NaN	NaN	NaN	8.5, S
'03-Nov-2022 01:00:00'	40.29166667	1	21.71666667	NaN	21.48850704	29.63049268	NaN	7.809640535	2070.385758	1948.683396	709.1760526	1.565870125	NaN	NaN	NaN	NaN	NaN	8.5, S
'03-Nov-2022 02:00:00'	40.33333333	1	21.65833333	NaN	21.49153556	29.63170528	NaN	7.809665535	2070.284842	1948.654884	709.601843	1.565195928	NaN	NaN	NaN	NaN	NaN	8.5, S
'03-Nov-2022 03:00:00'	40.375	1	21.63333333	NaN	21.49585623	29.63287562	NaN	7.809690535	2070.183925	1948.626373	710.0631355	1.564539583	NaN	NaN	NaN	NaN	NaN	8.5, S
'03-Nov-2022 04:00:00'	40.41666667	1	21.675	NaN	21.49949408	29.63404592	NaN	7.809715535	2070.083008	1948.597861	710.5058031	1.563874246	NaN	NaN	NaN	NaN	NaN	8.5, S
'03-Nov-2022 05:00:00'	40.45833333	1	21.675	NaN	21.50303167	29.63517889	NaN	7.809740535	2069.982092	1948.56935	710.9453716	1.563208155	NaN	NaN	NaN	NaN	NaN	8.5, S
'03-Nov-2022 06:00:00'	40.5	1	21.59166667	NaN	21.50685125	29.63633518	NaN	7.809765535	2069.881175	1948.540838	711.3935416	1.562545617	NaN	NaN	NaN	NaN	NaN	8.5, S
'03-Nov-2022 07:00:00'	40.54166667	1	21.625	NaN	21.51071972	29.63745042	NaN	7.809790535	2069.780258	1948.512327	711.8427045	1.561884357	NaN	NaN	NaN	NaN	NaN	8.5, S
'03-Nov-2022 08:00:00'	40.58333333	1	21.55833333	NaN	21.51441444	29.63858389	NaN	7.809815535	2069.679342	1948.483815	712.2876966	1.56122065	NaN	NaN	NaN	NaN	NaN	8.5, S
'03-Nov-2022 09:00:00'	40.625	1	21.60833333	NaN	21.51712611	29.639745	NaN	7.809840535	2069.578425	1948.455304	712.7061067	1.560543611	NaN	NaN	NaN	NaN	NaN	8.5, S
'03-Nov-2022 10:00:00'	40.66666667	1	21.68333333	NaN	21.51885618	29.64092163	NaN	7.809865535	2069.477508	1948.426793	713.0977206	1.559853423	NaN	NaN	NaN	NaN	NaN	8.5, S
'03-Nov-2022 11:00:00'	40.70833333	1	21.75454545	NaN	21.51996222	29.64205833	NaN	7.809890535	2069.376592	1948.398281	713.4715054	1.55915556	NaN	NaN	NaN	NaN	NaN	8.5, S
'03-Nov-2022 12:00:00'	40.75	1	21.43333333	NaN	21.52082389	29.64325611	NaN	7.809915535	2069.275675	1948.36977	713.8398138	1.55845378	NaN	NaN	NaN	NaN	NaN	8.5, S
'03-Nov-2022 13:00:00'	40.79166667	1	20.34166667	NaN	21.5221559	29.64441854	NaN	7.809940535	2069.174758	1948.341258	714.2209108	1.557758818	NaN	NaN	NaN	NaN	NaN	8.5, S
'03-Nov-2022 14:00:00'	40.83333333	1	20.16666667	NaN	21.52593306	29.64546417	NaN	7.809998868	2069.073842	1948.312747	714.668586	1.557097953	NaN	NaN	NaN	NaN	NaN	8.5, S
'03-Nov-2022 15:00:00'	40.875	1	19.96666667	NaN	21.53300222	29.64651444	NaN	7.810057202	2068.972925	1948.284235	715.2087777	1.556480864	NaN	NaN	NaN	NaN	NaN	8.5, S
'03-Nov-2022 16:00:00'	40.91666667	1	20.01666667	NaN	21.53984101	29.64748904	NaN	7.810115535	2068.872008	1948.255724	715.7416501	1.555861772	NaN	NaN	NaN	NaN	NaN	8.5, S
'03-Nov-2022 17:00:00'	40.95833333	1	20.96666667	NaN	21.53266556	29.64878083	NaN	7.810173868	2068.771091	1948.227212	715.8881119	1.555052574	NaN	NaN	NaN	NaN	NaN	8.5, S
'03-Nov-2022 18:00:00'	41	1	21.325	NaN	21.519525	29.65013	NaN	7.810232202	2068.670175	1948.198701	715.8686798	1.554163677	NaN	NaN	NaN	NaN	NaN	8.5, S
'03-Nov-2022 19:00:00'	41.04166667	1	21.49090909	NaN	21.50521433	29.65139494	NaN	7.810290535	2068.569258	1948.17019	715.8150893	1.553260634	NaN	NaN	NaN	NaN	NaN	8.5, S
'03-Nov-2022 20:00:00'	41.08333333	1	21.55	NaN	21.49193139	29.65265361	NaN	7.810348868	2068.468341	1948.141678	715.7902482	1.552371606	NaN	NaN	NaN	NaN	NaN	8.5, S
'03-Nov-2022 21:00:00'	41.125	1	21.575	NaN	21.4889725	29.65365444	NaN	7.810407202	2068.367425	1948.113167	716.0500454	1.551622884	NaN	NaN	NaN	NaN	NaN	8.5, S
'03-Nov-2022 22:00:00'	41.16666667	1	21.56666667	NaN	21.49049101	29.65471545	NaN	7.810465535	2068.266508	1948.084655	716.436534	1.550932832	NaN	NaN	NaN	NaN	NaN	8.5, S
'03-Nov-2022 23:00:00'	41.20833333	1	21.56666667	NaN	21.49123917	29.65587361	NaN	7.810523868	2068.165591	1948.056144	716.8034267	1.550231455	NaN	NaN	NaN	NaN	NaN	8.5, S
'04-Nov-2022 00:00:00'	41.25	1	21.55833333	NaN	21.49222333	29.65702083	NaN	7.810582202	2068.064675	1948.027632	717.1770136	1.549533459	NaN	NaN	NaN	NaN	NaN	8.5, S
'04-Nov-2022 01:00:00'	41.29166667	1	21.55833333	NaN	21.49369438	29.65819354	NaN	7.810640535	2067.963758	1947.999121	717.5649859	1.548841697	NaN	NaN	NaN	NaN	NaN	8.5, S
'04-Nov-2022 02:00:00'	41.33333333	1	21.53333333	NaN	21.49555194	29.65936917	NaN	7.810698868	2067.862841	1947.97061	717.9641482	1.548155125	NaN	NaN	NaN	NaN	NaN	8.5, S
'04-Nov-2022 03:00:00'	41.375	1	21.525	NaN	21.49785139	29.66053417	NaN	7.810757202	2067.761925	1947.942098	718.3758329	1.547474643	NaN	NaN	NaN	NaN	NaN	8.5, S
'04-Nov-2022 04:00:00'	41.41666667	1	21.49166667	NaN	21.50012873	29.66164535	NaN	7.810815535	2067.661008	1947.913587	718.7862571	1.546794659	NaN	NaN	NaN	NaN	NaN	8.5, S
'04-Nov-2022 05:00:00'	41.45833333	1	21.45	NaN	21.50214194	29.66278222	NaN	7.810873868	2067.560091	1947.885075	719.1900191	1.546110964	NaN	NaN	NaN	NaN	NaN	8.5, S
'04-Nov-2022 06:00:00'	41.5	1	21.45	NaN	21.50334194	29.66388972	NaN	7.810932202	2067.459174	1947.856564	719.5706896	1.545417	NaN	NaN	NaN	NaN	NaN	8.5, S
'04-Nov-2022 07:00:00'	41.54166667	1	21.5	NaN	21.50439607	29.6650441	NaN	7.810990535	2067.358258	1947.828052	719.9483649	1.544720628	NaN	NaN	NaN	NaN	NaN	8.5, S
'04-Nov-2022 08:00:00'	41.58333333	1	21.525	NaN	21.50513278	29.66619528	NaN	7.811048868	2067.257341	1947.799541	720.3173245	1.544020219	NaN	NaN	NaN	NaN	NaN	8.5, S
'04-Nov-2022 09:00:00'	41.625	1	21.6	NaN	21.50542722	29.66734056	NaN	7.811107202	2067.156424	1947.771029	720.6739917	1.543314159	NaN	NaN	NaN	NaN	NaN	8.5, S
'04-Nov-2022 10:00:00'	41.66666667	1	21.6	NaN	21.50534916	29.66851376	NaN	7.811165535	2067.055508	1947.742518	721.0209149	1.542602948	NaN	NaN	NaN	NaN	NaN	8.5, S
'04-Nov-2022 11:00:00'	41.70833333	1	21.60833333	NaN	21.50579361	29.66962056	NaN	7.811223868	2066.954591	1947.714007	721.3816428	1.541899596	NaN	NaN	NaN	NaN	NaN	8.5, S
'04-Nov-2022 12:00:00'	41.75	1	21.36666667	NaN	21.50733917	29.67069861	NaN	7.811282202	2066.853674	1947.685495	721.7731814	1.541211259	NaN	NaN	NaN	NaN	NaN	8.5, S
'04-Nov-2022 13:00:00'	41.79166667	1	20.78333333	NaN	21.51166713	29.67168062	NaN	7.811340535	2066.752758	1947.656984	722.2418316	1.540560963	NaN	NaN	NaN	NaN	NaN	8.5, S
'04-Nov-2022 14:00:00'	41.83333333	1	20.74166667	NaN	21.51860917	29.67256056	NaN	7.811628035	2066.651841	1947.628472	722.7828646	1.539946545	NaN	NaN	NaN	NaN	NaN	8.5, S
'04-Nov-2022 15:00:00'	41.875	1	20.13333333	NaN	21.52693417	29.67340111	NaN	7.811915535	2066.550924	1947.599961	723.362743	1.539350963	NaN	NaN	NaN	NaN	NaN	8.5, S
'04-Nov-2022 16:00:00'	41.91666667	1	19.87272727	NaN	21.53646	29.67415803	NaN	7.812203035	2066.450008	1947.571449	723.9756107	1.538772368	NaN	NaN	NaN	NaN	NaN	8.5, S
'04-Nov-2022 17:00:00'	41.95833333	1	19.90833333	NaN	21.53416361	29.67522167	NaN	7.812490535	2066.349091	1947.542938	724.2599581	1.538034004	NaN	NaN	NaN	NaN	NaN	8.5, S
'04-Nov-2022 18:00:00'	42	1	20.33333333	NaN	21.53581556	29.67612056	NaN	7.812778035	2066.248174	1947.514426	724.6533298	1.537349924	NaN	NaN	NaN	NaN	NaN	8.5, S
'04-Nov-2022 19:00:00'	42.04166667	1	21.175	NaN	21.52623006	29.67728343	NaN	7.813065535	2066.147257	1947.485915	724.7335121	1.536514474	NaN	NaN	NaN	NaN	NaN	8.5, S
'04-Nov-2022 20:00:00'	42.08333333	1	21.44166667	NaN	21.51242278	29.67850556	NaN	7.813353035	2066.046341	1947.457404	724.6953291	1.535622896	NaN	NaN	NaN	NaN	NaN	8.5, S
'04-Nov-2022 21:00:00'	42.125	1	21.55	NaN	21.49868417	29.67959472	NaN	7.813640535	2065.945424	1947.428892	724.6568148	1.534734191	NaN	NaN	NaN	NaN	NaN	8.5, S
'04-Nov-2022 22:00:00'	42.16666667	1	20.725	NaN	21.48907697	29.68065	NaN	7.813928035	2065.844507	1947.400381	724.7347465	1.533900561	NaN	NaN	NaN	NaN	NaN	8.5, S
'04-Nov-2022 23:00:00'	42.20833333	1	20.01666667	NaN	21.49338889	29.68141694	NaN	7.814215535	2065.743591	1947.371869	725.2018645	1.53325382	NaN	NaN	NaN	NaN	NaN	8.5, S
'05-Nov-2022 00:00:00'	42.25	1	19.925	NaN	21.50117333	29.68217722	NaN	7.814503035	2065.642674	1947.343358	725.7676654	1.532652932	NaN	NaN	NaN	NaN	NaN	8.5, S
'05-Nov-2022 01:00:00'	42.29166667	1	19.73333333	NaN	21.5109309	29.68289775	NaN	7.814790535	2065.541757	1947.314846	726.3892249	1.532078584	NaN	NaN	NaN	NaN	NaN	8.5, S
'05-Nov-2022 02:00:00'	42.33333333	1	19.75	NaN	21.51197194	29.68382611	NaN	7.815078035	2065.440841	1947.286335	726.7676395	1.531387078	NaN	NaN	NaN	NaN	NaN	8.5, S
'05-Nov-2022 03:00:00'	42.375	1	19.64166667	NaN	21.50196583	29.68495528	NaN	7.815365535	2065.339924	1947.257823	726.8362873	1.530547952	NaN	NaN	NaN	NaN	NaN	8.5, S
'05-Nov-2022 04:00:00'	42.41666667	1	19.73333333	NaN	21.48946629	29.68604944	NaN	7.815653035	2065.239007	1947.229312	726.8336316	1.529676747	NaN	NaN	NaN	NaN	NaN	8.5, S
'05-Nov-2022 05:00:00'	42.45833333	1	19.675	NaN	21.47493861	29.687165	NaN	7.815940535	2065.138091	1947.200801	726.7738775	1.528778935	NaN	NaN	NaN	NaN	NaN	8.5, S
'05-Nov-2022 06:00:00'	42.5	1	19.74166667	NaN	21.460985	29.68826278	NaN	7.816228035	2065.037174	1947.172289	726.7301908	1.52788919	NaN	NaN	NaN	NaN	NaN	8.5, S
'05-Nov-2022 07:00:00'	42.54166667	1	19.54166667	NaN	21.44547296	29.68933634	NaN	7.816515535	2064.936257	1947.143778	726.6419297	1.526979627	NaN	NaN	NaN	NaN	NaN	8.5, S
'05-Nov-2022 08:00:00'	42.58333333	1	19.54166667	NaN	21.43253444	29.69037167	NaN	7.816803035	2064.835341	1947.115266	726.6261211	1.526104577	NaN	NaN	NaN	NaN	NaN	8.5, S
'05-Nov-2022 09:00:00'	42.625	1	19.49166667	NaN	21.41877694	29.69138917	NaN	7.817090535	2064.734424	1947.086755	726.5868398	1.525219315	NaN	NaN	NaN	NaN	NaN	8.5, S
'05-Nov-2022 10:00:00'	42.66666667	1	19.55	NaN	21.40888567	29.69233399	NaN	7.817378035	2064.633507	1947.058243	726.6560917	1.524385817	NaN	NaN	NaN	NaN	NaN	8.5, S
'05-Nov-2022 11:00:00'	42.70833333	1	19.54166667	NaN	21.39421583	29.69336028	NaN	7.817665535	2064.53259	1947.029732	726.5912483	1.523489085	NaN	NaN	NaN	NaN	NaN	8.5, S
'05-Nov-2022 12:00:00'	42.75	1	19.65833333	NaN	21.37976889	29.69441222	NaN	7.817953035	2064.431674	1947.001221	726.5332788	1.522595265	NaN	NaN	NaN	NaN	NaN	8.5, S
'05-Nov-2022 13:00:00'	42.79166667	1	19.50833333	NaN	21.36393831	29.69547944	NaN	7.818240535	2064.330757	1946.972709	726.4364014	1.521683515	NaN	NaN	NaN	NaN	NaN	8.5, S
'05-Nov-2022 14:00:00'	42.83333333	1	19.66666667	NaN	21.34971191	29.69649446	NaN	7.818603035	2064.22984	1946.944198	726.384216	1.520793668	NaN	NaN	NaN	NaN	NaN	8.5, S
'05-Nov-2022 15:00:00'	42.875	1	19.6	NaN	21.33540972	29.69753	NaN	7.818965535	2064.128924	1946.915686	726.3303347	1.51990289	NaN	NaN	NaN	NaN	NaN	8.5, S
'05-Nov-2022 16:00:00'	42.91666667	1	19.55833333	NaN	21.32301489	29.69856798	NaN	7.819328035	2064.028007	1946.887175	726.3307167	1.519037229	NaN	NaN	NaN	NaN	NaN	8.5, S
'05-Nov-2022 17:00:00'	42.95833333	1	19.66666667	NaN	21.309385	29.69964167	NaN	7.819690535	2063.92709	1946.858663	726.2967725	1.518155333	NaN	NaN	NaN	NaN	NaN	8.5, S
'05-Nov-2022 18:00:00'	43	1	19.55833333	NaN	21.29628917	29.70071417	NaN	7.820053035	2063.826174	1946.830152	726.2780531	1.517280695	NaN	NaN	NaN	NaN	NaN	8.5, S
'05-Nov-2022 19:00:00'	43.04166667	1	19.63333333	NaN	21.28363258	29.70177837	NaN	7.820415535	2063.725257	1946.80164	726.2717423	1.516412156	NaN	NaN	NaN	NaN	NaN	8.5, S
'05-Nov-2022 20:00:00'	43.08333333	1	19.49166667	NaN	21.27037556	29.70288528	NaN	7.820778035	2063.62434	1946.773129	726.2492389	1.515535577	NaN	NaN	NaN	NaN	NaN	8.5, S
'05-Nov-2022 21:00:00'	43.125	1	19.59166667	NaN	21.25905111	29.70392639	NaN	7.821140535	2063.523424	1946.744618	726.2805073	1.514685174	NaN	NaN	NaN	NaN	NaN	8.5, S
'05-Nov-2022 22:00:00'	43.16666667	1	19.50833333	NaN	21.24699522	29.70497416	NaN	7.821503035	2063.422507	1946.716106	726.2912256	1.513825462	NaN	NaN	NaN	NaN	NaN	8.5, S
'05-Nov-2022 23:00:00'	43.20833333	1	19.59090909	NaN	21.23614444	29.70601472	NaN	7.821865535	2063.32159	1946.687595	726.3361165	1.512981725	NaN	NaN	NaN	NaN	NaN	8.5, S
'06-Nov-2022 00:00:00'	43.25	1	19.46666667	NaN	21.22436295	29.70702618	NaN	7.822228035	2063.220673	1946.659083	726.3541638	1.512126539	NaN	NaN	NaN	NaN	NaN	8.5, S
'06-Nov-2022 01:00:00'	43.29166667	1	19.46666667	NaN	21.21408347	29.70801204	NaN	7.822590535	2063.119757	1946.630572	726.4144923	1.51129137	NaN	NaN	NaN	NaN	NaN	8.5, S
'06-Nov-2022 02:00:00'	43.33333333	1	19.51666667	NaN	21.20236722	29.70902861	NaN	7.822953035	2063.01884	1946.60206	726.43467	1.510437481	NaN	NaN	NaN	NaN	NaN	8.5, S
'06-Nov-2022 03:00:00'	43.375	1	19.44166667	NaN	21.19201361	29.7100325	NaN	7.823315535	2062.917923	1946.573549	726.493408	1.509601624	NaN	NaN	NaN	NaN	NaN	8.5, S
'06-Nov-2022 04:00:00'	43.41666667	1	19.46666667	NaN	21.18093146	29.71105618	NaN	7.823678035	2062.817007	1946.545037	726.5319071	1.508756355	NaN	NaN	NaN	NaN	NaN	8.5, S
'06-Nov-2022 05:00:00'	43.45833333	1	19.45	NaN	21.17084472	29.71204889	NaN	7.824040535	2062.71609	1946.516526	726.5982217	1.507924567	NaN	NaN	NaN	NaN	NaN	8.5, S
'06-Nov-2022 06:00:00'	43.5	1	19.425	NaN	21.1597025	29.71305389	NaN	7.824403035	2062.615173	1946.488015	726.6348752	1.507079247	NaN	NaN	NaN	NaN	NaN	8.5, S
'06-Nov-2022 07:00:00'	43.54166667	1	19.44166667	NaN	21.14988708	29.71400955	NaN	7.824765535	2062.514257	1946.459503	726.7084367	1.506251888	NaN	NaN	NaN	NaN	NaN	8.5, S
'06-Nov-2022 08:00:00'	43.58333333	1	19.39	NaN	21.13888194	29.71499139	NaN	7.825128035	2062.41334	1946.430992	726.7487662	1.505409111	NaN	NaN	NaN	NaN	NaN	8.5, S
'06-Nov-2022 09:00:00'	43.625	1	19.475	NaN	21.12857167	29.71595694	NaN	7.825490535	2062.312423	1946.40248	726.8086444	1.504575731	NaN	NaN	NaN	NaN	NaN	8.5, S
'06-Nov-2022 10:00:00'	43.66666667	1	19.49166667	NaN	21.11780845	29.71696169	NaN	7.825853035	2062.211507	1946.373969	726.8564484	1.503736286	NaN	NaN	NaN	NaN	NaN	8.5, S
'06-Nov-2022 11:00:00'	43.70833333	1	19.43636364	NaN	21.10746908	29.7179273	NaN	7.826215535	2062.11059	1946.345457	726.9156985	1.502903013	NaN	NaN	NaN	NaN	NaN	8.5, S
'06-Nov-2022 12:00:00'	43.75	1	19.6	NaN	21.09675429	29.71891828	NaN	7.826578035	2062.009673	1946.316946	726.9648295	1.502064847	NaN	NaN	NaN	NaN	NaN	8.5, S
'06-Nov-2022 13:00:00'	43.79166667	1	19.50833333	NaN	21.08676713	29.71985899	NaN	7.826940535	2061.908756	1946.288434	727.0338459	1.501236882	NaN	NaN	NaN	NaN	NaN	8.5, S
'06-Nov-2022 14:00:00'	43.83333333	1	19.48333333	NaN	21.0768225	29.72082944	NaN	7.827223868	2061.80784	1946.259923	727.1047015	1.500409339	NaN	NaN	NaN	NaN	NaN	8.5, S
'06-Nov-2022 15:00:00'	43.875	1	19.6	NaN	21.06878889	29.72178389	NaN	7.827507202	2061.706923	1946.231412	727.2297066	1.499606746	NaN	NaN	NaN	NaN	NaN	8.5, S
'06-Nov-2022 16:00:00'	43.91666667	1	19.45	NaN	21.06026882	29.72271461	NaN	7.827790535	2061.606006	1946.2029	727.3405747	1.498798404	NaN	NaN	NaN	NaN	NaN	8.5, S
'06-Nov-2022 17:00:00'	43.95833333	1	19.63333333	NaN	21.05263333	29.72366222	NaN	7.828073868	2061.50509	1946.174389	727.477015	1.498001412	NaN	NaN	NaN	NaN	NaN	8.5, S
'06-Nov-2022 18:00:00'	44	1	19.475	NaN	21.04451421	29.72466964	NaN	7.828357202	2061.404173	1946.145877	727.6008827	1.497197705	NaN	NaN	NaN	NaN	NaN	8.5, S
'06-Nov-2022 19:00:00'	44.04166667	1	19.55833333	NaN	21.03627395	29.72564566	NaN	7.828640535	2061.303256	1946.117366	727.7208634	1.496393031	NaN	NaN	NaN	NaN	NaN	8.5, S
'06-Nov-2022 20:00:00'	44.08333333	1	19.46666667	NaN	21.02957278	29.72659139	NaN	7.828923868	2061.20234	1946.088854	727.8842195	1.495608628	NaN	NaN	NaN	NaN	NaN	8.5, S
'06-Nov-2022 21:00:00'	44.125	1	19.6	NaN	21.02182639	29.72757861	NaN	7.829207202	2061.101423	1946.060343	728.0186964	1.494810545	NaN	NaN	NaN	NaN	NaN	8.5, S
'06-Nov-2022 22:00:00'	44.16666667	1	19.47272727	NaN	21.01541577	29.72854563	NaN	7.829490535	2061.000506	1946.031831	728.1909637	1.494029986	NaN	NaN	NaN	NaN	NaN	8.5, S
'06-Nov-2022 23:00:00'	44.20833333	1	19.54166667	NaN	21.00843019	29.72950776	NaN	7.829773868	2060.89959	1946.00332	728.3469086	1.493242323	NaN	NaN	NaN	NaN	NaN	8.5, S
'07-Nov-2022 00:00:00'	44.25	1	19.4	NaN	21.00193556	29.73041472	NaN	7.830057202	2060.798673	1945.974809	728.5159855	1.492461781	NaN	NaN	NaN	NaN	NaN	8.5, S
'07-Nov-2022 01:00:00'	44.29166667	1	19.525	NaN	20.99509522	29.73137528	NaN	7.830340535	2060.697756	1945.946297	728.6763041	1.491676371	NaN	NaN	NaN	NaN	NaN	8.5, S
'07-Nov-2022 02:00:00'	44.33333333	1	19.375	NaN	20.98917806	29.73227861	NaN	7.830623868	2060.59684	1945.917786	728.8620418	1.490903615	NaN	NaN	NaN	NaN	NaN	8.5, S
'07-Nov-2022 03:00:00'	44.375	1	19.50833333	NaN	20.98261333	29.73319056	NaN	7.830907202	2060.495923	1945.889274	729.0296207	1.490122674	NaN	NaN	NaN	NaN	NaN	8.5, S
'07-Nov-2022 04:00:00'	44.41666667	1	19.39166667	NaN	20.97656292	29.73411264	NaN	7.831190535	2060.395006	1945.860763	729.2121778	1.489348355	NaN	NaN	NaN	NaN	NaN	8.5, S
'07-Nov-2022 05:00:00'	44.45833333	1	19.5	NaN	20.96948774	29.73502006	NaN	7.831473868	2060.294089	1945.832251	729.3653955	1.488561332	NaN	NaN	NaN	NaN	NaN	8.5, S
'07-Nov-2022 06:00:00'	44.5	1	19.375	NaN	20.9632795	29.73592715	NaN	7.831757202	2060.193173	1945.80374	729.5434627	1.487785547	NaN	NaN	NaN	NaN	NaN	8.5, S
'07-Nov-2022 07:00:00'	44.54166667	1	19.45	NaN	20.95582135	29.73691489	NaN	7.832040535	2060.092256	1945.775229	729.6874501	1.486993075	NaN	NaN	NaN	NaN	NaN	8.5, S
'07-Nov-2022 08:00:00'	44.58333333	1	19.375	NaN	20.94972028	29.73780389	NaN	7.832323868	2059.991339	1945.746717	729.8685266	1.48621924	NaN	NaN	NaN	NaN	NaN	8.5, S
'07-Nov-2022 09:00:00'	44.625	1	19.51666667	NaN	20.94286072	29.73874652	NaN	7.832607202	2059.890423	1945.718206	730.0290533	1.485435303	NaN	NaN	NaN	NaN	NaN	8.5, S
'07-Nov-2022 10:00:00'	44.66666667	1	19.45	NaN	20.9371465	29.73965098	NaN	7.832890535	2059.789506	1945.689694	730.221728	1.484666569	NaN	NaN	NaN	NaN	NaN	8.5, S
'07-Nov-2022 11:00:00'	44.70833333	1	19.64166667	NaN	20.93004639	29.74054528	NaN	7.833173868	2059.688589	1945.661183	730.3747979	1.48388052	NaN	NaN	NaN	NaN	NaN	8.5, S
'07-Nov-2022 12:00:00'	44.75	1	19.6	NaN	20.92386611	29.74144694	NaN	7.833457202	2059.587673	1945.632671	730.5543987	1.48310626	NaN	NaN	NaN	NaN	NaN	8.5, S
'07-Nov-2022 13:00:00'	44.79166667	1	19.50909091	NaN	20.91687865	29.74232697	NaN	7.833740535	2059.486756	1945.60416	730.7106975	1.48232219	NaN	NaN	NaN	NaN	NaN	8.5, S
'07-Nov-2022 14:00:00'	44.83333333	1	19.70833333	NaN	20.91162583	29.74325167	NaN	7.833815535	2059.385839	1945.575648	730.9174872	1.481559792	NaN	NaN	NaN	NaN	NaN	8.5, S
'07-Nov-2022 15:00:00'	44.875	1	19.55	NaN	20.90629889	29.74414167	NaN	7.833890535	2059.284923	1945.547137	731.1216953	1.480797035	NaN	NaN	NaN	NaN	NaN	8.5, S
'07-Nov-2022 16:00:00'	44.91666667	1	19.56666667	NaN	20.90308197	29.74507606	NaN	7.833965535	2059.184006	1945.518626	731.3871737	1.480060676	NaN	NaN	NaN	NaN	NaN	8.5, S
'07-Nov-2022 17:00:00'	44.95833333	1	19.525	NaN	20.89892105	29.7460133	NaN	7.834040535	2059.083089	1945.490114	731.625896	1.479312471	NaN	NaN	NaN	NaN	NaN	8.5, S
'07-Nov-2022 18:00:00'	45	1	19.57272727	NaN	20.89188333	29.74709194	NaN	7.834115535	2058.982172	1945.461603	731.785019	1.478526325	NaN	NaN	NaN	NaN	2089.359333	8.5, S
'07-Nov-2022 19:00:00'	45.04166667	1	19.7	NaN	20.88486966	29.74822079	NaN	7.834190535	2058.881256	1945.433091	731.9458577	1.47774009	NaN	NaN	2058.881256	1945.433091	NaN	8.5, S
'07-Nov-2022 20:00:00'	45.08333333	1	19.44545455	NaN	20.87620585	29.74942006	NaN	7.834265535	2058.969338	1945.40358	731.1236329	1.478694746	NaN	NaN	NaN	NaN	NaN	8.5, S
'07-Nov-2022 21:00:00'	45.125	1	20.05	NaN	20.86437922	29.75069224	NaN	7.834340535	2059.05742	1945.374068	730.2134966	1.479608688	NaN	NaN	NaN	NaN	NaN	8.5, S
'07-Nov-2022 22:00:00'	45.16666667	1	20.94166667	NaN	20.85191713	29.75203202	NaN	7.834415535	2059.145502	1945.344556	729.2877219	1.480513975	NaN	NaN	NaN	NaN	NaN	8.5, S
'07-Nov-2022 23:00:00'	45.20833333	1	21.15	NaN	20.83661222	29.75358194	NaN	7.834490535	2059.233584	1945.315045	728.2860146	1.481380982	NaN	NaN	NaN	NaN	NaN	8.5, S
'08-Nov-2022 00:00:00'	45.25	1	21.2	NaN	20.82190195	29.75509192	NaN	7.834565535	2059.321667	1945.285533	727.3020127	1.482256171	NaN	NaN	NaN	NaN	NaN	8.5, S
'08-Nov-2022 01:00:00'	45.29166667	1	21.25	NaN	20.80735574	29.75661317	NaN	7.834640535	2059.409749	1945.256021	726.3243276	1.483133488	NaN	NaN	NaN	NaN	NaN	8.5, S
'08-Nov-2022 02:00:00'	45.33333333	1	21.23333333	NaN	20.79229861	29.75825194	NaN	7.834715535	2059.497831	1945.22651	725.3356618	1.484003132	NaN	NaN	NaN	NaN	NaN	8.5, S
'08-Nov-2022 03:00:00'	45.375	1	21.23333333	NaN	20.79156722	29.75958139	NaN	7.834790535	2059.585913	1945.196998	724.7492476	1.485057902	NaN	NaN	NaN	NaN	NaN	8.5, S
'08-Nov-2022 04:00:00'	45.41666667	1	21.24	NaN	20.79347191	29.76095393	NaN	7.834865535	2059.673995	1945.167486	724.2390141	1.486145766	NaN	NaN	NaN	NaN	NaN	8.5, S
'08-Nov-2022 05:00:00'	45.45833333	1	21.24166667	NaN	20.79590917	29.76234278	NaN	7.834940535	2059.762077	1945.137975	723.7447487	1.487240431	NaN	NaN	NaN	NaN	NaN	8.5, S
'08-Nov-2022 06:00:00'	45.5	1	21.15	NaN	20.79846694	29.76369833	NaN	7.835015535	2059.850159	1945.108463	723.2538798	1.488337273	NaN	NaN	NaN	NaN	NaN	8.5, S
'08-Nov-2022 07:00:00'	45.54166667	1	21.025	NaN	20.80014366	29.76508338	NaN	7.835090535	2059.938242	1945.078951	722.7391717	1.489422849	NaN	NaN	NaN	NaN	NaN	8.5, S
'08-Nov-2022 08:00:00'	45.58333333	1	21.04166667	NaN	20.80112889	29.76650167	NaN	7.835165535	2060.026324	1945.04944	722.2060975	1.490499502	NaN	NaN	NaN	NaN	NaN	8.5, S
'08-Nov-2022 09:00:00'	45.625	1	20.99166667	NaN	20.8012097	29.76795845	NaN	7.835240535	2060.114406	1945.019928	721.6487712	1.491564457	NaN	NaN	NaN	NaN	NaN	8.5, S
'08-Nov-2022 10:00:00'	45.66666667	1	21.15833333	NaN	20.80085955	29.76942247	NaN	7.835315535	2060.202488	1944.990416	721.0800612	1.492624081	NaN	NaN	NaN	NaN	NaN	8.5, S
'08-Nov-2022 11:00:00'	45.70833333	1	21.30833333	NaN	20.79953194	29.77094278	NaN	7.835390535	2060.29057	1944.960905	720.4854375	1.493670843	NaN	NaN	NaN	NaN	NaN	8.5, S
'08-Nov-2022 12:00:00'	45.75	1	21.4	NaN	20.79629359	29.77246797	NaN	7.835465535	2060.378652	1944.931393	719.8377435	1.49469349	NaN	NaN	NaN	NaN	NaN	8.5, S
'08-Nov-2022 13:00:00'	45.79166667	1	21.4	NaN	20.79217507	29.77404006	NaN	7.835540535	2060.466734	1944.901881	719.166875	1.495704591	NaN	NaN	NaN	NaN	NaN	8.5, S
'08-Nov-2022 14:00:00'	45.83333333	1	21.4	NaN	20.78817944	29.7755925	NaN	7.835786368	2060.554817	1944.87237	718.4999504	1.49671768	NaN	NaN	NaN	NaN	NaN	8.5, S
'08-Nov-2022 15:00:00'	45.875	1	21.375	NaN	20.78685111	29.77709278	NaN	7.836032202	2060.642899	1944.842858	717.9079419	1.497765488	NaN	NaN	NaN	NaN	2086.774084	8.5, S
'08-Nov-2022 16:00:00'	45.91666667	1	21.34166667	NaN	20.78799802	29.77854153	NaN	7.836278035	2060.730981	1944.813346	717.3852967	1.498845598	NaN	NaN	NaN	NaN	NaN	8.5, S
'08-Nov-2022 17:00:00'	45.95833333	1	21.31666667	NaN	20.7899144	29.78002327	NaN	7.836523868	2060.819063	1944.783835	716.8854507	1.499935333	NaN	NaN	NaN	NaN	NaN	8.5, S
'08-Nov-2022 18:00:00'	46	1	21.25	NaN	20.79112056	29.78153833	NaN	7.836769702	2060.907145	1944.754323	716.3668337	1.501015869	NaN	NaN	NaN	NaN	NaN	8.5, S
'08-Nov-2022 19:00:00'	46.04166667	1	21.13333333	NaN	20.79222225	29.7830262	NaN	7.837015535	2060.995227	1944.724811	715.8454134	1.502095636	NaN	NaN	NaN	NaN	NaN	8.5, S
'08-Nov-2022 20:00:00'	46.08333333	1	21.15	NaN	20.79267645	29.78457645	NaN	7.837261368	2061.08331	1944.6953	715.3075442	1.503166634	NaN	NaN	NaN	NaN	NaN	8.5, S
'08-Nov-2022 21:00:00'	46.125	1	21.04166667	NaN	20.79229444	29.78616278	NaN	7.837507202	2061.171392	1944.665788	714.7475134	1.504226765	NaN	NaN	NaN	NaN	NaN	8.5, S
'08-Nov-2022 22:00:00'	46.16666667	1	21	NaN	20.79097634	29.78771127	NaN	7.837753035	2061.259474	1944.636276	714.1612796	1.50527564	NaN	NaN	NaN	NaN	NaN	8.5, S
'08-Nov-2022 23:00:00'	46.20833333	1	20.91666667	NaN	20.78861778	29.78930389	NaN	7.837998868	2061.347556	1944.606765	713.5474163	1.506310924	NaN	NaN	NaN	NaN	NaN	8.5, S
'09-Nov-2022 00:00:00'	46.25	1	20.93333333	NaN	20.784545	29.79094306	NaN	7.838244702	2061.435638	1944.577253	712.8872023	1.507323983	NaN	NaN	NaN	NaN	NaN	8.5, S
'09-Nov-2022 01:00:00'	46.29166667	1	20.875	NaN	20.7785191	29.79264916	NaN	7.838490535	2061.52372	1944.547741	712.1744396	1.508311506	NaN	NaN	NaN	NaN	NaN	8.5, S
'09-Nov-2022 02:00:00'	46.33333333	1	20.78333333	NaN	20.77108579	29.79442869	NaN	7.838736368	2061.611802	1944.51823	711.4246047	1.509280358	NaN	NaN	NaN	NaN	NaN	8.5, S
'09-Nov-2022 03:00:00'	46.375	1	20.63333333	NaN	20.76299446	29.79620471	NaN	7.838982202	2061.699885	1944.488718	710.6573442	1.510241027	NaN	NaN	NaN	NaN	NaN	8.5, S
'09-Nov-2022 04:00:00'	46.41666667	1	20.575	NaN	20.75441489	29.79797303	NaN	7.839228035	2061.787967	1944.459206	709.8773633	1.511195727	NaN	NaN	NaN	NaN	NaN	8.5, S
'09-Nov-2022 05:00:00'	46.45833333	1	20.675	NaN	20.74589192	29.79974875	NaN	7.839473868	2061.876049	1944.429695	709.1001166	1.512151222	NaN	NaN	NaN	NaN	NaN	8.5, S
'09-Nov-2022 06:00:00'	46.5	1	20.66666667	NaN	20.7375375	29.80149056	NaN	7.839719702	2061.964131	1944.400183	708.32799	1.513109445	NaN	NaN	NaN	NaN	NaN	8.5, S
'09-Nov-2022 07:00:00'	46.54166667	1	20.60833333	NaN	20.72900336	29.8032112	NaN	7.839965535	2062.052213	1944.370671	707.5515237	1.514065799	NaN	NaN	NaN	NaN	NaN	8.5, S
'09-Nov-2022 08:00:00'	46.58333333	1	20.6	NaN	20.71996944	29.80495639	NaN	7.840211368	2062.140295	1944.34116	706.762649	1.515015639	NaN	NaN	NaN	NaN	NaN	8.5, S
'09-Nov-2022 09:00:00'	46.625	1	20.73333333	NaN	20.71038306	29.80670639	NaN	7.840457202	2062.228377	1944.311648	705.9596022	1.515958533	NaN	NaN	NaN	NaN	NaN	8.5, S
'09-Nov-2022 10:00:00'	46.66666667	1	21.025	NaN	20.70105944	29.80842028	NaN	7.840703035	2062.31646	1944.282136	705.1642814	1.516905384	NaN	NaN	NaN	NaN	NaN	8.5, S
'09-Nov-2022 11:00:00'	46.70833333	1	21.19166667	NaN	20.69189721	29.81012646	NaN	7.840948868	2062.404542	1944.252625	704.3743538	1.517854551	NaN	NaN	NaN	NaN	NaN	8.5, S
'09-Nov-2022 12:00:00'	46.75	1	21.26666667	NaN	20.68278199	29.8118446	NaN	7.841194702	2062.492624	1944.223113	703.5869853	1.518804333	NaN	NaN	NaN	NaN	NaN	8.5, S
'09-Nov-2022 13:00:00'	46.79166667	1	21.28333333	NaN	20.6743323	29.81356348	NaN	7.841440535	2062.580706	1944.193601	702.8190445	1.519762761	NaN	NaN	NaN	NaN	NaN	8.5, S
'09-Nov-2022 14:00:00'	46.83333333	1	21.25833333	NaN	20.66816546	29.81522841	NaN	7.841423868	2062.668788	1944.16409	702.1141217	1.520751154	NaN	NaN	NaN	NaN	NaN	8.5, S
'09-Nov-2022 15:00:00'	46.875	1	21.25	NaN	20.66626039	29.81678116	NaN	7.841407202	2062.75687	1944.134578	701.525562	1.521795511	NaN	NaN	NaN	NaN	NaN	8.5, S
'09-Nov-2022 16:00:00'	46.91666667	1	21.20833333	NaN	20.66817949	29.81820421	NaN	7.841390535	2062.844952	1944.105067	701.0407513	1.522890514	NaN	NaN	NaN	NaN	NaN	8.5, S
'09-Nov-2022 17:00:00'	46.95833333	1	21.10833333	NaN	20.67199556	29.81956583	NaN	7.841373868	2062.933035	1944.075555	700.6076363	1.524010753	NaN	NaN	NaN	NaN	NaN	8.5, S
'09-Nov-2022 18:00:00'	47	1	21.1	NaN	20.67681058	29.8208766	NaN	7.841357202	2063.021117	1944.046043	700.2016136	1.525144654	NaN	NaN	NaN	NaN	NaN	8.5, S
'09-Nov-2022 19:00:00'	47.04166667	1	21.1	NaN	20.68174678	29.82215686	NaN	7.841340535	2063.109199	1944.016532	699.7988609	1.526280756	NaN	NaN	NaN	NaN	NaN	8.5, S
'09-Nov-2022 20:00:00'	47.08333333	1	21.03333333	NaN	20.68581083	29.82352806	NaN	7.841323868	2063.197281	1943.98702	699.3741761	1.527404841	NaN	NaN	NaN	NaN	NaN	8.5, S
'09-Nov-2022 21:00:00'	47.125	1	21.04166667	NaN	20.68909471	29.82487827	NaN	7.841307202	2063.285363	1943.957508	698.9281956	1.528519457	NaN	NaN	NaN	NaN	NaN	8.5, S
'09-Nov-2022 22:00:00'	47.16666667	1	20.95454545	NaN	20.69202079	29.82627191	NaN	7.841290535	2063.373445	1943.927997	698.4736546	1.5296292	NaN	NaN	NaN	NaN	NaN	8.5, S
'09-Nov-2022 23:00:00'	47.20833333	1	20.9	NaN	20.69415235	29.82764543	NaN	7.841273868	2063.461528	1943.898485	697.9975008	1.530729256	NaN	NaN	NaN	NaN	NaN	8.5, S
'10-Nov-2022 00:00:00'	47.25	1	20.86666667	NaN	20.6960525	29.82901278	NaN	7.841257202	2063.54961	1943.868973	697.5154456	1.531826659	NaN	NaN	NaN	NaN	NaN	8.5, S
'10-Nov-2022 01:00:00'	47.29166667	1	20.91666667	NaN	20.69774901	29.8303862	NaN	7.841240535	2063.637692	1943.839462	697.0284719	1.532921608	NaN	NaN	NaN	NaN	NaN	8.5, S
'10-Nov-2022 02:00:00'	47.33333333	1	20.93333333	NaN	20.6992856	29.83176676	NaN	7.841223868	2063.725774	1943.80995	696.5378036	1.534014647	NaN	NaN	NaN	NaN	NaN	8.5, S
'10-Nov-2022 03:00:00'	47.375	1	20.925	NaN	20.70026806	29.83311417	NaN	7.841207202	2063.813856	1943.780438	696.0319754	1.535101218	NaN	NaN	NaN	NaN	NaN	8.5, S
'10-Nov-2022 04:00:00'	47.41666667	1	20.875	NaN	20.70105253	29.83447163	NaN	7.841190535	2063.901938	1943.750927	695.5214926	1.536185344	NaN	NaN	NaN	NaN	NaN	8.5, S
'10-Nov-2022 05:00:00'	47.45833333	1	20.90833333	NaN	20.70153175	29.83587382	NaN	7.841173868	2063.99002	1943.721415	695.0040295	1.537265208	NaN	NaN	NaN	NaN	NaN	8.5, S
'10-Nov-2022 06:00:00'	47.5	1	20.91666667	NaN	20.70211551	29.83721884	NaN	7.841157202	2064.078103	1943.691903	694.4890405	1.538347352	NaN	NaN	NaN	NaN	NaN	8.5, S
'10-Nov-2022 07:00:00'	47.54166667	1	20.86666667	NaN	20.70278483	29.83856011	NaN	7.841140535	2064.166185	1943.662392	693.9769177	1.539430862	NaN	NaN	NaN	NaN	NaN	8.5, S
'10-Nov-2022 08:00:00'	47.58333333	1	21.025	NaN	20.70365111	29.83990111	NaN	7.841123868	2064.254267	1943.63288	693.4707518	1.54051713	NaN	NaN	NaN	NaN	NaN	8.5, S
'10-Nov-2022 09:00:00'	47.625	1	21.08333333	NaN	20.70513398	29.84121309	NaN	7.841107202	2064.342349	1943.603368	692.9814708	1.541611919	NaN	NaN	NaN	NaN	NaN	8.5, S
'10-Nov-2022 10:00:00'	47.66666667	1	21.175	NaN	20.70697283	29.84248964	NaN	7.841090535	2064.430431	1943.573857	692.5018374	1.542711967	NaN	NaN	NaN	NaN	NaN	8.5, S
'10-Nov-2022 11:00:00'	47.70833333	1	21.36666667	NaN	20.70946861	29.84372583	NaN	7.841073868	2064.518513	1943.544345	692.0399375	1.543821219	NaN	NaN	NaN	NaN	NaN	8.5, S
'10-Nov-2022 12:00:00'	47.75	1	21.2	NaN	20.71173092	29.84498189	NaN	7.841057202	2064.606595	1943.514833	691.5725557	1.544927453	NaN	NaN	NaN	NaN	NaN	8.5, S
'10-Nov-2022 13:00:00'	47.79166667	1	20.59166667	NaN	20.71506433	29.84618062	NaN	7.841040535	2064.694678	1943.485322	691.1338352	1.546048458	NaN	NaN	NaN	NaN	NaN	8.5, S
'10-Nov-2022 14:00:00'	47.83333333	1	19.7	NaN	20.72046861	29.84732417	NaN	7.841061368	2064.78276	1943.45581	690.7509161	1.547197123	NaN	NaN	NaN	NaN	NaN	8.5, S
'10-Nov-2022 15:00:00'	47.875	1	19.48333333	NaN	20.72978172	29.84835125	NaN	7.841082202	2064.870842	1943.426298	690.4725631	1.548397991	NaN	NaN	NaN	NaN	NaN	8.5, S
'10-Nov-2022 16:00:00'	47.91666667	1	19.94166667	NaN	20.7424809	29.84931096	NaN	7.841103035	2064.958924	1943.396787	690.2853004	1.549643793	NaN	NaN	NaN	NaN	NaN	8.5, S
'10-Nov-2022 17:00:00'	47.95833333	1	20.73333333	NaN	20.75512173	29.85029861	NaN	7.841123868	2065.047006	1943.367275	690.0972083	1.550888894	NaN	NaN	NaN	NaN	NaN	8.5, S
'10-Nov-2022 18:00:00'	48	1	21.10833333	NaN	20.76182111	29.85138722	NaN	7.841144702	2065.135088	1943.337763	689.7499623	1.552056265	NaN	NaN	NaN	NaN	NaN	8.5, S
'10-Nov-2022 19:00:00'	48.04166667	1	21.29166667	NaN	20.75586723	29.85274622	NaN	7.841165535	2065.22317	1943.308252	689.0647886	1.553056771	NaN	NaN	NaN	NaN	NaN	8.5, S
'10-Nov-2022 20:00:00'	48.08333333	1	21.325	NaN	20.74468861	29.85413389	NaN	7.841186368	2065.311253	1943.27874	688.2395284	1.553989492	NaN	NaN	NaN	NaN	NaN	8.5, S
'10-Nov-2022 21:00:00'	48.125	1	21.4	NaN	20.73975125	29.85536574	NaN	7.841207202	2065.399335	1943.249228	687.5815324	1.555005107	NaN	NaN	NaN	NaN	NaN	8.5, S
'10-Nov-2022 22:00:00'	48.16666667	1	21.4	NaN	20.74509188	29.85636218	NaN	7.841228035	2065.487417	1943.219717	687.1981287	1.55615694	NaN	NaN	NaN	NaN	NaN	8.5, S
'10-Nov-2022 23:00:00'	48.20833333	1	21.41666667	NaN	20.7577525	29.85717583	NaN	7.841248868	2065.575499	1943.190205	687.0098402	1.557406221	NaN	NaN	NaN	NaN	NaN	8.5, S
'11-Nov-2022 00:00:00'	48.25	1	21.40833333	NaN	20.77313278	29.85793361	NaN	7.841269702	2065.663581	1943.160693	686.8943535	1.558691896	NaN	NaN	NaN	NaN	NaN	8.5, S
'11-Nov-2022 01:00:00'	48.29166667	1	21.43333333	NaN	20.78956685	29.85865618	NaN	7.841290535	2065.751663	1943.131182	686.806974	1.559992174	NaN	NaN	NaN	NaN	NaN	8.5, S
'11-Nov-2022 02:00:00'	48.33333333	1	21.44166667	NaN	20.80733482	29.85932089	NaN	7.841311368	2065.839746	1943.10167	686.7548674	1.561311025	NaN	NaN	NaN	NaN	NaN	8.5, S
'11-Nov-2022 03:00:00'	48.375	1	21.41666667	NaN	20.82530417	29.85996056	NaN	7.841332202	2065.927828	1943.072158	686.7079918	1.562633351	NaN	NaN	NaN	NaN	NaN	8.5, S
'11-Nov-2022 04:00:00'	48.41666667	1	21.5	NaN	20.8436591	29.8606381	NaN	7.841353035	2066.01591	1943.042647	686.672389	1.563960745	NaN	NaN	NaN	NaN	NaN	8.5, S
'11-Nov-2022 05:00:00'	48.45833333	1	21.5	NaN	20.86152833	29.86130139	NaN	7.841373868	2066.103992	1943.013135	686.6236435	1.565282544	NaN	NaN	NaN	NaN	NaN	8.5, S
'11-Nov-2022 06:00:00'	48.5	1	21.5	NaN	20.87860139	29.8619663	NaN	7.841394702	2066.192074	1942.983623	686.5536482	1.566594475	NaN	NaN	NaN	NaN	NaN	8.5, S
'11-Nov-2022 07:00:00'	48.54166667	1	21.51666667	NaN	20.89545815	29.86267725	NaN	7.841415535	2066.280156	1942.954112	686.4788191	1.5679035	NaN	NaN	NaN	NaN	NaN	8.5, S
'11-Nov-2022 08:00:00'	48.58333333	1	21.45	NaN	20.9123338	29.86335845	NaN	7.841436368	2066.368238	1942.9246	686.4042183	1.569213669	NaN	NaN	NaN	NaN	NaN	8.5, S
'11-Nov-2022 09:00:00'	48.625	1	20.05	NaN	20.929115	29.86403528	NaN	7.841457202	2066.456321	1942.895088	686.327218	1.57052317	NaN	NaN	NaN	NaN	NaN	8.5, S
'11-Nov-2022 10:00:00'	48.66666667	1	20.01666667	NaN	20.9456709	29.86472966	NaN	7.841478035	2066.544403	1942.865577	686.2446616	1.571830002	NaN	NaN	NaN	NaN	NaN	8.5, S
'11-Nov-2022 11:00:00'	48.70833333	1	19.78181818	NaN	20.9627036	29.86536731	NaN	7.841498868	2066.632485	1942.836065	686.1742284	1.573144324	NaN	NaN	NaN	NaN	NaN	8.5, S
'11-Nov-2022 12:00:00'	48.75	1	19.6	NaN	20.97994833	29.8660275	NaN	7.841519702	2066.720567	1942.806553	686.1101189	1.574461646	NaN	NaN	NaN	NaN	NaN	8.5, S
'11-Nov-2022 13:00:00'	48.79166667	1	19.625	NaN	20.99785534	29.86660056	NaN	7.841540535	2066.808649	1942.777042	686.0626088	1.575789324	NaN	NaN	NaN	NaN	NaN	8.5, S
'11-Nov-2022 14:00:00'	48.83333333	1	19.50833333	NaN	20.99918719	29.86763343	NaN	7.841569702	2066.896731	1942.74753	685.5762823	1.576893809	NaN	NaN	NaN	NaN	NaN	8.5, S
'11-Nov-2022 15:00:00'	48.875	1	19.54166667	NaN	20.99856981	29.86861856	NaN	7.841598868	2066.984813	1942.718018	685.0372	1.577973546	NaN	NaN	NaN	NaN	NaN	8.5, S
'11-Nov-2022 16:00:00'	48.91666667	1	19.45	NaN	20.99426732	29.86964338	NaN	7.841628035	2067.072896	1942.688507	684.4002453	1.579004554	NaN	NaN	NaN	NaN	NaN	8.5, S
'11-Nov-2022 17:00:00'	48.95833333	1	19.49166667	NaN	20.98727452	29.87066233	NaN	7.841657202	2067.160978	1942.658995	683.6916357	1.580000471	NaN	NaN	NaN	NaN	NaN	8.5, S
'11-Nov-2022 18:00:00'	49	1	19.44166667	NaN	20.98068833	29.87168222	NaN	7.841686368	2067.24906	1942.629483	682.9948677	1.581001886	NaN	NaN	NaN	NaN	NaN	8.5, S
'11-Nov-2022 19:00:00'	49.04166667	1	19.5	NaN	20.97280873	29.87265944	NaN	7.841715535	2067.337142	1942.599972	682.2635496	1.581987034	NaN	NaN	NaN	NaN	NaN	8.5, S
'11-Nov-2022 20:00:00'	49.08333333	1	19.4	NaN	20.96636222	29.87362444	NaN	7.841744702	2067.425224	1942.57046	681.571393	1.582991346	NaN	NaN	NaN	NaN	NaN	8.5, S
'11-Nov-2022 21:00:00'	49.125	1	19.54166667	NaN	20.95820748	29.87457507	NaN	7.841773868	2067.513306	1942.540948	680.8341112	1.583973562	NaN	NaN	NaN	NaN	NaN	8.5, S
'11-Nov-2022 22:00:00'	49.16666667	1	19.375	NaN	20.95171376	29.87551124	NaN	7.841803035	2067.601388	1942.511437	680.1419931	1.584977973	NaN	NaN	NaN	NaN	NaN	8.5, S
'11-Nov-2022 23:00:00'	49.20833333	1	19.48333333	NaN	20.9442883	29.87646964	NaN	7.841832202	2067.689471	1942.481925	679.4262134	1.585970006	NaN	NaN	NaN	NaN	NaN	8.5, S
'12-Nov-2022 00:00:00'	49.25	1	19.38333333	NaN	20.93872222	29.87734972	NaN	7.841861368	2067.777553	1942.452414	678.759699	1.586987699	NaN	NaN	NaN	NaN	NaN	8.5, S
'12-Nov-2022 01:00:00'	49.29166667	1	19.44166667	NaN	20.93190674	29.87825618	NaN	7.841890535	2067.865635	1942.422902	678.0611138	1.587988781	NaN	NaN	NaN	NaN	NaN	8.5, S
'12-Nov-2022 02:00:00'	49.33333333	1	19.425	NaN	20.92616778	29.87915278	NaN	7.841919702	2067.953717	1942.39339	677.3919538	1.589004326	NaN	NaN	NaN	NaN	NaN	8.5, S
'12-Nov-2022 03:00:00'	49.375	1	19.40833333	NaN	20.91963733	29.88006713	NaN	7.841948868	2068.041799	1942.363879	676.7028416	1.590009393	NaN	NaN	NaN	NaN	NaN	8.5, S
'12-Nov-2022 04:00:00'	49.41666667	1	19.46666667	NaN	20.91324972	29.88095646	NaN	7.841978035	2068.129881	1942.334367	676.0179814	1.591016843	NaN	NaN	NaN	NaN	NaN	8.5, S
'12-Nov-2022 05:00:00'	49.45833333	1	19.34166667	NaN	20.90728864	29.8818446	NaN	7.842007202	2068.217964	1942.304855	675.3453067	1.592030092	NaN	NaN	NaN	NaN	NaN	8.5, S
'12-Nov-2022 06:00:00'	49.5	1	19.475	NaN	20.90125444	29.88273	NaN	7.842036368	2068.306046	1942.275344	674.6714849	1.593042587	NaN	NaN	NaN	NaN	NaN	8.5, S
'12-Nov-2022 07:00:00'	49.54166667	1	19.33333333	NaN	20.89637127	29.88361127	NaN	7.842065535	2068.394128	1942.245832	674.0289917	1.594070463	NaN	NaN	NaN	NaN	NaN	8.5, S
'12-Nov-2022 08:00:00'	49.58333333	1	19.41666667	NaN	20.89052327	29.88448864	NaN	7.842094702	2068.48221	1942.21632	673.3616332	1.595085862	NaN	NaN	NaN	NaN	NaN	8.5, S
'12-Nov-2022 09:00:00'	49.625	1	19.34166667	NaN	20.88615111	29.88537361	NaN	7.842123868	2068.570292	1942.186809	672.7343435	1.596120769	NaN	NaN	NaN	NaN	NaN	8.5, S
'12-Nov-2022 10:00:00'	49.66666667	1	19.43333333	NaN	20.87992225	29.88630028	NaN	7.842153035	2068.658374	1942.157297	672.0593555	1.597130835	NaN	NaN	NaN	NaN	NaN	8.5, S
'12-Nov-2022 11:00:00'	49.70833333	1	19.43333333	NaN	20.87489667	29.88718722	NaN	7.842182202	2068.746456	1942.127785	671.4163808	1.598157456	NaN	NaN	NaN	NaN	NaN	8.5, S
'12-Nov-2022 12:00:00'	49.75	1	19.46666667	NaN	20.86889418	29.88809141	NaN	7.842211368	2068.834539	1942.098274	670.7486655	1.599171146	NaN	NaN	NaN	NaN	NaN	8.5, S
'12-Nov-2022 13:00:00'	49.79166667	1	19.45	NaN	20.86363174	29.88896882	NaN	7.842240535	2068.922621	1942.068762	670.1008801	1.600195119	NaN	NaN	NaN	NaN	NaN	8.5, S
'12-Nov-2022 14:00:00'	49.83333333	1	19.43333333	NaN	20.85707549	29.88989638	NaN	7.842015535	2069.010703	1942.03925	669.420595	1.601201532	NaN	NaN	NaN	NaN	NaN	8.5, S
'12-Nov-2022 15:00:00'	49.875	1	19.45833333	NaN	20.85204639	29.89079667	NaN	7.841790535	2069.098785	1942.009739	668.7809691	1.602228615	NaN	NaN	NaN	NaN	NaN	8.5, S
'12-Nov-2022 16:00:00'	49.91666667	1	19.44166667	NaN	20.84607275	29.89178371	NaN	7.841565535	2069.186867	1941.980227	668.1186968	1.603242242	NaN	NaN	NaN	NaN	NaN	8.5, S
'12-Nov-2022 17:00:00'	49.95833333	1	19.35833333	NaN	20.84060361	29.89279472	NaN	7.841340535	2069.274949	1941.950715	667.4709247	1.604262365	NaN	NaN	NaN	NaN	NaN	8.5, S
'12-Nov-2022 18:00:00'	50	1	20.3	NaN	20.83237521	29.89388217	NaN	7.841115535	2069.363031	1941.921204	666.7526825	1.60524522	NaN	NaN	NaN	NaN	NaN	8.5, S
'12-Nov-2022 19:00:00'	50.04166667	1	20.95833333	NaN	20.82436011	29.89497753	NaN	7.840890535	2069.451114	1941.891692	666.0411041	1.606230936	NaN	NaN	NaN	NaN	NaN	8.5, S
'12-Nov-2022 20:00:00'	50.08333333	1	21.18333333	NaN	20.815259	29.89608144	NaN	7.840665535	2069.539196	1941.86218	665.3020903	1.607202362	NaN	NaN	NaN	NaN	NaN	8.5, S
'12-Nov-2022 21:00:00'	50.125	1	21.40833333	NaN	20.80719443	29.89719638	NaN	7.840440535	2069.627278	1941.832669	664.5914013	1.608187466	NaN	NaN	NaN	NaN	NaN	8.5, S
'12-Nov-2022 22:00:00'	50.16666667	1	21.5	NaN	20.79873708	29.8983073	NaN	7.840215535	2069.71536	1941.803157	663.871277	1.609167596	NaN	NaN	NaN	NaN	NaN	8.5, S
'12-Nov-2022 23:00:00'	50.20833333	1	21.5	NaN	20.79701191	29.89926205	NaN	7.839990535	2069.803442	1941.773645	663.3256554	1.610238858	NaN	NaN	NaN	NaN	NaN	8.5, S
'13-Nov-2022 00:00:00'	50.25	1	21.5	NaN	20.81029806	29.89991611	NaN	7.839765535	2069.891524	1941.744134	663.1683212	1.611512667	NaN	NaN	NaN	NaN	NaN	8.5, S
'13-Nov-2022 01:00:00'	50.29166667	1	21.58333333	NaN	20.8254907	29.90055859	NaN	7.839540535	2069.979606	1941.714622	663.0609068	1.612812262	NaN	NaN	NaN	NaN	NaN	8.5, S
'13-Nov-2022 02:00:00'	50.33333333	1	21.5	NaN	20.842755	29.90122583	NaN	7.839315535	2070.067689	1941.68511	663.0083032	1.614139397	NaN	NaN	NaN	NaN	NaN	8.5, S
'13-Nov-2022 03:00:00'	50.375	1	21.5	NaN	20.86108255	29.90184958	NaN	7.839090535	2070.155771	1941.655599	662.9829891	1.615481724	NaN	NaN	NaN	NaN	NaN	8.5, S
'13-Nov-2022 04:00:00'	50.41666667	1	21.46666667	NaN	20.87901376	29.90251517	NaN	7.838865535	2070.243853	1941.626087	662.9482026	1.616818761	NaN	NaN	NaN	NaN	NaN	8.5, S
'13-Nov-2022 05:00:00'	50.45833333	1	21.43333333	NaN	20.89677688	29.90320557	NaN	7.838640535	2070.331935	1941.596575	662.9096324	1.618153753	NaN	NaN	NaN	NaN	NaN	8.5, S
'13-Nov-2022 06:00:00'	50.5	1	21.39166667	NaN	20.9142075	29.90394944	NaN	7.838415535	2070.420017	1941.567064	662.8634562	1.619484117	NaN	NaN	NaN	NaN	NaN	8.5, S
'13-Nov-2022 07:00:00'	50.54166667	1	21.375	NaN	20.92925702	29.90480056	NaN	7.838190535	2070.508099	1941.537552	662.7570209	1.620781855	NaN	NaN	NaN	NaN	NaN	8.5, S
'13-Nov-2022 08:00:00'	50.58333333	1	21.325	NaN	20.94148583	29.90571	NaN	7.837965535	2070.596182	1941.50804	662.5780657	1.622041706	NaN	NaN	NaN	NaN	NaN	8.5, S
'13-Nov-2022 09:00:00'	50.625	1	21.25833333	NaN	20.9520766	29.90669526	NaN	7.837740535	2070.684264	1941.478529	662.3578342	1.623279086	NaN	NaN	NaN	NaN	NaN	8.5, S
'13-Nov-2022 10:00:00'	50.66666667	1	21.225	NaN	20.9610493	29.9077409	NaN	7.837515535	2070.772346	1941.449017	662.0966344	1.624494424	NaN	NaN	NaN	NaN	NaN	8.5, S
'13-Nov-2022 11:00:00'	50.70833333	1	21.13333333	NaN	20.96925097	29.90877688	NaN	7.837290535	2070.860428	1941.419505	661.8154641	1.625699937	NaN	NaN	NaN	NaN	NaN	8.5, S
'13-Nov-2022 12:00:00'	50.75	1	21.21666667	NaN	20.9767625	29.90985306	NaN	7.837065535	2070.94851	1941.389994	661.5172818	1.626895994	NaN	NaN	NaN	NaN	NaN	8.5, S
'13-Nov-2022 13:00:00'	50.79166667	1	21.29166667	NaN	20.98327003	29.9109	NaN	7.836840535	2071.036592	1941.360482	661.1927787	1.628079349	NaN	NaN	NaN	NaN	NaN	8.5, S
'13-Nov-2022 14:00:00'	50.83333333	1	21.31818182	NaN	20.98818886	29.91205738	NaN	7.837244702	2071.124674	1941.33097	660.8290598	1.629240233	NaN	NaN	NaN	NaN	NaN	8.5, S
'13-Nov-2022 15:00:00'	50.875	1	21.23333333	NaN	20.99032944	29.91328056	NaN	7.837648868	2071.212757	1941.301459	660.3944654	1.630363333	NaN	NaN	NaN	NaN	NaN	8.5, S
'13-Nov-2022 16:00:00'	50.91666667	1	21.14166667	NaN	20.9906236	29.91453904	NaN	7.838053035	2071.300839	1941.271947	659.9128765	1.631461478	NaN	NaN	NaN	NaN	NaN	8.5, S
'13-Nov-2022 17:00:00'	50.95833333	1	21.16666667	NaN	20.99165346	29.91581801	NaN	7.838457202	2071.388921	1941.242435	659.4513085	1.63256937	NaN	NaN	NaN	NaN	NaN	8.5, S
'13-Nov-2022 18:00:00'	51	1	21.13333333	NaN	20.99368273	29.91706936	NaN	7.838861368	2071.477003	1941.212924	659.0157856	1.633691217	NaN	NaN	NaN	NaN	NaN	8.5, S
'13-Nov-2022 19:00:00'	51.04166667	1	21.04166667	NaN	20.99504706	29.91836218	NaN	7.839265535	2071.565085	1941.183412	658.5641571	1.634803799	NaN	NaN	NaN	NaN	NaN	8.5, S
'13-Nov-2022 20:00:00'	51.08333333	1	21	NaN	20.99428106	29.91974708	NaN	7.839669702	2071.653167	1941.1539	658.0592415	1.63588678	NaN	NaN	NaN	NaN	NaN	8.5, S
'13-Nov-2022 21:00:00'	51.125	1	21	NaN	20.99085817	29.9212446	NaN	7.840073868	2071.741249	1941.124389	657.4878299	1.636932789	NaN	NaN	NaN	NaN	NaN	8.5, S
'13-Nov-2022 22:00:00'	51.16666667	1	20.98333333	NaN	20.98494888	29.92282921	NaN	7.840478035	2071.829332	1941.094877	656.8540788	1.637944436	NaN	NaN	NaN	NaN	NaN	8.5, S
'13-Nov-2022 23:00:00'	51.20833333	1	20.925	NaN	20.97778078	29.9244688	NaN	7.840882202	2071.917414	1941.065365	656.1894126	1.638938594	NaN	NaN	NaN	NaN	NaN	8.5, S
'14-Nov-2022 00:00:00'	51.25	1	20.85454545	NaN	20.97024194	29.92612111	NaN	7.841286368	2072.005496	1941.035854	655.5161985	1.639927741	NaN	NaN	NaN	NaN	NaN	8.5, S
'14-Nov-2022 01:00:00'	51.29166667	1	20.85833333	NaN	20.9620409	29.92779188	NaN	7.841690535	2072.093578	1941.006342	654.8270214	1.64090789	NaN	NaN	NaN	NaN	NaN	8.5, S
'14-Nov-2022 02:00:00'	51.33333333	1	20.83333333	NaN	20.95331889	29.92950583	NaN	7.842094702	2072.18166	1940.97683	654.1259801	1.641880583	NaN	NaN	NaN	NaN	NaN	8.5, S
'14-Nov-2022 03:00:00'	51.375	1	20.69166667	NaN	20.94420669	29.93122758	NaN	7.842498868	2072.269742	1940.947319	653.4159038	1.642848067	NaN	NaN	NaN	NaN	NaN	8.5, S
'14-Nov-2022 04:00:00'	51.41666667	1	20.70833333	NaN	20.93469776	29.93295686	NaN	7.842903035	2072.357825	1940.917807	652.696648	1.643810255	NaN	NaN	NaN	NaN	NaN	8.5, S
'14-Nov-2022 05:00:00'	51.45833333	1	20.625	NaN	20.92470836	29.93472423	NaN	7.843307202	2072.445907	1940.888296	651.9665835	1.644765596	NaN	NaN	NaN	NaN	NaN	8.5, S
'14-Nov-2022 06:00:00'	51.5	1	20.7	NaN	20.91352944	29.93651028	NaN	7.843711368	2072.533989	1940.858784	651.2071902	1.645704859	NaN	NaN	NaN	NaN	NaN	8.5, S
'14-Nov-2022 07:00:00'	51.54166667	1	20.60833333	NaN	20.90146499	29.93829384	NaN	7.844115535	2072.622071	1940.829272	650.4260254	1.646632417	NaN	NaN	NaN	NaN	NaN	8.5, S
'14-Nov-2022 08:00:00'	51.58333333	1	20.65833333	NaN	20.88926917	29.94010444	NaN	7.844519702	2072.710153	1940.799761	649.6429978	1.647557957	NaN	NaN	NaN	NaN	NaN	8.5, S
'14-Nov-2022 09:00:00'	51.625	1	20.66666667	NaN	20.87678468	29.94189387	NaN	7.844923868	2072.798235	1940.770249	648.8532975	1.648480053	NaN	NaN	NaN	NaN	NaN	8.5, S
'14-Nov-2022 10:00:00'	51.66666667	1	NaN	NaN	20.86404085	29.94372451	NaN	7.845328035	2072.886317	1940.740737	648.0587127	1.649398216	NaN	NaN	NaN	NaN	NaN	8.5, S
'14-Nov-2022 11:00:00'	51.70833333	1	NaN	NaN	20.85059114	29.94554349	NaN	7.845732202	2072.9744	1940.711226	647.2469798	1.650307213	NaN	NaN	NaN	NaN	NaN	8.5, S
'14-Nov-2022 12:00:00'	51.75	1	NaN	NaN	20.83607493	29.94741198	NaN	7.846136368	2073.062482	1940.681714	646.4099347	1.651201351	NaN	NaN	NaN	NaN	NaN	8.5, S
'14-Nov-2022 13:00:00'	51.79166667	1	NaN	NaN	20.82192444	29.94926685	NaN	7.846540535	2073.150564	1940.652202	645.5831987	1.652100705	NaN	NaN	NaN	NaN	NaN	8.5, S
'14-Nov-2022 14:00:00'	51.83333333	1	NaN	NaN	20.80855028	29.9510875	NaN	7.846657202	2073.238646	1940.622691	644.7768742	1.653011065	NaN	NaN	NaN	NaN	NaN	8.5, S
'14-Nov-2022 15:00:00'	51.875	1	NaN	NaN	20.79867867	29.95287922	NaN	7.846773868	2073.326728	1940.593179	644.0604175	1.653968851	NaN	NaN	NaN	NaN	NaN	8.5, S
'14-Nov-2022 16:00:00'	51.91666667	1	NaN	NaN	20.79158901	29.95456	NaN	7.846890535	2073.41481	1940.563667	643.4138998	1.654965586	NaN	NaN	NaN	NaN	NaN	8.5, S
'14-Nov-2022 17:00:00'	51.95833333	1	NaN	NaN	20.7846275	29.95626139	NaN	7.847007202	2073.502892	1940.534156	642.7717814	1.655963872	NaN	NaN	NaN	NaN	NaN	8.5, S
'14-Nov-2022 18:00:00'	52	1	NaN	NaN	20.77608864	29.95805208	NaN	7.847123868	2073.590975	1940.504644	642.0918374	1.656939888	NaN	NaN	NaN	NaN	NaN	8.5, S
'14-Nov-2022 19:00:00'	52.04166667	1	NaN	NaN	20.76829045	29.95977331	NaN	7.847240535	2073.679057	1940.475132	641.4304408	1.657926937	NaN	NaN	NaN	NaN	NaN	8.5, S
'14-Nov-2022 20:00:00'	52.08333333	1	NaN	NaN	20.75638774	29.96161643	NaN	7.847357202	2073.767139	1940.445621	640.6677833	1.658857393	NaN	NaN	NaN	NaN	NaN	8.5, S
'14-Nov-2022 21:00:00'	52.125	1	NaN	NaN	20.74630083	29.963385	NaN	7.847473868	2073.855221	1940.416109	639.9509484	1.659813352	NaN	NaN	NaN	NaN	NaN	8.5, S
'14-Nov-2022 22:00:00'	52.16666667	1	NaN	NaN	20.73541765	29.96518347	NaN	7.847590535	2073.943303	1940.386597	639.2153919	1.660758338	NaN	NaN	NaN	NaN	NaN	8.5, S
'14-Nov-2022 23:00:00'	52.20833333	1	NaN	NaN	20.7243961	29.96699331	NaN	7.847707202	2074.031385	1940.357086	638.4775031	1.661701427	NaN	NaN	NaN	NaN	NaN	8.5, S
'15-Nov-2022 00:00:00'	52.25	1	NaN	NaN	20.71285861	29.96884556	NaN	7.847823868	2074.119467	1940.327574	637.7282554	1.662637117	NaN	NaN	NaN	NaN	NaN	8.5, S
'15-Nov-2022 01:00:00'	52.29166667	1	NaN	NaN	20.70098704	29.97070873	NaN	7.847940535	2074.20755	1940.298062	636.9717684	1.663568293	NaN	NaN	NaN	NaN	NaN	8.5, S
'15-Nov-2022 02:00:00'	52.33333333	1	NaN	NaN	20.68731939	29.97259584	NaN	7.848057202	2074.295632	1940.268551	636.1714418	1.664475192	NaN	NaN	NaN	NaN	NaN	8.5, S
'15-Nov-2022 03:00:00'	52.375	1	NaN	NaN	20.67244819	29.97450808	NaN	7.848173868	2074.383714	1940.239039	635.3423529	1.665365736	NaN	NaN	NaN	NaN	NaN	8.5, S
'15-Nov-2022 04:00:00'	52.41666667	1	NaN	NaN	20.65668736	29.97641573	NaN	7.848290535	2074.471796	1940.209527	634.4920189	1.666244559	NaN	NaN	NaN	NaN	NaN	8.5, S
'15-Nov-2022 05:00:00'	52.45833333	1	NaN	NaN	20.64098528	29.97836444	NaN	7.848407202	2074.559878	1940.180016	633.645054	1.667123706	NaN	NaN	NaN	NaN	NaN	8.5, S
'15-Nov-2022 06:00:00'	52.5	1	NaN	NaN	20.62609612	29.98025568	NaN	7.848523868	2074.64796	1940.150504	632.8187896	1.668014683	NaN	NaN	NaN	NaN	NaN	8.5, S
'15-Nov-2022 07:00:00'	52.54166667	1	NaN	NaN	20.61221746	29.9821169	NaN	7.848640535	2074.736043	1940.120992	632.0185426	1.668919737	NaN	NaN	NaN	NaN	NaN	8.5, S
'15-Nov-2022 08:00:00'	52.58333333	1	NaN	NaN	20.59875917	29.98402333	NaN	7.848757202	2074.824125	1940.091481	631.2306588	1.669829883	NaN	NaN	NaN	NaN	NaN	8.5, S
'15-Nov-2022 09:00:00'	52.625	1	NaN	NaN	20.5860687	29.9858374	NaN	7.848873868	2074.912207	1940.061969	630.4615972	1.670751751	NaN	NaN	NaN	NaN	NaN	8.5, S
'15-Nov-2022 10:00:00'	52.66666667	1	NaN	NaN	20.57334916	29.98762022	NaN	7.848990535	2075.000289	1940.032457	629.6923734	1.6716738	NaN	NaN	NaN	NaN	NaN	8.5, S
'15-Nov-2022 11:00:00'	52.70833333	1	NaN	NaN	20.56044095	29.98945265	NaN	7.849107202	2075.088371	1940.002946	628.9202913	1.672592726	NaN	NaN	NaN	NaN	NaN	8.5, S
'15-Nov-2022 12:00:00'	52.75	1	NaN	NaN	20.54745639	29.99122639	NaN	7.849223868	2075.176453	1939.973434	628.1464449	1.673511596	NaN	NaN	NaN	NaN	NaN	8.5, S
'15-Nov-2022 13:00:00'	52.79166667	1	NaN	NaN	20.53459608	29.99298599	NaN	7.849340535	2075.264535	1939.943922	627.3765384	1.674432452	NaN	NaN	NaN	NaN	NaN	8.5, S
'15-Nov-2022 14:00:00'	52.83333333	1	NaN	NaN	20.52388106	29.99469109	NaN	7.849553035	2075.352618	1939.914411	626.6601628	1.675382906	NaN	NaN	NaN	NaN	NaN	8.5, S
'15-Nov-2022 15:00:00'	52.875	1	NaN	NaN	20.51476833	29.99635278	NaN	7.849765535	2075.4407	1939.884899	625.9838462	1.676355534	NaN	NaN	NaN	NaN	NaN	8.5, S
'15-Nov-2022 16:00:00'	52.91666667	1	NaN	NaN	20.50722022	29.99796826	NaN	7.849978035	2075.528782	1939.855387	625.3464947	1.67734988	NaN	NaN	NaN	NaN	NaN	8.5, S
'15-Nov-2022 17:00:00'	52.95833333	1	NaN	NaN	20.49819668	29.99959889	NaN	7.850190535	2075.616864	1939.825876	624.6736066	1.678324391	NaN	NaN	NaN	NaN	NaN	8.5, S
'15-Nov-2022 18:00:00'	53	1	NaN	NaN	20.49084708	30.00119805	NaN	7.850403035	2075.704946	1939.796364	624.0425462	1.679321872	NaN	NaN	NaN	NaN	NaN	8.5, S
'15-Nov-2022 19:00:00'	53.04166667	1	NaN	NaN	20.47679803	30.00287247	NaN	7.850615535	2075.793028	1939.766852	623.2477064	1.680228759	NaN	NaN	NaN	NaN	2083.995142	8.5, S
'15-Nov-2022 20:00:00'	53.08333333	1	NaN	NaN	20.46652389	30.00451972	NaN	7.850828035	2075.88111	1939.737341	622.5468484	1.681186654	NaN	NaN	2075.88111	1939.737341	NaN	8.5, S
'15-Nov-2022 21:00:00'	53.125	1	NaN	NaN	20.46108781	30.0060349	NaN	7.851040535	2075.891955	1939.709094	622.2702959	1.681455799	NaN	NaN	NaN	NaN	NaN	8.5, S
'15-Nov-2022 22:00:00'	53.16666667	1	NaN	NaN	20.45694113	30.00750366	NaN	7.851253035	2075.9028	1939.680848	622.024989	1.681742872	NaN	NaN	NaN	NaN	NaN	8.5, S
'15-Nov-2022 23:00:00'	53.20833333	1	NaN	NaN	20.45363778	30.00899278	NaN	7.851465535	2075.913645	1939.652602	621.8009321	1.682040932	NaN	NaN	NaN	NaN	NaN	8.5, S
'16-Nov-2022 00:00:00'	53.25	1	NaN	NaN	20.45152936	30.01045623	NaN	7.851678035	2075.92449	1939.624355	621.6060593	1.682355352	NaN	NaN	NaN	NaN	NaN	8.5, S
'16-Nov-2022 01:00:00'	53.29166667	1	NaN	NaN	20.45092472	30.0118309	NaN	7.851890535	2075.935335	1939.596109	621.446975	1.682691185	NaN	NaN	NaN	NaN	NaN	8.5, S
'16-Nov-2022 02:00:00'	53.33333333	1	NaN	NaN	20.45012535	30.01322758	NaN	7.852103035	2075.94618	1939.567862	621.2834924	1.683024099	NaN	NaN	NaN	NaN	NaN	8.5, S
'16-Nov-2022 03:00:00'	53.375	1	NaN	NaN	20.44713694	30.01465833	NaN	7.852315535	2075.957025	1939.539616	621.0666212	1.68332724	NaN	NaN	NaN	NaN	NaN	8.5, S
'16-Nov-2022 04:00:00'	53.41666667	1	NaN	NaN	20.44353725	30.01607199	NaN	7.852528035	2075.96787	1939.51137	620.8345033	1.683622459	NaN	NaN	NaN	NaN	NaN	8.5, S
'16-Nov-2022 05:00:00'	53.45833333	1	NaN	NaN	20.4405585	30.0174649	NaN	7.852740535	2075.978715	1939.483123	620.6174642	1.683926291	NaN	NaN	NaN	NaN	NaN	8.5, S
'16-Nov-2022 06:00:00'	53.5	1	NaN	NaN	20.43841667	30.01885417	NaN	7.852953035	2075.98956	1939.454877	620.4210797	1.684241376	NaN	NaN	NaN	NaN	NaN	8.5, S
'16-Nov-2022 07:00:00'	53.54166667	1	NaN	NaN	20.4374618	30.02015084	NaN	7.853165535	2076.000405	1939.426631	620.2525593	1.684573697	NaN	NaN	NaN	NaN	NaN	8.5, S
'16-Nov-2022 08:00:00'	53.58333333	1	NaN	NaN	20.43859307	30.02141385	NaN	7.853378035	2076.01125	1939.398384	620.1349501	1.684934426	NaN	NaN	NaN	NaN	NaN	8.5, S
'16-Nov-2022 09:00:00'	53.625	1	NaN	NaN	20.44181755	30.02255822	NaN	7.853590535	2076.022094	1939.370138	620.0670662	1.685324913	NaN	NaN	NaN	NaN	NaN	8.5, S
'16-Nov-2022 10:00:00'	53.66666667	1	NaN	NaN	20.44708567	30.02367219	NaN	7.853803035	2076.032939	1939.341892	620.0490539	1.685743221	NaN	NaN	NaN	NaN	NaN	8.5, S
'16-Nov-2022 11:00:00'	53.70833333	1	NaN	NaN	20.45331468	30.0247133	NaN	7.854015535	2076.043784	1939.313645	620.0535787	1.686175499	NaN	NaN	NaN	NaN	NaN	8.5, S
'16-Nov-2022 12:00:00'	53.75	1	NaN	NaN	20.45654429	30.02589304	NaN	7.854228035	2076.054629	1939.285399	619.9864454	1.686565622	NaN	NaN	NaN	NaN	NaN	8.5, S
'16-Nov-2022 13:00:00'	53.79166667	1	NaN	NaN	20.45785562	30.02709157	NaN	7.854440535	2076.065474	1939.257152	619.8724124	1.686929799	NaN	NaN	NaN	NaN	NaN	8.5, S
'16-Nov-2022 14:00:00'	53.83333333	1	NaN	NaN	20.45914972	30.02825861	NaN	7.854540535	2076.076319	1939.228906	619.7575031	1.687294222	NaN	NaN	NaN	NaN	NaN	8.5, S
'16-Nov-2022 15:00:00'	53.875	1	NaN	NaN	20.45844543	30.0295349	NaN	7.854640535	2076.087164	1939.20066	619.5951734	1.687630285	NaN	NaN	NaN	NaN	NaN	8.5, S
'16-Nov-2022 16:00:00'	53.91666667	1	NaN	NaN	20.45712366	30.03081352	NaN	7.854740535	2076.098009	1939.172413	619.4177519	1.68795805	NaN	NaN	NaN	NaN	NaN	8.5, S
'16-Nov-2022 17:00:00'	53.95833333	1	NaN	NaN	20.45638361	30.03207083	NaN	7.854840535	2076.108854	1939.144167	619.2543719	1.688293928	NaN	NaN	NaN	NaN	NaN	8.5, S
'16-Nov-2022 18:00:00'	54	1	NaN	NaN	20.45664848	30.03331967	NaN	7.854940535	2076.119699	1939.115921	619.1156297	1.688643403	NaN	NaN	NaN	NaN	NaN	8.5, S
'16-Nov-2022 19:00:00'	54.04166667	1	NaN	NaN	20.45626592	30.03462225	NaN	7.855040535	2076.130544	1939.087674	618.9618641	1.688983423	NaN	NaN	NaN	NaN	NaN	8.5, S
'16-Nov-2022 20:00:00'	54.08333333	1	NaN	NaN	20.45619387	30.0359273	NaN	7.855140535	2076.141389	1939.059428	618.815826	1.689327577	NaN	NaN	NaN	NaN	NaN	8.5, S
'16-Nov-2022 21:00:00'	54.125	1	NaN	NaN	20.45558778	30.03732278	NaN	7.855240535	2076.152233	1939.031181	618.6581344	1.689663253	NaN	NaN	NaN	NaN	NaN	8.5, S
'16-Nov-2022 22:00:00'	54.16666667	1	NaN	NaN	20.45387227	30.03872297	NaN	7.855340535	2076.163078	1939.002935	618.4733227	1.689983997	NaN	NaN	NaN	NaN	NaN	8.5, S
'16-Nov-2022 23:00:00'	54.20833333	1	NaN	NaN	20.45172145	30.04018747	NaN	7.855440535	2076.173923	1938.974689	618.2788994	1.690297965	NaN	NaN	NaN	NaN	NaN	8.5, S
'17-Nov-2022 00:00:00'	54.25	1	NaN	NaN	20.44924583	30.04167583	NaN	7.855540535	2076.184768	1938.946442	618.0769538	1.690607233	NaN	NaN	NaN	NaN	NaN	8.5, S
'17-Nov-2022 01:00:00'	54.29166667	1	NaN	NaN	20.44643708	30.04314635	NaN	7.855640535	2076.195613	1938.918196	617.8666356	1.690912302	NaN	NaN	NaN	NaN	NaN	8.5, S
'17-Nov-2022 02:00:00'	54.33333333	1	NaN	NaN	20.44321302	30.04469003	NaN	7.855740535	2076.206458	1938.88995	617.6473588	1.691210732	NaN	NaN	NaN	NaN	NaN	8.5, S
'17-Nov-2022 03:00:00'	54.375	1	NaN	NaN	20.43944624	30.0462688	NaN	7.855840535	2076.217303	1938.861703	617.4154123	1.691501374	NaN	NaN	NaN	NaN	NaN	8.5, S
'17-Nov-2022 04:00:00'	54.41666667	1	NaN	NaN	20.43505112	30.04783989	NaN	7.855940535	2076.228148	1938.833457	617.1680415	1.691783712	NaN	NaN	NaN	NaN	NaN	8.5, S
'17-Nov-2022 05:00:00'	54.45833333	1	NaN	NaN	20.42989333	30.04944278	NaN	7.856040535	2076.238993	1938.80521	616.9025872	1.692055366	NaN	NaN	NaN	NaN	NaN	8.5, S
'17-Nov-2022 06:00:00'	54.5	1	NaN	NaN	20.42360083	30.05108947	NaN	7.856140535	2076.249838	1938.776964	616.6101429	1.692311174	NaN	NaN	NaN	NaN	NaN	8.5, S
'17-Nov-2022 07:00:00'	54.54166667	1	NaN	NaN	20.41651944	30.05276479	NaN	7.856240535	2076.260683	1938.748718	616.2989739	1.692556	NaN	NaN	NaN	NaN	NaN	8.5, S
'17-Nov-2022 08:00:00'	54.58333333	1	NaN	NaN	20.40896806	30.05443444	92.46048717	7.856340535	2076.271528	1938.720471	615.9763767	1.692794624	NaN	NaN	NaN	NaN	NaN	8.5, S
'17-Nov-2022 09:00:00'	54.625	1	NaN	NaN	20.40199417	30.05608972	92.44167733	7.856440535	2076.282373	1938.692225	615.667858	1.693041208	NaN	NaN	NaN	NaN	NaN	8.5, S
'17-Nov-2022 10:00:00'	54.66666667	1	NaN	NaN	20.39482745	30.05777367	92.21855333	7.856540535	2076.293217	1938.663979	615.3552319	1.693284797	NaN	NaN	NaN	NaN	NaN	8.5, S
'17-Nov-2022 11:00:00'	54.70833333	1	NaN	NaN	20.38748329	30.0594688	92.080523	7.856640535	2076.304062	1938.635732	615.0386075	1.693525856	NaN	NaN	NaN	NaN	NaN	8.5, S
'17-Nov-2022 12:00:00'	54.75	1	NaN	NaN	20.38026056	30.06115361	92.27315233	7.856740535	2076.314907	1938.607486	614.7249582	1.693768705	NaN	NaN	NaN	NaN	NaN	8.5, S
'17-Nov-2022 13:00:00'	54.79166667	1	NaN	NaN	20.37203137	30.06284734	92.14606233	7.856840535	2076.325752	1938.579239	614.3870348	1.693997962	NaN	NaN	NaN	NaN	NaN	8.5, S
'17-Nov-2022 14:00:00'	54.83333333	1	NaN	NaN	20.36557493	30.0644922	92.03857583	7.856940535	2076.336597	1938.550993	614.091813	1.69425168	NaN	NaN	NaN	NaN	NaN	8.5, S
'17-Nov-2022 15:00:00'	54.875	1	NaN	NaN	20.36354417	30.06601028	92.199899	7.857040535	2076.347442	1938.522747	613.9027666	1.694566504	NaN	NaN	NaN	NaN	NaN	8.5, S
'17-Nov-2022 16:00:00'	54.91666667	1	NaN	NaN	20.3627264	30.06747584	92.31544917	7.857140535	2076.358287	1938.4945	613.7425738	1.694898343	NaN	NaN	NaN	NaN	NaN	8.5, S
'17-Nov-2022 17:00:00'	54.95833333	1	NaN	NaN	20.35979114	30.06906842	92.098454	7.857240535	2076.369132	1938.466254	613.5327664	1.695199968	NaN	NaN	NaN	NaN	NaN	8.5, S
'17-Nov-2022 18:00:00'	55	1	NaN	NaN	20.35592925	30.07067521	92.11823117	7.857340535	2076.379977	1938.438008	613.300674	1.695488984	NaN	NaN	NaN	NaN	NaN	8.5, S
'17-Nov-2022 19:00:00'	55.04166667	1	NaN	NaN	20.3524059	30.07227753	92.4912195	7.857440535	2076.390822	1938.409761	613.0768661	1.6957826	NaN	NaN	NaN	NaN	NaN	8.5, S
'17-Nov-2022 20:00:00'	55.08333333	1	NaN	NaN	20.348465	30.07391806	92.07646167	7.857540535	2076.401667	1938.381515	612.8435739	1.696070066	NaN	NaN	NaN	NaN	NaN	8.5, S
'17-Nov-2022 21:00:00'	55.125	1	NaN	NaN	20.34376316	30.07559446	92.17963233	7.857640535	2076.412512	1938.353268	612.5924068	1.696346822	NaN	NaN	NaN	NaN	NaN	8.5, S
'17-Nov-2022 22:00:00'	55.16666667	1	NaN	NaN	20.33878732	30.07727634	92.50865433	7.857740535	2076.423357	1938.325022	612.3347692	1.696619834	NaN	NaN	NaN	NaN	NaN	8.5, S
'17-Nov-2022 23:00:00'	55.20833333	1	NaN	NaN	20.33379194	30.07894806	92.16092167	7.857840535	2076.434201	1938.296776	612.0766188	1.696892739	NaN	NaN	NaN	NaN	NaN	8.5, S
'18-Nov-2022 00:00:00'	55.25	1	NaN	NaN	20.32906417	30.080635	92.12437633	7.857940535	2076.445046	1938.268529	611.825336	1.697169003	NaN	NaN	NaN	NaN	NaN	8.5, S
'18-Nov-2022 01:00:00'	55.29166667	1	NaN	NaN	20.32426218	30.08231064	92.34280017	7.858040535	2076.455891	1938.240283	611.5721893	1.697444446	NaN	NaN	NaN	NaN	NaN	8.5, S
'18-Nov-2022 02:00:00'	55.33333333	1	NaN	NaN	20.31933788	30.08395237	92.60150233	7.858140535	2076.466736	1938.212037	611.3156605	1.697718759	NaN	NaN	NaN	NaN	NaN	8.5, S
'18-Nov-2022 03:00:00'	55.375	1	NaN	NaN	20.31368222	30.08564917	92.10381183	7.858240535	2076.477581	1938.18379	611.0423303	1.697982478	NaN	NaN	NaN	NaN	NaN	8.5, S
'18-Nov-2022 04:00:00'	55.41666667	1	NaN	NaN	20.3073368	30.08737135	91.98611467	7.858340535	2076.488426	1938.155544	610.7527696	1.698236602	NaN	NaN	NaN	NaN	NaN	8.5, S
'18-Nov-2022 05:00:00'	55.45833333	1	NaN	NaN	20.30027111	30.08913111	92.507762	7.858440535	2076.499271	1938.127297	610.446447	1.698480546	NaN	NaN	NaN	NaN	NaN	8.5, S
'18-Nov-2022 06:00:00'	55.5	1	NaN	NaN	20.29322333	30.09086306	92.02721783	7.858540535	2076.510116	1938.099051	610.1402893	1.698725151	NaN	NaN	NaN	NaN	NaN	8.5, S
'18-Nov-2022 07:00:00'	55.54166667	1	NaN	NaN	20.28603708	30.09262837	92.1600925	7.858640535	2076.520961	1938.070805	609.8314484	1.69896742	NaN	NaN	NaN	NaN	NaN	8.5, S
'18-Nov-2022 08:00:00'	55.58333333	1	NaN	NaN	20.27895152	30.09436371	92.04045533	7.858740535	2076.531806	1938.042558	609.5247489	1.69921149	NaN	NaN	NaN	NaN	NaN	8.5, S
'18-Nov-2022 09:00:00'	55.625	1	NaN	NaN	20.27236184	30.09608022	92.26142383	7.858840535	2076.542651	1938.014312	609.2299389	1.699462477	NaN	NaN	NaN	NaN	NaN	8.5, S
'18-Nov-2022 10:00:00'	55.66666667	1	NaN	NaN	20.26589466	30.09778961	92.1590925	7.858940535	2076.553496	1937.986066	608.9381378	1.699715215	NaN	NaN	NaN	NaN	NaN	8.5, S
'18-Nov-2022 11:00:00'	55.70833333	1	NaN	NaN	20.25946056	30.09947222	92.05552583	7.859040535	2076.564341	1937.957819	608.6468725	1.6999688	NaN	NaN	NaN	NaN	NaN	8.5, S
'18-Nov-2022 12:00:00'	55.75	1	NaN	NaN	20.25126233	30.10117895	92.279264	7.859140535	2076.575185	1937.929573	608.3134218	1.700198469	NaN	NaN	NaN	NaN	NaN	8.5, S
'18-Nov-2022 13:00:00'	55.79166667	1	NaN	NaN	20.24161042	30.10288507	92.243233	7.859240535	2076.58603	1937.901326	607.9449764	1.700408749	NaN	NaN	NaN	NaN	NaN	8.5, S
'18-Nov-2022 14:00:00'	55.83333333	1	NaN	NaN	20.23282694	30.10460556	92.1131275	7.859365535	2076.596875	1937.87308	607.5979735	1.700630434	NaN	NaN	NaN	NaN	NaN	8.5, S
'18-Nov-2022 15:00:00'	55.875	1	NaN	NaN	20.22633889	30.10630444	92.02309383	7.859490535	2076.60772	1937.844834	607.3063196	1.700883102	NaN	NaN	NaN	NaN	NaN	8.5, S
'18-Nov-2022 16:00:00'	55.91666667	1	NaN	NaN	20.2232605	30.1079577	91.9569445	7.859615535	2076.618565	1937.816587	607.096499	1.701181973	NaN	NaN	NaN	NaN	NaN	8.5, S
'18-Nov-2022 17:00:00'	55.95833333	1	NaN	NaN	20.21924095	30.10963816	92.04590333	7.859740535	2076.62941	1937.788341	606.86445	1.701467877	NaN	NaN	NaN	NaN	NaN	8.5, S
'18-Nov-2022 18:00:00'	56	1	NaN	NaN	20.213835	30.11132167	92.0051825	7.859865535	2076.640255	1937.760095	606.5990732	1.701735232	NaN	NaN	NaN	NaN	NaN	8.5, S
'18-Nov-2022 19:00:00'	56.04166667	1	NaN	NaN	20.20889073	30.11300337	92.26147167	7.859990535	2076.6511	1937.731848	606.3449394	1.702008781	NaN	NaN	NaN	NaN	NaN	8.5, S
'18-Nov-2022 20:00:00'	56.08333333	1	NaN	NaN	20.2048	30.11471278	91.98615667	7.860115535	2076.661945	1937.703602	606.1119453	1.702293313	NaN	NaN	NaN	NaN	NaN	8.5, S
'18-Nov-2022 21:00:00'	56.125	1	NaN	NaN	20.20071028	30.11645028	92.09150783	7.860240535	2076.67279	1937.675355	605.8795109	1.702577443	NaN	NaN	NaN	NaN	NaN	8.5, S
'18-Nov-2022 22:00:00'	56.16666667	1	NaN	NaN	20.19653596	30.11818764	92.24216967	7.860365535	2076.683635	1937.647109	605.6451375	1.702860449	NaN	NaN	NaN	NaN	NaN	8.5, S
'18-Nov-2022 23:00:00'	56.20833333	1	NaN	NaN	20.19208283	30.11989474	92.574626	7.860490535	2076.69448	1937.618863	605.4036831	1.703140186	NaN	NaN	NaN	NaN	NaN	8.5, S
'19-Nov-2022 00:00:00'	56.25	1	NaN	NaN	20.18786379	30.12165181	93.06347383	7.860615535	2076.705325	1937.590616	605.1687464	1.703422306	NaN	NaN	NaN	NaN	NaN	8.5, S
'19-Nov-2022 01:00:00'	56.29166667	1	NaN	NaN	20.18378062	30.12334551	92.43580967	7.860740535	2076.716169	1937.56237	604.9362143	1.703707185	NaN	NaN	NaN	NaN	NaN	8.5, S
'19-Nov-2022 02:00:00'	56.33333333	1	NaN	NaN	20.180355	30.12505667	92.2934775	7.860865535	2076.727014	1937.534124	604.7198871	1.704000579	NaN	NaN	NaN	NaN	NaN	8.5, S
'19-Nov-2022 03:00:00'	56.375	1	NaN	NaN	20.17801884	30.1266687	92.12584367	7.860990535	2076.737859	1937.505877	604.5283574	1.70430999	NaN	NaN	NaN	NaN	NaN	8.5, S
'19-Nov-2022 04:00:00'	56.41666667	1	NaN	NaN	20.1750404	30.12828333	92.07550317	7.861115535	2076.748704	1937.477631	604.3214881	1.704610793	NaN	NaN	NaN	NaN	NaN	8.5, S
'19-Nov-2022 05:00:00'	56.45833333	1	NaN	NaN	20.17160333	30.12992167	93.98565483	7.861240535	2076.759549	1937.449384	604.1040352	1.704905127	NaN	NaN	NaN	NaN	NaN	8.5, S
'19-Nov-2022 06:00:00'	56.5	1	NaN	NaN	20.16752972	30.13158472	92.24740367	7.861365535	2076.770394	1937.421138	603.8717457	1.705190601	NaN	NaN	NaN	NaN	NaN	8.5, S
'19-Nov-2022 07:00:00'	56.54166667	1	NaN	NaN	20.16205112	30.13329579	92.28723933	7.861490535	2076.781239	1937.392892	603.6065181	1.705456617	NaN	NaN	NaN	NaN	NaN	8.5, S
'19-Nov-2022 08:00:00'	56.58333333	1	NaN	NaN	20.15569889	30.13505	92.3381755	7.861615535	2076.792084	1937.364645	603.3210848	1.705710341	NaN	NaN	NaN	NaN	NaN	8.5, S
'19-Nov-2022 09:00:00'	56.625	1	NaN	NaN	20.14860611	30.13683778	92.190493	7.861740535	2076.802929	1937.336399	603.0185214	1.705953695	NaN	NaN	NaN	NaN	NaN	8.5, S
'19-Nov-2022 10:00:00'	56.66666667	1	NaN	NaN	20.14082213	30.13860364	92.30242433	7.861865535	2076.813774	1937.308153	602.6991862	1.706188169	NaN	NaN	NaN	NaN	NaN	8.5, S
'19-Nov-2022 11:00:00'	56.70833333	1	NaN	NaN	20.13240641	30.14043064	92.2143845	7.861990535	2076.824619	1937.279906	602.3658	1.70641332	NaN	NaN	NaN	NaN	NaN	8.5, S
'19-Nov-2022 12:00:00'	56.75	1	NaN	NaN	20.12492028	30.14225528	92.27687067	7.862115535	2076.835464	1937.25166	602.0548616	1.706650912	NaN	NaN	NaN	NaN	NaN	8.5, S
'19-Nov-2022 13:00:00'	56.79166667	1	NaN	NaN	20.11852584	30.14396067	92.29837633	7.862240535	2076.846308	1937.223413	601.7684407	1.706904848	NaN	NaN	NaN	NaN	NaN	8.5, S
'19-Nov-2022 14:00:00'	56.83333333	1	NaN	NaN	20.11259944	30.14563639	92.40713967	7.862365535	2076.857153	1937.195167	601.492928	1.707165472	NaN	NaN	NaN	NaN	NaN	8.5, S
'19-Nov-2022 15:00:00'	56.875	1	NaN	NaN	20.10882528	30.14734	92.70537667	7.862490535	2076.867998	1937.166921	601.2695386	1.707454365	NaN	NaN	NaN	NaN	NaN	8.5, S
'19-Nov-2022 16:00:00'	56.91666667	1	NaN	NaN	20.10810506	30.14897303	92.398561	7.862615535	2076.878843	1937.138674	601.118315	1.707785012	NaN	NaN	NaN	NaN	NaN	8.5, S
'19-Nov-2022 17:00:00'	56.95833333	1	NaN	NaN	20.10820416	30.15058421	92.3725495	7.862740535	2076.889688	1937.110428	600.9864349	1.708126908	NaN	NaN	NaN	NaN	NaN	8.5, S
'19-Nov-2022 18:00:00'	57	1	NaN	NaN	20.10721811	30.15225125	92.43714283	7.862865535	2076.900533	1937.082182	600.8294747	1.708453511	NaN	NaN	NaN	NaN	NaN	8.5, S
'19-Nov-2022 19:00:00'	57.04166667	1	NaN	NaN	20.1057	30.15392817	92.62450917	7.862990535	2076.911378	1937.053935	600.6599892	1.708772876	NaN	NaN	NaN	NaN	NaN	8.5, S
'19-Nov-2022 20:00:00'	57.08333333	1	NaN	NaN	20.10272917	30.15566667	92.53027283	7.863115535	2076.922223	1937.025689	600.4567465	1.709071957	NaN	NaN	NaN	NaN	NaN	8.5, S
'19-Nov-2022 21:00:00'	57.125	1	NaN	NaN	20.09844	30.15743833	92.30709017	7.863240535	2076.933068	1936.997442	600.2225589	1.70935297	NaN	NaN	NaN	NaN	NaN	8.5, S
'19-Nov-2022 22:00:00'	57.16666667	1	NaN	NaN	20.09341096	30.15921826	92.4396605	7.863365535	2076.943913	1936.969196	599.9709104	1.709624002	NaN	NaN	NaN	NaN	NaN	8.5, S
'19-Nov-2022 23:00:00'	57.20833333	1	NaN	NaN	20.0883275	30.16100833	92.46782683	7.863490535	2076.954758	1936.94095	599.7182335	1.709894159	NaN	NaN	NaN	NaN	NaN	8.5, S
'20-Nov-2022 00:00:00'	57.25	1	NaN	NaN	20.08338889	30.16278194	92.5587455	7.863615535	2076.965603	1936.912703	599.4688849	1.710166496	NaN	NaN	NaN	NaN	NaN	8.5, S
'20-Nov-2022 01:00:00'	57.29166667	1	NaN	NaN	20.07816798	30.16451966	92.38059133	7.863740535	2076.976448	1936.884457	599.2123628	1.710435614	NaN	NaN	NaN	NaN	NaN	8.5, S
'20-Nov-2022 02:00:00'	57.33333333	1	NaN	NaN	20.07287333	30.16631583	92.40759167	7.863865535	2076.987292	1936.856211	598.9550913	1.710702876	NaN	NaN	NaN	NaN	NaN	8.5, S
'20-Nov-2022 03:00:00'	57.375	1	NaN	NaN	20.06702806	30.16806028	92.41097883	7.863990535	2076.998137	1936.827964	598.6840131	1.710963584	NaN	NaN	NaN	NaN	NaN	8.5, S
'20-Nov-2022 04:00:00'	57.41666667	1	NaN	NaN	20.06143249	30.16979888	92.51314217	7.864115535	2077.008982	1936.799718	598.4189359	1.71122771	NaN	NaN	NaN	NaN	NaN	8.5, S
'20-Nov-2022 05:00:00'	57.45833333	1	NaN	NaN	20.05640891	30.17150223	92.8524365	7.864240535	2077.019827	1936.771471	598.1670907	1.711499989	NaN	NaN	NaN	NaN	NaN	8.5, S
'20-Nov-2022 06:00:00'	57.5	1	NaN	NaN	20.051105	30.17320028	92.85350817	7.864365535	2077.030672	1936.743225	597.9086	1.711768618	NaN	NaN	NaN	NaN	NaN	8.5, S
'20-Nov-2022 07:00:00'	57.54166667	1	NaN	NaN	20.04602303	30.17493315	92.80219133	7.864490535	2077.041517	1936.714979	597.6560499	1.712039684	NaN	NaN	NaN	NaN	NaN	8.5, S
'20-Nov-2022 08:00:00'	57.58333333	1	NaN	NaN	20.04008199	30.17666842	92.39019683	7.864615535	2077.052362	1936.686732	597.3831917	1.712299278	NaN	NaN	NaN	NaN	NaN	8.5, S
'20-Nov-2022 09:00:00'	57.625	1	NaN	NaN	20.03214318	30.17845515	92.46962483	7.864740535	2077.063207	1936.658486	597.0636832	1.71253151	NaN	NaN	NaN	NaN	NaN	8.5, S
'20-Nov-2022 10:00:00'	57.66666667	1	NaN	NaN	20.02257275	30.18031938	92.39201833	7.864865535	2077.074052	1936.63024	596.706699	1.712740873	NaN	NaN	NaN	NaN	NaN	8.5, S
'20-Nov-2022 11:00:00'	57.70833333	1	NaN	NaN	20.0118425	30.18221389	92.342117	7.864990535	2077.084897	1936.601993	596.3228019	1.712934371	NaN	NaN	NaN	NaN	NaN	8.5, S
'20-Nov-2022 12:00:00'	57.75	1	NaN	NaN	20.00053972	30.18413694	92.72712517	7.865115535	2077.095742	1936.573747	595.9259706	1.713119854	NaN	NaN	NaN	NaN	NaN	8.5, S
'20-Nov-2022 13:00:00'	57.79166667	1	NaN	NaN	19.98984888	30.18601994	92.36602883	7.865240535	2077.106587	1936.5455	595.5433256	1.713314109	NaN	NaN	NaN	NaN	NaN	8.5, S
'20-Nov-2022 14:00:00'	57.83333333	1	NaN	NaN	19.97973056	30.18792306	92.30148333	7.865455118	2077.117432	1936.517254	595.1748187	1.713515703	NaN	NaN	NaN	NaN	NaN	8.5, S
'20-Nov-2022 15:00:00'	57.875	1	NaN	NaN	19.97297341	30.189741	92.2734095	7.865669702	2077.128276	1936.489008	594.8850129	1.71376328	NaN	NaN	NaN	NaN	NaN	8.5, S
'20-Nov-2022 16:00:00'	57.91666667	1	NaN	NaN	19.96849408	30.19150366	92.3512465	7.865884285	2077.139121	1936.460761	594.6485571	1.714041972	NaN	NaN	NaN	NaN	NaN	8.5, S
'20-Nov-2022 17:00:00'	57.95833333	1	NaN	NaN	19.96499806	30.19325917	92.42238933	7.866098868	2077.149966	1936.432515	594.4354199	1.714333843	NaN	NaN	NaN	NaN	NaN	8.5, S
'20-Nov-2022 18:00:00'	58	1	NaN	NaN	19.96119194	30.1950475	92.28833267	7.866313452	2077.160811	1936.404269	594.2155185	1.7146211	NaN	NaN	NaN	NaN	NaN	8.5, S
'20-Nov-2022 19:00:00'	58.04166667	1	NaN	NaN	19.95740056	30.19680674	92.207116	7.866528035	2077.171656	1936.376022	593.9956221	1.714908991	NaN	NaN	NaN	NaN	NaN	8.5, S
'20-Nov-2022 20:00:00'	58.08333333	1	NaN	NaN	19.95180194	30.1986375	92.26207767	7.866742618	2077.182501	1936.347776	593.7340844	1.715171789	NaN	NaN	NaN	NaN	NaN	8.5, S
'20-Nov-2022 21:00:00'	58.125	1	NaN	NaN	19.94587889	30.20043556	92.32278467	7.866957202	2077.193346	1936.319529	593.4644952	1.715430773	NaN	NaN	NaN	NaN	NaN	8.5, S
'20-Nov-2022 22:00:00'	58.16666667	1	NaN	NaN	19.93933006	30.20225871	92.34683967	7.867171785	2077.204191	1936.291283	593.1806034	1.71568107	NaN	NaN	NaN	NaN	NaN	8.5, S
'20-Nov-2022 23:00:00'	58.20833333	1	NaN	NaN	19.9323675	30.20411889	93.00432017	7.867386368	2077.215036	1936.263037	592.8876248	1.715925319	NaN	NaN	NaN	NaN	NaN	8.5, S
'21-Nov-2022 00:00:00'	58.25	1	NaN	NaN	19.92524056	30.20591028	92.47219617	7.867600952	2077.225881	1936.23479	592.5898724	1.716168432	NaN	NaN	NaN	NaN	NaN	8.5, S
'21-Nov-2022 01:00:00'	58.29166667	1	NaN	NaN	19.91736387	30.20776667	92.504698	7.867815535	2077.236726	1936.206544	592.2755317	1.716400617	NaN	NaN	NaN	NaN	NaN	8.5, S
'21-Nov-2022 02:00:00'	58.33333333	1	NaN	NaN	19.90861639	30.20962389	92.36862	7.868030118	2077.247571	1936.178298	591.940799	1.716621242	NaN	NaN	NaN	NaN	NaN	8.5, S
'21-Nov-2022 03:00:00'	58.375	1	NaN	NaN	19.8997337	30.21147744	92.44573317	7.868244702	2077.258416	1936.150051	591.6030086	1.716840143	NaN	NaN	NaN	NaN	NaN	8.5, S
'21-Nov-2022 04:00:00'	58.41666667	1	NaN	NaN	19.89035838	30.21333073	93.11420167	7.868459285	2077.26926	1936.121805	591.2537797	1.717052529	NaN	NaN	NaN	NaN	NaN	8.5, S
'21-Nov-2022 05:00:00'	58.45833333	1	NaN	NaN	19.88093101	30.21518911	92.505573	7.868673868	2077.280105	1936.093558	590.9036051	1.717264168	NaN	NaN	NaN	NaN	NaN	8.5, S
'21-Nov-2022 06:00:00'	58.5	1	NaN	NaN	19.87073167	30.21706139	92.479901	7.868888452	2077.29095	1936.065312	590.5356436	1.717465379	NaN	NaN	NaN	NaN	NaN	8.5, S
'21-Nov-2022 07:00:00'	58.54166667	1	NaN	NaN	19.86093064	30.21888858	92.40630667	7.869103035	2077.301795	1936.037066	590.1766171	1.717672578	NaN	NaN	NaN	NaN	NaN	8.5, S
'21-Nov-2022 08:00:00'	58.58333333	1	NaN	NaN	19.85104538	30.22077227	92.99279083	7.869317618	2077.31264	1936.008819	589.8166714	1.71787783	NaN	NaN	NaN	NaN	NaN	8.5, S
'21-Nov-2022 09:00:00'	58.625	1	NaN	NaN	19.84114917	30.22258611	93.3147865	7.869532202	2077.323485	1935.980573	589.4556366	1.718084016	NaN	NaN	NaN	NaN	NaN	8.5, S
'21-Nov-2022 10:00:00'	58.66666667	1	NaN	NaN	19.83102944	30.22442167	92.7037655	7.869746785	2077.33433	1935.952327	589.0898872	1.718286936	NaN	NaN	NaN	NaN	NaN	8.5, S
'21-Nov-2022 11:00:00'	58.70833333	1	NaN	NaN	19.82045983	30.22627416	92.55680983	7.869961368	2077.345175	1935.92408	588.7140359	1.718483666	NaN	NaN	NaN	NaN	NaN	8.5, S
'21-Nov-2022 12:00:00'	58.75	1	NaN	NaN	19.8079225	30.22815389	92.78059633	7.870175952	2077.35602	1935.895834	588.2925823	1.718653953	NaN	NaN	NaN	NaN	NaN	8.5, S
'21-Nov-2022 13:00:00'	58.79166667	1	NaN	NaN	19.79151528	30.23011444	92.54471917	7.870390535	2077.366865	1935.867587	587.781743	1.718771835	NaN	NaN	NaN	NaN	NaN	8.5, S
'21-Nov-2022 14:00:00'	58.83333333	1	NaN	NaN	19.77579606	30.23203324	92.67031383	7.870605118	2077.37771	1935.839341	587.2868353	1.718899535	NaN	NaN	NaN	NaN	NaN	8.5, S
'21-Nov-2022 15:00:00'	58.875	1	NaN	NaN	19.76363778	30.2338525	93.05199467	7.870819702	2077.388555	1935.811095	586.8743347	1.719075914	NaN	NaN	NaN	NaN	NaN	8.5, S
'21-Nov-2022 16:00:00'	58.91666667	1	NaN	NaN	19.75536	30.23560889	93.2937565	7.871034285	2077.3994	1935.782848	586.5521297	1.719304597	NaN	NaN	NaN	NaN	NaN	8.5, S
'21-Nov-2022 17:00:00'	58.95833333	1	NaN	NaN	19.74776022	30.23740644	92.63478733	7.871248868	2077.410244	1935.754602	586.2466052	1.719541636	NaN	NaN	NaN	NaN	NaN	8.5, S
'21-Nov-2022 18:00:00'	59	1	NaN	NaN	19.74108579	30.23913343	93.08384367	7.871463452	2077.421089	1935.726356	585.9618623	1.719791988	NaN	NaN	NaN	NaN	NaN	8.5, S
'21-Nov-2022 19:00:00'	59.04166667	1	NaN	NaN	19.73456222	30.24088583	92.73247067	7.871678035	2077.431934	1935.698109	585.6811766	1.720043957	NaN	NaN	2077.431934	1935.698109	NaN	8.5, S
'21-Nov-2022 20:00:00'	59.08333333	1	NaN	NaN	19.72844691	30.24267135	92.636302	7.871892618	2077.470501	1935.662709	585.2817742	1.720634275	NaN	NaN	NaN	NaN	NaN	8.5, S
'21-Nov-2022 21:00:00'	59.125	1	NaN	NaN	19.72275694	30.24440139	92.94511067	7.872107202	2077.509069	1935.627309	584.8918134	1.721231085	NaN	NaN	NaN	NaN	NaN	8.5, S
'21-Nov-2022 22:00:00'	59.16666667	1	NaN	NaN	19.71761833	30.24613778	93.2510675	7.872321785	2077.547636	1935.591909	584.5151435	1.721835117	NaN	NaN	NaN	NaN	NaN	8.5, S
'21-Nov-2022 23:00:00'	59.20833333	1	NaN	NaN	19.71424607	30.24780393	92.79057917	7.872536368	2077.586203	1935.556509	584.1789775	1.722463593	NaN	NaN	NaN	NaN	NaN	8.5, S
'22-Nov-2022 00:00:00'	59.25	1	NaN	NaN	19.71167639	30.24941167	93.02732183	7.872750952	2077.62477	1935.521109	583.8609292	1.7231036	NaN	NaN	NaN	NaN	NaN	8.5, S
'22-Nov-2022 01:00:00'	59.29166667	1	NaN	NaN	19.70820444	30.25107694	92.90499067	7.872965535	2077.663337	1935.485709	583.5229185	1.723730839	NaN	NaN	NaN	NaN	NaN	8.5, S
'22-Nov-2022 02:00:00'	59.33333333	1	NaN	NaN	19.70491461	30.25274607	92.84560767	7.873180118	2077.701905	1935.450309	583.1894655	1.724360461	NaN	NaN	NaN	NaN	NaN	8.5, S
'22-Nov-2022 03:00:00'	59.375	1	NaN	NaN	19.70257972	30.25439056	93.43874617	7.873394702	2077.740472	1935.414909	582.8781537	1.72500312	NaN	NaN	NaN	NaN	NaN	8.5, S
'22-Nov-2022 04:00:00'	59.41666667	1	NaN	NaN	19.70118139	30.25594333	92.93345667	7.873609285	2077.779039	1935.379509	582.5875248	1.725659598	NaN	NaN	NaN	NaN	NaN	8.5, S
'22-Nov-2022 05:00:00'	59.45833333	1	NaN	NaN	19.69953634	30.25754394	92.78856533	7.873823868	2077.817606	1935.34411	582.2920684	1.726312125	NaN	NaN	NaN	NaN	NaN	8.5, S
'22-Nov-2022 06:00:00'	59.5	1	NaN	NaN	19.69775639	30.25910306	93.06168983	7.874038452	2077.856173	1935.30871	581.9930672	1.726963538	NaN	NaN	NaN	NaN	NaN	8.5, S
'22-Nov-2022 07:00:00'	59.54166667	1	NaN	NaN	19.69589639	30.26071444	92.91580617	7.874253035	2077.89474	1935.27331	581.6931946	1.727613135	NaN	NaN	NaN	NaN	NaN	8.5, S
'22-Nov-2022 08:00:00'	59.58333333	1	NaN	NaN	19.69393006	30.26233567	93.25510017	7.874467618	2077.933308	1935.23791	581.3912112	1.728261213	NaN	NaN	NaN	NaN	NaN	8.5, S
'22-Nov-2022 09:00:00'	59.625	1	NaN	NaN	19.69204361	30.26390139	92.81869433	7.874682202	2077.971875	1935.20251	581.0904788	1.728911233	NaN	NaN	NaN	NaN	NaN	8.5, S
'22-Nov-2022 10:00:00'	59.66666667	1	NaN	NaN	19.69027389	30.26549917	93.94121483	7.874896785	2078.010442	1935.16711	580.7931501	1.729562348	NaN	NaN	NaN	NaN	NaN	8.5, S
'22-Nov-2022 11:00:00'	59.70833333	1	NaN	NaN	19.68843202	30.26710337	92.94398417	7.875111368	2078.049009	1935.13171	580.4944548	1.730212447	NaN	NaN	NaN	NaN	NaN	8.5, S
'22-Nov-2022 12:00:00'	59.75	1	NaN	NaN	19.68591083	30.26871806	93.09027033	7.875325952	2078.087576	1935.09631	580.1803623	1.73085343	NaN	NaN	NaN	NaN	NaN	8.5, S
'22-Nov-2022 13:00:00'	59.79166667	1	NaN	NaN	19.683495	30.27032194	92.884378	7.875540535	2078.126144	1935.06091	579.8687835	1.731496008	NaN	NaN	NaN	NaN	NaN	8.5, S
'22-Nov-2022 14:00:00'	59.83333333	1	NaN	NaN	19.68457809	30.27180787	92.94665583	7.875411368	2078.164711	1935.02551	579.6368198	1.732186772	NaN	NaN	NaN	NaN	NaN	8.5, S
'22-Nov-2022 15:00:00'	59.875	1	NaN	NaN	19.69331417	30.27304389	92.90624767	7.875282202	2078.203278	1934.99011	579.5787408	1.732982824	NaN	NaN	NaN	NaN	NaN	8.5, S
'22-Nov-2022 16:00:00'	59.91666667	1	NaN	NaN	19.70359472	30.27428889	93.084158	7.875153035	2078.241845	1934.95471	579.556673	1.733799351	NaN	NaN	NaN	NaN	NaN	8.5, S
'22-Nov-2022 17:00:00'	59.95833333	1	NaN	NaN	19.71123539	30.27562837	93.05557433	7.875023868	2078.280412	1934.91931	579.4748681	1.734579563	NaN	NaN	NaN	NaN	NaN	8.5, S
'22-Nov-2022 18:00:00'	60	1	NaN	NaN	19.72243222	30.27679889	93.03070983	7.874894702	2078.318979	1934.88391	579.473068	1.735409685	NaN	NaN	NaN	NaN	NaN	8.5, S
'22-Nov-2022 19:00:00'	60.04166667	1	NaN	NaN	19.73320222	30.27802361	93.36582933	7.874765535	2078.357547	1934.84851	579.4622374	1.736233477	NaN	NaN	NaN	NaN	NaN	8.5, S
'22-Nov-2022 20:00:00'	60.08333333	1	NaN	NaN	19.74346394	30.27928563	93.39405033	7.874636368	2078.396114	1934.81311	579.4402399	1.737050104	NaN	NaN	NaN	NaN	NaN	8.5, S
'22-Nov-2022 21:00:00'	60.125	1	NaN	NaN	19.75173167	30.28063694	93.061324	7.874507202	2078.434681	1934.77771	579.3734163	1.737839001	NaN	NaN	NaN	NaN	NaN	8.5, S
'22-Nov-2022 22:00:00'	60.16666667	1	NaN	NaN	19.75880778	30.28203833	93.06693433	7.874378035	2078.473248	1934.74231	579.2797961	1.738611403	NaN	NaN	NaN	NaN	NaN	8.5, S
'22-Nov-2022 23:00:00'	60.20833333	1	NaN	NaN	19.76557303	30.28345618	93.2532775	7.874248868	2078.511815	1934.70691	579.1792994	1.739379524	NaN	NaN	NaN	NaN	NaN	8.5, S
'23-Nov-2022 00:00:00'	60.25	1	NaN	NaN	19.77264361	30.28482611	93.47970617	7.874119702	2078.550383	1934.67151	579.0852491	1.740152555	NaN	NaN	NaN	NaN	NaN	8.5, S
'23-Nov-2022 01:00:00'	60.29166667	1	NaN	NaN	19.78040806	30.28616556	93.303794	7.873990535	2078.58895	1934.63611	579.0068973	1.740935407	NaN	NaN	NaN	NaN	NaN	8.5, S
'23-Nov-2022 02:00:00'	60.33333333	1	NaN	NaN	19.78866292	30.28749944	93.935559	7.873861368	2078.627517	1934.60071	578.9398948	1.741724998	NaN	NaN	NaN	NaN	NaN	8.5, S
'23-Nov-2022 03:00:00'	60.375	1	NaN	NaN	19.7966075	30.28878917	93.245738	7.873732202	2078.666084	1934.56531	578.8651279	1.742511261	NaN	NaN	NaN	NaN	NaN	8.5, S
'23-Nov-2022 04:00:00'	60.41666667	1	NaN	NaN	19.80350444	30.29014194	93.29757567	7.873603035	2078.704651	1934.52991	578.7671178	1.743282699	NaN	NaN	NaN	NaN	NaN	8.5, S
'23-Nov-2022 05:00:00'	60.45833333	1	NaN	NaN	19.80892163	30.291575	93.91819433	7.873473868	2078.743218	1934.49451	578.6361319	1.74403326	NaN	NaN	NaN	NaN	NaN	8.5, S
'23-Nov-2022 06:00:00'	60.5	1	NaN	NaN	19.81387833	30.2930025	93.25598033	7.873344702	2078.781786	1934.45911	578.4945059	1.744777852	NaN	NaN	NaN	NaN	NaN	8.5, S
'23-Nov-2022 07:00:00'	60.54166667	1	NaN	NaN	19.81753722	30.29446806	93.20793617	7.873215535	2078.820353	1934.42371	578.3235249	1.745504613	NaN	NaN	NaN	NaN	NaN	8.5, S
'23-Nov-2022 08:00:00'	60.58333333	1	NaN	NaN	19.82034916	30.29596966	93.30930667	7.873086368	2078.85892	1934.38831	578.1336095	1.746219578	NaN	NaN	NaN	NaN	NaN	8.5, S
'23-Nov-2022 09:00:00'	60.625	1	NaN	NaN	19.82176278	30.29751333	93.266092	7.872957202	2078.897487	1934.35291	577.9121225	1.746915276	NaN	NaN	NaN	NaN	NaN	8.5, S
'23-Nov-2022 10:00:00'	60.66666667	1	NaN	NaN	19.82257187	30.29908774	94.0294865	7.872828035	2078.936054	1934.317511	577.6772712	1.747602474	NaN	NaN	NaN	NaN	NaN	8.5, S
'23-Nov-2022 11:00:00'	60.70833333	1	NaN	NaN	19.82414734	30.30063557	93.41134833	7.872698868	2078.974622	1934.282111	577.459888	1.748300377	NaN	NaN	NaN	NaN	NaN	8.5, S
'23-Nov-2022 12:00:00'	60.75	1	NaN	NaN	19.82649139	30.30212806	93.2465335	7.872569702	2079.013189	1934.246711	577.2595802	1.749009471	NaN	NaN	NaN	NaN	NaN	8.5, S
'23-Nov-2022 13:00:00'	60.79166667	1	NaN	NaN	19.82903306	30.30361639	93.66197567	7.872440535	2079.051756	1934.211311	577.0639074	1.749721333	NaN	NaN	NaN	NaN	NaN	8.5, S
'23-Nov-2022 14:00:00'	60.83333333	1	NaN	NaN	19.83329719	30.30505421	93.72617733	7.872328035	2079.090323	1934.175911	576.9073672	1.750457084	NaN	NaN	NaN	NaN	NaN	8.5, S
'23-Nov-2022 15:00:00'	60.875	1	NaN	NaN	19.84052417	30.30640389	93.246971	7.872215535	2079.12889	1934.140511	576.8179896	1.751233933	NaN	NaN	NaN	NaN	NaN	8.5, S
'23-Nov-2022 16:00:00'	60.91666667	1	NaN	NaN	19.85110028	30.30769722	93.40996783	7.872103035	2079.167457	1934.105111	576.8051213	1.752056612	NaN	NaN	NaN	NaN	NaN	8.5, S
'23-Nov-2022 17:00:00'	60.95833333	1	NaN	NaN	19.8627059	30.30897303	93.31835617	7.871990535	2079.206025	1934.069711	576.8158059	1.752893515	NaN	NaN	NaN	NaN	NaN	8.5, S
'23-Nov-2022 18:00:00'	61	1	NaN	NaN	19.87433222	30.31025778	93.29251183	7.871878035	2079.244592	1934.034311	576.8271592	1.753730729	NaN	NaN	NaN	NaN	NaN	8.5, S
'23-Nov-2022 19:00:00'	61.04166667	1	NaN	NaN	19.88614667	30.31149444	93.46516433	7.871765535	2079.283159	1933.998911	576.8422019	1.754571392	NaN	NaN	NaN	NaN	NaN	8.5, S
'23-Nov-2022 20:00:00'	61.08333333	1	NaN	NaN	19.89749242	30.31281152	93.94711733	7.871653035	2079.321726	1933.963511	576.847678	1.755404684	NaN	NaN	NaN	NaN	NaN	8.5, S
'23-Nov-2022 21:00:00'	61.125	1	NaN	NaN	19.90844306	30.31408889	93.41643483	7.871540535	2079.360293	1933.928111	576.8435136	1.756233461	NaN	NaN	NaN	NaN	NaN	8.5, S
'23-Nov-2022 22:00:00'	61.16666667	1	NaN	NaN	19.918745	30.31539278	93.36364867	7.871428035	2079.398861	1933.892711	576.8248379	1.757053271	NaN	NaN	NaN	NaN	NaN	8.5, S
'23-Nov-2022 23:00:00'	61.20833333	1	NaN	NaN	19.92827725	30.31673062	93.651122	7.871315535	2079.437428	1933.857311	576.788973	1.757862353	NaN	NaN	NaN	NaN	NaN	8.5, S
'24-Nov-2022 00:00:00'	61.25	1	NaN	NaN	19.93741472	30.31805667	93.66643283	7.871203035	2079.475995	1933.821911	576.7438947	1.758666453	NaN	NaN	NaN	NaN	NaN	8.5, S
'24-Nov-2022 01:00:00'	61.29166667	1	NaN	NaN	19.94577361	30.31938083	93.6864155	7.871090535	2079.514562	1933.786511	576.6809021	1.759460243	NaN	NaN	NaN	NaN	NaN	8.5, S
'24-Nov-2022 02:00:00'	61.33333333	1	NaN	NaN	19.9540632	30.32076685	93.5896245	7.870978035	2079.553129	1933.751111	576.617295	1.760252252	NaN	NaN	NaN	NaN	NaN	8.5, S
'24-Nov-2022 03:00:00'	61.375	1	NaN	NaN	19.96172222	30.32210389	93.48309717	7.870865535	2079.591696	1933.715711	576.5385002	1.761036663	NaN	NaN	NaN	NaN	NaN	8.5, S
'24-Nov-2022 04:00:00'	61.41666667	1	NaN	NaN	19.96902611	30.3234775	93.72903933	7.870753035	2079.630264	1933.680311	576.4521351	1.761815829	NaN	NaN	NaN	NaN	NaN	8.5, S
'24-Nov-2022 05:00:00'	61.45833333	1	NaN	NaN	19.9761031	30.32487014	93.62459833	7.870640535	2079.668831	1933.644911	576.3608994	1.762591749	NaN	NaN	NaN	NaN	NaN	8.5, S
'24-Nov-2022 06:00:00'	61.5	1	NaN	NaN	19.98277091	30.32623823	93.70405117	7.870528035	2079.707398	1933.609511	576.2599536	1.763362646	NaN	NaN	NaN	NaN	NaN	8.5, S
'24-Nov-2022 07:00:00'	61.54166667	1	NaN	NaN	19.98880028	30.32762833	93.661984	7.870415535	2079.745965	1933.574111	576.1447085	1.764124686	NaN	NaN	NaN	NaN	NaN	8.5, S
'24-Nov-2022 08:00:00'	61.58333333	1	NaN	NaN	19.99403989	30.32905871	93.75884433	7.870303035	2079.784532	1933.538711	576.0119576	1.764875528	NaN	NaN	NaN	NaN	NaN	8.5, S
'24-Nov-2022 09:00:00'	61.625	1	NaN	NaN	19.99886694	30.33047778	93.687076	7.870190535	2079.8231	1933.503311	575.8696376	1.765621066	NaN	NaN	NaN	NaN	NaN	8.5, S
'24-Nov-2022 10:00:00'	61.66666667	1	NaN	NaN	20.00346083	30.33192389	93.59549117	7.870078035	2079.861667	1933.467911	575.7224496	1.766363111	NaN	NaN	NaN	NaN	NaN	8.5, S
'24-Nov-2022 11:00:00'	61.70833333	1	NaN	NaN	20.00701236	30.33338764	93.7409055	7.869965535	2079.900234	1933.432511	575.5516382	1.767090874	NaN	NaN	NaN	NaN	NaN	8.5, S
'24-Nov-2022 12:00:00'	61.75	1	NaN	NaN	20.00965056	30.33483611	94.02089867	7.869853035	2079.938801	1933.397111	575.3597073	1.767806608	NaN	NaN	NaN	NaN	NaN	8.5, S
'24-Nov-2022 13:00:00'	61.79166667	1	NaN	NaN	20.01334417	30.33630417	93.61151617	7.869740535	2079.977368	1933.361711	575.1924643	1.768536362	NaN	NaN	NaN	NaN	NaN	8.5, S
'24-Nov-2022 14:00:00'	61.83333333	1	NaN	NaN	20.01794129	30.33776152	93.864138	7.869748868	2080.015935	1933.326311	575.0459499	1.769278575	NaN	NaN	NaN	NaN	NaN	8.5, S
'24-Nov-2022 15:00:00'	61.875	1	NaN	NaN	20.02632167	30.33905444	94.602065	7.869757202	2080.054503	1933.290912	574.9840817	1.77007466	NaN	NaN	NaN	NaN	NaN	8.5, S
'24-Nov-2022 16:00:00'	61.91666667	1	NaN	NaN	20.03879889	30.34021811	93.8874625	7.869765535	2080.09307	1933.255512	575.0145528	1.770928382	NaN	NaN	NaN	NaN	NaN	8.5, S
'24-Nov-2022 17:00:00'	61.95833333	1	NaN	NaN	20.05249944	30.34137675	94.03020183	7.869773868	2080.131637	1933.220112	575.073131	1.771798946	NaN	NaN	NaN	NaN	NaN	8.5, S
'24-Nov-2022 18:00:00'	62	1	NaN	NaN	20.06589833	30.34252083	93.76324767	7.869782202	2080.170204	1933.184712	575.1246185	1.772665864	NaN	NaN	NaN	NaN	NaN	8.5, S
'24-Nov-2022 19:00:00'	62.04166667	1	NaN	NaN	20.07937306	30.34365889	93.84314667	7.869790535	2080.208771	1933.149312	575.1778192	1.773534114	NaN	NaN	NaN	NaN	NaN	8.5, S
'24-Nov-2022 20:00:00'	62.08333333	1	NaN	NaN	20.09245871	30.34479494	93.82812533	7.869798868	2080.247339	1933.113912	575.2221036	1.774397322	NaN	NaN	NaN	NaN	NaN	8.5, S
'24-Nov-2022 21:00:00'	62.125	1	NaN	NaN	20.10471139	30.34595833	94.2275475	7.869807202	2080.285906	1933.078512	575.2476971	1.775248983	NaN	NaN	NaN	NaN	NaN	8.5, S
'24-Nov-2022 22:00:00'	62.16666667	1	NaN	NaN	20.11571722	30.34712222	93.96564667	7.869815535	2080.324473	1933.043112	575.2446892	1.77608388	NaN	NaN	NaN	NaN	NaN	8.5, S
'24-Nov-2022 23:00:00'	62.20833333	1	NaN	NaN	20.12542472	30.34834494	93.94639417	7.869823868	2080.36304	1933.007712	575.2127595	1.77690035	NaN	NaN	NaN	NaN	NaN	8.5, S
'25-Nov-2022 00:00:00'	62.25	1	NaN	NaN	20.13390861	30.34964778	93.915915	7.869832202	2080.401607	1932.972312	575.1539469	1.777699041	NaN	NaN	NaN	NaN	NaN	8.5, S
'25-Nov-2022 01:00:00'	62.29166667	1	NaN	NaN	20.1423125	30.35092972	93.93965383	7.869840535	2080.440174	1932.936912	575.0930564	1.778497104	NaN	NaN	NaN	NaN	NaN	8.5, S
'25-Nov-2022 02:00:00'	62.33333333	1	NaN	NaN	20.15090449	30.3521823	94.74677317	7.869848868	2080.478742	1932.901512	575.036125	1.779298326	NaN	NaN	NaN	NaN	NaN	8.5, S
'25-Nov-2022 03:00:00'	62.375	1	NaN	NaN	20.15895627	30.35343008	94.034184	7.869857202	2080.517309	1932.866112	574.9667782	1.780092396	NaN	NaN	NaN	NaN	NaN	8.5, S
'25-Nov-2022 04:00:00'	62.41666667	1	NaN	NaN	20.16695706	30.35469418	93.970998	7.869865535	2080.555876	1932.830712	574.8965717	1.780885631	NaN	NaN	NaN	NaN	NaN	8.5, S
'25-Nov-2022 05:00:00'	62.45833333	1	NaN	NaN	20.17510787	30.35596292	94.07667183	7.869873868	2080.594443	1932.795312	574.8299507	1.78168096	NaN	NaN	NaN	NaN	NaN	8.5, S
'25-Nov-2022 06:00:00'	62.5	1	NaN	NaN	20.18349861	30.35717389	93.945935	7.869882202	2080.63301	1932.759912	574.7680601	1.782480613	NaN	NaN	NaN	NaN	NaN	8.5, S
'25-Nov-2022 07:00:00'	62.54166667	1	NaN	NaN	20.19245515	30.35836045	94.03312733	7.869890535	2080.671578	1932.724512	574.7188722	1.783288509	NaN	NaN	NaN	NaN	NaN	8.5, S
'25-Nov-2022 08:00:00'	62.58333333	1	NaN	NaN	20.20142325	30.35954846	94.6223015	7.869898868	2080.710145	1932.689112	574.6700368	1.784096675	NaN	NaN	NaN	NaN	NaN	8.5, S
'25-Nov-2022 09:00:00'	62.625	1	NaN	NaN	20.2103075	30.36073917	94.01706433	7.869907202	2080.748712	1932.653712	574.6193818	1.784903788	NaN	NaN	NaN	NaN	NaN	8.5, S
'25-Nov-2022 10:00:00'	62.66666667	1	NaN	NaN	20.21934639	30.36188667	94.194029	7.869915535	2080.787279	1932.618312	574.5717066	1.785713847	NaN	NaN	NaN	NaN	NaN	8.5, S
'25-Nov-2022 11:00:00'	62.70833333	1	NaN	NaN	20.22868146	30.36306798	93.9952885	7.869923868	2080.825846	1932.582912	574.5313934	1.786527548	NaN	NaN	NaN	NaN	NaN	8.5, S
'25-Nov-2022 12:00:00'	62.75	1	NaN	NaN	20.23807806	30.36422556	93.858091	7.869932202	2080.864413	1932.547512	574.4922067	1.787342616	NaN	NaN	NaN	NaN	NaN	8.5, S
'25-Nov-2022 13:00:00'	62.79166667	1	NaN	NaN	20.24823667	30.36534667	93.827555	7.869940535	2080.902981	1932.512112	574.4700353	1.788168847	NaN	NaN	NaN	NaN	NaN	8.5, S
'25-Nov-2022 14:00:00'	62.83333333	1	NaN	NaN	20.25941099	30.3664062	93.82156583	7.870003035	2080.941548	1932.476712	574.4703279	1.78901014	NaN	NaN	NaN	NaN	NaN	8.5, S
'25-Nov-2022 15:00:00'	62.875	1	NaN	NaN	20.27132078	30.36746925	93.779664	7.870065535	2080.980115	1932.441312	574.4876091	1.789861628	NaN	NaN	NaN	NaN	NaN	8.5, S
'25-Nov-2022 16:00:00'	62.91666667	1	NaN	NaN	20.2837775	30.36845889	94.16921217	7.870128035	2081.018682	1932.405912	574.5164178	1.790721989	NaN	NaN	NaN	NaN	NaN	8.5, S
'25-Nov-2022 17:00:00'	62.95833333	1	NaN	NaN	20.29586124	30.3695	93.85581367	7.870190535	2081.057249	1932.370512	574.5374815	1.791576591	NaN	NaN	NaN	NaN	NaN	8.5, S
'25-Nov-2022 18:00:00'	63	1	NaN	NaN	20.307461	30.37055097	94.00625417	7.870253035	2081.095817	1932.335112	574.5476404	1.792424576	NaN	NaN	NaN	NaN	NaN	8.5, S
'25-Nov-2022 19:00:00'	63.04166667	1	NaN	NaN	20.3193964	30.37158892	93.81455033	7.870315535	2081.134384	1932.299712	574.5653668	1.793277561	NaN	NaN	NaN	NaN	NaN	8.5, S
'25-Nov-2022 20:00:00'	63.08333333	1	NaN	NaN	20.33113596	30.37264747	93.72424567	7.870378035	2081.172951	1932.264313	574.5789595	1.794127703	NaN	NaN	NaN	NaN	NaN	8.5, S
'25-Nov-2022 21:00:00'	63.125	1	NaN	NaN	20.3419025	30.37371278	93.97072	7.870440535	2081.211518	1932.228913	574.5703802	1.794964533	NaN	NaN	NaN	NaN	NaN	8.5, S
'25-Nov-2022 22:00:00'	63.16666667	1	NaN	NaN	20.35075972	30.37489028	93.64196733	7.870503035	2081.250085	1932.193513	574.5197024	1.795773427	NaN	NaN	NaN	NaN	NaN	8.5, S
'25-Nov-2022 23:00:00'	63.20833333	1	NaN	NaN	20.35612584	30.37621657	93.70440817	7.870565535	2081.288652	1932.158113	574.3911936	1.796531971	NaN	NaN	NaN	NaN	NaN	8.5, S
'26-Nov-2022 00:00:00'	63.25	1	NaN	NaN	20.35904833	30.37759444	93.57890817	7.870628035	2081.32722	1932.122713	574.2074964	1.797256112	NaN	NaN	NaN	NaN	NaN	8.5, S
'26-Nov-2022 01:00:00'	63.29166667	1	NaN	NaN	20.36017465	30.37906574	93.51609233	7.870690535	2081.365787	1932.087313	573.98412	1.797954055	NaN	NaN	NaN	NaN	NaN	8.5, S
'26-Nov-2022 02:00:00'	63.33333333	1	NaN	NaN	20.3606591	30.38059272	93.67648283	7.870753035	2081.404354	1932.051913	573.7470034	1.798642297	NaN	NaN	NaN	NaN	NaN	8.5, S
'26-Nov-2022 03:00:00'	63.375	1	NaN	NaN	20.36064417	30.38211944	93.60934517	7.870815535	2081.442921	1932.016513	573.4986036	1.799323707	NaN	NaN	NaN	NaN	NaN	8.5, S
'26-Nov-2022 04:00:00'	63.41666667	1	NaN	NaN	20.35955278	30.38368611	93.732976	7.870878035	2081.481488	1931.981113	573.2263126	1.799989672	NaN	NaN	NaN	NaN	NaN	8.5, S
'26-Nov-2022 05:00:00'	63.45833333	1	NaN	NaN	20.35805211	30.38530169	93.58654933	7.870940535	2081.520056	1931.945713	572.9455626	1.800649232	NaN	NaN	NaN	NaN	NaN	8.5, S
'26-Nov-2022 06:00:00'	63.5	1	NaN	NaN	20.35535485	30.3869205	93.39519117	7.871003035	2081.558623	1931.910313	572.6376843	1.801292279	NaN	NaN	NaN	NaN	NaN	8.5, S
'26-Nov-2022 07:00:00'	63.54166667	1	NaN	NaN	20.35203528	30.388615	93.37024517	7.871065535	2081.59719	1931.874913	572.3169117	1.801925537	NaN	NaN	NaN	NaN	NaN	8.5, S
'26-Nov-2022 08:00:00'	63.58333333	1	NaN	NaN	20.34870562	30.3902559	93.35425333	7.871128035	2081.635757	1931.839513	571.9953563	1.80255956	NaN	NaN	NaN	NaN	NaN	8.5, S
'26-Nov-2022 09:00:00'	63.625	1	NaN	NaN	20.3450425	30.39191139	93.49832533	7.871190535	2081.674324	1931.804113	571.6666346	1.803188773	NaN	NaN	NaN	NaN	NaN	8.5, S
'26-Nov-2022 10:00:00'	63.66666667	1	NaN	NaN	20.34142222	30.39358556	93.51301867	7.871253035	2081.712891	1931.768713	571.3394076	1.803818298	NaN	NaN	NaN	NaN	NaN	8.5, S
'26-Nov-2022 11:00:00'	63.70833333	1	NaN	NaN	20.33754888	30.39525758	93.373362	7.871315535	2081.751459	1931.733313	571.0066169	1.804444393	NaN	NaN	NaN	NaN	NaN	8.5, S
'26-Nov-2022 12:00:00'	63.75	1	NaN	NaN	20.33387214	30.39691616	93.30413367	7.871378035	2081.790026	1931.697913	570.6783597	1.805073446	NaN	NaN	NaN	NaN	NaN	8.5, S
'26-Nov-2022 13:00:00'	63.79166667	1	NaN	NaN	20.33128116	30.39853518	93.96580467	7.871440535	2081.828593	1931.662513	570.3745117	1.80571815	NaN	NaN	NaN	NaN	NaN	8.5, S
'26-Nov-2022 14:00:00'	63.83333333	1	NaN	NaN	20.32904242	30.40016994	93.67852883	7.871492618	2081.86716	1931.627113	570.079136	1.806367482	NaN	NaN	NaN	NaN	NaN	8.5, S
'26-Nov-2022 15:00:00'	63.875	1	NaN	NaN	20.33113417	30.40166472	96.36451583	7.871544702	2081.905727	1931.591713	569.8805348	1.807078893	NaN	NaN	NaN	NaN	NaN	8.5, S
'26-Nov-2022 16:00:00'	63.91666667	1	NaN	NaN	20.33646546	30.40310251	96.33914567	7.871596785	2081.944295	1931.556313	569.7549858	1.807836008	NaN	NaN	NaN	NaN	NaN	8.5, S
'26-Nov-2022 17:00:00'	63.95833333	1	NaN	NaN	20.34193978	30.40456919	96.80087017	7.871648868	2081.982862	1931.520913	569.6332059	1.808594708	NaN	NaN	NaN	NaN	NaN	8.5, S
'26-Nov-2022 18:00:00'	64	1	NaN	NaN	20.34726944	30.40602556	96.38562083	7.871700952	2082.021429	1931.485513	569.508072	1.809351667	NaN	NaN	NaN	NaN	NaN	8.5, S
'26-Nov-2022 19:00:00'	64.04166667	1	NaN	NaN	20.35187111	30.40750694	96.4314815	7.871753035	2082.059996	1931.450113	569.3668303	1.810098237	NaN	NaN	NaN	NaN	NaN	8.5, S
'26-Nov-2022 20:00:00'	64.08333333	1	NaN	NaN	20.3564107	30.40896507	96.39871067	7.871805118	2082.098563	1931.414713	569.2239344	1.810844411	NaN	NaN	NaN	NaN	NaN	8.5, S
'26-Nov-2022 21:00:00'	64.125	1	NaN	NaN	20.36054681	30.4104277	96.3426875	7.871857202	2082.13713	1931.379313	569.0720273	1.811585008	NaN	NaN	NaN	NaN	NaN	8.5, S
'26-Nov-2022 22:00:00'	64.16666667	1	NaN	NaN	20.36532972	30.41185528	96.50430717	7.871909285	2082.175698	1931.343913	568.9344163	1.812335204	NaN	NaN	NaN	NaN	NaN	8.5, S
'26-Nov-2022 23:00:00'	64.20833333	1	NaN	NaN	20.37082753	30.41325815	96.43045033	7.871961368	2082.214265	1931.308513	568.8127898	1.81309578	NaN	NaN	NaN	NaN	NaN	8.5, S
'27-Nov-2022 00:00:00'	64.25	1	NaN	NaN	20.37412033	30.41471783	95.1220835	7.872013452	2082.252832	1931.273113	568.6419742	1.813824982	NaN	NaN	NaN	NaN	NaN	8.5, S
'27-Nov-2022 01:00:00'	64.29166667	1	NaN	NaN	20.37656648	30.41621773	93.24396917	7.872065535	2082.291399	1931.237714	568.4526264	1.814541861	NaN	NaN	NaN	NaN	NaN	8.5, S
'27-Nov-2022 02:00:00'	64.33333333	1	NaN	NaN	20.38036292	30.41768455	93.25164	7.872117618	2082.329966	1931.202314	568.2935853	1.815278047	NaN	NaN	NaN	NaN	NaN	8.5, S
'27-Nov-2022 03:00:00'	64.375	1	NaN	NaN	20.38339304	30.4191454	93.26426467	7.872169702	2082.368534	1931.166914	568.1171656	1.816003784	NaN	NaN	NaN	NaN	NaN	8.5, S
'27-Nov-2022 04:00:00'	64.41666667	1	NaN	NaN	20.38501939	30.42067424	93.36768333	7.872221785	2082.407101	1931.131514	567.9099951	1.816709005	NaN	NaN	NaN	NaN	NaN	8.5, S
'27-Nov-2022 05:00:00'	64.45833333	1	NaN	NaN	20.38593904	30.42230843	93.3649565	7.872273868	2082.445668	1931.096114	567.6884655	1.817402733	NaN	NaN	NaN	NaN	NaN	8.5, S
'27-Nov-2022 06:00:00'	64.5	1	NaN	NaN	20.38610111	30.42387611	93.53894583	7.872325952	2082.484235	1931.060714	567.448932	1.818087106	NaN	NaN	NaN	NaN	NaN	8.5, S
'27-Nov-2022 07:00:00'	64.54166667	1	NaN	NaN	20.38579499	30.42548802	93.14537683	7.872378035	2082.522802	1931.025314	567.1995907	1.818764294	NaN	NaN	NaN	NaN	NaN	8.5, S
'27-Nov-2022 08:00:00'	64.58333333	1	NaN	NaN	20.38486415	30.4271098	93.27473167	7.872430118	2082.561369	1930.989914	566.9364063	1.819432693	NaN	NaN	NaN	NaN	NaN	8.5, S
'27-Nov-2022 09:00:00'	64.625	1	NaN	NaN	20.38446361	30.42873139	93.66701083	7.872482202	2082.599937	1930.954514	566.6854107	1.820108484	NaN	NaN	NaN	NaN	NaN	8.5, S
'27-Nov-2022 10:00:00'	64.66666667	1	NaN	NaN	20.38462083	30.43029667	93.17898867	7.872534285	2082.638504	1930.919114	566.4463931	1.820792987	NaN	NaN	NaN	NaN	NaN	8.5, S
'27-Nov-2022 11:00:00'	64.70833333	1	NaN	NaN	20.38385537	30.43191158	93.266743	7.872586368	2082.677071	1930.883714	566.1873765	1.821463901	NaN	NaN	NaN	NaN	NaN	8.5, S
'27-Nov-2022 12:00:00'	64.75	1	NaN	NaN	20.3827385	30.43353934	93.70065667	7.872638452	2082.715638	1930.848314	565.9207744	1.82212976	NaN	NaN	NaN	NaN	NaN	8.5, S
'27-Nov-2022 13:00:00'	64.79166667	1	NaN	NaN	20.38211639	30.43514833	93.18267233	7.872690535	2082.754205	1930.812914	565.6652699	1.822802831	NaN	NaN	NaN	NaN	NaN	8.5, S
'27-Nov-2022 14:00:00'	64.83333333	1	NaN	NaN	20.38307949	30.43669747	93.17836367	7.872742618	2082.792773	1930.777514	565.4448996	1.823498945	NaN	NaN	NaN	NaN	NaN	8.5, S
'27-Nov-2022 15:00:00'	64.875	1	NaN	NaN	20.38746825	30.43807437	93.14570717	7.872794702	2082.83134	1930.742114	565.2995794	1.824245552	NaN	NaN	NaN	NaN	NaN	8.5, S
'27-Nov-2022 16:00:00'	64.91666667	1	NaN	NaN	20.3942723	30.43932299	93.01378283	7.872846785	2082.869907	1930.706714	565.2070623	1.825027934	NaN	NaN	NaN	NaN	NaN	8.5, S
'27-Nov-2022 17:00:00'	64.95833333	1	NaN	NaN	20.40191966	30.4405764	93.11751217	7.872898868	2082.908474	1930.671314	565.1337415	1.825822062	NaN	NaN	NaN	NaN	NaN	8.5, S
'27-Nov-2022 18:00:00'	65	1	NaN	NaN	20.41046685	30.44177521	93.26494883	7.872950952	2082.947041	1930.635914	565.0800215	1.826629733	NaN	NaN	NaN	NaN	NaN	8.5, S
'27-Nov-2022 19:00:00'	65.04166667	1	NaN	NaN	20.42048615	30.44288532	93.14574183	7.873003035	2082.985608	1930.600514	565.0583251	1.827459499	NaN	NaN	NaN	NaN	NaN	8.5, S
'27-Nov-2022 20:00:00'	65.08333333	1	NaN	NaN	20.43240873	30.44392592	93.00047867	7.873055118	2083.024176	1930.565114	565.0786628	1.828317077	NaN	NaN	NaN	NaN	NaN	8.5, S
'27-Nov-2022 21:00:00'	65.125	1	NaN	NaN	20.44592083	30.44491639	93.01628383	7.873107202	2083.062743	1930.529714	565.134228	1.829197823	NaN	NaN	NaN	NaN	NaN	8.5, S
'27-Nov-2022 22:00:00'	65.16666667	1	NaN	NaN	20.46025933	30.44584791	93.02103133	7.873159285	2083.10131	1930.494314	565.2076585	1.830091289	NaN	NaN	NaN	NaN	NaN	8.5, S
'27-Nov-2022 23:00:00'	65.20833333	1	NaN	NaN	20.47688319	30.44670784	93.1691105	7.873211368	2083.139877	1930.458914	565.3317345	1.831018068	NaN	NaN	NaN	NaN	NaN	8.5, S
'28-Nov-2022 00:00:00'	65.25	1	NaN	NaN	20.49570194	30.44748639	93.0195805	7.873263452	2083.178444	1930.423514	565.5042909	1.831977137	NaN	NaN	NaN	NaN	NaN	8.5, S
'28-Nov-2022 01:00:00'	65.29166667	1	NaN	NaN	20.51577278	30.44820917	93.03501333	7.873315535	2083.217012	1930.388114	565.7044216	1.832954968	NaN	NaN	NaN	NaN	NaN	8.5, S
'28-Nov-2022 02:00:00'	65.33333333	1	NaN	NaN	20.53685239	30.44890873	92.826956	7.873367618	2083.255579	1930.352714	565.9271211	1.833947658	NaN	NaN	NaN	NaN	NaN	8.5, S
'28-Nov-2022 03:00:00'	65.375	1	NaN	NaN	20.55672355	30.44964875	92.80409533	7.873419702	2083.294146	1930.317314	566.1231909	1.834923131	NaN	NaN	NaN	NaN	NaN	8.5, S
'28-Nov-2022 04:00:00'	65.41666667	1	NaN	NaN	20.57256361	30.45049111	92.892036	7.873471785	2083.332713	1930.281914	566.2296675	1.835840752	NaN	NaN	NaN	NaN	NaN	8.5, S
'28-Nov-2022 05:00:00'	65.45833333	1	NaN	NaN	20.58492761	30.45147408	92.8968005	7.873523868	2083.37128	1930.246514	566.2596301	1.836707528	NaN	NaN	NaN	NaN	NaN	8.5, S
'28-Nov-2022 06:00:00'	65.5	1	NaN	NaN	20.59482244	30.45250609	93.00772633	7.873575952	2083.409847	1930.211115	566.2345156	1.837539033	NaN	NaN	NaN	NaN	NaN	8.5, S
'28-Nov-2022 07:00:00'	65.54166667	1	NaN	NaN	20.60330694	30.45358833	92.781516	7.873628035	2083.448415	1930.175715	566.1782978	1.83835005	NaN	NaN	NaN	NaN	NaN	8.5, S
'28-Nov-2022 08:00:00'	65.58333333	1	NaN	NaN	20.61123146	30.45469045	92.8187125	7.873680118	2083.486982	1930.140315	566.1097723	1.839152997	NaN	NaN	NaN	NaN	NaN	8.5, S
'28-Nov-2022 09:00:00'	65.625	1	NaN	NaN	20.61906045	30.4557922	92.65625183	7.873732202	2083.525549	1930.104915	566.0391494	1.839954731	NaN	NaN	NaN	NaN	NaN	8.5, S
'28-Nov-2022 10:00:00'	65.66666667	1	NaN	NaN	20.62679391	30.45690055	92.62384767	7.873784285	2083.564116	1930.069515	565.9665317	1.840755132	NaN	NaN	NaN	NaN	NaN	8.5, S
'28-Nov-2022 11:00:00'	65.70833333	1	NaN	NaN	20.63436028	30.45799577	92.60374367	7.873836368	2083.602683	1930.034115	565.8900153	1.841553525	NaN	NaN	NaN	NaN	NaN	8.5, S
'28-Nov-2022 12:00:00'	65.75	1	NaN	NaN	20.64183833	30.45916194	92.7178545	7.873888452	2083.641251	1929.998715	565.8126062	1.842349589	NaN	NaN	NaN	NaN	NaN	8.5, S
'28-Nov-2022 13:00:00'	65.79166667	1	NaN	NaN	20.64998496	30.46026017	92.66010933	7.873940535	2083.679818	1929.963315	565.7493743	1.843156355	NaN	NaN	NaN	NaN	NaN	8.5, S
'28-Nov-2022 14:00:00'	65.83333333	1	NaN	NaN	20.65713193	30.46143922	92.57329083	7.873990535	2083.718385	1929.927915	565.6648132	1.843947769	NaN	NaN	2083.718385	NaN	NaN	8.5, S
'28-Nov-2022 15:00:00'	65.875	1	NaN	NaN	20.66507028	30.46262583	92.64608533	7.874040535	2083.660204	1929.892515	565.9211461	1.843799154	NaN	NaN	NaN	NaN	NaN	8.5, S
'28-Nov-2022 16:00:00'	65.91666667	1	NaN	NaN	20.67354513	30.46378552	92.52716967	7.874090535	2083.602022	1929.857115	566.1893241	1.84365857	NaN	NaN	NaN	NaN	NaN	8.5, S
'28-Nov-2022 17:00:00'	65.95833333	1	NaN	NaN	20.67911461	30.46511854	92.78039167	7.874140535	2083.543841	1929.821715	566.3944375	1.843474146	NaN	NaN	NaN	NaN	NaN	8.5, S
'28-Nov-2022 18:00:00'	66	1	NaN	NaN	20.6844928	30.46643712	92.62700417	7.874190535	2083.48566	1929.786315	566.5950848	1.843287286	NaN	NaN	NaN	NaN	NaN	8.5, S
'28-Nov-2022 19:00:00'	66.04166667	1	NaN	NaN	20.69007778	30.46777639	92.482596	7.874240535	2083.427478	1929.750915	566.8007827	1.843102998	NaN	NaN	NaN	NaN	NaN	8.5, S
'28-Nov-2022 20:00:00'	66.08333333	1	NaN	NaN	20.69448986	30.46912282	92.56181517	7.874290535	2083.369297	1929.715515	566.9801074	1.84290208	NaN	NaN	NaN	NaN	NaN	8.5, S
'28-Nov-2022 21:00:00'	66.125	1	NaN	NaN	20.69720305	30.47050748	92.50274767	7.874340535	2083.311116	1929.680115	567.1215814	1.842676596	NaN	NaN	NaN	NaN	NaN	8.5, S
'28-Nov-2022 22:00:00'	66.16666667	1	NaN	NaN	20.69833333	30.47197806	92.84851717	7.874390535	2083.252934	1929.644715	567.2285021	1.842427369	NaN	NaN	NaN	NaN	NaN	8.5, S
'28-Nov-2022 23:00:00'	66.20833333	1	NaN	NaN	20.69859522	30.47346882	92.6477325	7.874440535	2083.194753	1929.609315	567.3160746	1.842165584	NaN	NaN	NaN	NaN	NaN	8.5, S
'29-Nov-2022 00:00:00'	66.25	1	NaN	NaN	20.69814123	30.47498524	92.57524817	7.874490535	2083.136572	1929.573915	567.3878248	1.841893299	NaN	NaN	NaN	NaN	NaN	8.5, S
'29-Nov-2022 01:00:00'	66.29166667	1	NaN	NaN	20.69727922	30.47649834	92.73623617	7.874540535	2083.078391	1929.538515	567.4502987	1.841615344	NaN	NaN	NaN	NaN	NaN	8.5, S
'29-Nov-2022 02:00:00'	66.33333333	1	NaN	NaN	20.69542612	30.47808848	92.836126	7.874590535	2083.020209	1929.503115	567.491457	1.841322151	NaN	NaN	NaN	NaN	NaN	8.5, S
'29-Nov-2022 03:00:00'	66.375	1	NaN	NaN	20.69251588	30.47967131	92.921772	7.874640535	2082.962028	1929.467715	567.508567	1.841014229	NaN	NaN	NaN	NaN	NaN	8.5, S
'29-Nov-2022 04:00:00'	66.41666667	1	NaN	NaN	20.688325	30.48134472	92.73117833	7.874690535	2082.903847	1929.432315	567.4979927	1.840686783	NaN	NaN	NaN	NaN	NaN	8.5, S
'29-Nov-2022 05:00:00'	66.45833333	1	NaN	NaN	20.68342801	30.48303782	92.78831317	7.874740535	2082.845665	1929.396915	567.4717253	1.840349079	NaN	NaN	NaN	NaN	NaN	8.5, S
'29-Nov-2022 06:00:00'	66.5	1	NaN	NaN	20.67776556	30.48476278	92.73013833	7.874790535	2082.787484	1929.361515	567.4285788	1.840000145	NaN	NaN	NaN	NaN	NaN	8.5, S
'29-Nov-2022 07:00:00'	66.54166667	1	NaN	NaN	20.67098914	30.48649164	92.62747683	7.874840535	2082.729303	1929.326115	567.3602641	1.839635538	NaN	NaN	NaN	NaN	NaN	8.5, S
'29-Nov-2022 08:00:00'	66.58333333	1	NaN	NaN	20.66411966	30.48824607	92.74839333	7.874890535	2082.671121	1929.290715	567.290226	1.839269252	NaN	NaN	NaN	NaN	NaN	8.5, S
'29-Nov-2022 09:00:00'	66.625	1	NaN	NaN	20.65680526	30.49000222	92.936574	7.874940535	2082.61294	1929.255315	567.2101485	1.838896749	NaN	NaN	NaN	NaN	NaN	8.5, S
'29-Nov-2022 10:00:00'	66.66666667	1	NaN	NaN	20.64883722	30.49176472	92.68900233	7.874990535	2082.554759	1929.219915	567.1153767	1.838515026	NaN	NaN	NaN	NaN	NaN	8.5, S
'29-Nov-2022 11:00:00'	66.70833333	1	NaN	NaN	20.64059549	30.49354394	93.6050015	7.875040535	2082.496577	1929.184516	567.0146695	1.838129253	NaN	NaN	NaN	NaN	NaN	8.5, S
'29-Nov-2022 12:00:00'	66.75	1	NaN	NaN	20.63041556	30.4953775	92.76211133	7.875090535	2082.438396	1929.149116	566.8708999	1.837715444	NaN	NaN	NaN	NaN	NaN	8.5, S
'29-Nov-2022 13:00:00'	66.79166667	1	NaN	NaN	20.61818116	30.49725956	92.8977195	7.875140535	2082.380215	1929.113716	566.6813788	1.837272107	NaN	NaN	NaN	NaN	NaN	8.5, S
'29-Nov-2022 14:00:00'	66.83333333	1	NaN	NaN	20.60528817	30.49910732	92.80183633	7.875578035	2082.322033	1929.078316	566.4765141	1.836820248	NaN	NaN	NaN	NaN	NaN	8.5, S
'29-Nov-2022 15:00:00'	66.875	1	NaN	NaN	20.59426351	30.5009156	92.994889	7.876015535	2082.263852	1929.042916	566.3133932	1.836395365	NaN	NaN	NaN	NaN	NaN	8.5, S
'29-Nov-2022 16:00:00'	66.91666667	1	NaN	NaN	20.58456583	30.50267778	92.71712883	7.876453035	2082.205671	1929.007516	566.1796492	1.835989951	NaN	NaN	NaN	NaN	NaN	8.5, S
'29-Nov-2022 17:00:00'	66.95833333	1	NaN	NaN	20.57629944	30.50441681	93.14844483	7.876890535	2082.14749	1928.972116	566.0779577	1.835605052	NaN	NaN	NaN	NaN	NaN	8.5, S
'29-Nov-2022 18:00:00'	67	1	NaN	NaN	20.5673975	30.50621278	93.51004633	7.877328035	2082.089308	1928.936716	565.9627471	1.835210376	NaN	NaN	NaN	NaN	NaN	8.5, S
'29-Nov-2022 19:00:00'	67.04166667	1	NaN	NaN	20.55996825	30.50802117	94.28459383	7.877765535	2082.031127	1928.901316	565.8810272	1.834836169	NaN	NaN	NaN	NaN	2077.951871	8.5, S
'29-Nov-2022 20:00:00'	67.08333333	1	NaN	NaN	20.54826499	30.51044958	92.86024267	7.878203035	2081.972946	1928.865916	565.7117555	1.834391812	NaN	NaN	2081.972946	1928.865916	NaN	8.5, S
'29-Nov-2022 21:00:00'	67.125	1	NaN	NaN	20.53337028	30.51262556	93.3327185	7.878640535	2081.870276	1927.759231	561.5571989	1.843493893	NaN	NaN	NaN	NaN	NaN	8.5, S
'29-Nov-2022 22:00:00'	67.16666667	1	NaN	NaN	20.51851365	30.5148039	92.9178795	7.879078035	2081.767606	1926.652546	557.4425943	1.852606497	NaN	NaN	NaN	NaN	NaN	8.5, S
'29-Nov-2022 23:00:00'	67.20833333	1	NaN	NaN	20.50373315	30.51699888	92.93974467	7.879515535	2081.664936	1925.545862	553.3685228	1.861729768	NaN	NaN	NaN	NaN	NaN	8.5, S
'30-Nov-2022 00:00:00'	67.25	1	NaN	NaN	20.48870609	30.5192097	93.15373233	7.879953035	2081.562266	1924.439177	549.3273982	1.870859022	NaN	NaN	NaN	NaN	NaN	8.5, S
'30-Nov-2022 01:00:00'	67.29166667	1	NaN	NaN	20.47422389	30.52137083	92.912509	7.880390535	2081.459596	1923.332492	545.3352448	1.880006439	NaN	NaN	NaN	NaN	NaN	8.5, S
'30-Nov-2022 02:00:00'	67.33333333	1	NaN	NaN	20.45910451	30.52356338	93.10885683	7.880828035	2081.356926	1922.225808	541.3668996	1.889153762	NaN	NaN	NaN	NaN	NaN	8.5, S
'30-Nov-2022 03:00:00'	67.375	1	NaN	NaN	20.44354528	30.52578556	93.28144517	7.881265535	2081.254257	1921.119123	537.4264367	1.898303614	NaN	NaN	NaN	NaN	NaN	8.5, S
'30-Nov-2022 04:00:00'	67.41666667	1	NaN	NaN	20.42763407	30.52798006	92.9843935	7.881703035	2081.151587	1920.012438	533.5147039	1.907458084	NaN	NaN	NaN	NaN	NaN	8.5, S
'30-Nov-2022 05:00:00'	67.45833333	1	NaN	NaN	20.41216	30.5301907	93.28686833	7.882140535	2081.048917	1918.905754	529.6488192	1.916627486	NaN	NaN	NaN	NaN	NaN	8.5, S
'30-Nov-2022 06:00:00'	67.5	1	NaN	NaN	20.3970195	30.53238524	92.97229717	7.882578035	2080.946247	1917.799069	525.8255468	1.925810829	NaN	NaN	NaN	NaN	NaN	8.5, S
'30-Nov-2022 07:00:00'	67.54166667	1	NaN	NaN	20.38353906	30.53453601	93.20884667	7.883015535	2080.843577	1916.692384	522.0717813	1.935027547	NaN	NaN	NaN	NaN	NaN	8.5, S
'30-Nov-2022 08:00:00'	67.58333333	1	NaN	NaN	20.37157107	30.5366309	93.1172065	7.883453035	2080.740907	1915.5857	518.3831965	1.944275799	NaN	NaN	NaN	NaN	NaN	8.5, S
'30-Nov-2022 09:00:00'	67.625	1	NaN	NaN	20.36059278	30.53866944	93.25699817	7.883890535	2080.638237	1914.479015	514.747966	1.953548113	NaN	NaN	NaN	NaN	NaN	8.5, S
'30-Nov-2022 10:00:00'	67.66666667	1	NaN	NaN	20.35106964	30.54063983	93.011485	7.884328035	2080.535567	1913.37233	511.1747307	1.962851433	NaN	NaN	NaN	NaN	NaN	8.5, S
'30-Nov-2022 11:00:00'	67.70833333	1	NaN	NaN	20.34273585	30.54257087	93.07183117	7.884765535	2080.432898	1912.265646	507.6575037	1.972181427	NaN	NaN	NaN	NaN	NaN	8.5, S
'30-Nov-2022 12:00:00'	67.75	1	NaN	NaN	20.33443611	30.54443583	93.39484833	7.885203035	2080.330228	1911.158961	504.1716567	1.981521855	NaN	NaN	NaN	NaN	NaN	8.5, S
'30-Nov-2022 13:00:00'	67.79166667	1	NaN	NaN	20.32810139	30.54619276	93.238619	7.885640535	2080.227558	1910.052276	500.7552245	1.990901529	NaN	NaN	NaN	NaN	NaN	8.5, S
'30-Nov-2022 14:00:00'	67.83333333	1	NaN	NaN	20.32692778	30.54723	94.07615567	7.886078035	2080.124888	1908.945591	497.463167	2.000378999	NaN	NaN	2080.124888	1908.945591	NaN	8.5, S
'14-Sep-2022 16:00:00'	-9.083333333	2	NaN	413.0412333	18.40103889	28.44037889	91.074633	8.35342093	2112.360812	1981.135664	586.9654345	1.646233066	0.046058063	-71.34869209	NaN	NaN	NaN	8.5, S
'14-Sep-2022 17:00:00'	-9.041666667	2	NaN	402.5496333	18.41345682	28.44350975	90.99788517	8.349304263	2112.039915	1980.974803	587.834643	1.644733742	0.045817653	-71.32552898	NaN	NaN	NaN	8.5, S
'14-Sep-2022 18:00:00'	-9	2	NaN	400.2261	18.41813445	28.44627451	91.01007367	8.345187596	2111.719017	1980.813942	588.5164015	1.643140491	0.045577244	-71.30213679	NaN	NaN	NaN	8.5, S
'14-Sep-2022 19:00:00'	-8.958333333	2	NaN	401.70465	18.42268889	28.44870417	90.97172783	8.34107093	2111.39812	1980.65308	589.1913161	1.641550541	0.045336834	-71.27851209	NaN	NaN	NaN	8.5, S
'14-Sep-2022 20:00:00'	-8.916666667	2	NaN	404.7824	18.42776111	28.45090083	91.05540317	8.336954263	2111.077222	1980.492219	589.8761282	1.639970747	0.045096424	-71.2546514	NaN	NaN	NaN	8.5, S
'14-Sep-2022 21:00:00'	-8.875	2	NaN	404.7462417	18.43233989	28.45289129	91.02454917	8.332837596	2110.756324	1980.331358	590.5472267	1.638387803	0.044856015	-71.23055118	NaN	NaN	NaN	8.5, S
'14-Sep-2022 22:00:00'	-8.833333333	2	NaN	402.262075	18.43470833	28.45471028	90.9559755	8.32872093	2110.435427	1980.170497	591.1642288	1.636779307	0.044615605	-71.20620779	NaN	NaN	NaN	8.5, S
'14-Sep-2022 23:00:00'	-8.791666667	2	NaN	410.1461417	18.43560833	28.45646333	91.028104	8.324604263	2110.114529	1980.009635	591.7462464	1.635153401	0.044375195	-71.18161754	NaN	NaN	NaN	8.5, S
'15-Sep-2022 00:00:00'	-8.75	2	NaN	407.7501833	18.44090986	28.45798169	91.017066	8.320487596	2109.793632	1979.848774	592.4306029	1.633587268	0.044134786	-71.15677665	NaN	NaN	NaN	8.5, S
'15-Sep-2022 01:00:00'	-8.708333333	2	NaN	408.533475	18.44871111	28.45935694	91.003243	8.31637093	2109.472734	1979.687913	593.1735976	1.632055352	0.043894376	-71.13168127	NaN	NaN	NaN	8.5, S
'15-Sep-2022 02:00:00'	-8.666666667	2	NaN	412.90285	18.454825	28.46057139	91.0564685	8.312254263	2109.151837	1979.527051	593.8750867	1.630504406	0.043653967	-71.10632746	NaN	NaN	NaN	8.5, S
'15-Sep-2022 03:00:00'	-8.625	2	NaN	417.2589667	18.46266761	28.46182254	91.03560917	8.308137596	2108.830939	1979.36619	594.6196532	1.62897547	0.043413557	-71.08071123	NaN	NaN	NaN	8.5, S
'15-Sep-2022 04:00:00'	-8.583333333	2	NaN	417.256475	18.46788089	28.46302022	91.0766435	8.30402093	2108.510042	1979.205329	595.3016922	1.627414112	0.043173147	-71.05482847	NaN	NaN	NaN	8.5, S
'15-Sep-2022 05:00:00'	-8.541666667	2	NaN	417.5834167	18.474525	28.46420306	91.10786133	8.299904263	2108.189144	1979.044468	596.0189326	1.625871627	0.042932738	-71.02867499	NaN	NaN	NaN	8.5, S
'15-Sep-2022 06:00:00'	-8.5	2	NaN	412.6438417	18.47892958	28.46538901	91.1468385	8.295787596	2107.868246	1978.883606	596.6836679	1.624300994	0.042692328	-71.00224654	NaN	NaN	NaN	8.5, S
'15-Sep-2022 07:00:00'	-8.458333333	2	NaN	412.644775	18.48405263	28.46654432	91.1176225	8.29167093	2107.547349	1978.722745	597.3662858	1.622740358	0.042451918	-70.97553875	NaN	NaN	NaN	8.5, S
'15-Sep-2022 08:00:00'	-8.416666667	2	NaN	415.685625	18.48971111	28.46765389	91.09643317	8.287554263	2107.226451	1978.561884	598.0622085	1.62118757	0.042211509	-70.94854717	NaN	NaN	NaN	8.5, S
'15-Sep-2022 09:00:00'	-8.375	2	NaN	411.5906333	18.49478028	28.46873718	91.15295317	8.283437596	2106.905554	1978.401023	598.7446964	1.619628058	0.041971099	-70.92126724	NaN	NaN	NaN	8.5, S
'15-Sep-2022 10:00:00'	-8.333333333	2	19.16666667	405.6435917	18.49209972	28.47004155	91.15070267	8.27932093	2106.584656	1978.240161	599.2449462	1.617967598	0.04173069	-70.89369434	NaN	NaN	NaN	8.5, S
'15-Sep-2022 11:00:00'	-8.291666667	2	18.675	404.9270333	18.48889722	28.47136694	91.152874	8.275204263	2106.263759	1978.0793	599.7337298	1.616300803	0.04149028	-70.8658237	NaN	NaN	NaN	8.5, S
'15-Sep-2022 12:00:00'	-8.25	2	18.8	404.4607667	18.49026761	28.47272338	91.203818	8.271087596	2105.942861	1977.918439	600.3341112	1.614692257	0.04124987	-70.83765049	NaN	NaN	NaN	8.5, S
'15-Sep-2022 13:00:00'	-8.208333333	2	NaN	404.124125	18.49098061	28.47421939	91.13655733	8.26697093	2105.621964	1977.757577	600.9217107	1.613074092	0.041009461	-70.80916974	NaN	NaN	NaN	8.5, S
'15-Sep-2022 14:00:00'	-8.166666667	2	NaN	404.315325	18.49358333	28.47591333	91.23289167	8.262854263	2105.301066	1977.596716	601.5589613	1.611477899	0.040769051	-70.7803764	NaN	NaN	NaN	8.5, S
'15-Sep-2022 15:00:00'	-8.125	2	NaN	406.7290583	18.49454366	28.47766592	91.16748567	8.258737596	2104.980168	1977.435855	602.1583976	1.609860636	0.040528641	-70.75126529	NaN	NaN	NaN	8.5, S
'15-Sep-2022 16:00:00'	-8.083333333	2	NaN	402.0419083	18.49067778	28.47932833	91.20513967	8.25462093	2104.659271	1977.274994	602.6405362	1.608183898	0.040288232	-70.72183112	NaN	NaN	NaN	8.5, S
'15-Sep-2022 17:00:00'	-8.041666667	2	NaN	399.8664	18.48586667	28.48100056	91.189278	8.250504263	2104.338373	1977.114132	603.1006899	1.606495676	0.040047822	-70.69206848	NaN	NaN	NaN	8.5, S
'15-Sep-2022 18:00:00'	-8	2	NaN	404.725275	18.48041854	28.48275927	91.2498785	8.246387596	2104.017476	1976.953271	603.5474604	1.604798927	0.039807413	-70.66197184	NaN	NaN	NaN	8.5, S
'15-Sep-2022 19:00:00'	-7.958333333	2	NaN	413.181375	18.47399443	28.48443816	91.12192417	8.24227093	2103.696578	1976.79241	603.9700457	1.603091494	0.039567003	-70.63153556	NaN	NaN	NaN	8.5, S
'15-Sep-2022 20:00:00'	-7.916666667	2	NaN	401.1881083	18.46170637	28.4862831	91.09789567	8.238154263	2103.375681	1976.631549	604.2534935	1.601308591	0.039326593	-70.60075384	NaN	NaN	NaN	8.5, S
'15-Sep-2022 21:00:00'	-7.875	2	NaN	394.6664333	18.45076966	28.48795534	91.16265917	8.234037596	2103.054783	1976.470687	604.5676497	1.59954571	0.039086184	-70.56962077	NaN	NaN	NaN	8.5, S
'15-Sep-2022 22:00:00'	-7.833333333	2	NaN	397.08945	18.44102507	28.48950446	91.13906067	8.22992093	2102.733886	1976.309826	604.9094532	1.597800161	0.038845774	-70.53813031	NaN	NaN	NaN	8.5, S
'15-Sep-2022 23:00:00'	-7.791666667	2	NaN	394.4451333	18.4253241	28.49118726	91.15319083	8.225804263	2102.412988	1976.148965	605.1090846	1.595978697	0.038605364	-70.50627626	NaN	NaN	NaN	8.5, S
'16-Sep-2022 00:00:00'	-7.75	2	NaN	394.7948667	18.41387921	28.49273258	91.1394245	8.221687596	2102.09209	1975.988103	605.4105865	1.594213355	0.038364955	-70.47405229	NaN	NaN	NaN	8.5, S
'16-Sep-2022 01:00:00'	-7.708333333	2	NaN	395.5560667	18.39772981	28.4943766	91.12998483	8.21757093	2101.771193	1975.827242	605.5996851	1.592388471	0.038124545	-70.44145192	NaN	NaN	NaN	8.5, S
'16-Sep-2022 02:00:00'	-7.666666667	2	NaN	396.1252917	18.38273961	28.49594986	91.059196	8.213454263	2101.450295	1975.666381	605.8163745	1.590579918	0.037884136	-70.40846852	NaN	NaN	NaN	8.5, S
'16-Sep-2022 03:00:00'	-7.625	2	NaN	395.9722917	18.36512079	28.49766461	91.05943367	8.209337596	2101.129398	1975.50552	605.9717181	1.588737543	0.037643726	-70.37509529	NaN	NaN	NaN	8.5, S
'16-Sep-2022 04:00:00'	-7.583333333	2	NaN	397.951675	18.35658056	28.49916806	90.96956967	8.20522093	2100.8085	1975.344658	606.345388	1.587012363	0.037403316	-70.34132528	NaN	NaN	NaN	8.5, S
'16-Sep-2022 05:00:00'	-7.541666667	2	NaN	399.9028083	18.35465181	28.50055181	91.03486517	8.201104263	2100.487603	1975.183797	606.8790255	1.585372056	0.037162907	-70.30715137	NaN	NaN	NaN	8.5, S
'16-Sep-2022 06:00:00'	-7.5	2	NaN	400.2247667	18.35188764	28.502075	90.98985033	8.196987596	2100.166705	1975.022936	607.3952808	1.583720147	0.036922497	-70.27256628	NaN	NaN	NaN	8.5, S
'16-Sep-2022 07:00:00'	-7.458333333	2	NaN	409.5050333	18.35646389	28.50341472	90.97619183	8.19287093	2099.845808	1974.862075	608.0888052	1.582162789	0.036682087	-70.23756253	NaN	NaN	NaN	8.5, S
'16-Sep-2022 08:00:00'	-7.416666667	2	NaN	413.3039167	18.36999443	28.50458719	90.99083467	8.188754263	2099.52491	1974.701213	608.999861	1.580719802	0.036441678	-70.20213249	NaN	NaN	NaN	8.5, S
'16-Sep-2022 09:00:00'	-7.375	2	NaN	416.52415	18.38580392	28.50579188	91.030619	8.184637596	2099.204012	1974.540352	609.9688846	1.579305283	0.036201268	-70.16626831	NaN	NaN	NaN	8.5, S
'16-Sep-2022 10:00:00'	-7.333333333	2	NaN	416.7349333	18.40253333	28.50698167	91.04268217	8.18052093	2098.883115	1974.379491	610.9620554	1.577902834	0.035960858	-70.12996197	NaN	NaN	NaN	8.5, S
'16-Sep-2022 11:00:00'	-7.291666667	2	19.6	413.3414167	18.42012535	28.50820891	91.07004683	8.176404263	2098.562217	1974.218629	611.978875	1.576511092	0.035720449	-70.09320523	NaN	NaN	NaN	8.5, S
'16-Sep-2022 12:00:00'	-7.25	2	19.6	414.6581167	18.43972829	28.50929496	91.07420417	8.172287596	2098.24132	1974.057768	613.044921	1.575146599	0.035480039	-70.05598968	NaN	NaN	NaN	8.5, S
'16-Sep-2022 13:00:00'	-7.208333333	2	NaN	408.962975	18.45286111	28.51057139	91.12140183	8.16817093	2097.920422	1973.896907	613.956635	1.573699352	0.03523963	-70.01830665	NaN	NaN	NaN	8.5, S
'16-Sep-2022 14:00:00'	-7.166666667	2	NaN	406.3281083	18.45608357	28.51208078	91.1168065	8.164754263	2097.599525	1973.736046	614.6292437	1.572125935	0.03499922	-69.98014728	NaN	NaN	NaN	8.5, S
'16-Sep-2022 15:00:00'	-7.125	2	NaN	404.99355	18.45596919	28.51373697	91.180924	8.161337596	2097.278627	1973.575184	615.2228948	1.570509597	0.03475881	-69.9415025	NaN	NaN	NaN	8.5, S
'16-Sep-2022 16:00:00'	-7.083333333	2	NaN	407.20975	18.442175	28.51568528	91.2103575	8.15792093	2096.95773	1973.414323	615.4842571	1.568719746	0.034518401	-69.90236297	NaN	NaN	NaN	8.5, S
'16-Sep-2022 17:00:00'	-7.041666667	2	NaN	399.8208833	18.43182173	28.51736184	91.18412667	8.154504263	2096.636832	1973.253462	615.8269085	1.566976904	0.034277991	-69.86271913	NaN	NaN	NaN	8.5, S
'16-Sep-2022 18:00:00'	-7	2	NaN	396.586325	18.4230056	28.51898011	91.11633133	8.151087596	2096.315935	1973.092601	616.2072496	1.565254651	0.034037581	-69.82256118	NaN	NaN	NaN	8.5, S
'16-Sep-2022 19:00:00'	-6.958333333	2	NaN	396.626	18.41318889	28.52060139	91.18994467	8.14767093	2095.995037	1972.931739	616.5635441	1.563520653	0.033797172	-69.78187905	NaN	NaN	NaN	8.5, S
'16-Sep-2022 20:00:00'	-6.916666667	2	NaN	396.3536917	18.40663788	28.52208162	91.13269467	8.144254263	2095.674139	1972.770878	616.9990707	1.561829654	0.033556762	-69.7406624	NaN	NaN	NaN	8.5, S
'16-Sep-2022 21:00:00'	-6.875	2	NaN	397.1526167	18.39744944	28.5235882	91.062081	8.140837596	2095.353242	1972.610017	617.3704258	1.560106292	0.033316353	-69.69890063	NaN	NaN	NaN	8.5, S
'16-Sep-2022 22:00:00'	-6.833333333	2	NaN	402.116925	18.39184444	28.5250125	91.2275765	8.13742093	2095.032344	1972.449156	617.8299186	1.558429061	0.033075943	-69.65658286	NaN	NaN	NaN	8.5, S
'16-Sep-2022 23:00:00'	-6.791666667	2	NaN	403.7965833	18.38471111	28.52641472	91.05019667	8.134004263	2094.711447	1972.288294	618.2519303	1.556733821	0.032835533	-69.61369791	NaN	NaN	NaN	8.5, S
'17-Sep-2022 00:00:00'	-6.75	2	NaN	411.2713917	18.38427606	28.52753408	90.967527	8.130587596	2094.390549	1972.127433	618.8364212	1.555125544	0.032595124	-69.5702343	NaN	NaN	NaN	8.5, S
'17-Sep-2022 01:00:00'	-6.708333333	2	NaN	397.5899	18.38131302	28.52890388	91.03616433	8.12717093	2094.069652	1971.966572	619.3629933	1.553483541	0.032354714	-69.52618023	NaN	NaN	NaN	8.5, S
'17-Sep-2022 02:00:00'	-6.666666667	2	NaN	395.2076833	18.37820278	28.53010083	91.14799917	8.123754263	2093.748754	1971.80571	619.8840621	1.551842393	0.032114304	-69.4815236	NaN	NaN	NaN	8.5, S
'17-Sep-2022 03:00:00'	-6.625	2	NaN	392.799425	18.37815493	28.53121634	91.093276	8.120337596	2093.427857	1971.644849	620.4808725	1.550240631	0.031873895	-69.43625195	NaN	NaN	NaN	8.5, S
'17-Sep-2022 04:00:00'	-6.583333333	2	NaN	395.0288583	18.36937119	28.53253518	90.942189	8.11692093	2093.106959	1971.483988	620.8643886	1.548529186	0.031633485	-69.3903525	NaN	NaN	NaN	8.5, S
'17-Sep-2022 05:00:00'	-6.541666667	2	NaN	398.0045833	18.36078611	28.53388556	91.1303095	8.113504263	2092.786061	1971.323127	621.254006	1.546820529	0.031393076	-69.34381208	NaN	NaN	NaN	8.5, S
'17-Sep-2022 06:00:00'	-6.5	2	NaN	405.51975	18.3572338	28.5349831	90.97946533	8.110087596	2092.465164	1971.162265	621.7657476	1.545177584	0.031152666	-69.29661719	NaN	NaN	NaN	8.5, S
'17-Sep-2022 07:00:00'	-6.458333333	2	NaN	408.5724833	18.34901385	28.53624875	91.121203	8.10667093	2092.144266	1971.001404	622.1645548	1.543475796	0.030912256	-69.24875391	NaN	NaN	NaN	8.5, S
'17-Sep-2022 08:00:00'	-6.416666667	2	NaN	402.5522583	18.34317222	28.53739611	91.12160217	8.103254263	2091.823369	1970.840543	622.6215346	1.541805361	0.030671847	-69.20020795	NaN	NaN	NaN	8.5, S
'17-Sep-2022 09:00:00'	-6.375	2	NaN	401.5629333	18.33485634	28.53863437	91.04685067	8.099837596	2091.502471	1970.679682	623.018916	1.5401041	0.030431437	-69.1509646	NaN	NaN	NaN	8.5, S
'17-Sep-2022 10:00:00'	-6.333333333	2	NaN	401.4278083	18.33408864	28.53976371	91.1013625	8.09642093	2091.181574	1970.51882	623.6038725	1.538497487	0.030191027	-69.10100872	NaN	NaN	NaN	8.5, S
'17-Sep-2022 11:00:00'	-6.291666667	2	NaN	402.1822083	18.33460556	28.54100417	91.08401417	8.093004263	2090.860676	1970.357959	624.2236574	1.536905879	0.029950618	-69.05032473	NaN	NaN	NaN	8.5, S
'17-Sep-2022 12:00:00'	-6.25	2	NaN	399.9107167	18.33564124	28.54230989	91.02667317	8.089587596	2090.539779	1970.197098	624.8584702	1.535320405	0.029710208	-68.99889659	NaN	NaN	NaN	8.5, S
'17-Sep-2022 13:00:00'	-6.208333333	2	NaN	400.4795417	18.33832687	28.54355873	91.110212	8.08617093	2090.218881	1970.036236	625.5347764	1.533756361	0.029469799	-68.94670781	NaN	NaN	NaN	8.5, S
'17-Sep-2022 14:00:00'	-6.166666667	2	NaN	400.5753	18.33931944	28.54491444	91.09850867	8.083100096	2089.897983	1969.875375	626.1714191	1.532170838	0.029229389	-68.89374137	NaN	NaN	NaN	8.5, S
'17-Sep-2022 15:00:00'	-6.125	2	NaN	402.50675	18.3324691	28.54638483	91.105634	8.080029263	2089.577086	1969.714514	626.614041	1.530488519	0.028988979	-68.83997977	NaN	NaN	NaN	8.5, S
'17-Sep-2022 16:00:00'	-6.083333333	2	NaN	403.698925	18.32713889	28.54764806	91.06038617	8.07695843	2089.256188	1969.553653	627.0923197	1.528827906	0.02874857	-68.78540496	NaN	NaN	NaN	8.5, S
'17-Sep-2022 17:00:00'	-6.041666667	2	NaN	402.0229833	18.32628333	28.54878639	91.17954483	8.073887596	2088.935291	1969.392791	627.6818953	1.527224081	0.02850816	-68.72999836	NaN	NaN	NaN	8.5, S
'17-Sep-2022 18:00:00'	-6	2	NaN	400.6972583	18.32550562	28.54990421	91.086659	8.070816763	2088.614393	1969.23193	628.2740708	1.525622011	0.02826775	-68.67374079	NaN	NaN	NaN	8.5, S
'17-Sep-2022 19:00:00'	-5.958333333	2	NaN	398.6579167	18.32404167	28.55106583	91.04715517	8.06774593	2088.293496	1969.071069	628.8506276	1.52401162	0.028027341	-68.6166125	NaN	NaN	NaN	8.5, S
'17-Sep-2022 20:00:00'	-5.916666667	2	NaN	396.7709667	18.32522778	28.55212444	91.14228083	8.064675096	2087.972598	1968.910208	629.4932888	1.522435328	0.027786931	-68.55859313	NaN	NaN	NaN	8.5, S
'17-Sep-2022 21:00:00'	-5.875	2	NaN	398.2495	18.32386517	28.55322303	91.11172333	8.061604263	2087.651701	1968.749346	630.0733496	1.520828038	0.027546521	-68.49966165	NaN	NaN	NaN	8.5, S
'17-Sep-2022 22:00:00'	-5.833333333	2	NaN	417.73715	18.3265376	28.55423315	91.08599383	8.05853343	2087.330803	1968.588485	630.7548352	1.519271503	0.027306112	-68.43979639	NaN	NaN	NaN	8.5, S
'17-Sep-2022 23:00:00'	-5.791666667	2	NaN	424.6337667	18.33025485	28.55515263	91.13278383	8.055462596	2087.009905	1968.427624	631.4624268	1.517729255	0.027065702	-68.37897498	NaN	NaN	NaN	8.5, S
'18-Sep-2022 00:00:00'	-5.75	2	NaN	426.007125	18.33839888	28.55600674	91.14182417	8.052391763	2086.689008	1968.266762	632.2821727	1.516242143	0.026825293	-68.31717433	NaN	NaN	NaN	8.5, S
'18-Sep-2022 01:00:00'	-5.708333333	2	NaN	415.145025	18.34788858	28.55675348	91.133208	8.04932093	2086.36811	1968.105901	633.1357331	1.514773099	0.026584883	-68.25437059	NaN	NaN	NaN	8.5, S
'18-Sep-2022 02:00:00'	-5.666666667	2	NaN	412.2702083	18.34886981	28.5577626	91.13103067	8.046250096	2086.047213	1967.94504	633.7791921	1.513197974	0.026344473	-68.19053914	NaN	NaN	NaN	8.5, S
'18-Sep-2022 03:00:00'	-5.625	2	NaN	411.098475	18.3424382	28.55893258	91.143178	8.043179263	2085.726315	1967.784179	634.2381574	1.511531447	0.026104064	-68.12565456	NaN	NaN	NaN	8.5, S
'18-Sep-2022 04:00:00'	-5.583333333	2	NaN	408.45085	18.33690529	28.5599624	91.086317	8.04010843	2085.405418	1967.623317	634.718484	1.50987812	0.025863654	-68.05969056	NaN	NaN	NaN	8.5, S
'18-Sep-2022 05:00:00'	-5.541666667	2	NaN	404.6655	18.33209972	28.56100609	91.09577117	8.037037596	2085.08452	1967.462456	635.2183136	1.50823411	0.025623244	-67.99261997	NaN	NaN	NaN	8.5, S
'18-Sep-2022 06:00:00'	-5.5	2	NaN	407.5047917	18.32858427	28.5620191	91.13237883	8.033966763	2084.763623	1967.301595	635.7512899	1.506606731	0.025382835	-67.92441472	NaN	NaN	NaN	8.5, S
'18-Sep-2022 07:00:00'	-5.458333333	2	NaN	410.169675	18.32413092	28.56297187	91.0905925	8.03089593	2084.442725	1967.140734	636.2603185	1.504969296	0.025142425	-67.85504577	NaN	NaN	NaN	8.5, S
'18-Sep-2022 08:00:00'	-5.416666667	2	NaN	408.3495667	18.3089169	28.56434931	91.2399655	8.027825096	2084.121828	1966.979872	636.502964	1.503197415	0.024902016	-67.78448308	NaN	NaN	NaN	8.5, S
'18-Sep-2022 09:00:00'	-5.375	2	NaN	409.5177083	18.28700843	28.56605955	91.14132467	8.024754263	2083.80093	1966.819011	636.5809777	1.501341741	0.024661606	-67.71269557	NaN	NaN	NaN	8.5, S
'18-Sep-2022 10:00:00'	-5.333333333	2	NaN	412.1567083	18.26551111	28.56769667	91.12076017	8.02168343	2083.480032	1966.65815	636.6687457	1.499492981	0.024421196	-67.63965107	NaN	NaN	NaN	8.5, S
'18-Sep-2022 11:00:00'	-5.291666667	2	NaN	409.7621	18.24468056	28.56929667	91.09884617	8.018612596	2083.159135	1966.497288	636.7733587	1.497653781	0.024180787	-67.56531627	NaN	NaN	NaN	8.5, S
'18-Sep-2022 12:00:00'	-5.25	2	NaN	408.1586833	18.22465449	28.57092472	90.98762983	8.015541763	2082.838237	1966.336427	636.8993753	1.495825024	0.023940377	-67.48965668	NaN	NaN	NaN	8.5, S
'18-Sep-2022 13:00:00'	-5.208333333	2	NaN	403.195975	18.20697222	28.57245556	91.05150983	8.01247093	2082.51734	1966.175566	637.0840459	1.494026593	0.023699967	-67.41263657	NaN	NaN	NaN	8.5, S
'18-Sep-2022 14:00:00'	-5.166666667	2	NaN	400.5381667	18.19192778	28.57389861	90.93914467	8.009929263	2082.196442	1966.014705	637.3350746	1.492261798	0.023459558	-67.3342189	NaN	NaN	NaN	8.5, S
'18-Sep-2022 15:00:00'	-5.125	2	NaN	398.9253417	18.17616573	28.57547416	90.94561017	8.007387596	2081.875545	1965.853843	637.5704621	1.490487806	0.023219148	-67.25436529	NaN	NaN	NaN	8.5, S
'18-Sep-2022 16:00:00'	-5.083333333	2	NaN	400.0941583	18.16558056	28.57686472	90.94918517	8.00484593	2081.554647	1965.692982	637.9355455	1.488778831	0.022978739	-67.17303593	NaN	NaN	NaN	8.5, S
'18-Sep-2022 17:00:00'	-5.041666667	2	NaN	400.5699917	18.14970195	28.57852646	90.88260667	8.002304263	2081.23375	1965.532121	638.1704606	1.487004254	0.022738329	-67.09018954	NaN	NaN	NaN	8.5, S
'18-Sep-2022 18:00:00'	-5	2	NaN	400.399175	18.13640336	28.58014426	90.99245667	7.999762596	2080.912852	1965.37126	638.4711102	1.48526194	0.022497919	-67.00578326	NaN	NaN	NaN	8.5, S
'18-Sep-2022 19:00:00'	-4.958333333	2	NaN	399.2275917	18.12363611	28.5817325	90.86649083	7.99722093	2080.591954	1965.210398	638.7854622	1.483527163	0.02225751	-66.91977262	NaN	NaN	NaN	8.5, S
'18-Sep-2022 20:00:00'	-4.916666667	2	NaN	396.5986917	18.11270752	28.58331253	90.88394733	7.994679263	2080.271057	1965.049537	639.1473024	1.481815255	0.0220171	-66.83211144	NaN	NaN	NaN	8.5, S
'18-Sep-2022 21:00:00'	-4.875	2	NaN	398.6422667	18.10120448	28.58488711	90.96147267	7.992137596	2079.950159	1964.888676	639.4950192	1.480097367	0.02177669	-66.74275175	NaN	NaN	NaN	8.5, S
'18-Sep-2022 22:00:00'	-4.833333333	2	NaN	401.503675	18.09319167	28.58636972	90.855678	7.98959593	2079.629262	1964.727814	639.9312488	1.478422864	0.021536281	-66.6516437	NaN	NaN	NaN	8.5, S
'18-Sep-2022 23:00:00'	-4.791666667	2	NaN	406.314525	18.09042897	28.58767604	90.78437267	7.987054263	2079.308364	1964.566953	640.4998994	1.476813497	0.021295871	-66.55873547	NaN	NaN	NaN	8.5, S
'19-Sep-2022 00:00:00'	-4.75	2	NaN	405.64765	18.08416527	28.58910056	90.797532	7.984512596	2078.987467	1964.406092	640.9816236	1.475161834	0.021055462	-66.46397319	NaN	NaN	NaN	8.5, S
'19-Sep-2022 01:00:00'	-4.708333333	2	NaN	406.539575	18.07686389	28.59055083	90.8070005	7.98197093	2078.666569	1964.245231	641.4379506	1.473498259	0.020815052	-66.36730078	NaN	NaN	NaN	8.5, S
'19-Sep-2022 02:00:00'	-4.666666667	2	NaN	407.3831333	18.08219777	28.59145933	90.91142133	7.979429263	2078.345672	1964.084369	642.2108005	1.471991327	0.020574642	-66.2686599	NaN	NaN	NaN	8.5, S
'19-Sep-2022 03:00:00'	-4.625	2	NaN	409.973875	18.09232493	28.59228711	90.86239133	7.976887596	2078.024774	1963.923508	643.106922	1.470542662	0.020334233	-66.16798982	NaN	NaN	NaN	8.5, S
'19-Sep-2022 04:00:00'	-4.583333333	2	NaN	413.1100583	18.09718889	28.59325583	90.86062083	7.97434593	2077.703876	1963.762647	643.8714336	1.469030471	0.020093823	-66.06522727	NaN	NaN	NaN	8.5, S
[truncated: 13,832 more rows]
