# Supplementary figures and images for: A comprehensive assessment of electrochemical ocean alkalinity enhancement in seawater: kinetics, efficiency, and precipitation thresholds
Source: Copernicus journal article supplement (doi:10.5194/egusphere-2024-108), 2024-01-22

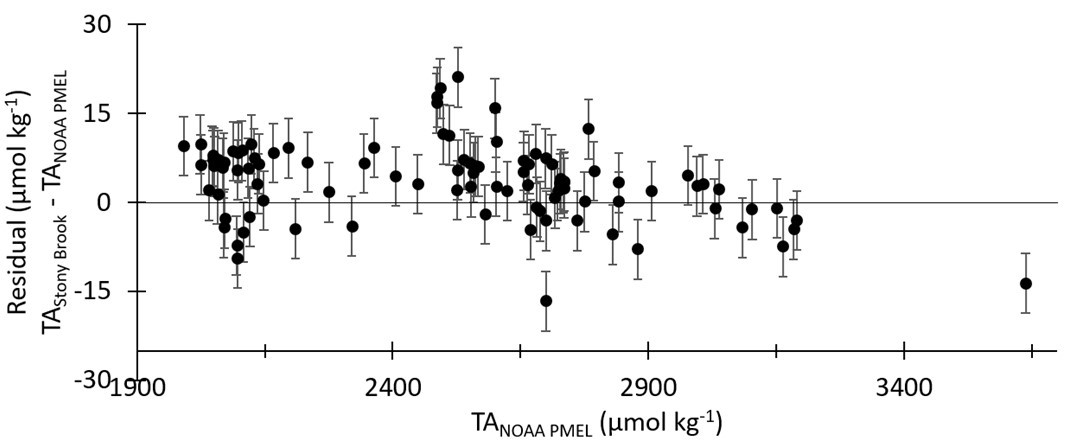

Supplement: Supplementary file 2 [file egusphere-2024-108-supplement.zip › fS01.JPG]

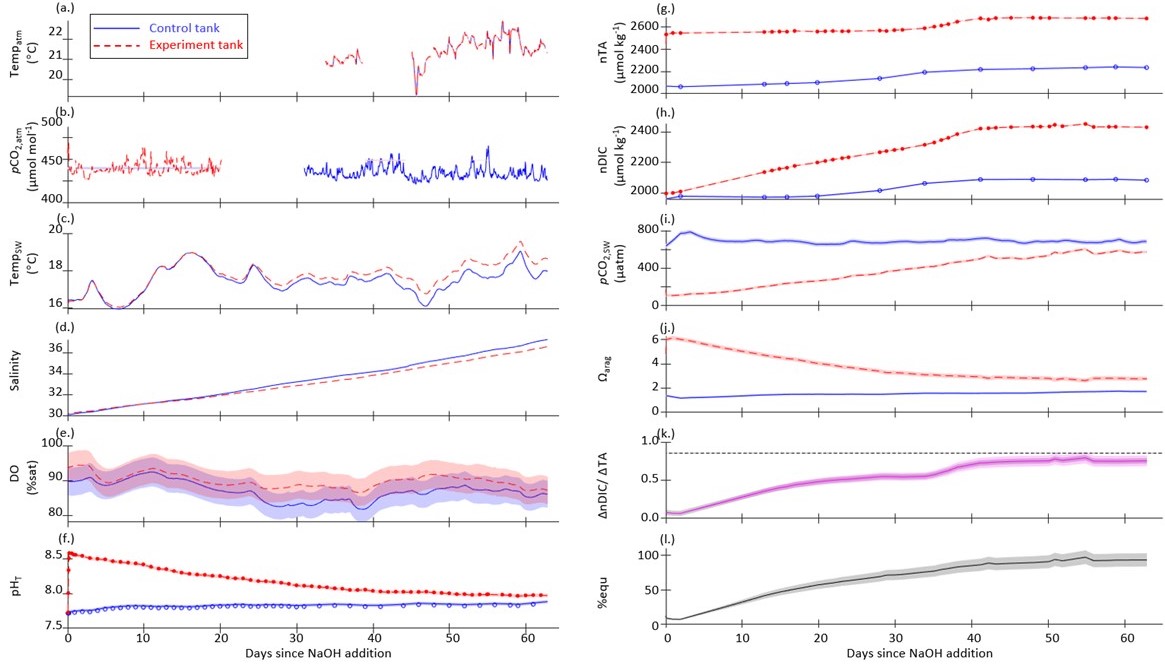

Supplement: Supplementary file 2 [file egusphere-2024-108-supplement.zip › fS02.JPG]

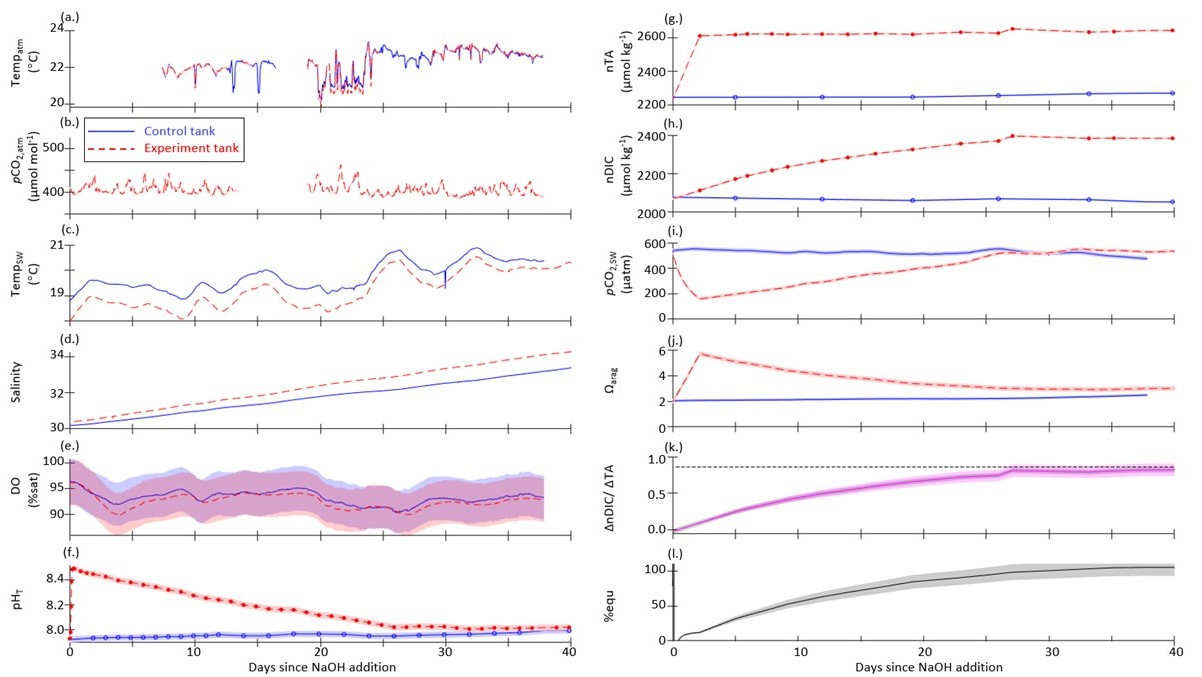

Supplement: Supplementary file 2 [file egusphere-2024-108-supplement.zip › fS03.JPG]

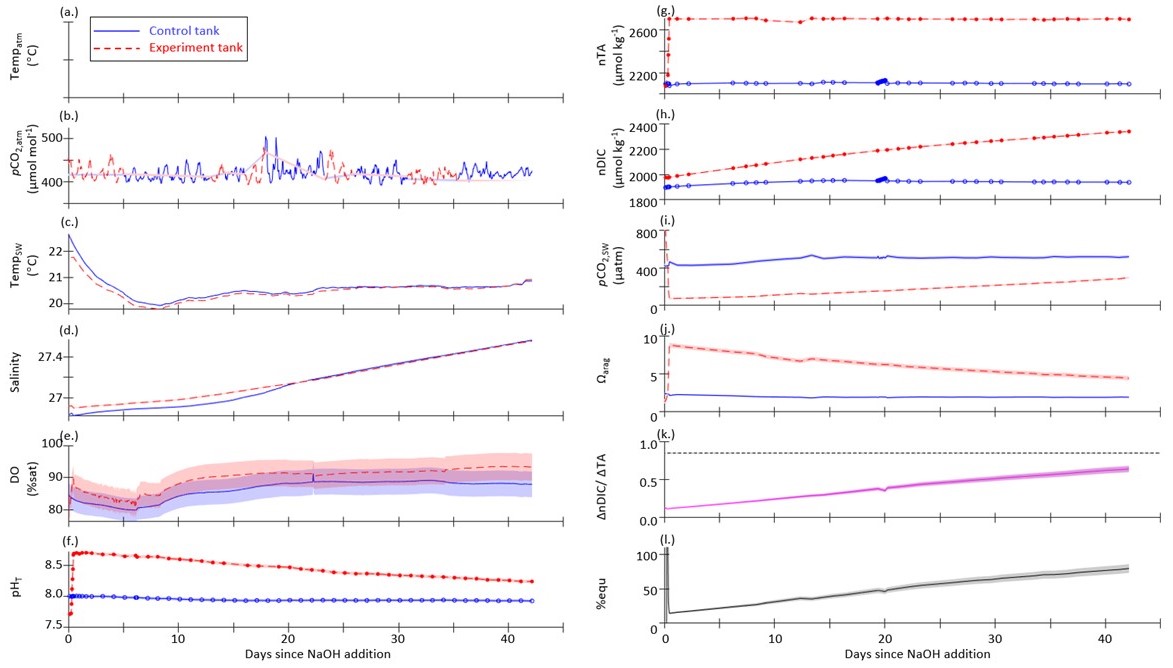

Supplement: Supplementary file 2 [file egusphere-2024-108-supplement.zip › fS04.JPG]

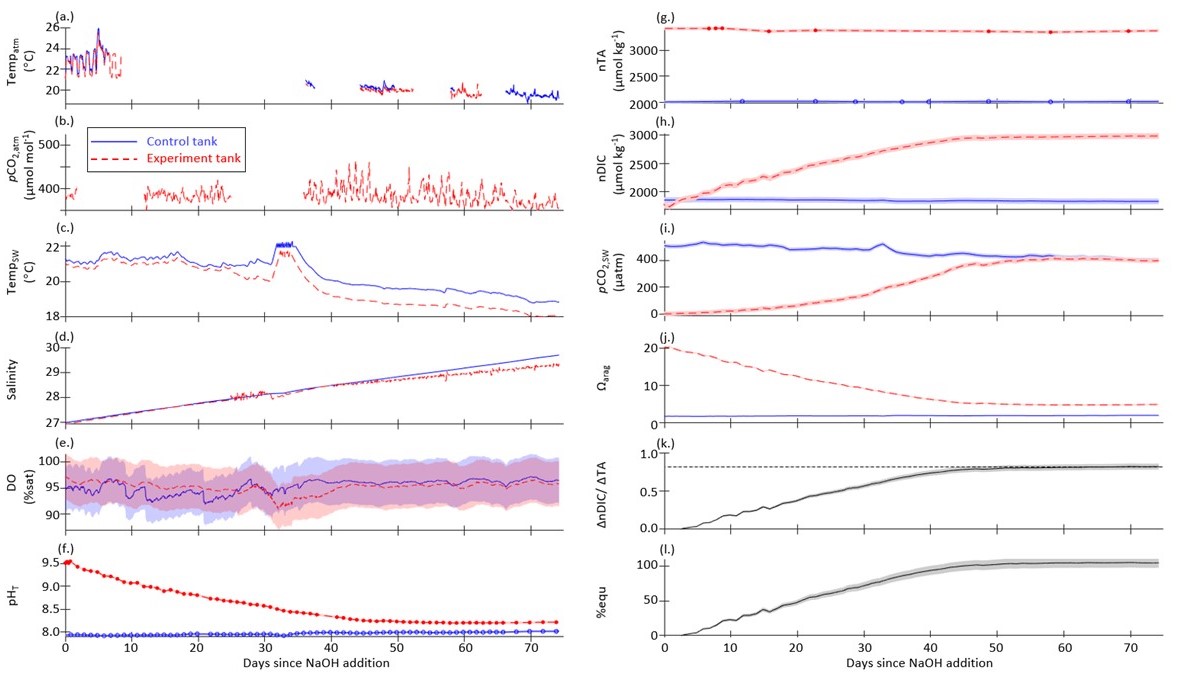

Supplement: Supplementary file 2 [file egusphere-2024-108-supplement.zip › fS05.JPG]

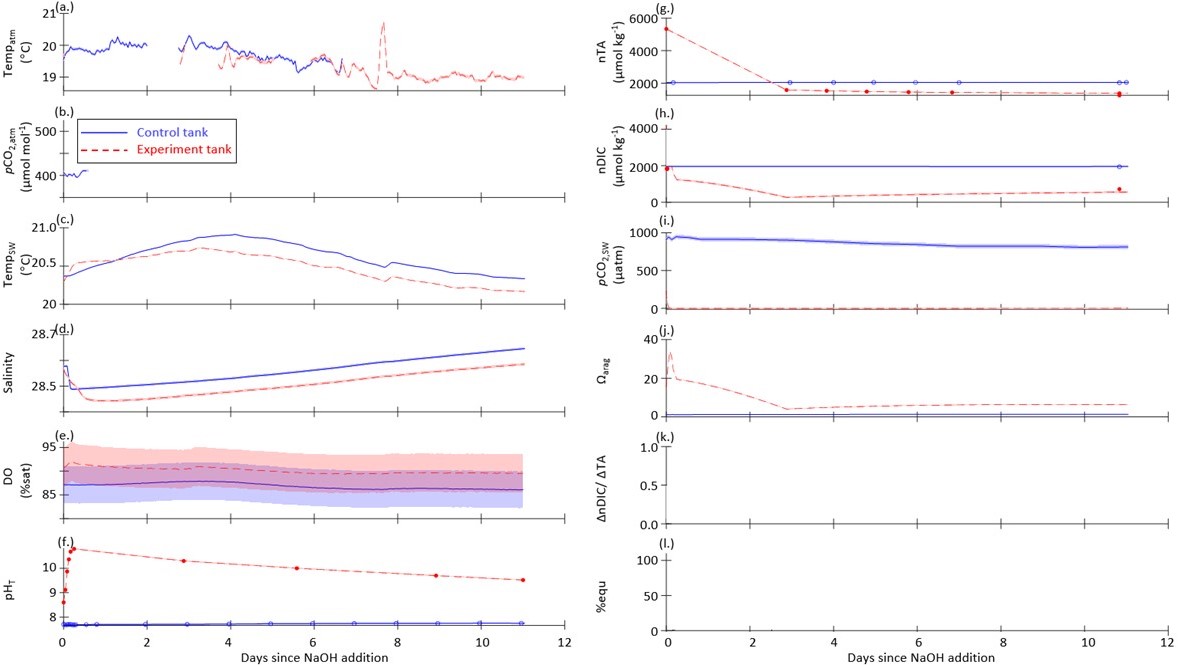

Supplement: Supplementary file 2 [file egusphere-2024-108-supplement.zip › fS06.JPG]
